# Supplementary material for: Pattern regulation in a regenerating jellyfish
Source: eLife. 2020 Sep 7;9:e54868. doi: 10.7554/eLife.54868 (PMC7524552; doi:10.7554/eLife.54868)
Supplement: Figure 2—source data 1. [file elife-54868-fig2-data1.xlsx]

## Sheet: Figure2B,2C,S1B
	Figure2B,2C,S1B	timepoint	EdU+ cells in primordium	EdU+ cells in canal 1	EdU+ cells in canal 2	EdU+ cells in canal 3	EdU+ cells in canal 4
	jellyfish 1	12 hpd	8	not recorded	not recorded	not recorded	not recorded
	jellyfish 2	12 hpd	41	4	3	0	2
	jellyfish 3	12 hpd	14	1	1	4	not recorded
	jellyfish 4	12 hpd	3	1	1	0	0
	jellyfish 5	12 hpd	8	not recorded	0	0	0
	jellyfish 6	12 hpd	2	1	0	0	0
	jellyfish 7	12 hpd	1	1	0	0	0
	jellyfish 8	12 hpd	0	1	0	0	0
	jellyfish 9	12 hpd	1	0	1	0	0
	jellyfish 10	12 hpd	30	1	0	0	0
	jellyfish 11	12 hpd	8	0	not recorded	0	not recorded
	jellyfish 12	12 hpd	3	0	0	0	0
	jellyfish 13	12 hpd	4	0	1	0	3
	jellyfish 14	12 hpd	8	0	1	not recorded	not recorded
	jellyfish 15	12 hpd	1	1	0	1	0
	jellyfish 16	12 hpd	6	1	0	2	2
	jellyfish 17	12 hpd	18	1	4	1	0
	jellyfish 18	12 hpd	8	1	2	0	2
	jellyfish 19	12 hpd	29	1	0	not recorded	1
	jellyfish 20	12 hpd	3	0	1	0	0
	jellyfish 21	12 hpd	not recorded	1	0	1	0
	jellyfish 22	12 hpd	2	1	3	0	1
	jellyfish 23	12 hpd	not recorded	1	1	2	1
	jellyfish 24	12 hpd	not recorded	0	1	2	1
	jellyfish 25	12 hpd	not recorded	2	2	1	0
	jellyfish 26	12 hpd	not recorded	0	1	0	1
	jellyfish 27	12 hpd	not recorded	0	0	1	0
	jellyfish 28	12 hpd	not recorded	1	0	1	0
	jellyfish 29	12 hpd	not recorded	0	0	0	0
	jellyfish 30	12 hpd	not recorded	0	0	0	0
	jellyfish 31	12 hpd	not recorded	0	0	0	1
	jellyfish 32	12 hpd	not recorded	0	4	0	2
	jellyfish 33	24 hpd	270	1	17	3	not recorded
	jellyfish 34	24 hpd	45	2	7	1	1
	jellyfish 35	24 hpd	39	2	4	3	1
	jellyfish 36	24 hpd	72	1	2	3	1
	jellyfish 37	24 hpd	29	2	2	2	8
	jellyfish 38	24 hpd	274	8	4	3	8
	jellyfish 39	24 hpd	63	2	0	3	2
	jellyfish 40	24 hpd	79	4	0	2	8
	jellyfish 41	24 hpd	28	not recorded	2	4	2
	jellyfish 42	24 hpd	103	4	5	5	5
	jellyfish 43	24 hpd	109	5	6	3	5
	jellyfish 44	24 hpd	132	6	4	7	4
	jellyfish 45	24 hpd	124	0	8	4	0
	jellyfish 46	24 hpd	not recorded	0	3	1	6
	jellyfish 47	24 hpd	not recorded	0	1	1	1
	jellyfish 48	24 hpd	not recorded	0	0	0	0
	jellyfish 49	24 hpd	not recorded	0	0	not recorded	0
	jellyfish 50	24 hpd	not recorded	0	1	0	0
	jellyfish 51	24 hpd	not recorded	0	0	2	0
	jellyfish 52	24 hpd	not recorded	0	0	1	0
	jellyfish 53	24 hpd	not recorded	0	not recorded	0	0
	jellyfish 54	48hpd	670	13	not recorded	10	not recorded
	jellyfish 55	48hpd	571	not recorded	not recorded	not recorded	not recorded
	jellyfish 56	48hpd	595	14	22	6	14
	jellyfish 57	48hpd	716	19	12	13	29
	jellyfish 58	48hpd	600	15	17	13	13
	jellyfish 59	48hpd	584	34	30	33	49
	jellyfish 60	48hpd	417	24	33	16	28
	jellyfish 61	48hpd	795	20	42	37	49
	jellyfish 62	48hpd	445	24	25	26	37
	jellyfish 63	48hpd	572	45	26	39	40
	jellyfish 64	48hpd	685	26	18	30	36
	jellyfish 65	48hpd	520	47	33	68	38
	jellyfish 66	48hpd	469	27	39	32	42
	jellyfish 67	48hpd	not recorded	11	6	6	17
	jellyfish 68	48hpd	not recorded	4	6	12	5
	jellyfish 69	48hpd	not recorded	4	9	13	21
	jellyfish 70	48hpd	not recorded	7	8	10	9
	jellyfish 71	48hpd	not recorded	10	15	7	8
	jellyfish 72	48hpd	not recorded	19	7	10	7
	jellyfish 73	48hpd	not recorded	9	7	5	17
	jellyfish 74	48hpd	not recorded	4	not recorded	3	4
	jellyfish 75	72 hpd	784	not recorded	not recorded	not recorded	not recorded
	jellyfish 76	72 hpd	1061	not recorded	not recorded	not recorded	not recorded
	jellyfish 77	72 hpd	749	not recorded	not recorded	not recorded	not recorded
	jellyfish 78	72 hpd	784	not recorded	13	3	12
	jellyfish 79	72 hpd	612	not recorded	not recorded	not recorded	not recorded
	jellyfish 80	72 hpd	870	16	13	16	16
	jellyfish 81	72 hpd	764	not recorded	not recorded	not recorded	not recorded
	jellyfish 82	72 hpd	877	30	26	30	33
	jellyfish 83	72 hpd	628	32	33	45	not recorded
	jellyfish 84	72 hpd	792	19	12	5	9
	jellyfish 85	72 hpd	1262	12	10	5	7
	jellyfish 86	72 hpd	1276	5	10	6	25
	jellyfish 87	72 hpd	929	8	8	16	13
	jellyfish 88	72 hpd	1116	25	30	20	26
	jellyfish 89	72 hpd	1248	48	38	47	36
	jellyfish 90	72 hpd	not recorded	21	20	8	21
	jellyfish 91	72 hpd	not recorded	12	12	16	8
	jellyfish 92	72 hpd	not recorded	13	9	17	14
	jellyfish 93	72 hpd	not recorded	13	8	11	not recorded
	jellyfish 94	72 hpd	not recorded	17	9	7	19
	jellyfish 95	96 hpd	not recorded	2	3	3	2
	jellyfish 96	96 hpd	not recorded	1	3	1	3
	jellyfish 97	96 hpd	not recorded	2	1	1	3
	jellyfish 98	96 hpd	not recorded	10	3	2	4
	jellyfish 99	96 hpd	not recorded	9	6	4	2
	jellyfish 100	96 hpd	not recorded	2	1	4	3
	jellyfish 101	96 hpd	not recorded	3	1	5	4
	jellyfish 102	96 hpd	not recorded	2	1	6	3
	jellyfish 103	96 hpd	not recorded	3	1	5	0
	jellyfish 104	96 hpd	not recorded	4	2	1	0
	jellyfish 105	96 hpd	not recorded	6	4	8	3
	jellyfish 106	96 hpd	not recorded	1	5	8	8
	jellyfish 107	96 hpd	not recorded	5	1	3	3
	jellyfish 108	96 hpd	not recorded	1	4	0	2
	jellyfish 109	96 hpd	750	not recorded	not recorded	not recorded	not recorded
	jellyfish 110	96 hpd	1250	not recorded	not recorded	not recorded	not recorded
	jellyfish 111	96 hpd	798	not recorded	not recorded	not recorded	not recorded
	jellyfish 112	96 hpd	607	not recorded	not recorded	not recorded	not recorded
	jellyfish 113	96 hpd	453	not recorded	not recorded	not recorded	not recorded
	jellyfish 114	96 hpd	821	not recorded	not recorded	not recorded	not recorded
	jellyfish 115	n.d. fed	not applicable	2	2	2	2
	jellyfish 116	n.d. fed	not applicable	16	11	8	7
	jellyfish 117	n.d. fed	not applicable	18	15	16	7
	jellyfish 118	n.d. fed	not applicable	0		1	5
	jellyfish 119	n.d. fed	not applicable	13	12	10	11
	jellyfish 120	n.d. fed	not applicable	8	5	6	6
	jellyfish 121	n.d. fed	not applicable	5	6	2	8
	jellyfish 122	n.d. fed	not applicable	4	5	8	2
	jellyfish 123	n.d. fed	not applicable	5	4	4	4
	jellyfish 124	n.d. fed	not applicable	9	3	5	6
	jellyfish 125	n.d. fed	not applicable	7	8	2	3
	jellyfish 126	n.d. fed	not applicable	2	3	10	5
	jellyfish 127	n.d. fed	not applicable	not recorded	not recorded	8	5
	jellyfish 128	n.d. fed	not applicable	6	5	7	6
	jellyfish 129	n.d. fed	not applicable	6	5	7	4
	jellyfish 130	n.d. fed	not applicable	0	0	0	0
	jellyfish 131	n.d. fed	not applicable	4	1	1	1
	jellyfish 132	n.d. fed	not applicable	0	4	7	1
	jellyfish 133	n.d. fed	not applicable	3	4	3	3
	jellyfish 134	n.d. fed	not applicable	3	4	9
	jellyfish 135	n.d. fed	not applicable	11	7	10	13
	jellyfish 136	n.d. unfed 12h	not applicable	6	0	3	3
	jellyfish 137	n.d. unfed 12h	not applicable	5	2	5	10
	jellyfish 138	n.d. unfed 12h	not applicable	2	4	7	6
	jellyfish 139	n.d. unfed 12h	not applicable	2	3	3	4
	jellyfish 140	n.d. unfed 12h	not applicable	1	1	4	2
	jellyfish 141	n.d. unfed 12h	not applicable	5	1	7	7
	jellyfish 142	n.d. unfed 12h	not applicable	3	2	1	0
	jellyfish 143	n.d. unfed 12h	not applicable	2	1	0	4
	jellyfish 144	n.d. unfed 12h	not applicable	2	6	3	5
	jellyfish 145	n.d. unfed 12h	not applicable	3	4	2	1
	jellyfish 146	n.d. unfed 12h	not applicable	2	1	1	4
	jellyfish 147	n.d. unfed 12h	not applicable	1	1	6	2
	jellyfish 148	n.d. unfed 12h	not applicable	6	3	3	7
	jellyfish 149	n.d. unfed 12h	not applicable	7	7	2	6
	jellyfish 150	n.d. unfed 24h	not applicable	0	1	0	0
	jellyfish 151	n.d. unfed 24h	not applicable	0	1	0	0
	jellyfish 152	n.d. unfed 24h	not applicable	0	1	0	0
	jellyfish 153	n.d. unfed 24h	not applicable	1	2	1	0
	jellyfish 154	n.d. unfed 24h	not applicable	0	0	0	1
	jellyfish 155	n.d. unfed 24h	not applicable	0	0	0	2
	jellyfish 156	n.d. unfed 24h	not applicable	0	0	0	0
	jellyfish 157	n.d. unfed 24h	not applicable	0	0	1	3
	jellyfish 158	n.d. unfed 24h	not applicable	1	0	0	1
	jellyfish 159	n.d. unfed 48h	not applicable	1	0	0	0
	jellyfish 160	n.d. unfed 48h	not applicable	0	1	0	0
	jellyfish 161	n.d. unfed 48h	not applicable	1	3	0	1
	jellyfish 162	n.d. unfed 48h	not applicable	0	0	0	1
	jellyfish 163	n.d. unfed 48h	not applicable	0	1	1	1
	jellyfish 164	n.d. unfed 48h	not applicable	1	0	0	0
	jellyfish 165	n.d. unfed 72h	not applicable	0	0	1	2
	jellyfish 166	n.d. unfed 72h	not applicable	0	0	3	2
	jellyfish 167	n.d. unfed 72h	not applicable	1	1	9	5
	jellyfish 168	n.d. unfed 72h	not applicable	2	2	2	1
	jellyfish 169	n.d. unfed 72h	not applicable	2	2	1	5
	jellyfish 170	n.d. unfed 72h	not applicable	1	1	0	0
	jellyfish 171	n.d. unfed 72h	not applicable	0	0	1	2
	jellyfish 172	n.d. unfed 72h	not applicable	1	1	7	5
	jellyfish 173	n.d. unfed 72h	not applicable	0	0	1	2
	jellyfish 174	n.d. unfed 72h	not applicable	2	2	3	3
	jellyfish 175	n.d. unfed 72h	not applicable	2	2	1	4
	jellyfish 176	n.d. unfed 72h	not applicable	2	2	0	1
	jellyfish 177	n.d. unfed 96h	not applicable	1	5	not recorded	2
	jellyfish 178	n.d. unfed 96h	not applicable	0	8	not recorded	1
	jellyfish 179	n.d. unfed 96h	not applicable	0	4	2	1
	jellyfish 180	n.d. unfed 96h	not applicable	0	2	0	0
	jellyfish 181	n.d. unfed 96h	not applicable	0	0	0	0
	jellyfish 182	n.d. unfed 96h	not applicable	not recorded	0	0	1
	jellyfish 183	n.d. unfed 96h	not applicable	1	0	3	0
	jellyfish 184	n.d. unfed 96h	not applicable	1	0	1	3

## Sheet: Figure2-S1E
	Figure2-S1E	treatment	EdU+ cells (1h pulse)		EdU+ cells per bulb	control H2O	HU 10µM 3h
	bulb 1	control H2O	54		≤5	0.0517241	1
	bulb 2	control H2O	167		> 5 and < 100	0.0862069	0
	bulb 3	control H2O	177		≥100	0.862069	0
	bulb 4	control H2O	206
	bulb 5	control H2O	142
	bulb 6	control H2O	182
	bulb 7	control H2O	199
	bulb 8	control H2O	81
	bulb 9	control H2O	128
	bulb 10	control H2O	142
	bulb 11	control H2O	191
	bulb 12	control H2O	156
	bulb 13	control H2O	230
	bulb 14	control H2O	224
	bulb 15	control H2O	179
	bulb 16	control H2O	242
	bulb 17	control H2O	257
	bulb 18	control H2O	1
	bulb 19	control H2O	104
	bulb 20	control H2O	158
	bulb 21	control H2O	158
	bulb 22	control H2O	155
	bulb 23	control H2O	135
	bulb 24	control H2O	135
	bulb 25	control H2O	159
	bulb 26	control H2O	188
	bulb 27	control H2O	156
	bulb 28	control H2O	157
	bulb 29	control H2O	104
	bulb 30	control H2O	120
	bulb 31	control H2O	118
	bulb 32	control H2O	73
	bulb 33	control H2O	56
	bulb 34	control H2O	204
	bulb 35	control H2O	172
	bulb 36	control H2O	142
	bulb 37	control H2O	1
	bulb 38	control H2O	0
	bulb 39	control H2O	83
	bulb 40	control H2O	219
	bulb 41	control H2O	172
	bulb 42	control H2O	261
	bulb 43	control H2O	262
	bulb 44	control H2O	206
	bulb 45	control H2O	204
	bulb 46	control H2O	220
	bulb 47	control H2O	225
	bulb 48	control H2O	223
	bulb 49	control H2O	205
	bulb 50	control H2O	188
	bulb 51	control H2O	386
	bulb 52	control H2O	352
	bulb 53	control H2O	287
	bulb 54	control H2O	263
	bulb 55	control H2O	411
	bulb 56	control H2O	544
	bulb 57	control H2O	186
	bulb 58	control H2O	272
	bulb 59	HU 10mM 3h	0
	bulb 60	HU 10mM 3h	0
	bulb 61	HU 10mM 3h	0
	bulb 62	HU 10mM 3h	0
	bulb 63	HU 10mM 3h	0
	bulb 64	HU 10mM 3h	0
	bulb 65	HU 10mM 3h	0
	bulb 66	HU 10mM 3h	0
	bulb 67	HU 10mM 3h	0
	bulb 68	HU 10mM 3h	0
	bulb 69	HU 10mM 3h	0
	bulb 70	HU 10mM 3h	0
	bulb 71	HU 10mM 3h	0
	bulb 72	HU 10mM 3h	0
	bulb 73	HU 10mM 3h	0
	bulb 74	HU 10mM 3h	0
	bulb 75	HU 10mM 3h	0
	bulb 76	HU 10mM 3h	0
	bulb 77	HU 10mM 3h	0
	bulb 78	HU 10mM 3h	0
	bulb 79	HU 10mM 3h	1
	bulb 80	HU 10mM 3h	0
	bulb 81	HU 10mM 3h	0
	bulb 82	HU 10mM 3h	2
	bulb 83	HU 10mM 3h	0
	bulb 84	HU 10mM 3h	0
