# Supplementary material for: Pattern regulation in a regenerating jellyfish
Source: eLife. 2020 Sep 7;9:e54868. doi: 10.7554/eLife.54868 (PMC7524552; doi:10.7554/eLife.54868)
Supplement: Figure 3—source data 1. [file elife-54868-fig3-data1.xlsx]

## Sheet: Figure 3H
	Figure 3H	Condition	EdU+ cells in manubrium / blastema	EdU+/Nanos1+ cells in manubrium / blastema
	Jellyfish 1	EdU+ gonad grafted - Manubrium dissected / 3 dpg - 2dpd	23	1
	Jellyfish 2	EdU+ gonad grafted - Manubrium dissected / 3 dpg - 2dpd	17	3
	Jellyfish 3	EdU+ gonad grafted - Manubrium dissected / 3 dpg - 2dpd	27	9
	Jellyfish 4	EdU+ gonad grafted - Manubrium dissected / 3 dpg - 2dpd	24	3
	Jellyfish 5	EdU+ gonad grafted - Manubrium dissected / 3 dpg - 2dpd	8	2
	Jellyfish 6	EdU+ gonad grafted - Manubrium dissected / 3 dpg - 2dpd	3	1
	Jellyfish 7	EdU+ gonad grafted - Manubrium dissected / 3 dpg - 2dpd	16	1
	Jellyfish 8	EdU+ gonad grafted - Manubrium dissected / 3 dpg - 2dpd	32	5
	Jellyfish 9	EdU+ gonad grafted - Manubrium not dissected / 3dpg	1	0
	Jellyfish 10	EdU+ gonad grafted - Manubrium not dissected / 3dpg	0	0
	Jellyfish 11	EdU+ gonad grafted - Manubrium not dissected / 3dpg	0	0
	Jellyfish 12	EdU+ gonad grafted - Manubrium not dissected / 3dpg	1	0
	Jellyfish 13	EdU+ gonad grafted - Manubrium not dissected / 3dpg	0	0
	Jellyfish 14	EdU+ gonad grafted - Manubrium not dissected / 3dpg	0	0
