# Supplementary material for: Pattern regulation in a regenerating jellyfish
Source: eLife. 2020 Sep 7;9:e54868. doi: 10.7554/eLife.54868 (PMC7524552; doi:10.7554/eLife.54868)
Supplement: Figure 4—source data 1. [file elife-54868-fig4-data1.xlsx]

## Sheet: Figure4D
	Figure4D	24 hpd			48 hpd			72 hpd
	Nb jellyfish	Fed	Starving	Regenerating	Fed	Starving	Regenerating	Fed	Starving	Regenerating
	cells clusters	0	1	19	0	2	10	0	0	3
	Isolated cells	6	7	4	6	10	10	4	7	10
	No cells	18	16	1	18	12	3	20	17	10
	Nb jellyfish	24	24	24	24	24	23	24	24	23
