# Supplementary material for: Pattern regulation in a regenerating jellyfish
Source: eLife. 2020 Sep 7;9:e54868. doi: 10.7554/eLife.54868 (PMC7524552; doi:10.7554/eLife.54868)
Supplement: Figure 6—figure supplement 1—source data 1. [file elife-54868-fig6-figsupp1-data1.xlsx]

## Sheet: Figure6-S1D
	Figure6-S1D	no blastema	1 blastema/manubrium	2 fused blastema/manubrium	2 sep blastema/manubrium	total jellyfish
	24hpd	23	48	0	34	105
	5 dpd	0	105	25	18	148
	Figure6-S1D	no blastema	1 blastema/manub	2 fused blastema/manub	2 sep blastema/manub
	24hpd	0.219048	0.457143	0	0.32381
	5 dpd	0	0.709459	0.168919	0.121622
