# Supplementary material for: Pattern regulation in a regenerating jellyfish
Source: eLife. 2020 Sep 7;9:e54868. doi: 10.7554/eLife.54868 (PMC7524552; doi:10.7554/eLife.54868)
Supplement: Figure 10—source data 1. [file elife-54868-fig10-data1.xlsx]

## Sheet: Fig10B-tpm_Wnt_related_genes
Figure10B
	gene_name	gene_ID	MdCA_ND_1	MdCA_ND_2	MdCA_0hs_1	MdCA_0hs_2	MdCA_6hs_1	MdCA_6hs_2	MdCA_12hs_1	MdCA_12hs_2	MdCA_24hs_1	MdCA_24hs_2	MdCA_48hs_1	MdCA_48hs_2	Notes
	Wnt1	XLOC_015404	3.28504	4.5976	0	0	0	0	0.0616673	0	0.051807	0.210071	1.88822	1.9285
	Wnt1b	XLOC_015382	7.21175	8.80317	0.310914	0.301141	0.24214	0.452934	0.4557	0.439875	0.255224	0.361015	3.39144	3.74543	TCONS_00027333+TCONS_00027334+TCONS_00027335 only
	Wnt2	XLOC_031686	1.47903	1.16173	0.156528	0.151649	0.569043	0.532209	0.0892433	0.129216	0.224921	0.304008	0.945892	0.500924
	Wnt3	XLOC_001931	18.4335	20.9669	0.286738	0.312527	0.394958	0.0997094	0.0919585	0.384648	4.01725	3.86352	11.1907	11.5031
	Wnt4	XLOC_041060	9.03552	8.81283	0.505311	0.571156	0.153084	0.312383	0	0.139047	0.13415	0	1.67394	1.96363
	Wnt5	XLOC_000650	1.89302	1.64473	0.155821	0	0.49233	0.288985	0.533042	0.128633	0.111953	0.113488	0.575435	0.495308
	Wnt5b	XLOC_030003	11.6597	10.5771	0.269567	0.243962	0.406806	0.411402	0.351268	0.482766	0.642462	0.972915	4.1913	5.88888
	Wnt6	XLOC_035748	10.2575	11.1163	0.672475	0.651516	21.1876	16.1716	18.8253	23.9079	26.3479	32.7826	15.5927	16.8169
	Wnt7	XLOC_034538	8.14003	9.22811	0.288402	0	0	0	0	0.173649	0	0.182338	1.47208	1.89476	TCONS_00054826 only
	Wnt8	XLOC_045775	0.784967	0.449045	1.84838	2.00455	5.0181	4.49643	4.44008	5.12068	5.68531	5.86414	6.97343	5.98312
	Wnt11b	XLOC_031913	17.8086	24.5265	3.67639	3.28782	0.899579	1.37675	1.08834	1.34237	3.09853	3.85835	11.3425	9.35456
	WntA	XLOC_006909	11.6981	11.8428	2.18165	1.95994	1.48318	1.80235	2.34942	2.06904	1.62885	1.8847	3.22267	2.88979
	Fz1	XLOC_044260	28.5941	28.3955	68.0356	64.9476	117.428	107.136	73.2918	62.1415	51.6843	52.9616	47.484	42.6113
	Fz2	XLOC_039886	2.43951	2.91962	0.237572	0.157937	1.27416	0.670975	0.667574	0.532323	1.62742	1.8383	4.23874	3.39244
	Fz3	XLOC_010791	52.1816	50.8596	11.0626	9.85273	16.1861	14.5365	15.7399	16.0943	23.7375	18.6435	21.5842	25.3105
	Fz4	XLOC_002646	25.6299	24.468	49.5595	45.3835	26.0957	30.1166	20.6222	19.9038	16.7732	15.6593	41.2329	49.812
	TCF	XLOC_007658	44.0133	43.4666	22.8917	25.8779	62.8007	51.1181	34.985	35.7175	40.4008	40.152	47.6245	50.6151
	Axin	XLOC_011804	34.24	34.8898	10.2753	9.86894	9.20412	10.4069	8.63558	9.33795	19.0199	16.8653	25.45	26.8064
	b-catenin	XLOC_011128	108.73	113.697	121.079	120.032	306.383	289.311	186.431	151.892	129.359	159.935	190.354	184.043
	Bra	XLOC_044272	53.1917	63.4702	0.905971	0.723132	1.56545	1.96991	0.602622	1.13569	9.61904	8.62046	36.9039	37.8519
	Bra2	XLOC_016911	38.4869	41.0576	0.053169	0	0.0483227	0.0493035	0	0.0877836	2.78862	1.78132	14.6012	14.0741
	Gsc	XLOC_010754	6.01048	7.03516	0.229418	0	0.0436471	0.089356	0.206473	0.0396449	0.242025	0.175279	2.04178	1.78141
	znfO	XLOC_009061	13.099	13.3214	0.151203	0.0538547	1.23018	1.10239	0.850547	0.780096	6.65707	4.89184	10.8169	8.05666
	FoxA	XLOC_044586	237.438	240.918	3.22397	3.40321	13.0324	12.6276	8.84769	17.637	30.6999	27.7917	64.7796	70.2531

## Sheet: Infos samples
	sample_title	tissue_fragments	raw_reads	clean_reads	%_clean_reads	mapped_reads	mapped_reads	sample_description
	MdCA-ND-1	30	24136216	24088320	0.998016	17700291	0.734808	Jellyfish umbrella central area including the manubrium - biological replicate 1
	MdCA-ND-2	30	24136618	24091386	0.998126	18143354	0.753105	Jellyfish umbrella central area including the manubrium - biological replicate 2
	MdCA-0hpd-1	150	24136607	24086420	0.997921	18180894	0.754819	Jellyfish umbrella central area immediatly after manubrium dissection - biological replicate 1
	MdCA-0hpd-2	150	24136980	24078710	0.997586	18771010	0.779569	Jellyfish umbrella central area immediatly after manubrium dissection - biological replicate 2
	MdCA-6hpd-1	100	24137209	24072872	0.997335	18534505	0.769933	Jellyfish umbrella central area 6 hours after manubrium dissection - biological replicate 1
	MdCA-6hpd-2	100	24137289	24072635	0.997321	18620543	0.773515	Jellyfish umbrella central area 6 hours after manubrium dissection - biological replicate 2
	MdCA-12hpd-1	100	24136631	24054288	0.996588	18184898	0.755994	Jellyfish umbrella central area 12 hours after manubrium dissection - biological replicate 1
	MdCA-12hpd-2	100	24136045	24089981	0.998091	18343627	0.761463	Jellyfish umbrella central area 12 hours after manubrium dissection - biological replicate 2
	MdCA-24hpd-1	60	24136419	24070148	0.997254	18195202	0.755924	Jellyfish umbrella central area 24 hours after manubrium dissection - biological replicate 1
	MdCA-24hpd-2	60	24136817	24075491	0.997459	18239213	0.757584	Jellyfish umbrella central area 24 hours after manubrium dissection - biological replicate 2
	MdCA-48hpd-1	50	24136886	24097751	0.998379	18105982	0.751356	Jellyfish umbrella central area 48 hours after manubrium dissection - biological replicate 1
	MdCA-48hpd-2	50	24137003	24023500	0.995298	18030414	0.750532	Jellyfish umbrella central area 48 hours after manubrium dissection - biological replicate 2

## Sheet: tpm_per_gene(XLOC)
gene_id	MdCA-ND-1	MdCA-ND-2	MdCA-0hpd-1	MdCA-0hpd-2	MdCA-12hpd-1	MdCA-12hpd-2	MdCA-24hpd-1	MdCA-24hpd-2	MdCA-48hpd-1	MdCA-48hpd-2	MdCA-6hpd-1	MdCA-6hpd-2
XLOC_000001	10.774	10.1919	11.1788	12.533	13.568	13.6386	13.7484	13.8091	13.4038	14.9431	14.2257	11.8146
XLOC_000002	2.53445	3.1214	2.35893	3.19106	2.00562	1.72704	1.74985	1.4868	1.78646	1.17455	2.26496	2.54558
XLOC_000003	70.2407	75.3748	75.1503	66.5653	65.0385	57.677	67.0293	60.0271	60.4702	62.9932	57.9499	65.9348
XLOC_000004	87.0148	83.8748	100.065	101.988	88.0717	113.655	71.6666	68.8019	26.5784	38.0684	62.7075	63.4684
XLOC_000005	17.342	16.2699	11.4929	13.1097	15.6902	17.7566	21.3125	22.3984	25.8714	23.4585	9.23154	10.5596
XLOC_000006	18.4461	19.801	12.4714	12.2175	12.5689	13.6251	20.6521	20.9016	26.8958	25.4347	7.83736	7.91044
XLOC_000007	2.67057	2.84771	5.3394	4.20305	56.2486	57.1987	25.3962	27.7939	3.66045	2.65315	100.533	90.0168
XLOC_000008	1.48427	2.05449	1.57888	1.03799	1.73693	2.04818	2.14721	1.83496	2.27169	1.89479	0.897128	1.04578
XLOC_000009	32.3457	32.4271	21.175	24.2341	41.0382	30.8277	37.6723	37.3175	45.4501	45.5035	26.8336	30.5831
XLOC_000010	5.77008	7.72656	6.79489	6.3405	7.20866	7.94081	6.48313	7.75115	9.48366	9.00324	6.17074	6.38947
XLOC_000011	4.04036	3.81245	2.24247	2.22995	2.44016	2.68568	3.50546	3.37573	4.63695	4.48163	2.23129	2.70404
XLOC_000012	7.61456	6.35577	3.35906	3.96184	2.24821	2.23042	4.93169	4.68023	5.78561	6.10932	3.51746	2.64085
XLOC_000013	0	0.486498	0	0	0	0.888016	0	5.80607e-05	0	0	1.18305e-06	0
XLOC_000014	4.44183	2.53738	3.34439	2.74565	5.89635	1.6093	6.48156	6.12324	2.52507	2.57893	3.4179	4.84712
XLOC_000015	0	0	0.0995701	0	0	0.0821965	0	0.0725193	0.200566	0.204844	0.180989	0
XLOC_000016	0	0	0	0	0	0	0	0	0	0	1.07716	0
XLOC_000017	9.88889	8.97869	10.1564	13.1623	17.5129	14.2442	19.8425	19.4647	17.4687	18.9392	17.7551	17.1959
XLOC_000018	2.61188	2.60774	3.77992	3.1727	7.37657	4.95859	4.08533	4.50987	5.09703	3.78864	8.9515	5.2729
XLOC_000019	4.84554	5.8851	5.40932	4.73229	6.99243	6.4564	5.36852	5.73913	6.96929	6.8028	6.28903	6.74019
XLOC_000020	1.0205	0.738868	0.0842148	0	0	0	0	0	0	0	0	0
XLOC_000021	0	0	2.09619	0.7747	0	0	0.0419168	0	0	0.090794	0	3.97951
XLOC_000022	7.08407	8.06671	10.2412	9.47304	6.65797	8.45425	10.3211	10.5302	11.3568	11.3766	8.17057	8.98097
XLOC_000023	10.3114	13.8691	8.88889	11.6619	8.07702	7.9494	7.71689	9.30637	13.8018	10.5404	7.74207	9.10125
XLOC_000024	42.9724	51.533	57.9639	51.0692	37.9792	37.0539	32.3693	28.877	29.1591	27.1935	44.702	48.5078
XLOC_000025	0.5322	0	0	0	0.449575	0	0	0	0	0	0	0
XLOC_000026	6.00605	6.04653	0.0992064	0.0768915	0.0339371	0.0655171	0	0.0144509	0.0799334	0.0408192	0.144262	0.0919938
XLOC_000027	6.38588	6.2917	0.2052	0.127507	0.0877449	0.0932544	0	0	0.0793856	0	0.279745	0.438545
XLOC_000028	6.64893	5.28218	2.97834	2.41732	2.16309	1.75524	3.3893	2.92064	2.5097	2.51541	1.62497	2.05932
XLOC_000029	0.53059	0.408354	0.14572	0.141178	0.172533	0.280685	0.193261	0.128146	0.195684	0.339662	0.0441458	0.0450418
XLOC_000030	7.51452	7.43025	20.1411	20.6943	9.34013	12.5254	10.5402	11.9072	8.87495	7.49154	12.3085	13.4094
XLOC_000031	8.96719	8.96435	37.2013	13.7302	18.18	16.0863	16.5459	18.0631	14.2734	10.9334	22.5403	31.2113
XLOC_000032	5.30408	5.6757	14.7346	13.1178	18.0565	16.5188	10.574	10.9323	7.90333	9.00764	17.8602	18.8789
XLOC_000033	2.82103	2.97461	0.101324	0.245415	0	0.0836446	0.109197	0.10016	0.361795	0.312679	0.124987	0
XLOC_000034	5.92238	5.97379	4.49059	2.95862	5.06676	3.29859	5.57503	5.50589	5.89628	6.07887	3.99904	4.0532
XLOC_000035	3.47216	3.1436	1.8119	2.0062	1.16217	1.38891	1.02284	1.084	1.30348	1.02065	1.23506	1.44014
XLOC_000036	0.978664	1.37279	0.68028	0.480639	0.288747	1.32752	1.43124	1.41751	1.78569	1.05949	0.0479098	0
XLOC_000037	40.91	43.0277	49.6491	44.6456	58.2146	57.4964	51.4693	59.2456	51.7912	47.482	44.4328	42.9485
XLOC_000038	8.99903	9.86119	4.44445	5.46521	3.36238	3.1045	5.459	4.233	4.93537	4.57175	2.95183	3.32876
XLOC_000039	3.85646	5.14032	5.07902	0	1.08591	2.0964	0.912279	0.924793	0.852564	0	0	0
XLOC_000040	2.49774	3.57775	1.25523	2.34834	4.21991	3.60886	2.86101	2.86873	0.900934	1.09824	2.95038	2.44835
XLOC_000041	37.2115	44.0789	66.2756	54.2118	90.7043	82.2398	59.2892	64.9336	68.4909	62.8671	115.71	113.316
XLOC_000042	0	0	0	0	0	0	0	0	0	0	0	0
XLOC_000043	0.461834	0.692154	0.243228	0.377894	0.167215	0.250986	0.21844	0.203963	0.0408283	0.166797	0.693704	0.394704
XLOC_000044	3.68173	0.855816	0	0	0	0	0	0	0	0	0	0
XLOC_000045	2.56485	2.77193	0.410831	0.630209	0.0878371	0.0565245	0.0737923	0.0997395	0.666634	0.328688	0.124462	0.190481
XLOC_000046	55.8208	56.0649	36.2547	32.4657	58.6927	42.4935	54.5178	53.1622	59.1432	54.8937	59.9888	56.9948
XLOC_000047	5.40332	4.45326	2.04879	2.57454	1.87071	2.05517	5.80281	4.32879	4.40104	5.62519	2.06784	3.1259
XLOC_000048	10.0787	10.8496	8.46585	6.05137	5.67773	4.60559	5.17392	6.00619	8.93825	5.75611	4.13471	3.80265
XLOC_000049	21.3462	21.7662	10.9079	13.673	6.70795	8.47088	10.382	11.4868	15.5164	14.4207	6.28549	7.8208
XLOC_000050	9.22815	10.7003	46.9678	39.8445	102.12	97.8216	69.3807	71.114	32.3166	37.5321	77.2578	79.1348
XLOC_000051	18.3594	17.5967	17.7608	20.6487	26.3814	24.0762	28.4762	28.3222	26.7378	27.5645	18.5207	23.4041
XLOC_000052	1.89293	1.48418	1.31984	1.56286	1.9753	1.48299	2.6604	2.04808	1.62468	2.71528	0.855796	1.0199
XLOC_000053	2.82413	2.46128	2.64651	2.07894	2.07982	2.30283	3.95704	3.33409	2.97763	3.4826	1.17014	1.26021
XLOC_000054	0.150211	0	0	0	0	0	0	0	0	0	0	0
XLOC_000055	0	0.205307	0	0	0	0	0	0	0	0	0	0
XLOC_000056	0.133409	0.133366	0	0	0	0.108783	0	0.0959757	0	0.180734	0	0.122196
XLOC_000057	0	0.321814	0	0	0	0.131247	0	0.347385	0	0	0	0
XLOC_000058	76.6646	85.001	1.37684	1.33393	0	0	0.989219	1.00279	12.0181	10.386	0	0
XLOC_000059	9.04894	4.53956	28.4591	20.7397	8.51714	18.2689	7.15547	9.94444	13.6819	8.92402	17.0264	9.10434
XLOC_000060	0.471709	0.133489	0	0	0	0	0	0.113484	0	0.0186523	0.250426	0.115589
XLOC_000061	1.84312	0.952197	0.255963	0.247985	0	0	0.0757824	0	0.0708219	0.17553	0	0
XLOC_000062	2427.21	2789.77	2600.4	2118.53	2132.15	1702.78	1840.06	1726.86	1484.37	1445.23	2172.17	2491.6
XLOC_000063	322.581	319.604	0.447837	0.289253	0	0.123232	0.107252	0	14.2974	8.87631	0	0
XLOC_000064	7.15149	7.10397	13.3679	11.0887	14.4912	16.7561	11.2426	11.1363	7.9851	6.86773	6.46073	6.26019
XLOC_000065	5.24641	6.41957	29.0618	26.7301	15.1216	18.1387	24.0373	21.5137	10.7448	8.78489	26.281	27.9677
XLOC_000066	2.05855	1.98656	9.2215	9.20734	6.61769	7.80907	5.74888	5.59152	5.23137	5.53067	5.93146	6.92843
XLOC_000067	3.78349	3.82281	4.65195	3.45559	8.04742	5.16431	3.92065	4.12137	10.0052	8.28018	8.06814	6.50053
XLOC_000068	0	0	0	0	0	0	0	0	0	0	0	0
XLOC_000069	6.56367	7.32456	5.05097	5.55089	4.7065	4.79199	9.47865	7.57712	5.71987	6.82414	4.45355	4.82357
XLOC_000070	4.23546	6.33589	1.61372	2.412	0.726807	0.864888	0.761705	0.29383	1.20212	0.85435	0.791697	1.29741
XLOC_000071	0	0.512735	0	0	0	0	0	0	0	0	0	0
XLOC_000072	44.3886	35.0036	26.7848	27.5968	33.4516	42.9584	43.5615	39.7528	41.101	36.8864	33.3133	25.1522
XLOC_000073	3.00956	3.41049	0.693524	0.686057	0.892129	1.27581	1.20219	1.10631	1.27973	1.23992	0.866244	0.93655
XLOC_000074	7.76387	8.90202	4.33895	3.32387	4.65999	5.91425	3.2624	4.63001	5.55568	4.77462	3.57663	3.74279
XLOC_000075	5.25537	4.17871	8.68155	7.34535	9.62282	9.06348	9.98129	10.1543	6.55104	7.23665	10.6178	9.16222
XLOC_000076	0	1.02573	0.6528	1.15525	1.686	3.30584	1.7864	2.59522	1.40111	0.586807	6.19126	8.63804
XLOC_000077	1.67634	1.08241	2.18642	1.93137	0.739991	0.707116	1.54777	0.973423	2.15311	1.57195	1.35105	1.76726
XLOC_000078	2254.23	2290	1470.49	1480.84	1338.38	1217.4	1229.26	1273.43	1235.39	1214.04	1373.12	1454.08
XLOC_000079	78.3461	71.2928	35.1511	39.6656	66.381	78.3177	83.8246	76.523	81.3889	88.46	49.8851	57.55
XLOC_000080	16.532	14.1479	13.3932	16.2742	13.9599	20.3268	21.703	21.6463	22.8971	21.8476	8.86889	9.05118
XLOC_000081	90.7074	76.8252	0	0	1.76958	4.83682	4.41624	5.09396	6.10815	5.54762	2.82459	1.2378
XLOC_000082	40.2483	60.897	16.1172	13.5329	4.59454	6.20898	5.40424	4.58308	10.1003	8.84203	6.83579	3.98544
XLOC_000083	10.3973	11.6721	58.2323	53.7452	11.4095	12.3121	9.61454	9.4926	7.73897	5.83468	15.7297	18.5458
XLOC_000084	9.00181	10.2362	51.3881	51.1793	10.3421	13.523	12.0817	9.48984	7.95687	6.83173	14.3478	19.2189
XLOC_000085	0.156789	0.300943	0	0.0366322	0.225954	0.146523	1.0164	0.43939	0.305989	0.57657	0.0811203	0.123054
XLOC_000086	5.33198	7.3084	13.0263	15.3539	141.776	49.0253	50.9275	63.9168	102.706	93.1195	73.1528	52.2763
XLOC_000087	0.671639	0.258241	4.95013	5.29471	4.58257	4.80258	4.25315	4.38583	3.20095	2.02977	5.10188	4.25899
XLOC_000088	437.333	480.115	261.96	273.251	151.494	148.987	231.079	194.577	270.491	264.205	171.608	167.893
XLOC_000089	0.490046	0	0.242024	0.468962	0	0	0.521661	0.176272	0	0	0	0
XLOC_000090	10.6638	11.2258	57.4824	50.7071	80.5635	88.4872	67.2063	66.9058	33.5056	40.358	58.6721	47.1
XLOC_000091	3.68798	4.80013	2.71741	4.42276	4.79769	4.48257	5.00635	5.55125	7.60766	6.71885	5.62051	5.79077
XLOC_000092	5.85735	8.78324	4.62853	3.46079	7.35317	6.68661	9.31128	7.33209	8.85718	8.01454	8.31469	7.7734
XLOC_000093	6.07434	4.27318	0	0.215296	0	0	0.31932	0	0.149209	0.152392	0.403934	0
XLOC_000094	441.208	461.079	263.153	274.148	184.526	165.738	213.913	211.424	203.244	203.331	185.693	188.088
XLOC_000095	0	0	0	0	0	0	0.100214	0	0	0	0	0
XLOC_000096	0.262571	0	0	0	0	0	0	0.188897	0	0	0	0
XLOC_000097	16.4563	14.6533	24.8452	23.5532	28.4614	28.6351	23.3874	29.5751	20.2521	24.1828	24.2802	25.4399
XLOC_000098	20.4854	20.0275	31.1938	33.112	34.5097	33.1498	29.8962	30.6988	27.3021	28.6886	39.855	39.3822
XLOC_000099	7.99498	9.74235	3.39506	3.51816	3.05643	3.28333	4.52524	3.56279	4.08145	3.78802	1.51923	1.71048
XLOC_000100	4.98558	7.1657	3.03255	2.88542	2.38659	1.73803	3.41809	2.30708	3.61298	3.34714	1.76581	1.39833
XLOC_000101	0.846062	4.22897	1.67142	0	1.42942	0.691309	0.60043	0	0	0	0	0
XLOC_000102	5.28458	4.38095	3.69213	3.08367	0.76217	1.1561	1.92091	2.50362	2.13711	2.00808	1.1571	1.4167
XLOC_000103	0	0.426587	1.13267	0	0	0	0	0	0.365758	0	0	0
XLOC_000104	155.421	163.803	149.738	150.468	151.933	122.961	134.829	135.934	133.552	125.832	146.779	147.756
XLOC_000105	16.4135	16.5307	0.228174	0.0928469	0.137589	0.0751707	0.131074	0.179211	0.867899	0.68127	0	0.113354
XLOC_000106	3.58254	3.22525	20.2199	22.0121	3.22415	4.16838	3.31571	4.26018	2.53969	2.50976	7.84984	8.00593
XLOC_000107	8.61282	8.78462	29.0862	30.0174	32.3447	36.9182	24.7384	25.2862	21.4192	23.2968	39.2868	39.3379
XLOC_000108	2344.79	2432.25	2291.35	2225.87	1971.18	1921.27	1820.21	1743.93	1650.9	1674.2	2093.26	2076.36
XLOC_000109	0	0	0	0	0	0	0	0	0	0	0	0
XLOC_000110	15.1279	11.1083	12.6982	12.9008	6.69385	6.81621	6.56253	6.29407	6.24236	6.15696	5.62048	5.58063
XLOC_000111	19.76	21.0792	3.89453	4.15405	2.94847	3.37439	3.49653	4.22437	5.37246	7.17446	2.04201	2.2908
XLOC_000112	43.067	36.4611	81.4094	71.534	120.513	87.3453	65.7246	75.9326	40.5207	41.02	86.744	73.6549
XLOC_000113	0.167495	0	1.81989	0.801441	0	0.136577	0	0.361492	0	0	0.751823	0.460249
XLOC_000114	1.8748	1.49936	0.37037	0	0	1.22298	0.2661	0	0.994726	0.507972	0	0
XLOC_000115	0.177942	0.178118	0.108366	0	0.0677205	0	0.123124	0.0476266	0.272412	0	0.120314	0.105697
XLOC_000116	1.93498	2.44504	2.69602	2.24505	2.1825	2.91713	2.14902	2.57905	2.68689	2.68394	3.47985	3.12258
XLOC_000117	76.3238	66.1822	38.8359	37.5275	37.7391	41.6726	54.2843	47.4911	55.9881	61.4436	36.2405	39.8938
XLOC_000118	13.4853	12.6675	23.9995	23.3906	24.281	27.3717	22.4405	22.2047	18.7357	19.47	38.171	41.794
XLOC_000119	0.259134	0	0	0	0	0	0	0	0	0.351059	0	0
XLOC_000120	2.10098	2.0789	0.15453	0.388599	1.18019	0.745867	1.2378	0.803518	3.07779	2.41306	0.847133	0.65338
XLOC_000121	51.0284	49.6154	0.118519	0.0574123	0	0	0.0851519	0.04316	0.039789	0.0907338	0.0538579	0
XLOC_000122	33.9451	47.0866	55.792	49.8037	49.7894	55.3714	40.7553	51.154	41.0705	37.2282	47.6319	55.2649
XLOC_000123	2.06766	1.556	4.5953	4.45208	61.7878	47.4186	34.1163	34.9562	4.45679	9.97906	34.5717	13.4938
XLOC_000124	0	0	0	0	0	0	0	0	0	0	0	0
XLOC_000125	0	0	0	0	0	0	0	0	0	0	0	0
XLOC_000126	0	0.0402521	0	0	0	0	0	0	0	0	0.0359647	0.0449179
XLOC_000127	13.3221	13.583	3.89036	4.34863	4.79482	5.67429	7.66635	7.6755	10.5318	10.7339	2.96716	4.13383
XLOC_000128	16.3325	19.4006	18.5013	17.2238	19.9513	19.1219	21.5428	22.5606	20.2164	21.8689	19.0228	20.3457
XLOC_000129	93.1045	99.8666	0.378068	0.366285	0.202081	0.0780251	0.577214	0.137678	16.6589	14.5188	0.128853	0.219113
XLOC_000130	17.3077	19.6839	99.3119	94.8882	41.8606	60.5821	41.8905	39.0928	32.0854	24.017	65.0691	90.7985
XLOC_000131	1.64771	1.3621	0.526536	0.241782	0.225151	0.206016	0.26481	0.334967	0.0837824	0.150245	0.0853382	0.341182
XLOC_000132	3.07576	2.99591	9.36046	8.09428	6.85158	6.8184	5.92495	6.09515	6.45311	4.73198	7.39076	7.63333
XLOC_000133	8.15286	6.92773	18.3879	20.7406	14.5203	14.9579	11.2825	12.4637	11.6254	9.02008	15.492	19.3535
XLOC_000134	40.3077	38.9173	44.2382	43.8485	37.6391	40.0776	38.548	35.7722	41.6608	43.0161	49.3812	45.9657
XLOC_000135	16.3128	16.3077	73.9742	78.942	154.443	113.663	83.711	75.7355	54.8588	47.8945	145.792	129.219
XLOC_000136	0.245631	0.245552	0.41015	0.235063	0.207496	0	0	0.17671	0.162908	0.499149	0	0
XLOC_000137	7.68927	5.7449	1.59898	0.929488	1.77771	2.83797	1.60835	2.03801	0.697854	0.767565	0.726619	0.593093
XLOC_000138	28.6984	30.5914	58.8838	55.3028	13.0924	20.1001	19.1286	17.6654	18.9616	16.8143	17.9347	24.1087
XLOC_000139	9.14438	8.48395	8.69637	9.76367	8.67025	9.32025	11.4478	12.2744	37.9205	29.676	13.0991	14.4975
XLOC_000140	4.681	4.44887	5.76098	5.17465	5.07876	5.29526	6.14301	5.84261	5.33384	4.9581	6.43616	6.6321
XLOC_000141	25.2282	28.9552	28.3176	27.966	20.749	21.4366	27.6046	23.0666	21.6632	21.8266	17.368	21.007
XLOC_000142	16.3994	15.9754	18.5822	14.8287	12.9765	13.0155	13.5884	14.9396	15.9919	14.0227	17.6389	13.8601
XLOC_000143	5004.56	5972.08	3752.51	3269.61	2744.68	3112.65	2511.97	2643.71	2867.88	2650.36	2889.19	3154.39
XLOC_000144	5.64087	6.34333	7.1676	6.0606	7.63346	6.50932	4.8275	5.30584	4.62781	5.07952	7.49391	6.89482
XLOC_000145	7.07332	6.66042	2.90382	2.41863	0.905513	0.849963	1.65544	1.29192	1.4968	1.42157	1.29289	2.02467
XLOC_000146	0	0	0	0	0.517777	0	1.08747	0.220477	0	0	0	0
XLOC_000147	0	0	0	0	0	0	0	0	0	0	0	0
XLOC_000148	0.903985	1.77657	3.17912	1.97702	3.64877	4.54048	4.33783	4.29755	3.28636	3.56643	2.82041	3.24748
XLOC_000149	0.964211	1.02977	0	0	0.861996	0.319258	7.65751e-08	0.596121	0.417156	0.845129	0.515228	0.183197
XLOC_000150	8.48114	6.92769	8.40035	8.87331	12.7509	8.94534	8.80897	8.26403	10.0582	8.90264	7.35959	7.90172
XLOC_000151	0	0	0	0	0	0	0	0	0	0	0	0
XLOC_000152	0	0	0.850242	0	0.727138	0.701887	1.22174	0	0.570886	0	0	0
XLOC_000153	1.46878	1.12842	0.0355306	0.187957	0	0.218815	0	0.0199236	0.58261	0.981948	0	0.694705
XLOC_000154	0.0815635	0.0440164	0.0483773	0.117795	0	0.101935	0.0936567	0.0900641	0.0629873	0.17661	0.191052	0.0771588
XLOC_000155	0.185567	0.301887	0.299652	0.403847	0.24207	0.233403	0.087612	0.134329	0.25036	0.261745	0.247423	0.213817
XLOC_000156	0	0	0	0.928729	21.3151	7.12209	4.13237	6.98176	8.3674	9.86063	7.84107	7.1113
XLOC_000157	0.397547	0.794842	0.392682	0.380443	0.671654	0.648329	0.56426	0.286	0	0	0	0
XLOC_000158	2.75841	3.19659	0	0	0	0.118876	0.206923	0	0.501206	0	0.130877	0
XLOC_000159	5.74111	4.43136	2.03821	2.14217	2.33121	2.15099	1.40773	1.76259	2.22749	1.81484	2.92871	2.18379
XLOC_000160	0	0	0.665155	0	0.56885	0	0	0	0	0	0	0.616797
XLOC_000161	35.1484	30.8347	22.5314	19.9071	17.9361	11.6981	15.8827	13.6235	19.315	16.6173	14.5533	14.9801
XLOC_000162	0	0	0	0	0	0	0	0	0	0	0	0
XLOC_000163	1.45515	0	0	2.78509	8.60464	0	0	3.14056	0.965089	2.95702	3.91899	5.33138
XLOC_000164	0	0	0	0	0	0	0	0	0	0	0	0
XLOC_000165	0.779824	0.850443	1.30322	1.31386	1.78958	2.78458	1.34106	1.21946	1.21113	1.80504	1.49206	1.90047
XLOC_000166	1.84073	2.2293	4.74555	5.67883	7.89821	8.03263	6.05535	6.96929	4.08789	10.9367	10.2847	8.91522
XLOC_000167	0.231825	0.231751	0	0.0554627	0	0	0.0411302	0	0.0768758	0.274805	0	0
XLOC_000168	0.791914	0.791663	0	0.757843	0	0	0	0	0	0	0	0
XLOC_000169	0	0.143834	0	0	0	0	0	0	0	0	0	0
XLOC_000170	0	0	0	0	0	0	0	0	0	0	0	0
XLOC_000171	0.959001	0.425408	1.43219	1.85151	4.19447	2.13503	2.87282	2.07444	3.27689	3.47054	3.17053	2.42058
XLOC_000172	0	0	0	0	0	0	0	0	0	0	0	0
XLOC_000173	4.28432	4.86397	1.06439	2.02826	1.16515	1.62242	1.23263	1.7526	1.39678	1.99729	2.09863	1.80694
XLOC_000174	0	3.43779	0	0	0	0	0	0	0	0	0	0
XLOC_000175	3.38928	4.32841	5.50861	6.26638	6.81198	4.04563	7.40866	10.1909	8.00571	4.53719	8.44729	5.61408
XLOC_000176	0	0	0	0	0	0	0	0	0	0	0	0
XLOC_000177	0.920831	2.76162	0	0.440606	0.388935	0.375428	0	0	0.305358	0	0	0
XLOC_000178	2.78581	2.41361	0.550344	0.355461	0.784436	0.605756	0.263603	0.668049	0	0	0.666908	0.340222
XLOC_000179	3.46751	3.1217	8.40706	7.27163	10.1391	8.57247	7.97795	9.07541	9.73388	8.84191	9.8321	8.88831
XLOC_000180	0.173361	0	0	0	0	0.141361	0.12303	0	0	0.11743	0	0
XLOC_000181	0.0975264	0.0974955	0	0	0	0.0795241	0	0.0701616	0.0646817	0	0	0
XLOC_000182	0	0	0	0	0	0	0	0	0	0.0601366	0.0797	0
XLOC_000183	0	0	0	0	0	0	0	0	0	0	0	0
XLOC_000184	0.386677	0	0	0	0	0	0	0	0	0	0	0
XLOC_000185	0	0	0	0	0	0	0	0	0	0	0	0
XLOC_000186	0.156877	0.627308	0	0	0.132521	0	0	0	0	0	0	0
XLOC_000187	0.379269	0.126383	0	0	0	0	0	0	0	0	0	0
XLOC_000188	0	0	0	0	0	0	0	0	0	0	0	0
XLOC_000189	0.180144	0	0	0.0861969	0	0	0	0	0	0	0.161721	0
XLOC_000190	0	0	0	0	0	0	0	0	0	0	0	0
XLOC_000191	0.71113	0.710904	0	0	0	0	0	0	0	0.192679	0	0.130272
XLOC_000192	0	0	0	0	0	0	0	0	0	0	0	0
XLOC_000193	0.118046	0.581421	0.574488	0.222633	0.393048	0.0948496	0.495302	0.669462	0.547932	0.318421	0.522124	0.653565
XLOC_000194	0	2.93964	2.90458	2.81405	4.96808	2.39777	4.1737	2.11548	1.95025	5.97555	0	2.69341
XLOC_000195	1.18787	0	0	0.378921	0	0.322868	0	0.569712	0	0.268209	0	0.362676
XLOC_000196	0	0	0	0.615229	0	0	0	0	0	0.333594	0	0
XLOC_000197	0.546902	1.64019	0	0	0	0	0	0	0.362718	0.740909	0	0
XLOC_000198	0.797916	1.51849	0	0.306571	0	0.0706864	0	0	0.951823	0.433995	0	0
XLOC_000199	1.43203	1.96842	6.18847	6.16689	12.5507	9.63349	2.15959	3.73455	0.949757	1.21252	13.0165	5.41063
XLOC_000200	1.5695	5.10696	1.66391	0.365754	1.69148	1.96986	1.20674	2.16118	1.20061	1.65027	5.83478	4.59542
XLOC_000201	3.09762	2.08084	3.89091	3.29347	6.53317	4.90044	5.71319	6.11997	4.76295	5.58618	7.00804	6.67125
XLOC_000202	2.31423	1.33008	1.35368	1.62299	0.499429	0.796859	0.888556	1.58088	0.646855	1.63271	1.49837	2.1914
XLOC_000203	2.17789	3.04696	2.17223	1.68602	2.15841	0.783288	0.926	1.21582	1.74665	1.32171	2.54361	3.26655
XLOC_000204	0	0	0	0	0	0	0	0.106448	0	0	0	0
XLOC_000205	0.182063	0.127109	0.7626	0	0.169498	0.19656	0.324754	0.526184	0.303857	0.230118	0	0.273884
XLOC_000206	8.1021	5.64009	16.5252	11.6983	4.16763	8.50233	2.77199	1.47594	4.56304	4.51648	10.1297	16.9792
XLOC_000207	0	0.492727	0	0	0.679845	0	0.571141	1.02743	0	0	0	0.368574
XLOC_000208	7.81494	10.4166	0	0	0	0	0	0	0	0	0	0
XLOC_000209	0.657299	0.525673	0	0	0.11105	0.107194	0.0932939	0.189147	0	0.0890469	0.118015	0
XLOC_000210	0	0	0	0	0	0	0	0	0	0	0	0
XLOC_000211	0.530936	0.541683	0.809149	1.22967	0.837043	0.668733	1.05972	0.918612	1.42643	1.23162	0.943442	0.841253
XLOC_000212	0.190243	0	0.0947942	0	0.081372	0.0781439	0.13772	0	0.0632057	0	0	0
XLOC_000213	0	1.35558	1.67881	1.25471	1.93958	2.35931	0.499665	0.492521	1.47474	1.33216	1.85456	0
XLOC_000214	0.521744	1.02088	0.234479	0.591099	0.501324	0.387132	0.103208	0.0853885	0.426419	0.278491	0.106553	0
XLOC_000215	0	0	0	0	0	0	0	0	0	0	0.0102144	0
XLOC_000216	3.84054	2.64297	6.38024	4.49519	2.64713	6.41786	2.66718	3.99747	1.98493	2.24272	2.72699	4.18744
XLOC_000217	2.37842	2.68223	0	0	1.63506	0	0.927397	2.64626	1.02535	1.44646	0	1.59841
XLOC_000218	0.802616	1.60472	5.02102	2.30425	2.26003	3.05416	2.84799	3.65693	3.37132	4.34934	3.60266	5.39114
XLOC_000219	2.04048	2.5629	3.15587	3.24516	3.04594	1.92183	1.58151	3.64186	3.05415	2.82557	4.38241	1.98886
XLOC_000220	1.03654	0.518104	0.511926	0.49597	0	0	0	0	2.53325	0.351059	0.930529	0
XLOC_000221	2.17763	1.27562	2.47934	1.94299	2.44151	2.7304	2.05275	2.69779	2.70865	2.25112	2.50804	2.86821
XLOC_000222	0.457876	0	0	0	0	0	0	0	0	0	0	0
XLOC_000223	2.45734	18.7206	0	0	0	0	0	0	0	0.299105	0	0
XLOC_000224	4.39715	0	0	0.56926	1.81839	1.28572	0.765642	2.89147	0.714147	3.49879	0.419228	0
XLOC_000225	0.39006	0.118741	1.03921	0.455385	0.187491	0.209446	1.13269	0.716435	0	0.300683	0	0.203294
XLOC_000226	0.994922	0.869295	0	0	0	0	0.153599	0	0.247276	0.42557	0	0
XLOC_000227	0	0	0	0	0	0	0	0	0	0	0	0
XLOC_000228	1.09988	0	0	0	0.99206	0	0	0.791263	0	0	0	1.00743
XLOC_000229	2.02992	0.474574	0.703437	0.340757	0.387274	0	0.505398	0	0.236158	0.723586	0.31966	1.63074
XLOC_000230	2.05277	1.82411	1.68971	1.41877	3.8535	2.23181	3.56108	3.9381	2.26908	2.47197	2.96901	2.29806
XLOC_000231	0	0	2.79365	0.902194	0.79639	0.768733	0	0	0.625256	0.638593	0	0
XLOC_000232	0.543897	0.543725	0	0.520496	0	0.4435	0	0.391286	0	0	0	0
XLOC_000233	0	0	0	0	0	0	0	0	0	0	0	0
XLOC_000234	1.19262	1.19224	1.17802	1.14131	2.01492	0.972475	1.69275	0	1.58194	0.807843	0	0
XLOC_000235	0.438977	0.438838	0.216802	0.42009	0.556237	0	0.467297	0	0.873418	0.743374	0.197041	0.60312
XLOC_000236	1.13906	0.839112	5.46376	5.50269	13.5151	10.0975	7.26666	8.64537	4.23369	4.5795	8.93587	8.8127
XLOC_000237	0	0	0	0	0	0	0	0	0	0	0	0
XLOC_000238	0	0	0	0	0	0	0	0	0	0	0	0
XLOC_000239	1.44372	1.88248	1.66027	2.00506	2.91355	2.58777	2.34499	2.34538	3.0251	2.63943	2.22027	2.34862
XLOC_000240	3.29964	3.2986	1.14319	5.20334	3.74395	3.15139	4.90681	8.73184	1.0942	1.67631	1.48109	4.53346
XLOC_000241	7.19922	6.1174	25.2445	30.3137	16.4201	17.024	12.7728	14.7607	9.0719	6.82714	24.5592	28.6844
XLOC_000242	0.28122	0	0	0	0	0.22931	0	0	0	0	0	0
XLOC_000243	0	0	0	0	0	0	0	0	0	0	0	0
XLOC_000244	11.4239	12.5204	12.8473	12.7778	7.29846	6.41077	11.0729	10.678	12.7817	11.0934	8.69655	8.53151
XLOC_000245	0	0	0	5.62811	2.48404	2.39777	2.08685	6.34643	3.9005	0	0	0
XLOC_000246	9.56416	8.19841	4.20188	2.73721	2.39178	3.37236	1.21018	2.52082	1.08507	0.788841	1.80285	2.43836
XLOC_000247	112.132	69.9998	95.3799	85.9829	93.9624	108.086	57.7314	52.5242	55.916	45.9008	162.937	119.145
XLOC_000248	0.315811	0.35079	0.311946	0.201482	0.0889269	0	0.0747079	0.100977	0.139635	0.0713069	0.126006	0.0964223
XLOC_000249	2.15194	2.08186	0.137136	0.166077	0.322521	0.254717	0.418743	0.499397	0.644549	0.822872	0.373908	0.317914
XLOC_000250	3.76688	4.0221	20.0624	19.7746	12.8327	11.5592	9.90853	9.8127	8.96874	6.78894	15.7959	15.1146
XLOC_000251	0.880963	0.623295	2.60355	2.52493	0.247399	0.597019	0.208531	0.105346	2.09875	0.892708	0.467374	1.20844
XLOC_000252	0	0.302725	0.60365	0.387309	0.363434	0.36908	0	0.163316	0.28908	0.191083	0.363508	0.201958
XLOC_000253	1.5599	0.926709	1.98126	1.73665	0.773856	1.23516	1.37708	0.860488	0.962543	1.10071	0.905921	1.33657
XLOC_000254	1.22205	2.44333	4.82839	1.16948	5.16163	3.98591	3.46905	3.51663	0	3.31113	0	3.35801
XLOC_000255	0	0	0	0	0	0	0	0	0	0	0	0
XLOC_000256	0	0	0	0	0	0	0	0	0	0	0	0
XLOC_000257	0	0	0	0	0	0	0	0	0	0	0	0
XLOC_000258	0.537985	0.179272	0	0	0	0	0.127265	0	0	0	0	0.164256
XLOC_000259	96.2903	83.3286	23.3062	25.6582	10.394	13.832	22.1836	20.961	41.3945	35.7931	16.3413	15.5305
XLOC_000260	0.151824	0	0	0	0	0	0.130658	0	0	0	0	0.151628
XLOC_000261	0.444158	0	1.79597	1.93353	1.18436	1.20339	0.235699	0.281904	0.904115	0.750911	0.612865	0.565389
XLOC_000262	0	0.123852	2.08038	1.89698	9.05305	7.11229	3.82945	3.08728	1.93898	1.09096	18.2895	16.1081
XLOC_000263	0.252782	0.252701	0.944267	1.29864	4.23692	3.14935	1.60726	1.44177	0.838434	0.563946	7.6408	7.10369
XLOC_000264	2.20624	0.87481	1.09371	1.29929	1.54462	1.20544	0.452989	0.60178	0.259259	0.189896	3.91286	4.63383
XLOC_000265	34.5391	31.3092	8.0277	12.4699	5.66394	7.23509	7.16641	6.44031	18.0893	17.6705	6.05783	7.92089
XLOC_000266	0	0	0	0	0	0	0	0	0	0	0	0.592609
XLOC_000267	9.53054	12.1438	17.915	16.192	54.0073	42.2747	27.194	29.6848	18.2813	21.1084	38.6334	31.0525
XLOC_000268	0.28492	0.12207	0	0	0	0	0	0.117128	0.0809851	0.0551417	0.0365401	0
XLOC_000269	21.9347	23.8699	18.0486	19.2988	16.5953	18.5747	17.8858	18.299	23.6117	23.6739	23.1076	26.0399
XLOC_000270	38.6317	42.1811	36.6753	34.9306	49.7772	43.52	40.9256	41.4368	38.9186	37.501	50.7041	49.3657
XLOC_000271	0	0	0	0	0	0	0	0	0	0	0	0
XLOC_000272	18.0568	19.4513	17.0084	15.9579	11.8754	12.0578	11.4242	11.867	18.7583	22.805	22.9419	23.1172
XLOC_000273	0.328868	0.821909	0.162422	0.403331	0	0.402244	0.23339	0.236591	0.327169	0.556913	0.147617	0
XLOC_000274	4.46659	5.19151	3.54922	4.68821	4.37156	3.03249	2.55678	3.32084	4.00746	3.35567	3.37768	4.07443
XLOC_000275	0.0941858	0	0	0	0.0795632	0	0	0	0.0624662	0.0637986	0	0
XLOC_000276	9.5223	9.66135	5.13693	5.84389	5.94291	3.63793	5.79955	5.52125	4.69248	7.15049	5.5501	7.22489
XLOC_000277	0	0	0	0	0	0	0	0	0	0	0	0
XLOC_000278	0	0.21342	0.622611	0.136202	0.273101	0.0397757	0.548331	0.445519	0	0.0812454	0	0
XLOC_000279	609.395	665.823	757.201	788.957	833.576	837.36	743.436	962.884	1298.91	1440.59	662.06	830.063
XLOC_000280	8.61405	11.5184	6.61726	5.80877	13.1428	17.465	18.2237	19.8149	23.7614	27.9978	11.2188	9.46777
XLOC_000281	18.7532	16.4871	12.6523	12.1235	12.139	13.7683	16.833	14.6959	15.4478	14.4789	13.1886	12.9474
XLOC_000282	5.52013	5.93077	7.36833	7.0673	10.0194	9.06318	9.37659	9.33778	7.52358	7.52886	9.17451	9.04728
XLOC_000283	4.44511	3.93097	7.00825	7.77149	5.77692	5.15808	7.09783	4.7968	6.00959	5.73245	7.21361	9.63066
XLOC_000284	34.8331	35.5011	26.7649	29.2895	36.3749	38.5583	43.0929	44.933	51.5354	52.1234	28.3909	29.1745
XLOC_000285	29.234	28.2797	25.159	25.3012	14.4365	17.63	15.443	15.7426	16.5591	15.0424	10.203	11.1957
XLOC_000286	2.1477	2.92775	2.69998	2.80267	0.329866	2.38808	2.77122	2.66877	3.62575	3.04182	1.22694	0.894173
XLOC_000287	4.48677	4.90584	4.84734	4.69626	2.01354	2.85825	2.78613	4.74087	6.32342	4.36885	0.755231	2.4401
XLOC_000288	9.46959	9.4489	8.09742	8.79388	3.47319	4.8336	7.08531	7.76149	12.8362	9.4846	2.56161	3.39063
XLOC_000289	0.0681744	0.204458	0.13468	0.391448	1.72771	1.40971	9.43444	6.08163	3.39111	3.89092	0.183606	0.153244
XLOC_000290	4.29982	5.04601	16.0655	15.3859	5.52735	6.63114	5.97028	5.24522	7.62529	5.88845	5.11879	5.22268
XLOC_000291	8.959	6.39542	1.88359	1.72526	16.0851	9.0011	6.64489	8.22507	14.9764	28.0344	6.96878	3.85847
XLOC_000292	0	0	0	0	0	0	0	0	0.0931233	0	0.12605	0
XLOC_000293	0	0	0	0.0603763	0	0.0514449	0	0	0	0.0427357	0	0
XLOC_000294	1.2938	1.00349	0.905097	0.777223	1.37624	1.54446	1.82523	1.90265	1.8986	2.00611	1.70468	1.12763
XLOC_000295	0.380728	0.761215	0	0	0	0	0	0	0	0	0	0
XLOC_000296	5.61877	6.24391	5.52406	5.01148	5.11146	4.32894	5.98678	5.64355	6.40745	5.04756	2.76808	4.91209
XLOC_000297	13.9519	14.7389	38.8643	35.1799	41.4538	33.0923	21.7977	23.5669	19.3059	18.0529	62.9632	61.0821
XLOC_000298	79.1468	70.6524	70.9109	68.0608	67.6124	64.3555	65.3454	72.6575	66.2434	71.4318	57.8426	47.3766
XLOC_000299	18.0035	28.1149	2.34829	2.26242	1.66203	1.93855	1.97806	2.06417	2.62722	1.88802	1.65588	1.83966
XLOC_000300	72.4128	68.1575	50.4889	57.1968	66.1047	61.9947	56.9917	55.8223	76.9813	70.345	50.7766	59.7823
XLOC_000301	10.1562	9.07001	8.96185	6.99786	5.14766	6.6252	14.7036	14.9053	19.3992	17.7033	4.25485	2.85279
XLOC_000302	5.47687	4.6717	5.01755	4.57956	2.65957	2.15688	7.35752	5.99426	10.7775	8.31284	1.46028	2.70258
XLOC_000303	2.78086	2.74387	2.26421	2.61539	4.50428	5.12434	6.27617	6.6722	7.04598	7.11364	7.66251	6.99548
XLOC_000304	3.08516	2.11427	0.656869	0.414317	0.70743	0.530848	0.515295	0.547177	0.889952	0.859532	0.396036	0.605647
XLOC_000305	7.46607	8.37183	2.43954	2.41784	1.15108	1.92128	0.543951	0.571836	0.884898	0.846086	3.13463	4.10832
XLOC_000306	0.338839	0.483902	0.478131	0.463229	0.163562	0.197352	0.30917	0.243764	0.417347	0.131154	0.34764	0.354696
XLOC_000307	24.2394	25.8158	0.392157	0.295505	0.244506	0.354022	0.13694	0.0317353	1.37506	1.37242	0.27721	0.265114
XLOC_000308	17.2828	27.9581	33.3847	30.2277	36.7289	21.4498	19.802	28.181	17.1133	27.369	19.272	28.7685
XLOC_000309	16.9284	13.5256	18.5341	22.3621	15.8615	19.6863	16.1755	17.7001	21.4629	22.2144	19.8418	19.7691
XLOC_000310	1.06133	0.848782	1.32789	1.45255	0.728113	1.92958	1.17633	1.81255	2.4865	2.54852	0.889257	1.03688
XLOC_000311	10.8532	13.3666	12.6212	13.5176	22.8872	21.3136	19.9282	23.2398	16.7847	18.8636	18.8676	15.4468
XLOC_000312	16.3054	17.2381	15.9427	16.638	32.2093	27.3829	24.1339	28.6004	21.0327	23.3774	20.0482	17.6909
XLOC_000313	2.97519	3.74535	5.51474	4.37754	4.80937	4.6124	4.06644	5.04708	3.58101	2.93587	5.01208	5.04652
XLOC_000314	14.1413	14.2484	7.84183	9.25936	14.2512	15.1732	23.971	17.4914	32.4146	31.4255	12.0941	10.0147
XLOC_000315	2.382	1.22302	1.85214	1.72835	2.73754	1.74069	1.16725	2.14676	2.27079	1.43689	0.993032	1.80888
XLOC_000316	5.05643	5.05482	25.549	26.4248	6.12524	10.936	5.1066	5.06187	1.4188	1.28416	23.2236	22.3844
XLOC_000317	3.34771	2.96831	1.21467	1.1441	1.09648	1.11411	0.932681	0.663484	0.747589	0.849904	1.1346	1.26807
XLOC_000318	58.3186	53.5537	26.9	29.2335	34.2051	38.3497	40.8787	41.7617	49.6697	44.6611	29.0321	29.129
XLOC_000319	334.537	389.13	315.507	312.386	214.122	253.083	230.996	208.371	233.142	269.054	267.716	274.292
XLOC_000320	0	0	0.997043	1.24304	0	1.34532	0	0	2.18848	0.851414	0	0
XLOC_000321	8.05425	9.07971	52.4174	51.5764	44.6745	54.5207	38.372	38.1714	22.3153	21.1532	41.8995	42.6223
XLOC_000322	1.34297	1.56224	5.52322	4.48649	4.26974	4.08164	5.68379	5.30504	4.25912	4.34996	3.6388	3.66792
XLOC_000323	0	0	0	0	0	0	0	0	0	0	0	0
XLOC_000324	0.379108	0.329311	0.271153	0.210162	0.185515	0.402914	0.350667	0.290248	0.139685	0.409082	0.113445	0.308661
XLOC_000325	15.469	14.6779	14.4799	15.1535	13.0338	14.6241	17.2121	16.1101	17.7382	18.4506	14.0271	12.7481
XLOC_000326	12.1781	12.1464	15.6242	15.8831	17.8031	17.7389	17.2556	16.6807	16.4306	18.0366	22.2333	23.0342
XLOC_000327	7332.35	7268.62	20.3103	15.9972	13.0859	29.0719	21.5434	5.59717	5.80501	6.16411	26.6908	15.5887
XLOC_000328	32.2048	33.8856	15.0999	16.3057	18.6734	15.7659	13.55	13.9533	16.6302	15.4644	12.4215	13.1164
XLOC_000329	10.1697	10.5349	34.6924	38.8756	16.8196	15.1257	14.5657	13.8585	15.6105	13.7513	31.0244	35.2848
XLOC_000330	4.02176	2.83927	1.46781	2.00782	0.587602	0.775756	0.849944	0.851262	1.43946	1.26086	1.21954	0.940638
XLOC_000331	83.8149	75.1369	40.5163	45.6067	36.8533	40.1168	53.7604	44.4341	48.1185	54.7661	38.5261	30.8384
XLOC_000332	13.814	10.2865	5.09919	6.43475	10.718	8.10077	16.5144	11.704	9.88513	13.0749	10.2449	9.8379
XLOC_000333	45.2376	52.1206	15.0231	19.6077	175.534	79.6107	59.4783	66.979	35.182	42.08	72.8157	46.2792
XLOC_000334	16.5311	19.6689	38.8086	40.263	99.2965	70.8033	35.3307	36.6046	23.8268	23.501	109.661	83.9183
XLOC_000335	456.309	505.363	238.33	238.344	405.964	329.26	377.7	332.123	367.997	376.901	628.482	580.031
XLOC_000336	0.237955	0.261667	0.282051	0.364348	0.462327	0.737319	0.455952	0.445087	0.45767	0.420014	0.576771	0.523091
XLOC_000337	4.56027	4.40162	2.79587	2.78397	3.32093	3.91083	5.63565	4.92106	6.57041	6.33775	2.54103	3.24075
XLOC_000338	32.1715	28.0381	6.68148	9.31515	2.648	3.49774	5.38586	4.39153	13.7869	11.5106	1.77731	3.32453
XLOC_000339	0.169357	0.169303	0	0	0	0	0	0	0.0561608	0	0	0
XLOC_000340	19.326	18.3634	6.99578	5.28657	34.2201	21.4394	16.0013	21.0926	39.1136	51.9302	19.1189	11.3989
XLOC_000341	53.5644	48.747	25.8543	24.3333	18.2312	20.4139	21.8631	21.7323	30.1032	29.6503	19.4618	20.8726
XLOC_000342	0	0.434026	0	0	0	0	0.154058	0.156171	0.287947	0	0	0
XLOC_000343	0.239974	0.119949	0	0	0	0.0978388	0	0.08632	0.238734	0.0812755	0	0.109902
XLOC_000344	0.935637	0.835939	0.598116	0.938198	0.535875	0.493754	1.06409	0.974966	1.68289	1.91292	0.451302	0.448988
XLOC_000345	143.864	147.385	2.48511	1.57592	0.888762	1.0444	1.88286	1.74415	6.189	6.50692	1.02663	1.17317
XLOC_000346	2.20103	2.04517	2.91627	3.10026	3.51714	3.72758	5.41838	4.78733	3.61577	4.42748	2.4171	3.73503
XLOC_000347	0	0	0	0	0	0	0	0	0	0	0	0
XLOC_000348	35.0253	35.2398	10.781	10.5961	18.4899	13.4488	17.232	16.9426	20.7046	19.9714	7.83604	9.94844
XLOC_000349	2.09496	2.23014	0.0764486	0.074066	0.13076	0.126219	0.054926	0.111359	0.205323	0.157277	0	0
XLOC_000350	45.9788	45.2888	39.6374	41.3158	57.4637	46.4662	43.1755	43.0734	43.2787	47.5621	66.1121	62.5601
XLOC_000351	13.8377	15.5416	4.611	4.98581	4.47152	4.31624	5.67918	4.79757	5.8603	6.74758	3.85396	5.00112
XLOC_000352	11.9034	13.3936	5.03904	4.98062	4.87535	4.1598	5.52202	5.22705	6.56178	5.58478	4.3947	5.38068
XLOC_000353	0	0	0	0	0	0	0	0	0	0	0	0
XLOC_000354	13.8018	10.93	15.691	16.3284	21.6636	17.4409	11.7028	14.3558	9.32976	13.8339	22.9982	18.0482
XLOC_000355	0.445751	0.440092	1.76874	1.18684	1.64416	1.76897	0.967042	1.35106	1.15207	0.948579	2.4126	1.6468
XLOC_000356	13.9665	13.0984	53.4717	50.9822	38.7976	47.7242	27.0783	25.4779	19.1457	16.4805	45.7577	37.453
XLOC_000357	1.8782	1.57984	0.121899	0.222773	0.166044	0.132488	0.126552	0.18927	0.165364	0.144936	0.0347927	0.250661
XLOC_000358	33.1978	38.8636	64.3989	59.9114	53.9123	51.4693	47.5538	41.4442	31.0987	36.142	60.5286	56.8153
XLOC_000359	0.437601	0.909136	0.451033	0.27571	0.389993	0.692498	1.26808	0.52447	0.874755	0.600954	0.37342	0.265498
XLOC_000360	0	0	0	0	0	0	0	0	0	0	0	0
XLOC_000361	1.58176	1.65676	0.910923	0.815099	0.936759	0.729798	1.16229	1.22902	1.51869	1.34128	2.2231	1.33703
XLOC_000362	0.74369	2.10445	0.757306	2.42308	3.17711	2.71961	2.07457	2.02023	2.21978	1.87893	1.79015	1.24453
XLOC_000363	4.65291	4.31081	4.86669	6.42552	6.11558	7.11395	5.04647	5.58951	4.94609	3.61221	4.14847	9.61215
XLOC_000364	6.21915	8.44092	7.17649	4.46453	7.30319	5.65272	5.25905	3.22426	10.6066	6.33503	8.68228	8.22631
XLOC_000365	0.441916	0.441776	0	0	0	0	0	0	0	0.598681	0	0
XLOC_000366	0	0	0	0	0	0	0	0	0	0	0	0
XLOC_000367	1.07974	2.86522	0.628382	0.514666	0.783885	1.06508	0	0.539549	0	0.550278	0	0.768119
XLOC_000368	0	0	0	0	0	0	0	0	0	0	0	0
XLOC_000369	2.87969	4.67801	2.13333	3.78921	3.34484	2.64165	2.2991	1.81272	5.25215	3.90122	6.46295	5.9347
XLOC_000370	12.445	1.67411	1.65414	1.60259	0	0	3.56535	5.41602	0.0506085	4.71683	7.1494	0
XLOC_000371	0.116851	0.497796	0.672163	0.503129	0.954067	0.494024	0.622958	0.843595	1.13602	0.694837	0.453016	0.76717
XLOC_000372	1.6472	6.5867	6.50815	4.72899	2.78293	2.68629	2.33795	4.74005	5.46229	1.11576	1.47874	3.0175
XLOC_000373	0	0	0	0	0	0	0	0	1.70251	0	4.609	0
XLOC_000374	0	0	0	0	3.81102	0	0	0	0	0	0	0
XLOC_000375	0.779443	1.04388	1.78508	1.21991	2.09629	2.75412	2.73891	3.17753	1.85777	1.51752	2.09919	1.29401
XLOC_000376	0	2.05817	3.618	2.55767	2.01205	0	4.05404	0	2.02774	1.99104	0	1.71745
XLOC_000377	14.657	13.6698	17.0793	19.4567	16.1447	15.7458	16.9513	12.9924	13.5832	12.3006	16.9319	14.4258
XLOC_000378	2.38906	2.3136	7.68396	9.13808	6.31698	4.19717	4.61567	5.25474	4.88927	5.21852	8.49154	8.35293
XLOC_000379	0.951993	0.319015	0	1.26293	0.780999	0.758722	0.655463	1.34198	0.615138	0.554087	0.574215	1.18281
XLOC_000380	0.999892	0.666383	0.658436	1.11635	2.25242	1.0871	0.827866	1.079	1.21578	1.12883	0.897632	0.91585
XLOC_000381	1.87263	3.04571	0.223919	0	0.147554	0.061616	0	0	0.180362	0.153555	0	0
XLOC_000382	0	0	0	0	0	0	0	0	0	0	0	0
XLOC_000383	3.85646	5.14032	5.97881	2.46036	3.25773	2.0964	2.73684	6.18753	5.96795	8.70749	6.92411	2.35488
XLOC_000384	0	2.69003	0	0	0	0	0.501788	0	0.937885	0	0.634754	0
XLOC_000385	0.802926	1.8162	0.3399	0.548843	0.616094	0.123751	0.703011	0.330076	0.266131	0.40739	0.670738	1.26075
XLOC_000386	0	0	0	0	0	0	0	0	0	0	0	0
XLOC_000387	12.2461	8.16147	9.07216	11.7192	6.89657	11.6499	4.34538	5.87331	4.73776	4.14756	7.32911	12.1515
XLOC_000388	0	0	0	0	0	0	0	0	0	0	0	0
XLOC_000389	0.0913747	0.0608972	0.060171	0.0582956	0.0257295	0.149016	0.043231	0.021912	0.101003	0.041263	0.109373	0.0557964
XLOC_000390	0.167328	0.496444	0.163508	0	0.141459	0.134978	0.237198	0	0.11146	0.112128	0.301818	0.153608
XLOC_000391	0	0	0	0	0	0	0	0	0	0	0	0
XLOC_000392	0	0	0	0	0	0	0	0	0	0	0	0
XLOC_000393	0	0.549766	0	0	0	0	0	0	0	0	0	0
XLOC_000394	9.89893	11.3802	10.7556	7.10478	5.01726	5.65019	7.72753	6.40926	6.89345	8.7168	4.44328	3.17342
XLOC_000395	2.86826	4.55824	5.52089	7.44952	5.63209	5.22822	3.75782	4.6007	3.70694	3.28785	6.52479	9.29594
XLOC_000396	3.14754	3.1854	6.31967	3.47124	3.75788	3.23716	1.87789	3.42312	1.75256	2.63237	5.76891	3.08944
XLOC_000397	1.15927	1.15324	1.34158	2.3316	1.36345	0.364955	2.21101	1.3045	3.08612	2.82482	0.987275	0.829527
XLOC_000398	0	0	0	0	0	0	0	0	0	0	0	0
XLOC_000399	0	0	0	0	0	0	0	0	0	0	0	0
XLOC_000400	0.394862	0	0.35895	0	0	0	0.261385	0	0	0	0	0.368419
XLOC_000401	0	0.318193	1.25759	0.609198	0	0	0.225885	0.228984	0.211099	0	0	0
XLOC_000402	0	0	0	0	0	0	0	0	0	0	0	0
XLOC_000403	25.7844	29.9713	1.65637	3.13099	2.52883	3.15204	0.57029	1.56739	5.30425	8.63471	1.61833	2.8517
XLOC_000404	14.4069	13.5893	15.6077	12.4528	13.0535	16.8634	15.996	13.0392	16.1048	19.2815	11.056	10.0034
XLOC_000405	7.06607	5.97215	6.47199	5.71702	11.9381	6.86173	7.24841	7.2092	9.15974	8.87649	9.05379	9.53173
XLOC_000406	0.778088	1.37062	0.600002	0.56728	1.10985	0.551533	0.391649	0.981004	0.526029	0.807967	0.924633	1.17398
XLOC_000407	4.67331	5.73361	0	0.406568	0.576653	0.367385	0.150752	0.305639	0.563536	0	0.204672	0.583707
XLOC_000408	0	1.05277	3.80092	3.29497	1.94706	0	1.85298	0	1.71266	0.000103532	4.97628	3.94213
XLOC_000409	4.10772	3.8257	3.67619	2.81975	2.18511	2.65987	3.65801	3.88895	2.99024	3.46912	2.56863	2.29455
XLOC_000410	2.8225	4.54778	3.2036	4.01966	1.72914	4.1727	2.62821	3.00945	2.96873	3.64841	4.22375	3.42822
XLOC_000411	0.141616	0.707853	0.419647	0.135523	0.478517	0.577375	1.00501	0.713159	0.845304	1.15111	1.39846	0.907988
XLOC_000412	0	0	0	0	0	0	0	0	0	0	0	2.78535
XLOC_000413	0.477057	0.238453	1.64926	0.228266	0.648127	0.388998	0.846389	0.3432	0.790987	0.646287	1.07067	0.21848
XLOC_000414	0.473633	0.236741	0	0.226628	0	0.579309	0	0.340737	0	0.160412	1.91337	0.867647
XLOC_000415	0	0	0	0	0	0	0	0	0	0	0	0
XLOC_000416	0.352617	0.541416	0.435892	0	0.440884	0.644122	0.370596	0.563434	0.231091	0.589212	0.468535	0.478044
XLOC_000417	9.24112	8.2119	11.8135	12.0041	11.7325	9.17213	9.92295	11.9561	13.3629	9.1992	12.08	12.6684
XLOC_000418	1.26029	0.235614	0.754499	1.99263	0.398195	0.845898	0.54772	1.6421	0.781571	1.23073	1.48109	1.04147
XLOC_000419	0	0	0	0	0	0	0	0	0	0	0	0
XLOC_000420	0	0	0	0	0	0	0	0	0	0	0	0
XLOC_000421	0	0	0	0	0	0	0	0	0	0	0	0
XLOC_000422	0	0	0	0	0	0	0.203624	0	0	0	0	0
XLOC_000423	0	0	14.5288	7.03798	6.21261	5.99686	15.6577	15.8725	4.8776	9.96329	0	6.73625
XLOC_000424	0	0.629089	0.395892	1.36928	0.786256	1.01877	0.639223	0.239509	0.731638	1.06767	0.79534	1.03796
XLOC_000425	1.11224	0.555943	1.64794	1.59658	0.46978	0.453466	0.394665	1.20024	0.737662	0	0	0
XLOC_000426	0	0	0	0	3.13987	0	0	0	1.59494	1.62896	0	4.40542
XLOC_000427	0	0.913048	1.26771	0	0.134164	2.2802	2.04481	1.63591	0.354287	1.0682	0.807079	1.05275
XLOC_000428	1.97979	0.659719	0.651852	1.46246	0	0.538113	0.468335	0.94952	0.43768	0.447015	2.36975	2.41784
XLOC_000429	0	0	0	1.02968	1.45569	1.68887	4.34189	0	0.713606	0	2.89778	5.71902
XLOC_000430	6.1174	6.52992	3.69264	4.08546	6.35931	2.70803	2.59825	3.82443	3.19729	2.13007	4.152	3.02588
XLOC_000431	0.28603	2.58852	1.22909	1.46557	1.47986	2.56941	2.0836	1.72427	1.40266	1.85648	2.3066	2.31765
XLOC_000432	0.443008	0.687208	0	0.482526	1.1614	0.280267	0.299859	0.921487	0.2499	0.393659	1.23677	0.987808
XLOC_000433	0	0	0	0.0937924	0	0.0799178	0.208664	0	0.0650019	0.132777	0.0879857	0.179543
XLOC_000434	6.65471	5.9782	2.22057	1.76874	2.5429	2.1687	1.2705	1.49942	2.45764	3.08788	1.08556	1.46191
XLOC_000435	1.67839	1.49506	0.375737	0.137081	0.0393592	0	0.0323127	0.069031	0.318993	0.440816	0.0430111	0.0428913
XLOC_000436	1.37788	1.88858	0	0	0.293439	0.323944	0.0463698	0.0735363	0	0.0442589	0.0586571	0.0903979
XLOC_000437	1.0089	0.259349	1.1909	0.735958	0.781701	0.552328	0.358208	0.503841	1.46209	0.357422	0.876713	0.680417
XLOC_000438	127.088	112.358	52.963	49.092	106.05	86.8128	109.766	93.8393	74.3713	78.5769	54.8467	59.7377
XLOC_000439	0.078188	0.0397936	0.0411958	0.153622	0.289617	0.0984543	0.0884035	0.301094	0.186279	0.192874	0.181776	0.15928
XLOC_000440	85.2239	84.5631	67.4566	67.422	65.903	62.1631	81.4311	81.0256	79.7986	82.2862	56.0008	53.2642
XLOC_000441	0.506428	0.377575	0.56293	0.432316	0.194094	0.366498	1.05624	0.372968	0.318879	0.514801	0.486787	0.315762
XLOC_000442	22.2807	23.9027	18.9059	18.912	16.4689	16.4768	21.5734	18.2245	18.8251	19.8889	12.0225	12.565
XLOC_000443	3.9568	5.28285	2.10737	2.50857	2.21436	2.28696	2.69194	2.90177	4.43258	3.03141	3.03376	2.82526
XLOC_000444	15.4022	12.8311	15.2137	19.6527	26.0219	29.3046	14.5741	24.0078	17.0251	13.9106	29.9585	21.1614
XLOC_000445	0.276531	0.252971	0	0	0	0.0891901	0	0	0	0	0.163199	0.100187
XLOC_000446	1.02051	0.510092	0	0	0.431036	0	0	0	0	0	0	0
XLOC_000447	77.9463	74.6782	0.691761	0.916154	0.404944	0.572461	0.172042	0.188771	0.304548	0.25939	0.572956	0.660941
XLOC_000448	53.7326	50.1397	28.7265	29.2451	14.5171	19.2757	14.3481	14.0973	14.6466	15.6965	18.2897	14.7435
XLOC_000449	11.3402	11.4365	10.2145	10.6371	6.98424	10.2246	16.592	12.2194	13.1204	14.6693	5.60595	7.9161
XLOC_000450	4.01308	4.05873	0	0	0.0198248	0.0382726	0.183204	0.0337667	0.638153	0.508695	0	0
XLOC_000451	0.484055	0.403251	0.0796885	0	0	0	0	0	0.0535061	0	0	0
XLOC_000452	0.309664	0.229003	0.028284	0	0	0	0	0	0	0	0	0
XLOC_000453	0.137868	0.241193	0	0.0329841	0	0.0562096	0	0.0743879	0.0228593	0.0233469	0.030942	0.03157
XLOC_000454	1.39529	1.76274	0.772954	2.4818	2.01175	1.70049	1.26454	1.86063	1.45539	1.67395	2.63182	0.632408
XLOC_000455	23.4235	21.1118	22.3984	21.4619	18.9976	20.7761	22.282	20.795	21.278	22.2804	18.1758	18.83
XLOC_000456	7.65852	8.68453	1.69361	1.20327	3.76584	2.33017	3.1637	3.9472	7.65686	8.43961	2.87325	2.93156
XLOC_000457	42.9755	40.8106	29.0708	33.616	19.2478	23.4822	24.4349	23.313	29.8456	27.867	16.8185	18.5512
XLOC_000458	0.35441	0.321235	0.266828	0.318679	0.453921	0.396323	0.49941	0.584745	0.465388	0.409479	0.798958	0.905006
XLOC_000459	1.28104	1.27742	0.714899	0.777837	1.25849	1.07343	1.15054	1.67594	1.11172	1.00403	1.52165	1.13374
XLOC_000460	611.485	659.537	1.89597	0.787233	0.926548	0.894371	1.36219	0	0	0.371481	3.20014	1.00464
XLOC_000461	2.08883	1.80503	0.314735	0.338807	0.478517	0.317556	0.301503	0.15282	0.328729	0.31176	0.349614	0.51885
XLOC_000462	74.8211	63.3642	5.98533	5.77288	8.5485	7.4795	5.40688	6.7162	4.3717	5.78115	7.8967	5.50084
XLOC_000463	10.0779	10.2561	18.9588	18.3677	14.106	14.9171	11.7148	11.6751	9.14482	8.55528	14.7462	18.4507
XLOC_000464	2.01557	1.97013	1.86552	2.04313	1.29647	1.50654	1.07808	1.00426	1.44635	1.08463	2.90304	3.535
XLOC_000465	96.6969	88.9579	143.956	136.412	73.3517	84.9653	62.0668	61.4189	83.2973	73.8752	119.797	119.556
XLOC_000466	0	0.119309	0.173256	0.52211	0.120208	0.166828	0	0.391871	0.00340018	0.128386	0.0929334	0.26113
XLOC_000467	0	0	0	0	0	0	0	0	0	0	0	0
XLOC_000468	0	0	0.351719	0	0	0	0	0	0	0	0	0.652296
XLOC_000469	0.175316	0.0534658	0.27488	0.0512712	0.361188	0.166427	0.281246	0.11349	0.175121	0.0815766	0	0.36178
XLOC_000470	8.50863	10.2294	0.164794	0.106439	0.046978	0.0906933	0.157866	0.120024	0	0.0753397	0.0998489	0.0509377
XLOC_000471	0.13977	0.257834	0.197022	0.382273	5.85752	4.94759	33.2349	17.2213	9.94822	14.6959	1.00547	0.554342
XLOC_000472	4.67949	4.31816	3.03187	5.14041	8.81821	7.50856	7.15276	5.52046	6.61609	3.6385	8.54996	9.84006
XLOC_000473	21.8471	22.3719	9.36149	9.34122	11.8842	13.0452	17.8165	19.1745	22.2897	21.9611	14.0249	11.9699
XLOC_000474	27.0734	28.1052	10.5318	8.37741	14.1152	15.7577	21.4738	20.7329	23.9577	25.2627	13.1212	11.0909
XLOC_000475	0.574851	1.14934	1.93057	2.3105	1.65105	1.12498	2.52934	2.72946	0.99126	1.7133	1.34176	0.842454
XLOC_000476	5.24629	7.4529	38.1838	38.0507	55.514	47.3945	32.4308	43.5031	27.561	27.6813	61.8464	61.4577
XLOC_000477	1.20106	1.17885	2.37272	1.54645	1.80782	1.38891	2.97553	2.49791	1.73797	2.18922	1.47031	1.34013
XLOC_000478	9.46318	9.08208	8.26724	11.0008	9.17069	9.99691	7.08766	6.1463	6.21586	6.53877	9.74547	7.75099
XLOC_000479	26.1602	28.5632	28.7563	32.2933	39.2083	38.8527	38.8163	34.1504	33.5338	34.157	33.2929	32.9488
XLOC_000480	46.045	40.6739	73.1727	79.1232	84.666	77.2821	60.4648	63.3849	67.3007	63.729	94.8055	74.8748
XLOC_000481	0.0378399	0	0.149507	0.108636	0.0639304	0.154276	0.0537082	0.0816674	0.100385	0.0256316	0.03397	0.0693189
XLOC_000482	0.172305	0	0.170196	0.0824459	0	0	0.244562	0.0619791	0.171415	0.175071	0	0
XLOC_000483	8.72933	8.2701	9.99085	10.4307	10.151	10.8687	10.0586	10.8416	7.94592	7.75717	11.4994	9.71896
XLOC_000484	6.20176	6.68338	7.4903	8.25362	8.12804	8.91945	10.657	9.46665	9.29929	9.52925	7.71401	7.92173
XLOC_000485	8.76698	11.067	2.22416	2.43376	2.77312	2.14201	3.21235	2.79439	5.80169	5.34592	1.60287	1.16748
XLOC_000486	1.32652	1.33536	0.45007	0.374085	0.330214	0.461135	0.161681	0.597812	0.518511	0.562876	0.613571	0.25371
XLOC_000487	12.6411	11.2884	5.42052	5.83023	10.2213	9.37969	10.6997	10.9874	15.2581	14.8485	7.20019	6.76635
XLOC_000488	0.839305	0	0	0	0.311357	0.103182	0	0	0	0	0	0
XLOC_000489	6.77363	6.47148	11.3912	12.1849	7.93113	8.98409	8.36675	7.83385	7.62006	7.25989	7.35094	8.71743
XLOC_000490	0	0.225417	0	0	0	0	0	0	0	0	0	0
XLOC_000491	0.993506	1.62522	0	0	0	0	0.0909389	0.129953	0.41931	0.244716	0	0.0827273
XLOC_000492	0	1.64844	0	0	0	0	0	0	0	0.376698	0	0
XLOC_000493	41.663	40.1736	4.06322	4.3908	6.638	8.21361	11.6023	10.3956	14.7603	18.7546	4.92382	4.5407
XLOC_000494	31.9161	31.851	0.922432	0.683404	0.464045	0.716688	0.350862	0.790388	1.67591	1.37677	1.18356	0.855369
XLOC_000495	30.3104	26.5796	0.161616	0.117434	0.172771	0.233479	0.174174	0.205991	1.08516	0.720397	0.330492	0.449599
XLOC_000496	13.9783	9.98134	17.4704	17.1989	20.9655	23.2614	24.9014	22.3698	22.5146	22.4152	17.1585	21.4261
XLOC_000497	6.99881	6.99659	10.0209	10.8556	17.0677	14.9566	14.3083	13.7039	11.2992	12.1347	13.4691	12.7819
XLOC_000498	11.2155	12.6622	0	0.30843	0	0.0610519	0	0.0742535	0.210725	0.328788	0.575813	0.553003
XLOC_000499	9.44101	10.5118	8.26449	10.225	8.78712	9.08124	13.8013	11.8758	10.5358	9.1139	8.72922	7.97432
XLOC_000500	5.49446	4.12575	3.03929	4.10257	4.08321	3.77859	4.00673	3.79672	3.30346	3.89594	4.50873	3.21043
XLOC_000501	0.030857	0	0	0	0.0260664	0	0	0	0	0	0.0277012	0
XLOC_000502	0	0	0	0	0	0	0.0442382	0.0896902	0	0	0	0
XLOC_000503	0.0469827	0	0	0	0	0.0323127	0.0281226	0	0.0262818	0	0	0.0362967
XLOC_000504	0.73813	1.30708	1.72919	2.26136	4.04451	3.17962	2.90554	2.32786	2.53157	2.17524	4.12785	4.74276
XLOC_000505	0.0832542	0.0832278	0	0.0796723	0	0.0678865	0	0	0	0	0	0.0762566
XLOC_000506	0.029865	0	0	0.269708	0	0	0.100554	0.0787394	0.197248	0	0	0
XLOC_000507	0.259726	0.441079	0.259269	0.3533	0.415438	0	0.562075	0.0996889	0.258038	0.518416	0.551425	0.930744
XLOC_000508	58.6109	61.8409	0.056846	0.0734813	0.105596	0.101933	0.694022	0.386322	5.29779	5.74926	0.134512	0.137264
XLOC_000509	0.514169	0.916984	0.718283	1.54213	1.8573	1.20275	0.741852	1.20464	1.09388	0.739023	1.26558	1.57019
XLOC_000510	0.161238	0.161119	0.159857	0	0.137324	0.0882387	0	0.0388898	0.107828	0.0729818	0.048549	0.0492053
XLOC_000511	0	0	0	0	0	0	0	0	0	0	0	0
XLOC_000512	0	0	0	0	0	0	0	0	0	0	0	0
XLOC_000513	23.7245	28.1896	110.571	125.096	157.569	195.3	78.6478	92.3897	90.4837	73.1135	215.016	257.098
XLOC_000514	5.97413	6.65456	4.12638	3.84042	7.25511	7.65251	8.11851	7.57163	9.66522	10.3602	3.10261	3.31273
XLOC_000515	16.0108	18.5842	28.1253	26.4151	23.4727	21.9224	22.3314	24.6508	19.4469	20.1884	29.187	31.5921
XLOC_000516	3.33092	3.75196	6.25593	5.88136	4.25118	3.09861	3.3627	3.30757	3.77198	3.74984	2.48487	3.43769
XLOC_000517	0.811966	1.14182	0.139483	0.607246	0.821915	0.827867	0.60043	0.973866	0.785579	0.458477	1.1393	1.08493
XLOC_000518	25.2542	22.6663	19.715	18.3463	18.9198	16.8348	17.339	18.8329	19.6834	19.1043	20.7684	17.5947
XLOC_000519	7.11687	7.44851	30.4684	28.4339	18.9951	22.6957	12.5469	12.0669	13.2695	12.1782	38.4532	48.0322
XLOC_000520	577.105	580.349	2965.78	2760.13	530.951	615.188	215.706	252.298	386.305	278.723	1213.73	1279.02
XLOC_000521	7.33045	8.80564	1.26969	0.95873	1.03596	0.801446	1.02679	0.984325	1.45989	1.45457	0.797697	0.790494
XLOC_000522	10.8417	11.7203	40.1002	47.9636	47.2756	32.9817	19.96	23.0988	22.4148	20.735	82.1527	100.714
XLOC_000523	0.043189	0	0.178474	0	0.0781503	0	0.216404	0.199665	0.367216	0.204512	0.249156	0.254212
XLOC_000524	0	0	0.272362	0.184711	0.12549	0.0224838	0.104202	0.372389	0.201162	0.168098	0.164605	0.25256
XLOC_000525	0	0	0	0	0	0	0	0	0	0	0	0
XLOC_000526	0	0.0336477	0.0664929	0.0644205	0	0.0274454	0	0.0968568	0.044646	0.0911966	0	0.0308293
XLOC_000527	0	0	0	0	0	0	0	0	0	0	0	0
XLOC_000528	0	0	0	0	0	0	0	0	0	0	0	0
XLOC_000529	1.77825	0	0	0	0	0	0	0	0	0	0	0
XLOC_000530	0.0981063	0.0490376	0	0	0	0	0	0.0352894	0	0.0332271	0	0.0449302
XLOC_000531	0.746615	0.800713	0.894695	0	3.89347	1.34122	3.50812	2.23737	2.05462	0.561437	3.93313	2.28223
XLOC_000532	11.7731	9.55223	11.5405	8.14625	7.55604	6.68842	9.0911	6.26489	10.4444	6.40191	3.15204	6.00342
XLOC_000533	0	0	14.3723	0	15.3642	29.6613	7.74452	15.7015	2.41253	9.85595	9.79669	6.66368
XLOC_000534	0.654528	0.893881	1.01038	0.719116	0.860562	0.788625	1.03798	0.944191	0.924607	0.989821	0.659508	0.641186
XLOC_000535	0.0391882	0.195879	0.154834	0.225013	0.298134	0.0958634	0.139144	0.197347	0.0780267	0.0796346	0.211082	0.215366
XLOC_000536	0	0	0	0	0	0	0	0	0	0	0	0
XLOC_000537	0	0.0664631	0	0.694262	0.206982	0	0	0	0	0.395102	0	0
XLOC_000538	9.27498	9.10345	0.166572	0	0.48716	0.343769	0	0.121319	0.335529	0.114229	0.0756947	0.0772309
XLOC_000539	49.4946	42.2665	1.76245	1.33632	1.57281	2.97312	2.31231	1.50688	3.24144	3.78352	3.41255	2.70018
XLOC_000540	5.098	8.03556	5.02239	4.29512	5.31785	5.12991	3.75425	4.28009	4.20365	5.46964	3.73869	4.54301
XLOC_000541	4.7758	4.70846	5.75373	3.32387	9.88475	7.2264	7.84688	10.1687	11.1604	8.40124	13.6416	13.9185
XLOC_000542	3.9009	6.34873	5.27796	4.04363	5.74908	5.74313	2.73733	3.8398	2.4266	5.20203	5.43552	3.06997
XLOC_000543	0.980482	0.763393	0.980759	0	0.240664	0.584527	0	0.670331	0.198055	0.44175	0.332396	0.767922
XLOC_000544	0.257115	0.257033	0.761905	0.738159	0	0.838618	0.182468	0.184971	0.341049	0.174162	0.692459	0.235504
XLOC_000545	0	0	0	0	0	0	0	0	0	0	0	0
XLOC_000546	1.03117	0.960875	1.55194	0.702909	1.98739	1.46764	1.3567	1.34208	0.868582	1.38736	1.16847	1.5138
XLOC_000547	0.191205	0.3984	0.10197	0	0.107287	0	0.0957865	0	0.132376	0.0790686	0	0
XLOC_000548	4.46075	4.32818	5.76688	4.45716	5.26441	5.13508	7.40212	5.80472	6.35201	6.17645	4.94679	4.68667
XLOC_000549	0.845938	1.69642	1.11746	0.655946	1.91134	1.38372	1.29863	0.813874	1.23697	0.766312	2.26775	1.55433
XLOC_000550	0.454079	0.453935	0	0	1.15075	0	0.644498	0.32667	0.602311	0.615159	0	0.415913
XLOC_000551	0	0	0	0	0	0	0	0	0	0	0	0
XLOC_000552	0	0	0	0	0	0	0	0	0	0	0	0
XLOC_000553	0	0	0	0	0	0	0.235739	0	0.220308	0	0	0
XLOC_000554	0	0	0	0	0	0	0	0	0	0	0	0
XLOC_000555	5.41732	3.44629	5.83748	7.06943	7.48844	6.69295	8.9706	6.14117	8.27454	8.33984	5.74752	5.26272
XLOC_000556	0	0	0	0	0	0	0	0	0	0	0	0
XLOC_000557	0	0	0	0	0	0	0	0	0.246812	0	0	0
XLOC_000558	0.919027	1.03142	0.220393	0	0.63358	0.553049	0.158292	0	0.29648	0.151724	0.200333	0.207004
XLOC_000559	1.34071	1.56367	1.10359	0.427677	2.26513	0.911027	2.37868	2.0898	2.66757	3.02719	1.2036	0.614012
XLOC_000560	0	0	0	0	0	0	0	0	0	0	0	0
XLOC_000561	1.71561	3.8085	0	2.32659	1.94495	1.87957	3.98531	0	3.37933	4.58858	2.17089	2.26209
XLOC_000562	0	0	0	0.393072	0.346975	0	0.291495	0	0	0	0	0
XLOC_000563	0	0.249894	0	0.478436	0.422328	0	0.3548	0	0.165788	0.338648	0	0.686887
XLOC_000564	3.82479	2.82217	0.134928	0.174297	0.307713	0.259898	0.193883	0.0982714	0.543576	0.277585	0.327012	0.417061
XLOC_000565	1.2968	0.864261	0.0346892	0	1.41267	0.352476	0.30677	0.621956	0	0.58561	0	0.395935
XLOC_000566	0	0	0	0	0	0	0	0	0	0	0	0
XLOC_000567	34.7449	44.6956	4.93263	4.65383	9.0717	6.97165	6.32321	6.28703	7.61201	5.94976	6.87884	6.9973
XLOC_000568	0	0	0	0	0	0	0	0	0	0.0798242	0	0
XLOC_000569	0.557012	0.85825	0	0	0	0	0	0	0	0	0	0
XLOC_000570	6.93749	6.13006	23.1587	26.8212	16.2445	15.1091	16.0582	10.6144	10.4495	11.3034	31.8318	34.1685
XLOC_000571	30.9162	31.4124	32.1224	30.466	30.6927	32.2149	36.6493	33.2301	35.8884	35.0516	34.6059	37.8512
XLOC_000572	62.9765	72.1752	78.7146	75.5068	97.458	89.9705	68.5143	78.0338	63.7386	72.2403	93.6557	99.7457
XLOC_000573	314.319	345.278	237.889	207.342	257.628	204.725	255.111	251.249	254.1	251.082	241.568	231.597
XLOC_000574	0	0.319219	0	0	0	0.146758	0	0.229723	0	0	0	0
XLOC_000575	49.8538	48.8012	7.89805	7.36216	10.0738	9.80563	9.88348	8.67165	9.95723	10.1362	6.64467	6.15023
XLOC_000576	4.46339	3.77761	6.60202	7.18849	3.49922	4.84155	4.75359	4.42094	3.97961	3.01197	3.79999	4.08452
XLOC_000577	62.645	65.2744	69.1061	65.6448	74.6228	66.0877	56.0633	59.0947	92.4227	95.7977	69.1172	70.1127
XLOC_000578	9.07092	7.48695	6.89223	6.09871	7.30897	7.51032	9.54057	9.2364	9.4097	10.6187	7.14098	5.92246
XLOC_000579	39.2356	40.7061	37.5645	35.7869	57.1449	48.9764	54.2244	55.8427	48.9527	55.8504	52.7507	45.1197
XLOC_000580	0.603983	0	0	0.137704	0	0.107062	0.267701	0.106108	0	0	0.282828	0.287405
XLOC_000581	8.19097	7.64592	2.83299	2.67055	2.31368	2.5494	2.82395	2.06337	3.75301	4.14811	1.34537	1.65668
XLOC_000582	66.5084	76.6924	52.3179	54.0424	43.9881	50.9526	64.4937	64.5624	73.7672	72.1976	54.2759	53.394
XLOC_000583	41.5567	39.826	15.0473	16.1127	6.13894	6.88863	4.14689	4.10663	3.53595	3.78202	8.38735	8.65221
XLOC_000584	14.5299	15.9182	6.68454	7.40334	2.85836	4.97719	4.66138	4.03388	7.61677	7.14565	3.27587	3.52467
XLOC_000585	91.8508	87.4774	120.201	112.958	98.2624	94.9804	91.7663	102.257	105.224	109.644	113.097	118.624
XLOC_000586	227.42	255.4	203.42	200.906	166.559	147.863	163.351	163.417	142.258	143.561	157.456	175.071
XLOC_000587	62.5975	65.1152	51.5165	48.9796	58.5511	56.2641	43.5747	49.1949	41.2147	43.8406	56.9667	54.1659
XLOC_000588	0	0	0	0	0	0	0.508133	0.505881	0	0.474212	1.67409	0
XLOC_000589	1.04199	1.30208	0.25731	0.498581	0.263788	0.424826	1.66382	0.937026	1.03661	1.76453	0.233857	0.238603
XLOC_000590	1.61982	2.51893	0.622222	0.344474	1.14029	0.293516	0.702503	1.81272	1.13399	0.670523	0.242361	0
XLOC_000591	224.751	228.953	0	0	0	0	0.15966	0	2.08892	0.91435	0.201967	0
XLOC_000592	0	0.0812802	0	0.550758	0	0	0	0	0	0.28437	1.05765	0
XLOC_000593	504.556	566.616	1.37684	1.33393	1.30658	0.630602	2.19532	1.88914	2.68031	5.32784	0.694262	0
XLOC_000594	284.693	299.002	0.497681	0.497471	0.922368	1.13257	0.885543	0.80015	0.612309	0.663767	1.53379	0.0899947
XLOC_000595	0	0	0	0	0	0	0	0	0	0	0	0
XLOC_000596	12.2269	8.31168	4.83092	5.38241	5.49485	6.42067	11.7315	11.9628	16.6725	15.0735	3.95153	4.62947
XLOC_000597	52.621	52.0037	48.3216	47.0866	46.0077	43.8448	48.8902	44.8539	48.1554	47.753	42.0901	44.5417
XLOC_000598	13.4048	12.0544	14.2673	11.3479	11.2081	11.2493	20.3622	15.2344	21.5781	21.735	12.7408	11.9338
XLOC_000599	4.96552	5.38642	5.18324	5.48027	7.0364	8.06302	6.98762	7.31317	9.84245	8.26302	4.76143	4.96142
XLOC_000600	17.4803	18.5546	10.7995	10.7136	14.0751	16.9228	14.287	15.3543	19.1702	22.1956	7.96381	8.93498
XLOC_000601	2.21318	4.42495	2.38482	3.2732	19.7155	21.8198	18.2765	21.4221	55.1103	61.0558	37.9304	26.1687
XLOC_000602	36.498	40.5093	39.245	41.8506	27.1497	38.9312	32.1425	30.3644	32.0626	33.3305	35.9069	42.026
XLOC_000603	32.6944	35.8229	85.3462	76.9889	85.4771	72.2564	62.2617	66.6951	59.729	55.3397	119.221	112.109
XLOC_000604	1656.45	1581.38	5.50039	4.76929	6.02438	5.93102	5.66949	5.53305	95.4906	80.7701	8.5344	7.17116
XLOC_000605	50.2531	46.7815	46.5908	43.6368	42.6813	40.4063	55.2972	48.2411	48.3732	36.4546	31.6203	30.3301
XLOC_000606	126.352	123.749	98.8726	104.144	68.0554	80.4346	62.1388	59.3533	80.9967	74.4661	76.4281	84.3242
XLOC_000607	28.5417	30.0356	49.1133	47.3347	50.3564	45.6481	36.1919	35.5886	33.8253	31.5427	60.0984	57.4435
XLOC_000608	0	0.356614	0.0456917	0.0953264	0.0675836	0.0602114	0.044478	0.200503	0.123729	0.119663	0.0724688	0.234246
XLOC_000609	22.7076	23.4769	58.8655	52.5294	58.3893	49.3921	48.8475	46.086	32.9696	37.1166	49.0347	49.7028
XLOC_000610	17.6118	17.4993	8.75883	8.91745	8.80155	11.236	13.8359	14.5309	15.0736	14.9842	7.39989	8.76759
XLOC_000611	58.4082	59.538	71.7789	64.6275	49.1321	50.9605	38.7223	38.8264	47.3067	44.6356	147.598	153.324
XLOC_000612	0	0	0	0	0	0	0	0	0	0	0	0
XLOC_000613	19.0339	18.2013	73.6869	71.5426	59.2697	60.6582	54.472	52.9082	40.2404	36.579	75.6782	76.7468
XLOC_000614	0	5.57452	0	7.11517	0	0	0	0	1.23277	1.25907	1.66867	0
XLOC_000615	26.7551	27.8424	22.3397	22.5426	75.2305	58.7547	44.9602	47.9749	25.4448	30.8516	59.2035	43.4802
XLOC_000616	19.5701	21.0648	24.2399	26.6553	45.3092	40.9917	21.2735	23.9118	13.5287	14.5537	51.172	31.9144
XLOC_000617	22.4772	21.959	25.5488	22.4083	27.7066	26.7606	25.9373	26.4687	33.2536	27.8418	24.4999	23.8049
XLOC_000618	55.7777	53.1781	51.6608	53.473	52.0271	60.5074	57.8076	55.6348	67.266	65.6393	47.8438	50.862
XLOC_000619	23.486	24.7867	9.48215	8.97214	20.8653	18.2792	18.9842	18.9632	15.6301	16.4387	14.2984	12.4179
XLOC_000620	3.66169	4.38461	0.108421	0.1742	0.279429	0.356388	0.106226	0.105777	0.146021	0.149928	0.294989	0.16724
XLOC_000621	10.2203	9.26462	12.124	8.62868	13.1319	13.1972	12.9016	13.5644	12.5516	13.3807	16.6555	18.0804
XLOC_000622	3.74959	4.73902	0.806068	3.70411	3.92284	3.15258	4.0446	3.01251	2.5476	1.68661	7.74911	6.46954
XLOC_000623	14.4748	16.1507	19.9245	21.0909	21.1025	19.9508	21.7047	20.0205	16.5369	16.004	17.5635	18.0911
XLOC_000624	13.2651	13.6564	4.79606	3.90031	10.1979	8.2766	9.85831	8.63474	9.97533	11.1049	7.7038	5.30797
XLOC_000625	23.9476	23.5511	15.4993	17.9119	13.0726	13.5703	13.774	13.2166	17.144	14.7866	10.9433	10.9278
XLOC_000626	7.521	7.40178	3.6333	3.11809	16.6324	5.88241	2.75811	3.73216	17.7674	27.1365	6.5599	1.45943
XLOC_000627	0	0	0	0	0.00814035	0	0	0	0	0	0	0
XLOC_000628	69.551	71.1963	232.596	226.411	315.604	290.862	165.653	193.024	167.034	167.245	520.691	556.618
XLOC_000629	31.4075	35.7443	26.3688	24.7702	30.1744	28.992	37.8002	34.0174	31.889	34.1308	27.2972	24.969
XLOC_000630	10.4811	9.63207	8.80172	8.45164	8.42396	9.55933	8.81753	9.15835	8.71829	9.86881	12.0347	10.5559
XLOC_000631	8.47746	9.78063	8.92838	9.3775	11.0115	11.5971	11.0763	12.8487	11.3932	14.1143	8.54141	8.9
XLOC_000632	6.28134	4.06995	5.51508	5.51017	6.43616	6.4972	7.26443	6.65277	7.05893	7.2489	5.43009	4.74122
XLOC_000633	31.446	30.8234	18.5981	20.2042	12.6819	16.852	15.5168	13.7259	18.6575	15.8481	20.2285	21.6325
XLOC_000634	20.0617	16.5091	1.61951	2.484	0.243201	0.661245	0.420864	0.718668	2.22882	1.9194	0.565376	0.615794
XLOC_000635	6.57179	7.08634	2.55735	2.23074	0.612998	1.94315	1.32619	0.879268	2.63801	0.822007	1.91519	1.34575
XLOC_000636	9.10033	11.0469	2.10965	2.22163	0.470662	0.227159	0.79081	0.734853	0.86222	1.38382	1.41718	0.425277
XLOC_000637	6421.18	7130.98	13.5052	5.23372	4.38894	14.0474	17.2715	1.77051	23.758	22.9682	16.202	3.50654
XLOC_000638	182.449	189.608	0	2.01428	0	0	0	0.23503	11.818	9.81253	0.854476	0.299238
XLOC_000639	0	0	0	0	0	0	0	0	0	0	0	0
XLOC_000640	1.8546	2.08576	0.228988	0	0	0	0	0	0.153752	0	0	0.21234
XLOC_000641	15.1677	20.5497	6.60394	5.44318	22.1697	9.60142	14.4466	12.1322	8.33885	10.6797	13.8852	9.23143
XLOC_000642	47.9667	51.3945	41.8002	41.9153	32.3694	39.0381	42.9782	46.0211	48.5173	43.5307	28.0978	31.8806
XLOC_000643	147.185	130.161	166.045	200.848	130.235	166.464	137.489	137.519	129.289	133.648	152.348	177.568
XLOC_000644	7.82076	7.97288	7.11111	6.94663	6.5713	5.98715	8.30786	8.7989	11.1965	9.48359	6.67146	6.69904
XLOC_000645	0.596539	0.713614	0.209824	0.406568	0.179444	0.173212	0.150752	0.305639	0.986188	1.20936	0.381397	0
XLOC_000646	0.287452	0.560105	0	0	0.116679	0	0.294666	0.400752	0	0	0.497317	0.128637
XLOC_000647	2.68838	3.50179	0	0.24831	0	0	0.184142	0.0933342	0.172089	0	0	0.237665
XLOC_000648	154.831	161.792	1.01115	0.979631	0.345898	1.29381	0.108972	0.846909	2.07072	1.00544	0.597338	0.656343
XLOC_000649	128.33	149.041	1.11046	1.00995	0.444763	1.08364	0.79085	0.529013	2.14202	2.37234	1.02856	1.33236
XLOC_000650	1.89302	1.64473	0.155821	0	0.533042	0.128633	0.111953	0.113488	0.575435	0.495308	0.49233	0.288985
XLOC_000651	0.258863	0.312326	0.0891517	0.0992965	0.0218674	0	0.0490133	0.0560035	0.0343368	0.0528463	0	0.0474211
XLOC_000652	6.35949	6.9677	1.98027	2.0102	0.878311	1.12813	1.57897	1.75342	3.55993	3.09607	1.32433	1.4868
XLOC_000653	2.20712	3.75091	0.327016	0.52804	0.279669	0.269957	0.156634	0.158783	0.146381	0.0747517	0.0990697	0.303241
XLOC_000654	129.973	138.192	3.80596	3.76336	2.31535	3.30383	2.93179	2.45763	5.0846	5.11233	2.38924	2.98349
XLOC_000655	2.43066	4.26941	11.4052	13.1529	5.21867	6.90241	4.76092	4.43764	4.9988	3.65958	7.49634	7.13384
XLOC_000656	33.9804	34.3695	47.8163	45.9828	31.32	32.9435	31.9031	32.2431	30.4027	27.2435	34.0011	33.1128
XLOC_000657	1091.11	1383.8	1153.61	1082.04	1103.42	892.235	885.26	867.686	865.487	818.487	1025.51	1130.75
XLOC_000658	44.3435	45.5809	11.1223	14.3627	9.25593	9.25631	9.8716	9.11232	14.7	15.9048	9.18906	8.969
XLOC_000659	1843.34	1995.41	1641.41	1598.51	1428.68	1360.27	1227.54	1241.56	1056.92	1150.63	1525.04	1619.9
XLOC_000660	17.9954	19.4103	6.62506	6.52545	8.73973	7.26897	9.38869	7.73331	10.0091	10.1007	5.74767	6.6353
XLOC_000661	9.52017	9.71543	3.41536	3.80053	4.52219	5.02882	4.54286	5.17669	6.04247	5.74515	4.15341	3.9376
XLOC_000662	0	0	0	0	0	0	0	0	0	1.20048	0	0
XLOC_000663	3.24809	1.85546	0.534722	0.222024	0.130658	0.18918	0.0548831	0.27818	0.205162	0.261923	0.0694262	0.14167
XLOC_000664	7.76387	6.37544	3.83903	2.46464	59.4169	72.6528	120.298	108.118	65.1002	79.6989	80.9835	60.7
XLOC_000665	27.424	25.7737	22.06	22.944	29.7972	28.6553	36.8966	33.386	36.7686	38.198	31.902	32.5193
XLOC_000666	55.9571	47.2824	20.4267	21.7549	7.32176	13.0189	10.1437	10.174	16.7957	15.0398	8.32688	7.2511
XLOC_000667	64.3895	69.8309	47.8136	48.6768	40.1578	41.3905	40.1476	37.9174	48.2892	47.9242	36.048	33.179
XLOC_000668	2.43097	3.01345	2.20913	2.32638	0.903566	2.2994	4.76156	4.35942	4.64336	4.41307	2.00777	2.85011
XLOC_000669	49.2277	52.3342	46.2578	44.447	24.1063	26.3443	17.0044	20.1947	16.4386	11.2607	31.8795	39.9858
XLOC_000670	0.908159	0.605247	0.295578	0.289695	0.337138	0.447772	0.360437	0.262389	0.353296	0.820212	0.363946	0.594225
XLOC_000671	1.97032	2.45512	3.0451	3.08671	4.40315	4.83329	5.02805	5.13533	1.49875	2.29901	2.36058	2.59047
XLOC_000672	27.1588	26.1204	15.8184	14.5196	18.4349	20.2407	28.6177	27.7758	37.2004	36.9768	12.9977	14.1456
XLOC_000673	31.9749	37.3773	20.7866	20.6276	25.7162	26.9057	39.5113	39.0979	52.5757	45.1859	17.3329	19.2754
XLOC_000674	1.35663	2.26589	2.88836	2.95934	2.64778	3.01846	2.0928	1.83581	1.09879	1.19403	2.76433	2.49548
XLOC_000675	0.625267	1.16825	0.628927	0.74452	0	0.375449	0.875705	0.186984	0.149141	0.265891	0	0.195234
XLOC_000676	0	0	0	0	0	0	0	0	0	0	0	0
XLOC_000677	0.373544	1.12028	0	0.357473	0.315551	0.304592	0.530191	0.268732	0	0	0	0
XLOC_000678	0.173665	0	0.17154	0	0	0	0	0.124937	0	0	0.311809	0
XLOC_000679	0	0.268907	0	0	0	0.21934	0	0	0	0	0.484498	0
XLOC_000680	0	0	0	0	0.880219	0	0	0	0	0	0	0
XLOC_000681	0.979072	0.875734	0.101799	0	0.0870598	0.0840364	0.0731393	0.0370713	0.0683518	0.0349049	0.04626	0.141597
XLOC_000682	22.9082	23.03	8.9874	11.6097	29.6544	15.9435	15.7537	17.4089	14.9793	15.1239	40.4935	26.8343
XLOC_000683	0	0	0	0	0	0	0	0	0	0	0	0
XLOC_000684	17.1646	29.5132	8.71923	16.6941	14.8752	12.5164	11.2521	8.53297	11.3564	8.00985	21.5253	12.7198
XLOC_000685	2.80962	3.17842	1.31881	1.23332	0.620938	0.829926	0.654315	0.584322	1.41286	0.941806	0.388166	0.744263
XLOC_000686	19.8334	19.2048	7.64301	9.4475	4.20734	6.16437	6.24868	4.99074	7.19635	7.10887	3.35342	5.621
XLOC_000687	6.73692	6.30028	4.29321	6.2391	3.30445	2.65808	5.24371	4.92479	4.90047	4.56338	2.92642	2.5877
XLOC_000688	0	0	0	0	0	0	0	0	0	0	0	0
XLOC_000689	18.646	49.707	36.8357	5.94794	21.0016	35.4765	52.9306	102.842	45.3437	50.521	11.1594	34.1576
XLOC_000690	0	0	0	0	0	0	0	0	0	0	0	0
XLOC_000691	3.51911	4.53935	0.784914	0.76045	0	0.185131	0.0805623	0.653339	0.301156	0.230685	0.30573	0.415913
XLOC_000692	0.359634	0.08988	0.177616	0.258121	0.4557	0.146625	0.191418	0.194044	0.298147	0.121803	0.24214	0.329406
XLOC_000693	0	0.439813	0	0	0.415262	0.358742	0	0	0.317613	0	0	0.14867
XLOC_000694	0	0	1.0922	3.13427	0.79639	0	0	0	0	0	0.846338	0
XLOC_000695	0	0	5.67199	2.55996	3.38961	0	1.64665	1.24037	0	1.17937	0	1.2251
XLOC_000696	2.6181	2.11875	19.3339	25.1739	40.0201	25.5163	24.5965	28.2524	13.0642	18.9165	52.0434	40.6526
XLOC_000697	0.174893	0	0	0	0	0	0	0	0	0	0	0
XLOC_000698	0	0	0	0	0	0.0816148	0	0	0.0663821	0	0	0
XLOC_000699	0	5.54759	7.28696	3.8274	2.82352	1.61324	3.39438	2.84465	3.68189	0	0	1.71282
XLOC_000700	1.20719	0.965443	0.476965	1.3863	0.61186	0	0.856711	0.868463	1.28101	1.47188	0.650236	1.10572
XLOC_000701	2.12565	1.43915	1.75631	1.28421	1.18578	1.72133	1.35277	1.00298	1.66061	1.66511	1.71789	1.84359
XLOC_000702	0	0.773109	0.572917	0	0.489966	0.788252	0.823246	0.556359	0.641132	0.392885	1.04139	0.531264
XLOC_000703	0.121758	0	0	0	0	0	0	0	0	0	0	0
XLOC_000704	0.105196	0	0.103908	0	0	0	0	0	0	0	0	0
XLOC_000705	2.05616	1.82059	4.81635	6.18418	3.92051	5.07775	10.2144	8.83307	15.2733	14.2461	6.3287	5.11191
XLOC_000706	2.19995	1.82659	5.85063	9.03068	4.7128	4.19638	3.83692	2.5368	3.18911	2.53671	6.48134	5.29455
XLOC_000707	1.76891	0.387867	1.43672	3.30508	3.82816	3.94551	1.7527	0.897295	0.689168	1.7149	4.1211	1.00578
XLOC_000708	0	0	0	0	0	0	0	0	0	0	0	0
XLOC_000709	0	0	0	0	0	0	0.423195	0	0	0	0	0
XLOC_000710	0	0	0	0	0	0	0	0	0	0	0	0
XLOC_000711	0	0	0	0	0	0	0	0	0	0	0	0
XLOC_000712	0	0	0	0.440606	0	1.28461	1.43688	4.53211	4.04747	0	0.421427	0.626136
XLOC_000713	5.00227	6.55645	6.31356	7.07419	6.10372	5.93707	7.06053	6.31769	6.93013	6.62617	5.88778	5.65091
XLOC_000714	0.383199	0.422353	0.346556	1.14664	18.4166	16.3091	103.172	60.4508	24.8526	37.2634	5.52955	2.39922
XLOC_000715	6.57481	6.17006	18.8203	17.088	23.1047	20.2817	20.2239	21.1853	11.2488	13.5269	23.7987	22.6448
XLOC_000716	8.3692	8.83671	4.76358	2.47888	7.13585	7.1798	4.42763	6.48112	6.7885	4.83878	5.18841	5.48536
XLOC_000717	8.66808	8.66533	8.562	14.5165	7.32234	10.6021	3.86699	4.67694	8.6233	4.92127	2.44584	7.93952
XLOC_000718	134.279	135.024	88.2395	94.4894	67.9293	92.5719	64.7616	67.3	112.255	126.931	78.3626	84.7179
XLOC_000719	4.26254	3.86785	36.5007	36.273	17.2837	22.6457	10.5643	9.78927	8.11135	4.93064	22.0177	25.4979
XLOC_000720	6.05125	5.4501	11.3341	9.88823	7.71589	6.33075	8.12295	8.15223	10.8852	7.30847	6.86735	7.26817
XLOC_000721	56.5846	45.2263	49.2224	50.1438	44.4914	49.2231	47.4405	51.3945	52.6648	48.9399	46.9181	42.4277
XLOC_000722	30.2639	34.8053	48.1744	45.7263	41.2721	41.1699	35.3622	32.5176	38.8535	40.7534	47.1075	49.4762
XLOC_000723	0.471127	0.305368	0.571672	0.566137	0.45353	0.295846	0.399488	0.175826	0.157374	0.211772	0.505354	0.279434
XLOC_000724	0	0	0	0	0	0	0	0.0951211	0	0.0436029	0.109511	0
XLOC_000725	0.518088	0.725093	0	0	0.0291769	0	0	0	0	0	0.0310068	0
XLOC_000726	22.3117	23.335	16.7835	16.2286	14.9153	17.7323	22.6538	19.8069	21.215	21.5324	15.7313	14.9846
XLOC_000727	17.6887	21.216	28.727	31.175	36.9831	47.9305	32.4304	34.4845	19.1744	20.6021	34.0375	28.6505
XLOC_000728	2.62636	2.88415	4.08537	2.6541	3.02569	3.06768	3.3097	2.32527	1.79171	1.89229	3.23977	2.65487
XLOC_000729	136.487	124.693	41.2267	40.6969	149.851	116.876	74.6907	78.0694	396.265	321.411	63.7449	64.5055
XLOC_000730	10.9248	11.3209	85.9339	83.3194	50.0352	56.5454	38.5762	43.1309	51.9119	38.2189	88.6861	87.4353
XLOC_000731	18.4788	24.2102	20.299	21.697	20.7501	19.6095	21.2297	19.7073	23.2794	19.9038	13.2594	15.2976
XLOC_000732	5.03839	7.17497	4.82211	7.44148	4.99424	2.13566	5.69131	6.03277	4.15033	6.08663	6.28436	4.13629
XLOC_000733	7.74555	8.27887	45.7361	49.9509	16.4042	24.3276	10.2907	13.0808	8.03542	6.98405	28.3961	48.7089
XLOC_000734	6.82364	7.63711	1.10176	0.625607	1.41	0.904886	0.756435	0.6315	1.95102	1.61282	0.778646	1.0076
XLOC_000735	24.6516	26.2234	26.8016	27.7021	28.1358	25.0801	28.6984	28.9997	34.5276	31.5227	42.386	43.3585
XLOC_000736	47.8019	41.8727	33.0746	38.204	34.2214	36.5207	60.627	50.3495	81.5496	74.3873	25.6435	28.1829
XLOC_000737	5.87336	4.09163	9.4932	8.83589	3.76922	5.53779	9.49874	6.01527	10.991	5.79305	4.3072	6.01321
XLOC_000738	3.09653	3.00765	1.84795	1.81964	1.38174	1.42648	0.879709	1.12318	1.76431	1.60125	1.71732	1.25534
XLOC_000739	3.77693	2.96443	3.16342	3.40203	2.89886	2.71625	4.51748	4.05755	3.48736	3.76501	2.3927	2.91531
XLOC_000740	0	0	0	0	0	0	0	0.175404	0	0	0	0
XLOC_000741	0	0	0.0334055	0	0.0571376	0.0551534	0.0240008	0.02433	0.246727	0.206174	0	0.0619536
XLOC_000742	0.202868	0.284526	0.146197	0.0432488	0.162916	0.0759966	0.103553	0.128695	0.433668	0.35097	0	0.125755
XLOC_000743	12.8612	12.3591	1.07497	1.06332	0.58675	0.987612	0.939209	0.719564	1.41583	1.2609	0.648572	0.788798
XLOC_000744	1.94097	0.881978	0.522876	0.506579	0.298114	0.575522	0.184207	0.253882	0.117027	0.144511	0.747031	0.402342
XLOC_000745	2.42222	0.990793	1.07499	0.596194	0.502406	0.929909	0.886667	0.633092	1.1808	1.02849	1.05792	0.548791
XLOC_000746	0.449291	0.252056	1.01531	0.942945	20.4879	16.957	121.418	71.1516	27.0929	49.8448	7.0548	2.2296
XLOC_000747	1.58031	1.8424	13.518	13.9921	9.26518	9.99227	9.09435	8.39515	6.4799	6.26857	13.6231	17.6188
XLOC_000748	0	0	0	0	0	0	0	0	0	0	0	0
XLOC_000749	47.2065	52.4288	178.839	185.116	176.676	180.701	123.631	132.582	124.486	108.694	230.891	267.74
XLOC_000750	32.2397	34.6304	42.5749	40.761	25.758	17.761	14.9546	14.4749	16.4477	15.7127	42.4237	43.3477
XLOC_000751	0	0.153502	0.0967618	0.195926	0.165504	0.119817	0.104281	0	0.135785	0.0510761	0.167754	0.358908
XLOC_000752	31.1835	32.6135	74.6742	78.0915	92.563	78.8744	19.6988	25.3346	21.4352	19.5769	99.018	116.76
XLOC_000753	0.869089	1.13485	0.343381	0.332679	0	0.138848	0.616772	0.204169	0.225867	0.192237	0.234062	0.0796041
XLOC_000754	5.04093	3.98037	2.40931	2.64545	1.7514	2.05515	6.45618	4.47464	7.27968	8.39565	0.912347	1.04258
XLOC_000755	4.21791	5.30708	1.84578	3.78481	3.00208	2.63479	2.25058	2.94751	3.79928	3.914	3.42736	4.20271
XLOC_000756	0.518088	0.725093	0	0	0.0291769	0	0	0	0	0	0.0310068	0
XLOC_000757	2.47165	2.74254	0.599825	1.1007	2.24901	0.638909	1.75479	1.9324	7.16698	3.05179	0.360153	2.51246
XLOC_000758	64.5727	69.8376	17.1281	26.8483	74.3739	76.5874	34.5969	33.3112	205.171	157.553	33.9242	27.6207
XLOC_000759	174.219	232.037	14.6679	13.0867	19.3312	16.9924	33.6634	29.8932	22.9647	27.56	16.1046	11.9865
XLOC_000760	2.88599	0	2.66871	1.5514	1.99474	4.01467	1.9063	0.976166	3.09032	2.18785	1.32684	1.90677
XLOC_000761	4.10348	4.43485	1.93182	0.781806	1.23832	1.22335	1.08707	1.79433	0.97524	1.5803	1.33819	0.791239
XLOC_000762	1.20169	1.82851	2.19178	1.77325	1.5781	1.60831	1.57473	1.68501	2.41102	1.79756	1.10667	1.05522
XLOC_000763	15.3237	14.9638	15.8376	18.0103	14.4906	16.7715	22.9903	18.9236	19.2572	20.2785	12.4814	13.8355
XLOC_000764	7.22116	7.35291	8.30582	9.16509	7.13561	7.94988	9.90954	8.1163	8.80356	9.05621	7.27363	8.21075
XLOC_000765	17.9467	16.8127	22.2982	20.1991	21.7395	21.3527	30.7595	26.147	22.7573	23.2428	19.6578	15.818
XLOC_000766	0	0	0	0	0	0	0	0	0	5.2886	0	0
XLOC_000767	2.88509	3.06478	2.24713	1.88845	2.23184	2.33415	1.49778	2.74575	2.30983	2.79713	1.52431	1.44458
XLOC_000768	1.11004	0.979135	1.41894	1.52629	0.827384	1.33109	0.880446	1.2445	0.822814	1.18196	1.40684	1.76063
XLOC_000769	3.53155	2.5066	0.0348833	0.0337961	0.0298327	0.0863899	0.0751876	0.178032	0.327908	0.263138	0.507259	0.161736
XLOC_000770	13.7852	14.074	4.78025	5.23941	5.24437	5.34127	4.61397	5.73229	9.33716	8.84097	3.99346	4.56704
XLOC_000771	0	0	0	0	0	0	0	0	0	0	0	0
XLOC_000772	3.28989	2.39588	0	0.28605	0.505605	0.243251	1.69292	0	2.37168	1.01372	0	0.547799
XLOC_000773	3.55684	2.14052	0.967598	0.788106	0.556545	0.671523	1.35646	0.94794	0.873903	0.557839	1.92222	0.754319
XLOC_000774	364.35	363.299	84.9039	93.6831	149.642	135.977	118.946	115.628	159.22	168.065	192.587	178.028
XLOC_000775	1.28862	1.8152	0	0	0	0.0477615	0	0	0.0388473	0	0.0525831	0
XLOC_000776	3.37567	2.64496	3.064	2.27004	2.54331	1.93423	2.65462	3.28175	1.93628	2.53377	2.86663	3.09194
XLOC_000777	7.02909	6.22768	10.0301	11.0886	12.771	10.4643	11.3621	9.90765	10.2221	10.5073	16.409	14.8928
XLOC_000778	0.641989	0	0	0	0.613654	0	0	0.76372	0.580237	0	1.27916	0
XLOC_000779	17.7759	16.2153	16.4609	11.9077	15.0161	15.4911	17.3458	20.9406	21.2208	20.6952	15.2597	15.2642
XLOC_000780	10.0581	9.76558	8.36258	9.14065	9.50516	9.88311	11.4516	10.1251	9.28629	10.4892	8.99698	8.88133
XLOC_000781	0.535077	0.178303	1.40941	1.02411	2.26003	1.30892	1.39235	2.30964	0.709751	0.362445	2.08153	1.79705
XLOC_000782	0	0.179272	0.177134	0	0	0	0	0	0.118935	0	0.160988	0
XLOC_000783	13.632	16.3532	11.3936	14.8518	3.3661	4.61729	4.91157	6.78947	11.2665	10.6545	4.89513	4.99448
XLOC_000784	0.753363	0.244945	9.35903	7.16383	3.22792	5.39445	2.6903	2.82036	1.66592	1.21174	4.47975	8.13937
XLOC_000785	0	0	0	0	0	0	0	0.191951	0	0	0.23953	0
XLOC_000786	0	0	0	0	0	0	0	0	0	0	0	0
XLOC_000787	10.8125	12.0538	30.1063	28.116	41.9839	28.8729	8.5451	9.07341	7.09702	9.29457	37.7141	48.1633
XLOC_000788	0	0	0	0	0	0	0	0	0	0	0	0
XLOC_000789	0	7.95892	0	0	0	6.49185	0	0	0	0	0	0
XLOC_000790	0	0	0	0	0	0	0	0	0	0	0	0
XLOC_000791	1.66433	1.96837	1.5045	1.16016	1.84296	2.01054	1.76951	1.92015	1.85602	1.23073	1.15335	1.38387
XLOC_000792	3.97222	2.58858	1.97794	1.65272	3.9471	2.66083	2.57323	3.09251	2.57302	2.30481	3.63147	3.22961
XLOC_000793	5.75823	6.90769	7.80775	6.61259	15.7425	11.4395	11.5164	12.277	20.6226	17.2329	12.5004	9.87723
XLOC_000794	1.06895	2.09475	1.33061	0.399125	0.543434	1.06089	0.82058	1.66808	1.69916	1.40592	2.14238	1.95983
XLOC_000795	0	0	0	0	0	0	0	0	0	0	0	0
XLOC_000796	0	0	0	0	0	0	0	0	0	0.882193	0	0
XLOC_000797	0.824911	0.412325	0.598534	0.579879	0.348421	0.336321	0	0	0.27355	0.279385	0	0.755576
XLOC_000798	1.89556	2.73706	0.801457	1.00044	1.2644	0.661615	2.00728	2.58029	1.61505	1.64883	2.73206	2.60116
XLOC_000799	13.0492	9.95892	14.1241	12.1643	11.7186	8.52364	9.09766	6.72722	6.87317	10.4648	8.86075	9.02182
XLOC_000800	0	0.426543	0	0	0	0	0	0	0	0	0	0
XLOC_000801	0.83097	0.46868	0.628737	0.34047	1.1253	0.556388	1.44355	1.10339	1.06607	1.03235	0.658434	0.527548
XLOC_000802	1.88252	1.516	6.97306	6.70569	3.48973	4.56245	4.49038	3.79958	2.01152	2.62117	2.76971	5.22078
XLOC_000803	0.285066	0.35622	0.140789	0.136401	0.180607	0.232446	0.252881	0.5127	0.378125	0.289643	0.767737	0.456936
XLOC_000804	0	0	0	0	0.457779	0.308457	0.269194	0.51981	0.138803	0.122358	0.171368	0.172801
XLOC_000805	1.22209	2.4434	2.41427	0.584755	0.516179	0.498253	0	0.439592	0.405259	0.413903	2.19421	0
XLOC_000806	0.279433	0.279345	0	0.0668528	0.118025	0.0569633	0.0495768	0.0502569	0.138995	0.14196	0	0.0639867
XLOC_000807	0.568305	0.634114	0.791529	0	1.79142	1.29385	1.4301	1.21489	0.803768	1.25861	1.37481	0
XLOC_000808	4.9598	6.40437	0.816516	1.38437	0.698296	2.69618	1.61326	1.48672	3.56357	3.91955	1.66971	1.70359
XLOC_000809	1.08779	0.543725	1.07448	3.64348	1.83782	0.4435	0.771981	0.782571	2.16435	0.368419	0	0.498182
XLOC_000810	3.82721	4.40903	8.11305	1.27942	2.98473	1.91728	0.845623	1.46697	4.93101	3.10974	4.75612	1.58921
XLOC_000811	3.80728	3.42547	0.752137	0.364348	0.321619	0	0.540387	0.2739	0.505015	0	0.34179	0.697455
XLOC_000812	1.27286	1.17457	0.290142	0.0936997	0.165422	0	0.208458	0.211317	0.324688	0.132645	0.0878986	0
XLOC_000813	4.9537	4.02614	6.36199	7.16448	5.6769	5.4366	5.34739	6.00002	5.34927	2.79242	7.46921	5.0715
XLOC_000814	15.8605	18.5211	18.8191	18.1387	14.3756	17.607	13.1156	14.367	15.4281	15.9916	13.6449	15.6716
XLOC_000815	0	0	0	0	0	0	0	0	0	0	0	0
XLOC_000816	669.109	660.789	1071.89	1073.61	643.903	641.638	429.279	477.963	448.544	427.037	726.392	798.901
XLOC_000817	9.87883	10.6964	19.0842	21.3967	56.2873	44.3557	25.7234	30.9033	22.0198	26.5462	58.1918	47.4601
XLOC_000818	2.82065	2.67814	2.26852	2.15296	1.62332	2.11722	1.89596	1.79239	1.1415	1.79992	1.64581	1.51631
XLOC_000819	43.8738	44.3408	72.2167	72.7451	103.106	82.8373	89.7873	95.9337	76.8334	70.6246	87.6785	88.1902
XLOC_000820	23.5612	25.2961	30.7967	31.3761	30.0979	25.7652	15.3694	18.2737	19.4794	16.0471	35.1174	29.4741
XLOC_000821	27.6263	28.6547	33.5054	35.9133	28.6322	29.8098	19.1061	20.762	21.7621	19.0151	44.9558	41.3472
XLOC_000822	14.8266	17.2901	80.8134	72.0472	130.4	121.172	112.646	121.157	104.566	92.4217	119.938	114.975
XLOC_000823	105.088	102.488	59.5417	56.8259	39.7498	44.4938	59.0431	57.8209	63.9063	65.0955	36.4222	41.8066
XLOC_000824	11.6385	11.7222	10.1228	11.6307	8.5761	9.28114	15.176	12.7165	18.0838	17.5435	7.10156	7.55242
XLOC_000825	54.226	40.3301	34.9634	32.3404	21.273	28.1982	41.1	43.3458	49.8222	42.0179	16.159	17.4875
XLOC_000826	4.92817	4.02362	4.14388	5.49485	3.59645	3.2577	4.33893	3.79216	4.91523	4.83367	2.21667	4.10699
XLOC_000827	0	0	0	0	0	0	0	0	0	0	0	0
XLOC_000828	1582.59	1527.33	38.9074	72.3012	35.5445	59.978	31.1314	23.2466	46.2755	60.8593	43.5071	47.5395
XLOC_000829	1.08049	0.974421	0.952289	1.31	2.95238	1.83109	1.57036	2.16552	1.2643	1.47335	2.47129	1.84393
XLOC_000830	7.24427	6.40166	7.1538	6.81968	6.19932	6.88305	6.13866	5.43282	5.75922	6.34559	7.48944	6.72183
XLOC_000831	66.3592	61.4624	27.1417	28.4651	58.9002	49.853	56.3075	49.914	49.8882	48.8118	40.8868	38.3189
XLOC_000832	23.0812	22.4335	6.23255	7.18454	6.82564	7.90573	10.4505	8.91058	18.0246	17.6937	5.18343	5.81335
XLOC_000833	3.56621	2.21524	1.81465	2.68885	1.00418	1.4229	1.68723	1.3994	2.22184	2.41564	0.582089	0.653864
XLOC_000834	17.9263	16.18	0.161216	0.234288	0.344686	0.266173	0.289573	0.293545	1.24484	1.16084	0.206824	0
XLOC_000835	212.827	225.775	106.386	103.997	75.2588	81.1557	83.9949	97.8418	96.123	104.879	96.8827	79.7297
XLOC_000836	12.0333	11.5026	6.78972	6.97659	8.32917	7.52022	8.72932	9.35197	10.2527	9.81688	8.67365	8.35201
XLOC_000837	10.3008	10.2357	25.729	21.6051	17.3388	13.8854	15.8402	13.4352	13.3955	12.4881	10.9554	21.0856
XLOC_000838	3.63979	3.5719	14.029	12.8448	8.30637	9.63068	7.56087	8.34221	5.98918	4.90848	10.115	10.1745
XLOC_000839	0.353533	0	0	0	0	0	0	0	0	0	0	0
XLOC_000840	16.9653	16.9226	9.59692	9.44085	11.2694	10.4819	9.17577	9.70489	10.5083	11.0109	6.84355	6.4348
XLOC_000841	69.9434	70.1478	133.825	128.972	145.222	109.814	89.6226	98.423	93.8498	95.084	210.783	196.731
XLOC_000842	7.70158	6.615	4.57489	6.13464	3.1973	4.22499	8.07714	9.81781	12.9283	10.332	4.03815	3.82732
XLOC_000843	1.4572	2.48043	0.957835	0.977412	4.16728	2.29138	4.57523	3.71315	11.2975	11.4781	2.5986	1.57836
XLOC_000844	5.95806	4.66493	5.24428	3.75025	4.67379	5.0299	4.05105	5.84169	4.08315	4.88657	6.23053	5.74332
XLOC_000845	16.1482	16.9105	14.2722	14.0568	12.6053	14.4001	16.5547	15.1273	13.6169	14.8799	10.4885	11.6648
XLOC_000846	56.1569	55.2762	31.4381	30.9745	20.4154	26.7884	33.0387	30.3872	59.1404	51.2301	16.3203	18.1832
XLOC_000847	5.14108	5.34333	2.94248	3.30712	3.99792	5.23543	6.48254	6.42633	7.16654	6.05034	2.85819	3.82774
XLOC_000848	3.72803	3.26617	3.15129	2.9066	2.41939	2.22499	3.96105	3.73261	4.19785	5.10181	2.6908	1.71282
XLOC_000849	0	0	0	0	0	0.176804	0	0	0.152123	0	0	0
XLOC_000850	9.86978	7.33345	0	0	0	0.0657054	0	0.0788754	0.563338	0.700974	0.0851292	0.077395
XLOC_000851	1.96667	3.10199	3.92838	3.47136	2.62123	5.27422	6.01702	4.15022	4.08694	3.37482	0.588513	1.24096
XLOC_000852	0.754923	0.754684	0.932105	1.26428	0.558004	1.07725	0.535751	0.407325	0.751023	1.34232	0.423573	0.777905
XLOC_000853	3.24339	3.82116	4.62299	3.56756	6.83835	2.85727	5.60484	4.30486	5.09449	5.0453	5.10003	4.94935
XLOC_000854	33.7432	37.1576	55.1452	48.8371	161.055	74.2707	42.6989	51.9124	79.8771	58.737	134.744	139.646
XLOC_000855	10.0145	4.23555	5.70688	6.26621	4.8806	4.08296	7.65373	5.54194	9.45183	9.91435	6.9156	5.64477
XLOC_000856	7.49708	7.00894	4.27406	4.56158	5.19943	5.33962	7.50453	6.47551	8.31775	7.99361	7.56126	8.09621
XLOC_000857	8.57877	7.73178	7.0688	7.6567	10.6263	10.7647	16.8765	16.3405	20.2233	19.2696	11.5721	12.4176
XLOC_000858	7.68338	7.47051	0.415855	0.30217	0.445808	0.171647	0.284974	0.323568	0.388119	0.322703	0.249323	0.439022
XLOC_000859	2.6088	2.70456	2.05195	2.31162	1.1427	1.1818	1.95425	1.80729	1.89042	1.79984	0.824034	1.19476
XLOC_000860	13.8794	12.8279	9.31217	14.2847	9.29121	10.0362	16.1687	10.3618	11.9841	11.1754	8.46338	9.11488
XLOC_000861	16.6152	20.9379	9.3617	14.669	20.5593	15.0748	17.8929	17.7614	16.219	16.2559	10.2959	12.3253
XLOC_000862	39.1859	38.4182	31.426	32.9549	37.4805	37.4101	37.5049	34.2246	41.2999	41.8076	39.3865	38.8424
XLOC_000863	0.371442	0.92831	0.244597	0.296217	0.36607	0.656236	0.659009	1.11341	1.56021	1.84509	0.38903	0.62374
XLOC_000864	0	0	0	0	0	0	0	0	0	0	0	0
XLOC_000865	24.2745	28.0378	7.3423	8.41677	5.20921	6.74953	4.05595	5.62591	8.7409	8.12776	4.36153	6.91578
XLOC_000866	7.82888	9.1683	9.45729	8.90801	11.2078	9.60626	13.398	11.7973	10.3139	9.68983	11.9288	12.2675
XLOC_000867	46.0182	43.589	40.4532	40.3283	31.6746	32.5441	33.2029	30.7947	45.8511	39.1319	34.7284	36.2472
XLOC_000868	22.0575	23.8812	16.9744	16.3318	15.6315	13.56	14.6907	11.9926	14.9506	14.0949	30.2708	28.4684
XLOC_000869	1.96018	1.53966	3.18089	3.61771	1.18276	2.05503	1.29173	1.108	0.464299	0.853565	2.38818	1.92367
XLOC_000870	0.325976	0.327747	0.0793801	0	0	0	0.0585493	0.0587894	0.164165	0	0	0.148295
XLOC_000871	0	0	0	0	0.584762	0	0.982522	0.996	0.459104	0.468897	3.72862	3.17025
XLOC_000872	8.72518	7.16484	7.15635	8.7474	7.48026	8.36391	9.38022	8.46273	9.71345	8.75972	5.57158	7.73018
XLOC_000873	6.19996	6.44814	6.45497	5.50615	5.06366	6.05813	6.36047	6.18729	6.17942	6.66157	4.9759	5.35637
XLOC_000874	3.87638	2.52292	4.41512	3.63501	4.12134	3.27337	4.44087	2.75323	2.57999	2.46254	3.56273	3.96843
XLOC_000875	17.9374	19.4552	23.8016	21.8445	29.7152	30.5989	25.9327	27.2934	25.8986	26.365	29.7833	28.9339
XLOC_000876	3.15655	2.56651	2.5359	3.38323	5.11965	5.18209	3.97249	3.96642	4.35446	3.19297	5.47853	4.43323
XLOC_000877	0.222444	0	0	0	0	0	0	0	0	0	0	0
XLOC_000878	2.26372	1.5841	0.574976	0.526108	0.327818	0.50102	0.436052	0.558359	0.729228	0.854309	0.667725	0.473932
XLOC_000879	1.89244	1.67355	0.79085	0.835856	1.04526	1.18701	2.84101	2.87998	3.33087	2.95819	1.37219	2.5334
XLOC_000880	7.27896	6.52789	4.14939	4.33849	5.97421	4.88372	6.25759	5.65523	5.2687	4.81762	8.17712	6.40115
XLOC_000881	18.7461	19.6425	38.2928	33.324	23.3072	26.8649	21.4489	24.0403	19.1504	20.7566	24.2765	24.6524
XLOC_000882	26.6215	25.9775	53.6972	51.4911	27.9697	38.8058	31.9764	35.7584	30.5873	30.3973	24.2323	34.4658
XLOC_000883	0.0895831	0	0	0	0	0.0730471	0.12715	0	0	0	0	0
XLOC_000884	0	0	0	0	0	0	0	0	0	0	0	0
XLOC_000885	136.303	143.004	44.7041	45.9998	306.191	180.402	149.177	153.302	515.309	494.12	163.987	140.27
XLOC_000886	1.66266	2.08915	1.72929	1.69306	1.22086	1.97516	1.3627	2.42206	1.83361	1.61613	1.45784	1.18352
XLOC_000887	0	0	0	0	0	0	0.205481	0	0	0	0	0.0781045
XLOC_000888	0	0.169921	3.14264	1.97417	1.23897	1.81097	2.18696	1.00553	0.269825	0.154027	1.15658	1.47923
XLOC_000889	2.35648	3.15374	2.70794	2.8619	3.80284	2.16563	3.65246	5.51851	4.94248	3.69719	3.54375	3.91096
XLOC_000890	23.3215	21.5177	0.308691	0.224302	0.263997	0.191122	0.526739	0.646378	1.63223	1.24367	0.385762	0.286248
XLOC_000891	0	0.512072	0.632457	0.122549	0.108177	0	0.0908801	0.184254	0.169863	0.173486	0.344886	0.117295
XLOC_000892	50.2839	67.388	59.8034	106.192	585.09	751.199	672.729	684.651	293.52	404.216	27.8833	50.8404
XLOC_000893	0	0.369246	0.433338	1.41389	1.06925	0.903549	0.833442	0.655977	0.253944	0.750585	0	0.36007
XLOC_000894	0.575519	1.15067	0.568476	0.550758	2.43084	0	0	0.414035	0.763394	1.16952	0	0.527146
XLOC_000895	0	0.169014	0	0	0	0.06893	0	0	0	0.0572607	0.151777	0.0774288
XLOC_000896	6.55293	6.77592	5.65089	8.53747	5.39895	5.1042	9.53337	6.77995	8.24513	9.09857	8.9023	9.17431
XLOC_000897	6.19507	5.66603	4.1663	2.9012	3.00634	4.40665	4.58358	4.36197	5.94452	4.28563	4.25987	4.82925
XLOC_000898	1.55792	2.0969	0.681455	0.569301	1.14963	1.45269	1.54573	0.863665	1.03533	1.19164	1.6733	1.64575
XLOC_000899	0	0	0	0	0	0	0	0	0	0	0	0
XLOC_000900	0.575519	1.15067	0	0	0	0.469285	0.408432	0.414035	0	0.389839	1.03332	0
XLOC_000901	7.43833	6.84448	7.3561	7.74554	8.01563	6.49808	5.14768	4.83368	3.78784	4.61578	7.65823	7.36724
XLOC_000902	0	0	0.143791	0.278619	0.122972	0	0.413237	0.523632	0.096547	0.197213	0	0
XLOC_000903	3.95957	4.83794	3.47654	4.0699	4.21202	2.39162	2.91409	3.69258	5.44668	4.27148	3.68627	3.89541
XLOC_000904	0.11236	0	0	0.107526	0	0	0	0.0808331	0	0	0	0
XLOC_000905	0.751117	0.671839	1.32765	1.32411	1.23561	1.45059	0.729436	0.995403	0.943878	0.883676	1.10017	1.41218
XLOC_000906	0	0	0	0	0	0	0	0	0.820619	0	0	0
XLOC_000907	7.32913	6.54631	2.70762	3.44384	1.30469	4.36732	4.61283	3.76363	5.28417	4.62465	3.41849	3.03401
XLOC_000908	0	0	0	0	0	0	0	0	0	0	0	0
XLOC_000909	0	0	0	0	0	0	0	0	0	0	0	0
XLOC_000910	0	0	0	0	0	0	0	0	0	0	0	0
XLOC_000911	0	0	0	0	0	0	0	0	0	0	0	0
XLOC_000912	0	0	0	0	0	0	0	0	0	0	0	0
XLOC_000913	0	0	0	0	0	0	0	0	0	0	0	0
XLOC_000914	5.19753	5.66823	0.93344	0.452174	0.399145	0.577926	0.670647	0.339924	1.09681	1.12021	0.21209	0.432788
XLOC_000915	0	0	0	0	0	0	0	0	0	0	0	0
XLOC_000916	0	0	0	0	0	0	0	0	0	0	0	0
XLOC_000917	8.08076	9.92499	1.43125	1.93327	1.23251	1.63835	1.10154	1.45335	2.37398	1.74331	1.30981	1.51514
XLOC_000918	5.06195	4.49809	6.66667	3.22944	11.878	11.0069	3.59235	5.66475	7.83347	7.2386	6.56393	2.57583
XLOC_000919	1.60216	1.23817	2.90927	2.93016	3.91988	4.03147	3.71338	2.94269	3.06306	2.99553	3.40498	3.30808
XLOC_000920	0.987424	1.23389	0	0	0.625593	0.402579	0.525563	0.532773	0.491162	0.334425	0.44322	0.226107
XLOC_000921	2.16702	2.16633	2.1405	0	0	0	0	0	1.43722	0	1.9454	0
XLOC_000922	1.08185	0.540753	1.06861	1.55296	0	2.20538	0.383881	0.778295	0.717507	0.366406	0.485604	1.98184
XLOC_000923	0.19719	0.197127	0.389553	0.188706	0.333151	0.160791	0.279882	0.141861	0.392342	0.400711	0.531069	0.903079
XLOC_000924	2.5685	2.50483	2.6981	2.44162	1.48436	2.34624	2.0626	3.19925	2.92475	2.98979	2.60063	2.6921
XLOC_000925	0.3381	0.563552	0.221001	0.211967	0.647748	0.271108	0.206055	0.628731	0.289648	0.0733747	0	0.204719
XLOC_000926	0.17719	0.267317	0.369373	0.451733	0.0399776	0.315254	0.26486	0.240262	0.323928	0.41547	0.231438	0.333431
XLOC_000927	0.174243	0.3591	1.2291	1.85815	1.90576	1.30923	0	0.23455	2.45794	0.417271	0.230874	2.17058
XLOC_000928	2.09235	3.19005	3.18664	3.88962	4.31142	6.59329	2.74375	3.38255	5.56878	3.67628	4.76623	4.17715
XLOC_000929	0.42424	0.424105	0.139683	0.135329	0.836209	3.11182	1.00358	1.01734	0.468942	0.574734	1.90426	0.647636
XLOC_000930	0.771102	0.43531	1.21324	0.89832	0	0	1.57503	1.31275	0.763004	0.895066	0	2.04835
XLOC_000931	0.860776	2.86834	0.850242	1.3729	1.93904	1.63774	0.610872	0.825669	1.71266	2.1379	1.03032	1.57685
XLOC_000932	12.9579	14.9433	20.9936	19.9254	29.7981	23.9843	18.7545	16.0163	14.8301	13.2757	15.3279	20.0905
XLOC_000933	0	0.142497	1.49766	0	0.765399	0.483335	0	0	0	0	0.622054	1.73717
XLOC_000934	0.697108	0	0	0	0	0	0	0	0.462338	0	0	0
XLOC_000935	0	2.53724	1.25349	1.21442	2.14401	1.03478	0.900595	6.39064	3.36658	2.57879	2.27848	1.16236
XLOC_000936	0	0	0	0	0	0	0	0	0	0	0	0
XLOC_000937	0.118978	0	0.117521	0.113859	0	0	0.126653	0.0855937	0.0789086	0.201479	0.10681	0.0544886
XLOC_000938	0.134496	0.20168	0.664251	0.643549	0.681692	0.658019	0.715866	0.677307	0.535206	0.819933	0.845188	0.862342
XLOC_000939	0.624538	1.56085	0	0.298834	5.27577	5.60181	10.4157	6.73949	6.42022	7.82629	7.28865	3.43227
XLOC_000940	0.668847	0	0	0	1.97752	1.90885	1.66132	1.20294	1.55258	2.94486	1.80133	0.612629
XLOC_000941	0.661398	0.330594	0.108884	0	0	0	0.0782297	0.237909	0.877309	0.373342	0	0
XLOC_000942	0	0	0	0	0	0	0	0	0	0	0	0
XLOC_000943	37.199	29.9038	15.5511	15.2548	7.43859	11.8749	24.7901	20.2457	49.7284	49.6655	6.69525	6.65476
XLOC_000944	140.123	129.062	89.1513	94.3922	116.162	109.247	92.5407	98.5872	125.162	122.197	122.319	111.622
XLOC_000945	16.426	15.5058	21.6308	21.3892	29.4199	25.0989	20.1692	20.8964	16.3251	18.4679	28.6272	22.7665
XLOC_000946	4.99106	6.11575	5.10633	4.2644	3.40818	4.54652	6.60312	4.73241	5.81863	5.32273	4.57375	5.09094
XLOC_000947	0	0.176553	0.174447	0	0.0748729	0.288018	0.251366	0.254109	0.175697	0.0598147	0	0.0808823
XLOC_000948	0.300879	0.556837	0.0832066	0.0804163	0	0	0.0564713	0.241813	0.0480614	0	0	0
XLOC_000949	0	0	0	0.179414	0.158373	0	0.13305	0	0.124341	0.380979	0	0
XLOC_000950	8.45678	8.59865	6.32217	5.81632	10.8307	9.76712	19.2566	20.8864	25.1914	21.841	8.93641	8.06827
XLOC_000951	1.70128	1.70074	0	0.0602994	0.212911	0.0513794	0	0	0.0417899	0.170725	0	0
XLOC_000952	7.41418	6.78225	0.0848275	0.383524	0.217637	0.163395	0.284414	0.267722	0.303768	0.310248	0.282684	0.235981
XLOC_000953	0	0	0	0	0	0	0	0	0	0	0	0
XLOC_000954	306.945	279.639	3.02928	3.4293	1.98154	5.82956	2.63971	2.76943	3.15111	4.60413	1.97479	2.01487
XLOC_000955	123.556	132.185	1.42741	0.691462	0.610372	1.76753	0.512776	1.03962	1.43763	1.95773	0.648653	0.661818
XLOC_000956	247.802	248.551	1.56348	1.63127	0.925693	1.45349	0.172817	0.875941	3.07441	1.89693	1.31167	1.00372
XLOC_000957	3.42206	3.78988	3.05618	1.53129	1.11479	2.63827	1.84603	2.35217	3.24328	1.74434	1.5035	2.71592
XLOC_000958	0.42336	0.423226	0.836358	0.699797	0.46796	0.407979	1.03791	0.443011	0.510513	0.703893	0.650329	0.564038
XLOC_000959	58.5248	60.6393	2.03233	1.09388	1.15872	1.36703	1.08161	0.712688	9.29943	8.00085	1.36821	1.53558
XLOC_000960	0	0	0	0	0.205457	0.198322	0.35185	0.174973	0.483921	0.329495	0	0
XLOC_000961	0.400766	0	0.409196	1.97559	3.25586	5.10087	32.1728	20.6268	6.56155	13.6216	2.911	1.26886
XLOC_000962	2.10853	2.05537	9.15948	8.79206	8.73398	9.04375	7.4969	5.31293	4.26545	3.53795	7.94986	7.76515
XLOC_000963	10.3839	9.88336	10.871	11.2463	10.6627	9.93752	10.6788	10.4226	10.4334	10.4032	9.04285	9.682
XLOC_000964	20.4262	21.1736	20.785	19.4026	49.6856	38.4521	30.6831	31.7639	22.6447	28.6461	38.4982	27.4313
XLOC_000965	11.4581	10.8183	6.11925	6.51143	6.55864	6.09996	4.93983	4.90297	7.97653	6.95144	5.74771	4.78534
XLOC_000966	6.24776	6.99881	7.65941	7.33588	7.63593	6.97331	7.07534	7.26803	7.55262	7.0534	8.31374	9.17243
XLOC_000967	5.44734	5.21139	6.0171	6.16588	4.50267	4.15525	5.2376	5.35158	5.0113	4.64208	4.73248	4.98948
XLOC_000968	1.22899	0.996004	0.345582	0.870717	0.325373	1.46698	1.14305	1.5116	1.2892	1.62526	0.700414	0.513385
XLOC_000969	8.9504	5.8235	14.3221	14.2342	2.10928	0.96781	1.18106	2.30989	4.06217	5.08954	2.09221	2.5782
XLOC_000970	0	0	0.333713	0	0	0	0	0	0	0	0	0
XLOC_000971	99.4155	96.6772	1.7018	1.4828	1.33531	1.66166	0.931251	0.818063	2.85515	1.76874	0.595565	0.893899
XLOC_000972	2.77081	3.96745	0.829694	0.663176	0.792597	0.8355	0.748814	0.674659	1.2155	1.24818	0.837488	0.684809
XLOC_000973	100.073	111.411	0.915732	0.906666	0.634282	0.760226	0.589713	0.733661	2.54027	1.6221	1.03398	0.69052
XLOC_000974	103.803	113.261	126.368	122.007	160.978	126.938	104.884	110.763	134.688	130.95	181.414	181.688
XLOC_000975	0.498059	0	0	0	0	0	0	0	0.165162	0.0843425	0.111781	0
XLOC_000976	63.7517	65.2145	22.538	26.4736	29.818	24.8476	27.02	23.9692	33.7078	37.5644	39.4287	40.6597
XLOC_000977	7.7623	7.59984	0.734187	0.765807	0.220248	0.391513	0.43174	0.375139	1.56331	0.596261	2.3101	1.13862
XLOC_000978	3.73974	3.95131	1.37981	1.34469	1.45181	1.55285	1.48934	1.53001	2.41473	1.70112	1.30863	0.887552
XLOC_000979	17.9942	18.6999	18.678	19.5472	31.1312	25.4193	19.6748	20.7243	16.5051	15.2914	23.0672	20.6893
XLOC_000980	1.67392	2.30408	6.21928	4.74074	8.61095	6.9583	9.06223	9.18418	7.20986	6.86449	5.18631	3.98685
XLOC_000981	79.6544	60.579	1.22205	2.84618	2.10964	3.9181	0.553842	1.677	1.05662	2.64434	3.42518	2.79077
XLOC_000982	18.6732	19.1446	17.5015	19.3928	14.6986	14.6208	16.1508	16.1052	17.5213	16.3858	12.144	12.3905
XLOC_000983	0.493754	0	0.096917	0.661342	0	0	5.86711e-06	0.60806	1.63419	1.72715	0	0
XLOC_000984	60.4174	66.4701	49.241	49.0962	47.9201	43.4321	55.0935	52.418	46.284	44.434	41.1801	45.0339
XLOC_000985	54.2758	53.72	21.1076	18.1298	47.0628	55.0926	69.6768	72.1506	78.3357	76.3879	73.712	70.7671
XLOC_000986	27.1222	34.5428	32.0852	29.6251	29.4302	30.1603	52.9433	42.6838	43.6801	53.3001	29.0777	28.0262
XLOC_000987	1.57543	1.57493	3.11229	2.01019	6.43238	4.06797	5.77655	4.15572	3.30872	3.55715	3.30005	2.64552
XLOC_000988	5.91682	6.1966	9.46237	10.7852	14.5067	13.8613	13.6328	13.3104	10.1474	9.28183	9.52733	9.3766
XLOC_000989	0.417382	0.346159	0	0	0	0	0	0	0.0999268	0	0.0968105	0.201805
XLOC_000990	0	0	0	0	0	0	0	0	0	0	0	0
XLOC_000991	0.217389	0	0.431547	0	0	0	0	0	0	0	0	0
XLOC_000992	808.771	795.848	573.816	558.097	336.108	356.908	354.463	320.422	372.903	394.651	406.547	416.353
XLOC_000993	2.28902	3.02227	1.8344	2.02521	1.54629	1.72563	3.24892	2.45458	2.18998	2.55275	2.05492	1.78015
XLOC_000994	0	0	0	0	0	0	0.467247	0	0	0	0.363696	0
XLOC_000995	0.0897455	0.448585	0.797824	1.1165	20.0902	15.7336	118.719	65.6123	29.5225	48.0856	4.91459	2.21946
XLOC_000996	0	0.0416139	0	0	0.0351644	0	0	0	0.027608	0	0	0
XLOC_000997	0.940531	1.15076	0.31655	1.67165	0.46396	0.49348	0.765942	1.22985	0.876302	1.21573	0.695261	1.57611
XLOC_000998	0.894097	1.0215	0.50466	0.122233	0.107898	0.104151	0.362582	0.551334	0.423561	0.173038	0.343996	0.818947
XLOC_000999	3.27911	3.42816	14.0529	9.58661	5.78968	6.96529	2.56433	5.53035	3.64268	3.03121	14.0552	17.459
XLOC_001000	1.60958	2.13202	7.55194	9.58856	3.84112	4.4624	4.19788	3.6186	1.78808	2.3441	6.03274	7.70319
XLOC_001001	2.48367	2.52559	3.60734	3.54525	3.8886	2.23344	1.9206	2.32742	3.14731	3.67698	3.03993	4.3171
XLOC_001002	6.64627	7.40361	1.40662	1.58006	1.91125	2.22429	2.82304	2.73602	5.00697	4.59094	0.557593	0.951993
XLOC_001003	13.9864	10.5404	0.107095	0.166779	1.76664	1.49213	4.39064	4.46767	11.1539	12.2182	0.782267	0.877958
XLOC_001004	3.76054	3.42103	6.21493	7.57906	4.05484	4.25299	4.58748	3.68159	2.99707	4.44554	5.00588	7.00307
XLOC_001005	8.28889	7.90223	8.78757	8.06636	6.70874	6.08651	8.06925	6.71241	7.2243	7.29928	4.753	4.53147
XLOC_001006	10.4288	10.3889	10.0885	11.1742	9.55439	9.79922	8.57244	9.78953	8.85134	10.0317	9.35084	10.1654
XLOC_001007	7.98634	6.87198	7.42924	7.44907	7.1155	7.61661	7.56159	7.44727	9.37291	8.03928	5.66295	6.87061
XLOC_001008	8.09378	4.61663	9.49084	14.8291	2.22806	2.169	0.783478	2.65108	2.69719	1.43282	1.83298	1.83371
XLOC_001009	0	0.484871	0.14572	0.149417	0	0	0	0	0	0	0	0
XLOC_001010	0.0461489	0.0922684	0	0	0.0389841	0.0752606	0	0	0	0.0625196	0	0.04227
XLOC_001011	0.218775	0.151329	0.31658	0.114735	0.166519	0.333644	0.68553	0.403646	0.385429	0.246774	0.377122	0.862286
XLOC_001012	2.0587	2.48681	1.81098	2.40899	3.34445	3.0776	2.83206	4.44238	3.71209	3.13763	5.82122	4.16418
XLOC_001013	0.115845	0.163432	0.201853	0.15645	0.103577	0.333266	0.328849	0.411642	0.243958	0.387586	0.807201	0.524099
XLOC_001014	138.526	142.439	2.4538	1.73263	2.56091	3.36464	2.53989	2.45357	2.68081	2.25314	2.68373	2.46824
XLOC_001015	91.7462	84.4633	59.9946	61.0725	142.281	128.989	138.588	136.676	85.0594	96.7318	89.1684	89.6405
XLOC_001016	1.76242	3.96419	1.88592	0.421648	0.868467	0.718549	1.04229	1.37356	3.11701	2.28813	1.18663	0.403572
XLOC_001017	11.6254	12.8134	1.25196	1.35417	1.43368	1.89741	1.16042	1.41334	1.89428	2.01758	1.89588	1.72813
XLOC_001018	3.31699	3.83608	2.50548	2.11618	3.35143	3.5676	3.23096	5.05329	6.3207	6.9167	4.08711	3.78484
XLOC_001019	8.78953	8.46787	6.25101	7.47035	14.311	13.5431	16.2181	11.6222	13.549	15.7505	14.0453	13.19
XLOC_001020	2.55857	2.50473	2.63975	2.91063	2.53274	3.1559	4.06105	3.09547	5.63969	4.9088	1.78013	1.85082
XLOC_001021	0.721942	1.96698	0.55661	0.3667	1.79144	0.306326	0.399907	0.540524	1.4172	1.7265	0.381982	0.516143
XLOC_001022	0	1.4952	2.08707	1.3834	2.35066	3.4425	1.04465	1.5401	1.43693	1.45261	1.60724	1.93154
XLOC_001023	2.75683	3.52505	2.72309	3.12905	2.00387	2.77073	3.09393	2.90575	3.61426	2.86623	2.1871	3.11235
XLOC_001024	2.14676	1.87582	1.88487	1.59786	1.00748	0.972494	1.5235	0.858	1.89837	2.10043	0.856535	1.0924
XLOC_001025	22.3198	20.9325	6.04577	5.24078	3.92641	6.04158	3.82115	3.77424	4.60876	5.01879	2.4375	3.03495
XLOC_001026	0	0	0	0	0	0	0	0	0	0	0	0
XLOC_001027	0	0	0	0	0	0	0	0	0.145893	0	0	0
XLOC_001028	0.837473	0.837207	2.31623	1.87628	2.12236	0.682885	1.0698	1.13571	1.57177	0.479189	0.902188	0.911136
XLOC_001029	0	0	0	0	0	0	0	0	0	0	0	0
XLOC_001030	0	0.861752	5.10885	4.12469	11.1656	7.38051	9.8901	10.4392	7.62287	6.42301	6.83581	6.18497
XLOC_001031	0	0	0	0	0.58888	0.56843	0	0	0.462338	0	0	0
XLOC_001032	1.81374	0.511198	1.26091	0.0755962	0	1.79043	0	1.84871	2.26709	1.5554	3.94241	0.862548
XLOC_001033	1.3594	2.71794	0	0	0	0	0.0877033	0	0.0819625	0	0	0
XLOC_001034	0	0	0	0	0	1.49476	0.650466	0.659389	0	0	0	0.839529
XLOC_001035	4.14993	2.89351	0.794091	0	0.899979	0	1.63681	0	0.580596	0.736606	0.519681	1.06046
XLOC_001036	0	0	0	0	0	0	0	0	0	0	0	0
XLOC_001037	0	0	0	0	0	0	0	0	0	0	0	0
XLOC_001038	0	0	0	0	0	0	0	0	0	0	0	0
XLOC_001039	3.57813	4.19816	4.93866	5.69992	3.22446	3.22464	2.26577	2.61934	4.24737	3.24596	3.56229	3.59186
XLOC_001040	0	0	0	0	0	0	0	0	0	0	0	0
XLOC_001041	1.31986	0.879626	0	0	0	0	0	0	0	0	0	0
XLOC_001042	0	0	0	0	0	0	0	0	0	0	0	0
XLOC_001043	0	0	0	0	0	0	0	0	0	0	0	0
XLOC_001044	2.1194	1.85209	15.6605	14.5932	4.44974	6.4289	0.174163	0.548205	0.0538942	0.0554157	15.7961	18.3575
XLOC_001045	0.257115	0	0	0	0	0	0	0	0	0	0	0
XLOC_001046	0.572468	0	0	0	0	0	0	0	0	0	0.253009	0
XLOC_001047	1.07719	0.587697	1.68228	1.14042	1.98515	0.977324	1.92892	0.798814	0.865225	1.47702	2.45908	1.86034
XLOC_001048	0	0.394255	0	0.433653	1.61013	0.321582	1.67929	0	0	0.922532	1.41618	1.08369
XLOC_001049	1.68279	1.31579	1.30582	1.39813	1.95133	1.65212	1.17774	1.74972	1.51623	1.5561	1.89472	1.73089
XLOC_001050	0.188731	0.566013	1.11853	1.08366	1.27544	1.00031	0.60272	1.0862	0.688438	0.894883	1.69429	1.38294
XLOC_001051	0	0	0	0	0	0	0	0	0	0	0	0
XLOC_001052	0	0	0	0	0	0	0	0	0	0	0	0
XLOC_001053	0.409047	0	0	0	0	0	0	0.294273	0.542578	0	0	0.749331
XLOC_001054	0	1.70241	0	0	0	0	0	0	0	0	0	0
XLOC_001055	12.2171	9.22772	10.6288	12.6961	11.2545	12.0178	9.30469	9.86261	9.85303	7.82527	13.903	13.7833
XLOC_001056	3.1263	4.46316	1.19584	0.771641	1.83859	1.53764	1.62348	0.873262	0.874978	1.56603	1.47886	1.26267
XLOC_001057	0.404902	0.148461	0.222913	0	0	0.124084	0.159156	0.158831	0.201579	0.0527384	0	0.070523
XLOC_001058	0.149984	0.00147702	0.148148	0	0.253397	0	0	0	0	0	0	0
XLOC_001059	0	0	0	0	0	0	0	0	0.147202	0	0	0
XLOC_001060	0	0.0923115	0	0	0	0	0	0	0	0	0.0828969	0
XLOC_001061	20.9723	23.6912	5.38607	4.91715	2.03737	1.5391	1.78602	1.28246	4.24234	4.54592	2.63584	2.78539
XLOC_001062	0	0	0	0	0	0	0.580581	0	0.542578	0	0	0
XLOC_001063	0.0904838	0.452276	0.268129	0.692727	1.0701	0.590252	0.77057	1.04152	0.720131	0.980655	1.05599	1.32606
XLOC_001064	0.150363	0.200421	0.495077	0.460975	1.62766	0.245216	0.60125	0.51981	0.332415	0.441357	0.674928	0.964077
XLOC_001065	0.568904	0.568724	0	0	1.44174	0.927782	0.403737	0.818552	0.37731	0	0	0.521087
XLOC_001066	1.56901	0	3.45384	1.75081	2.09942	0	0.406509	1.78217	1.05363	3.21061	0	0
XLOC_001067	3.24555	1.62226	0	1.55296	0.91389	0.441077	1.15164	0.778295	1.11543	0	0.485604	1.98184
XLOC_001068	2.87046	3.29129	3.87944	2.68343	4.19278	3.15275	3.35405	3.83227	4.33642	4.35039	4.25553	3.30703
XLOC_001069	3.98854	4.44814	1.67858	2.60461	1.50886	1.79397	2.9795	2.67261	2.54347	2.20375	1.015	1.77096
XLOC_001070	0.795723	1.73502	0.990268	0.29306	0.417841	0.0596137	0.104031	0.0645337	0.0421035	0.137652	0.19726	0.245674
XLOC_001071	9.0717	7.6393	14.6566	15.4127	10.4798	4.63439	3.5892	5.26614	5.65528	4.52065	4.5683	5.92701
XLOC_001072	6.05978	6.29128	9.27378	7.35171	28.2699	13.676	13.4242	15.2441	34.9199	39.7729	14.8285	7.72381
XLOC_001073	21.5913	19.6358	30.9484	29.4519	34.2827	34.26	25.4841	27.1521	26.7053	30.3429	31.8285	27.258
XLOC_001074	10.6031	11.8897	8.65925	7.46571	8.63172	7.30006	7.37591	6.63604	11.1261	10.6977	6.85264	7.01145
XLOC_001075	32.6674	34.7205	35.8134	31.7772	32.9783	35.7848	32.9278	31.3781	48.0932	46.1402	28.0374	24.9895
XLOC_001076	130.2	145.16	119.03	119.606	88.3012	100.256	96.9218	90.9108	95.2627	91.9467	96.7822	102.214
XLOC_001077	31.5449	30.7385	30.3195	32.6779	48.1807	39.2326	40.8914	36.7149	38.0739	36.4399	50.8212	52.7768
XLOC_001078	1.0772	0.793477	0.448008	0.37979	0.263411	0.508526	0.362115	0.244722	0.357213	0.249622	0.203587	0.311578
XLOC_001079	273.931	253.987	54.7304	55.9925	71.472	65.9612	71.564	75.9202	108.879	102.283	58.4469	56.4306
XLOC_001080	1.56652	1.96553	3.3367	5.3027	2.28237	3.21714	1.44694	1.29566	1.1364	0.729954	2.00745	2.22966
XLOC_001081	46.8708	47.4521	3.29853	3.53812	4.23142	4.08448	5.07834	5.3196	8.46356	10.0175	4.06854	4.26036
XLOC_001082	115.709	122.502	71.2437	64.1752	67.6216	63.0612	78.7819	74.2646	91.5211	94.3756	63.457	58.9541
XLOC_001083	46.7447	47.1769	46.2867	46.9337	63.4342	59.0713	57.069	58.541	56.354	61.1581	89.0131	82.7114
XLOC_001084	86.4259	83.7819	142.763	125.639	184.665	147.903	112.638	119.682	102.175	102.653	249.397	262.945
XLOC_001085	0.130335	0.114468	0	0.0623636	0	0	0	0	0	0.0441424	0	0.0524402
XLOC_001086	0.430096	0.31267	0.0402954	0.0746268	0	0	0.0276632	0.0561039	0.111621	0.0793637	0.0730595	0.0713802
XLOC_001087	0.112604	0.120993	0	0	0	0	0	0.0375816	0	0.0348779	0	0
XLOC_001088	37.1383	34.6307	44.6915	48.41	37.8394	39.7943	38.9325	33.635	42.584	37.5245	35.2589	42.9064
XLOC_001089	0.34205	0.205165	0.0675728	0.130933	0.288946	0.167347	0.194196	0.246075	0.181484	0.0463388	0.245655	0.18798
XLOC_001090	0.387216	0.315295	1.03725	1.33989	22.5572	19.5536	138.864	91.1843	35.1324	67.8135	4.08505	1.34657
XLOC_001091	0	0	0.0362172	0	0.261758	0.134052	0	0.0987019	0	0.271579	0.368426	0.184165
XLOC_001092	4.90179	5.91782	0.214214	0.0660617	0	0.115942	0.205247	0	0.352034	0.0963132	0.149757	0.184652
XLOC_001093	12.1132	12.2406	11.6448	13.1105	11.8462	9.96857	11.3611	10.0066	10.3507	9.06848	9.04466	12.5606
XLOC_001094	17.8627	16.8425	8.68839	9.06511	3.37227	3.42068	5.18594	4.28355	6.59661	7.05814	3.15858	1.98319
XLOC_001095	0.253927	0.423078	0.292623	0.243002	1.20522	1.41488	1.45921	1.63016	1.08539	1.27908	0.987817	0.891573
XLOC_001096	31.0623	24.3132	128.315	112.943	46.9359	50.581	68.4768	56.7632	26.8413	44.9989	76.3309	73.2256
XLOC_001097	41.9446	46.9631	27.1375	27.6966	9.12389	11.1157	6.69759	7.09122	7.09375	7.8133	20.5219	15.3676
XLOC_001098	1.37968	1.30945	1.55688	1.44989	1.29966	1.17009	0.896913	0.918013	0.843893	0.773818	1.15717	1.42144
XLOC_001099	8.87991	7.83262	9.89859	9.74622	13.0664	11.6786	13.5388	12.1568	12.7377	11.7051	13.3168	11.5183
XLOC_001100	22.1182	25.6512	12.291	14.0252	7.60067	10.353	14.5172	11.5164	12.881	13.1484	6.45593	7.0287
XLOC_001101	65.4169	84.0278	0.48767	0.236235	0.208531	0.503223	0.788345	0.443977	23.9032	31.9376	0.22161	0.339161
XLOC_001102	0.324981	0.259903	1.09141	1.0574	24.4878	3.39192	2.58307	11.0819	1.8536	3.21393	25.6152	31.0763
XLOC_001103	64.7331	73.3522	106.445	67.3213	36.9763	49.4525	22.9088	22.6952	22.248	17.4444	89.4401	83.8562
XLOC_001104	0.233124	0.707943	0.455174	0.220382	0	0.568922	0.503949	0.167968	1.43351	0.312443	0.617083	0
XLOC_001105	0.358657	0.537815	0	0.171613	0	0.146226	0.127265	0.258022	0.118935	0.364415	0.160988	0
XLOC_001106	0	0	0	0	0	0	0	0	0	0	0	0
XLOC_001107	71.7539	73.6691	12.6864	13.9412	12.2804	14.4341	11.1034	10.029	14.092	14.9658	9.26031	8.02029
XLOC_001108	3.73402	0.7642	0	0.168834	0	0.331923	0	0	0	0	0.232808	0
XLOC_001109	1.71058	2.50176	1.80337	1.66115	1.03524	1.39472	1.60129	1.87031	1.11529	1.29701	1.37225	1.12164
XLOC_001110	1.72891	1.44927	0.618847	1.24546	0.372794	1.02173	1.54929	0.568008	0.415519	0.366526	0.265799	0.361592
XLOC_001111	40.1913	35.2766	57.8905	65.6838	32.6623	22.5112	14.647	23.5307	23.4777	21.2717	14.5493	20.1182
XLOC_001112	21.3596	21.7659	19.2466	18.8701	50.8227	42.031	30.9308	32.9867	20.5875	24.0028	23.8925	18.6463
XLOC_001113	27.542	27.2094	18.8834	17.1321	56.0438	44.9822	33.7454	29.1383	23.6927	24.3627	25.0889	18.9203
XLOC_001114	8.31421	10.4313	11.4644	11.4274	9.99303	12.2395	11.3256	12.886	15.5433	15.4969	12.5233	13.033
XLOC_001115	1.94887	1.74671	2.52244	2.44382	1.81661	2.4659	3.0046	3.38424	2.89706	2.36709	2.17187	3.01615
XLOC_001116	1.26992	1.28517	8.48258	5.05545	4.02174	4.50476	3.44752	5.38251	6.13653	9.55858	5.17964	2.48513
XLOC_001117	15.3428	18.2121	0.0265412	0	0	0.0219102	0.152552	0.0579918	2.88697	2.36612	0	0.0492232
XLOC_001118	41.9238	46.9246	1.49565	1.63016	3.27768	2.79819	2.24801	3.60836	8.22218	6.43702	1.65882	1.56027
XLOC_001119	31.7933	36.5795	0.201353	0.323422	1.40211	1.26171	1.95573	1.58605	5.82552	7.16432	1.83161	1.13073
XLOC_001120	1.40226	1.86909	0.0513	0	0.0438725	0	0.0368575	0.0373631	0.103335	0.0703592	0	0
XLOC_001121	0	0	0	0	0	0	0	0	0	0	0	0
XLOC_001122	1.23138	1.02582	4.09706	5.56835	0.520103	0.394638	0.46584	0.295289	0.635195	0.563517	0.471424	1.16534
XLOC_001123	0	0	0	0	0	0	0	0	0	0	0	0
XLOC_001124	12.2712	12.167	6.03993	6.30953	8.01968	8.46427	14.5378	13.4694	15.727	15.5846	7.99531	7.93641
XLOC_001125	0	0.30865	0.472357	0	14.1077	8.98475	80.8304	48.0766	21.5543	41.0147	2.71804	0.438015
XLOC_001126	9.6211	12.344	0.233639	0.295417	0.199811	0.385744	0.365126	0.425412	0.13649	0.160221	0.530857	0.649958
XLOC_001127	1.59937	1.59886	1.74905	2.49157	7.9616	7.03305	6.81019	7.06798	0.606134	1.31551	9.48651	8.58034
XLOC_001128	20.2928	19.2968	21.5111	18.4724	14.6337	16.9506	18.6163	18.5156	31.1847	21.1215	30.2143	18.1338
XLOC_001129	0.506441	0.164091	0	0.553196	0.38745	0.36623	0.344461	0.30261	0.593232	0.478668	0.630172	0.479707
XLOC_001130	18.3771	17.9394	15.1075	11.9023	13.6506	18.2725	16.9486	20.0706	26.1229	20.2508	14.8816	17.8528
XLOC_001131	1.8591	2.05062	0.896027	1.14682	1.02393	1.2418	1.13783	0.898181	1.24424	1.5031	1.28346	1.17101
XLOC_001132	10.2502	8.36684	0.23467	0.34426	0.0667055	0.454043	0.788244	0.641556	1.02447	0.740398	0.441152	0.197775
XLOC_001133	5.27903	5.55925	12.5402	13.2097	1.97474	1.02982	0.49367	0	2.5549	0.399936	4.8114	5.73323
XLOC_001134	4.94946	2.96874	9.63241	11.2584	0.836209	0.80717	0.351252	0	0.32826	1.67631	4.44328	4.53346
XLOC_001135	6.99921	6.59203	8.20408	5.74857	10.6286	9.70827	10.0185	9.68997	10.7044	8.06047	10.4158	7.63302
XLOC_001136	447.674	420.874	285.95	296.951	297.452	355.649	355.266	316.103	401.817	401.766	286.183	284.775
XLOC_001137	30.9083	31.82	29.3759	30.6699	53.2124	40.4038	31.4548	32.2909	22.2636	24.0276	47.3456	48.2522
XLOC_001138	68.6875	39.9918	54.7918	46.4786	79.6156	64.3609	46.6726	59.5344	47.4299	50.5923	93.2951	67.4086
XLOC_001139	0	0	0	0	0	0	0	0	0	0.84056	0	0
XLOC_001140	46.7237	44.8169	52.9029	45.2509	74.6981	53.5132	54.3085	41.6877	42.0784	46.7723	66.1208	68.6172
XLOC_001141	54.8208	66.3615	71.0878	60.7915	73.3055	66.9464	57.7122	50.747	40.5801	41.4457	84.084	91.859
XLOC_001142	7.38332	6.90078	6.19349	6.21118	5.04185	6.25928	5.80974	5.30321	5.04195	5.56333	5.0166	5.19281
XLOC_001143	1.55546	1.14836	1.44883	1.06565	2.87393	2.55817	2.29454	1.90593	1.96259	2.96211	3.21013	2.88994
XLOC_001144	0.265387	1.06121	1.57283	0.507938	0	0	0	0.763689	0.528032	0.35953	0	0.243081
XLOC_001145	2.16781	2.34317	4.65555	4.65388	2.65055	2.56523	2.40941	2.66169	1.68563	2.30033	3.31671	2.0371
XLOC_001146	0	3.1053	0	0	1.13144	0.958446	1.04099	2.57271	0.784957	3.0459	2.10863	0.0574917
XLOC_001147	0	0	0	0	0	0	0.18287	0.187098	0	0	0.45807	0
XLOC_001148	0.851782	0.79069	0.060097	0	0.205583	0.0496109	0.129533	0.13131	0.0403515	0.0824245	0.109239	0.0557278
XLOC_001149	0	0	0	0	0	0	0	0	0	0	0	0
XLOC_001150	0	0	0	0	0	0	0	0	0	0	0	0
XLOC_001151	0	0	0	0	0	0	0	0	1.0577	0	0	0
XLOC_001152	0.891421	1.35465	1.82905	1.24999	2.01335	1.69213	1.71923	1.06371	1.50214	1.46829	2.81713	3.38074
XLOC_001153	1.20716	3.62032	0	1.15522	0	0	0	0	0	0	0	0
XLOC_001154	3.06268	3.42567	2.9991	4.36679	3.79497	3.5435	3.36707	4.15073	1.99193	1.54782	4.7874	4.75486
XLOC_001155	0	0	0	0	0	0	0	0	0	0	0	0
XLOC_001156	0.583073	0.478869	0.859411	0.56883	0.754727	0.679315	0.315572	0.776297	0.507288	0.475995	0.447683	0.503916
XLOC_001157	0	0	0	0	0	0	0	0	0	0	0	0
XLOC_001158	1.78359	0	0	0.853427	0	0.72718	0.632886	0	0.591459	0.604075	0	0
XLOC_001159	1.59517	1.77185	3.58898	2.71385	3.7431	4.84158	5.03136	4.7816	3.35019	3.54171	6.5237	6.0879
XLOC_001160	0	0	0	0	0.519385	0.501348	0	0	0	0	0	0
XLOC_001161	0	0	0	0	0	0	0	0	0	0	0	0
XLOC_001162	0	0	0	0	0	0.0206881	0.232617	0.235808	0.0414156	0.222027	0	0.300852
XLOC_001163	143.986	146.17	0.115298	0.0368197	0	0	0.193907	0.0556074	2.43732	1.91025	0.104167	0.0355163
XLOC_001164	0	0	0	0	0	0	0	0	0	0	0	0
XLOC_001165	0	0.472416	0	0	0	0	0	0	0	0	0	0
XLOC_001166	34.6241	34.835	18.6348	13.806	14.4368	15.2023	19.0589	19.001	29.1459	28.8656	14.346	14.6372
XLOC_001167	0.983337	1.14686	1.29507	0.627353	1.66134	0.400912	0.581542	1.06114	0.760867	1.88723	0.88277	0.800981
XLOC_001168	0	0	0	0	0	0	0	0	0	0	0	0
XLOC_001169	0	0	0.592593	0	0	0.978388	0	0	0.39789	0	0	0
XLOC_001170	0	4.40409	13.0547	12.6478	3.72153	0	6.25294	3.16936	2.92182	0	7.90987	28.2464
XLOC_001171	0.194861	0	0.096238	0.0932385	0.329216	0.476675	0.69144	0.630833	0	0.197989	0.962127	0.535447
XLOC_001172	13.5213	15.3966	19.4174	17.2244	8.50551	10.8254	6.51317	8.59469	11.0079	10.6854	12.7542	11.8334
XLOC_001173	1.07909	0.609823	0.958532	0.892602	0.727518	0.39175	0.58709	0.677523	0.598471	0.906206	0.708459	0.414752
XLOC_001174	3.15651	3.62346	9.01235	5.61316	2.74513	3.26129	3.0158	2.78742	2.48682	1.35459	3.47378	2.86203
XLOC_001175	0	0	0	0	0	0	0	0	0	0	0	0
XLOC_001176	1.73216	3.46323	11.9767	4.97291	8.77944	4.23728	6.14637	12.4614	6.89286	10.5598	7.77506	12.6926
XLOC_001177	9.02891	9.02605	0	5.7603	5.08477	2.45409	4.27173	4.33033	11.9764	14.2705	10.8074	8.27002
XLOC_001178	6.69475	5.77141	46.0757	46.322	13.3549	18.4308	13.5773	14.2133	14.062	15.4665	19.3983	23.3518
XLOC_001179	2.77149	4.18206	9.50402	8.05683	0.132521	0.170559	0.0742211	0.112859	1.17917	1.20432	0.375554	0.431073
XLOC_001180	36.8977	36.886	79.8789	75.7843	66.3731	59.2519	44.6083	42.6497	53.1986	42.627	73.58	73.3368
XLOC_001181	9.8164	12.3317	11.9273	11.223	16.3279	11.3337	8.93927	10.8743	10.2266	9.59151	22.4211	20.2504
XLOC_001182	22.5102	21.114	8.01547	8.82944	7.51227	8.70167	15.3044	11.1559	17.1042	16.829	5.5884	5.24364
XLOC_001183	0	0	0	0	0	0	0	0	0	0	0	0
XLOC_001184	1839.1	1822.45	18.5447	22.7581	13.2812	20.1204	17.049	7.78573	12.1114	11.9258	23.3203	22.6114
XLOC_001185	34.5561	32.4155	60.5291	59.1128	60.3528	61.0763	58.7901	61.5733	35.9423	40.5343	54.4075	43.6202
XLOC_001186	15.0606	16.953	19.8919	16.439	17.2871	16.7831	20.0668	17.4215	15.6518	17.4699	21.223	19.7947
XLOC_001187	983.067	893.083	1790.59	2260.62	3752	3649.97	3195.28	2615.14	1809.32	1819.07	3897.02	3419.49
XLOC_001188	147.512	169.149	0.237654	1.48016	0.326644	0.788252	0.548831	0.332768	1.53872	0.392885	0.347131	0.637391
XLOC_001189	0	0	0	0	0	0	0	0	0	0	0	0
XLOC_001190	8.78645	8.74825	1.53981	1.32229	1.70594	1.58892	2.28804	2.21747	3.40713	3.52781	1.59029	1.29805
XLOC_001191	0	0	0	0	0	0	0	0	0	0	0	0
XLOC_001192	0.0122621	0.379767	0	0	0	0	0	0	0	0	0	0
XLOC_001193	11.7568	10.3746	10.1075	8.9591	7.96974	10.6518	7.77698	8.24913	5.82396	7.17715	5.86356	5.84962
XLOC_001194	34.8854	35.109	17.1809	16.2886	13.5341	14.1935	15.9542	15.0478	20.8003	18.7475	12.3931	10.5185
XLOC_001195	31.4046	24.9685	23.7537	27.5343	6.25863	7.38141	11.7149	11.9663	7.75915	11.9945	14.4078	12.8609
XLOC_001196	0.154189	0	0.152302	0.29511	0.130251	0.125727	0.109424	0.665551	0	0	0.13842	0.141229
XLOC_001197	6.4191	3.3774	0	0.323312	0	0	0.239762	0	0.224068	0	0	0
XLOC_001198	2.5503	3.04522	7.25403	7.23132	3.84991	6.35415	2.84889	2.95592	3.38283	2.91114	5.91448	7.72158
XLOC_001199	5.97093	5.29763	25.9199	25.2337	18.1691	13.0021	8.46153	7.63365	6.29665	7.94413	38.3357	29.9691
XLOC_001200	0.156381	0	0	0	0	0	0	0	0.103716	0.211856	0	0.0612629
XLOC_001201	0.0699571	0.209805	0	0	0	0.0570438	0	0	0.0463971	0.0473868	0	0
XLOC_001202	0	0	0	0	0	0	0	0	0	0	0	0
XLOC_001203	0	0	0	0	0	0	0	0	0	0	0	0
XLOC_001204	0.971349	1.0353	0	0.165179	0.0745949	0.288018	0.0626675	0.127054	0.0585655	0.299074	0	0.323529
XLOC_001205	2.36101	2.23344	0	0	0	0	0.0689981	0.211301	0.0917989	0.364304	0	0
XLOC_001206	19.1062	17.5698	2.13272	3.57249	2.45283	3.0704	1.47792	1.86552	3.22834	3.30839	1.2396	1.76941
XLOC_001207	1.10094	1.08459	0.685859	0.747543	0.696536	0.507409	0.985537	0.757596	0.949809	1.03756	0.77918	0.794994
XLOC_001208	7.70072	5.17884	3.01992	3.34973	2.95689	2.96838	1.88792	1.90482	1.76434	2.54213	2.13679	3.33437
XLOC_001209	2.49995	2.67454	1.34368	2.01465	1.96162	1.44291	2.4517	2.48907	2.25963	2.26366	1.82283	2.00862
XLOC_001210	0	1.00275	0.926337	0.892594	3.18605	1.59142	0	0	1.57636	1.10931	2.21885	0.709808
XLOC_001211	1272.01	1367.16	1328.41	1225.49	1182.94	1177.4	1062.67	970.062	877.282	882.404	1243.34	1185.08
XLOC_001212	8.80263	8.29361	2.74952	3.26041	3.42268	4.92016	4.90939	4.70132	4.72465	4.50133	2.59852	3.2478
XLOC_001213	43.6612	37.9659	31.3904	30.3318	48.7042	43.6911	47.8588	48.6728	63.566	57.6903	44.2357	49.5908
XLOC_001214	1.86181	1.37418	14.8927	13.1665	4.41936	3.90786	3.30876	4.52209	4.00838	3.69352	5.5044	7.12021
XLOC_001215	26.2979	22.7182	5.09719	4.89084	1.88619	2.46804	3.80302	3.17696	6.08802	4.6382	1.46996	1.36345
XLOC_001216	11.5442	12.8124	32.1875	33.8786	33.9973	28.4424	20.6779	20.5474	17.4758	17.7149	59.1439	60.36
XLOC_001217	2.80821	3.39217	0.366265	0.783821	1.18611	0.538339	1.25578	1.0943	1.24164	1.42664	0.420168	0.216107
XLOC_001218	279.651	261.027	187.009	184.865	180.834	174.522	176.229	147.044	134.637	132.404	164.508	193.38
XLOC_001219	21.9722	24.0966	18.3011	17.3143	20.2407	17.8938	16.6428	16.7961	15.1121	15.0515	18.6891	17.5707
XLOC_001220	3.5608	4.33297	0.734578	0.734467	1.82786	1.30641	1.99699	1.36301	1.60129	1.4181	1.06883	1.48977
XLOC_001221	0	0	0	0	0	0	0	0	0	0	0	0
XLOC_001222	18.4687	19.4017	1.4085	2.20831	1.31685	1.0046	0.942091	0.757951	2.11756	1.7907	0.833365	1.61783
XLOC_001223	10.827	17.2661	13.75	15.0483	16.7677	11.9814	14.2696	16.8762	12.6517	15.7154	12.2653	14.4032
XLOC_001224	0.335557	0.237491	0	0	0	0	0	0	0.0284454	0	0	0
XLOC_001225	7.64028	7.47227	7.60246	8.6919	5.18187	7.72182	6.46062	6.97592	5.22113	5.07263	3.87494	4.6335
XLOC_001226	0.834902	1.35555	0.107804	0	0	0	0	0.142144	0.131042	0	0.177376	0.501858
XLOC_001227	0.895453	0.584167	0	0	0.098726	0	0.0829402	0.0840779	0.361351	0.183967	0	0
XLOC_001228	3.50164	3.66019	3.70207	2.87416	8.00617	4.68189	3.99755	5.30859	3.12847	2.98707	6.80618	4.07478
XLOC_001229	0.325195	0.260073	0	0.0622407	0.164824	0	0.0923132	0.327528	0.0862706	0.0440554	0	0.119145
XLOC_001230	21.2796	21.9666	14.3839	15.099	9.57684	13.5269	16.1007	13.0211	15.6062	16.9408	10.118	14.121
XLOC_001231	9.29712	9.60886	2.97723	2.02218	3.27268	2.04996	3.23679	2.49439	2.81365	3.64726	2.58603	3.4363
XLOC_001232	3.79778	3.14838	1.18944	0.827339	1.01722	1.13296	2.45416	1.77702	1.98635	1.58951	0.665244	0.820151
XLOC_001233	30.3728	32.4121	28.2899	27.0488	29.7303	27.995	27.9473	28.5801	27.3625	29.1981	25.1151	26.6299
XLOC_001234	4.67621	4.91767	2.21266	2.72289	1.97091	1.86048	1.44236	1.83598	1.51671	1.56645	2.2026	2.01019
XLOC_001235	9.90549	8.98425	20.4261	21.2085	22.1694	27.6545	19.5528	20.1513	11.9644	11.5848	21.5184	22.0773
XLOC_001236	51.6064	48.1791	24.5342	21.4585	37.2602	31.6407	30.5278	31.0748	38.8106	36.6138	29.1785	24.0473
XLOC_001237	6.18313	5.16858	2.77624	2.82189	2.37065	4.4777	3.01018	3.77112	4.97949	3.73156	2.19881	1.71877
XLOC_001238	22.1989	25.4572	40.9016	35.2628	75.2196	70.8856	82.8214	83.8769	44.9148	51.1921	52.2816	49.212
XLOC_001239	13.6793	14.523	33.8321	32.4732	54.3738	52.3126	69.4225	64.7677	31.226	37.4588	42.6954	41.8137
XLOC_001240	43.8668	41.6145	17.8718	17.6474	19.2634	17.9789	25.0915	24.8538	32.9939	30.5485	15.4337	15.7522
XLOC_001241	4.96748	4.80636	4.00554	4.62161	2.78323	3.9619	4.75508	3.94161	4.68054	4.16136	3.65889	4.70908
XLOC_001242	0	0	0	0	0	0	0	0	0	0	0	0
XLOC_001243	0	0	0	0	0	0	0	0	0	0	0	0
XLOC_001244	0	0	7.28136	11.7574	12.4542	4.00725	1.74381	3.53546	1.62966	1.66443	13.2353	2.25066
XLOC_001245	12.1657	14.1142	70.6505	46.9758	135.954	104.349	217.846	184.837	160.102	199.334	43.7255	80.826
XLOC_001246	0	0	0.147701	0	0	0	0	0	0	0	0.268476	0
XLOC_001247	0	0	0	0	0.126891	0	0	0	0	0	0	0
XLOC_001248	0	0	0	0	0	0	0	0	0	0	0	0
XLOC_001249	4.63545	3.88656	1.0339	0.572389	0.126316	0	0.106118	0.215148	0.297516	0.101287	0.268476	0
XLOC_001250	2.93543	3.74964	0.483251	1.24851	0.137761	0	0.347201	0	0	0	0.292802	0.149372
XLOC_001251	0	0.33545	0	0	0.283461	0	0	0.241403	0	0	0	0.614706
XLOC_001252	2.06577	0.121855	0	0.978631	1.16997	1.75345	0.0521432	0.992413	1.63007	0	0.38601	0
XLOC_001253	9.68471	4.84082	4.78309	4.63402	4.09057	15.7941	3.4365	10.4509	3.21156	0	13.0414	8.8707
XLOC_001254	1.96018	1.95956	0.968097	1.56321	2.48379	1.86475	3.94144	3.29041	1.95006	1.99165	2.34628	0.299238
XLOC_001255	1.20254	0.583746	0	0	0	0	0.0670968	0	0.12541	0	0	0
XLOC_001256	0.469588	1.40147	0	0.350853	0	0	0	0.263755	0	0.496684	0	0
XLOC_001257	9.11028	9.78704	0.26862	0.260248	1.03378	0.332625	0.385991	0.293464	0.541087	0.460524	0.122068	0.124545
XLOC_001258	1.96667	1.52915	15.325	11.0832	0.738375	0.890916	0.930468	2.04367	1.15942	1.77622	2.15788	2.40183
XLOC_001259	0.646434	7.3375	0	0	0	0	0	0	0	4.01702	0	3.45055
XLOC_001260	0	0	0	0	0	0	0	0	0	0	0	0
XLOC_001261	1.595	0.93164	0	1.11482	0.483358	0.251936	0.629727	0.43358	0.208458	0.441297	0	0
XLOC_001262	0.214953	1.13851	0.456009	0.245145	0.259686	0	0.229762	0.121977	0.107864	0	0.301725	0
XLOC_001263	6.77961	6.7177	1.27753	1.9151	1.61155	1.09345	1.74693	1.40602	2.07305	1.59371	1.51865	2.05533
XLOC_001264	0	0	0	0	0	0	0	0	0	0	0	0
XLOC_001265	0.509129	0.374605	0.28737	0	0.1259	0.0623567	0.0518964	0.104649	0.148117	0.147801	0.0657929	0.201716
XLOC_001266	0	0	0	0	0	0.189033	0	0	0	0	0	0
XLOC_001267	4.66442	3.62673	0	0	0.437806	0.422602	0	0.372848	1.03118	1.05318	0	0
XLOC_001268	0	0	0	0	0	0	0	0	0	0	0	0
XLOC_001269	0	0	0	0	0	0	0	0	0	0	0	0
XLOC_001270	1.45515	0	0	0	0	1.18655	0	0	0	1.97135	0	0
XLOC_001271	12.0023	6.80359	6.19119	2.77521	9.64857	4.31196	5.08978	5.85706	10.0748	8.29541	3.81359	3.86023
XLOC_001272	0	0	0	0	0	0	0	0	0	0	0	0
XLOC_001273	18.1948	10.7856	6.43567	5.45894	2.83605	4.90329	7.66451	7.78521	5.32311	3.18835	9.62112	6.92133
XLOC_001274	6.56148	5.65953	1.32269	4.8789	2.08773	6.60839	4.2014	3.54837	3.28741	5.89754	6.31726	6.17731
XLOC_001275	6.75378	9.82709	7.05576	1.42276	14.2786	13.3461	15.233	23.5929	9.88608	19.7253	23.7491	13.0482
XLOC_001276	0.426678	0.426543	0	0	0	0	0	0	0	0	0	0
XLOC_001277	1.54372	1.19897	1.00014	0.999394	1.28648	1.49577	0.984804	0.473008	0.919953	1.27724	1.33465	1.62807
XLOC_001278	0.339586	0	0.167715	0.162488	0	0	0	0.244302	0.112611	0	0.152428	0
XLOC_001279	6.09165	7.35841	0	0	0	0	0	0	0.336677	0.171929	0	0
XLOC_001280	3.06894	1.27287	1.77851	3.6685	4.02269	3.01045	3.9997	1.93573	3.72267	5.34523	4.31602	4.61998
XLOC_001281	3.37269	0.695643	2.34357	0.822227	2.30076	2.73713	2.44873	1.54326	2.0717	1.20523	2.81977	3.3948
XLOC_001282	37.6453	37.9895	309.662	333.993	106.905	173.415	60.6609	67.1787	80.5065	58.6239	249.851	322.517
XLOC_001283	0	0.197521	0	0.189083	0	0	0	0	0	0	0	0
XLOC_001284	0.0872152	0	0.516887	0.751166	0.515724	0.142233	0.123789	0	0.231372	0.0590769	0.548069	0.798847
XLOC_001285	0	0	0	0	0	0	0	0	0	0	0	0
XLOC_001286	1.47856	1.00354	1.80462	1.68372	0.913851	1.3268	1.6228	0.720797	0.902362	0.797236	1.29691	1.75001
XLOC_001287	23.1743	26.8113	46.0975	46.2934	79.4415	51.5808	40.7515	43.843	47.1257	49.8457	61.2412	59.1651
XLOC_001288	0.452593	0.419313	0.414313	0.886153	0.354326	0	0	0	0	0	0.376549	0.384191
XLOC_001289	0	0	0	0	0	0	0	0	0	0	0	0
XLOC_001290	7.57294	4.31462	3.76247	1.7675	4.19776	8.74304	1.47167	3.24529	6.51602	2.86406	8.16068	2.47764
XLOC_001291	1.32575	0.441776	1.74603	0	0	0	0.313617	0.31792	0	0.598681	0.396721	0.809546
XLOC_001292	4.50788	3.31086	3.27138	2.64118	2.40915	1.72536	2.21981	2.31644	2.31856	2.6796	1.32142	1.01118
XLOC_001293	1.90868	0.851971	1.00489	0.890408	1.30886	0.364669	0.707375	2.04438	1.24441	0.98289	0.489942	0.26557
XLOC_001294	0.26482	0	1.00044	1.84081	0.327328	0.795039	0.387022	0	1.25554	0.240233	0.543605	0
XLOC_001295	5.8229	9.38843	3.69748	2.78027	1.75674	3.55127	3.87425	1.90299	10.138	4.38162	0.442172	1.72959
XLOC_001296	4.30136	5.77538	2.13333	1.30838	1.51355	3.05993	1.47088	1.79192	3.86056	2.46007	2.18001	0.748385
XLOC_001297	8.42524	5.61504	2.77404	2.68758	0	2.29001	1.99306	2.0204	11.1756	9.51166	2.52119	0
XLOC_001298	0.294013	0.640251	0.58493	0.33877	0.424409	0.537773	0.731822	0.86719	1.19687	0.919166	0.117765	0.213566
XLOC_001299	0	0	0	0	0	0	0	0	0	0	0	0
XLOC_001300	1.74741	1.54147	2.61894	1.76324	1.94991	2.81495	2.55793	2.22512	2.58067	2.65654	1.43789	1.61403
XLOC_001301	1.36623	1.14851	2.05493	3.06061	2.38692	3.08892	2.90873	3.21669	2.92427	3.07078	1.58888	1.59268
XLOC_001302	3.24378	3.1887	4.0051	2.58685	2.64883	3.2181	4.56091	4.00603	5.34251	4.54095	1.60162	1.5846
XLOC_001303	5.09737	5.07118	8.69212	7.59281	5.84189	6.00047	6.68508	6.82796	7.29352	6.87673	4.2875	4.41168
XLOC_001304	0	0	0	0	0	0	0	0	0	0	0	0
XLOC_001305	8.12267	8.75453	8.28187	10.3597	12.2971	13.4216	14.1271	13.0651	6.6517	7.52568	9.4777	7.91439
XLOC_001306	4.27731	4.76464	3.6214	4.91194	6.50385	6.57694	10.1473	10.2865	2.75576	2.9801	2.30392	3.80586
XLOC_001307	0.299061	0.597933	0.578078	0.286194	0.141252	0	0	0	0.277246	0.169896	0.939666	0.273925
XLOC_001308	0	0	0	0	0	0	0	0	0	0	0	0
XLOC_001309	34.1629	34.3414	24.6335	21.7044	29.8298	37.8369	44.6635	45.0526	50.5335	56.2223	35.1104	28.139
XLOC_001310	13.0059	12.1591	11.1814	8.87377	14.8524	14.4348	20.7674	18.28	19.4081	20.6378	14.919	12.9055
XLOC_001311	2.71401	2.07639	3.05393	2.50701	1.54611	2.75606	3.9904	4.31425	4.23741	3.63769	1.93536	1.36903
XLOC_001312	0	0	0	0	0	0	0	0	0	0	0	0
XLOC_001313	0	0	0	0	0	0.408694	0	0.180289	0.166207	0	0.449952	0
XLOC_001314	0	0	0	0	0.257295	0.165573	0.0720516	0.148189	0.202006	0	0.729153	0.185988
XLOC_001315	0.375538	0.466683	0.694387	0.888506	1.25609	0.63224	1.00411	1.10236	0.669829	1.07681	1.74503	1.20134
XLOC_001316	2.43	3.79695	1.1724	2.39753	1.6157	0.580698	1.0108	0.853885	0.629755	1.18759	1.06553	0.948917
XLOC_001317	0.0984968	0.0984656	1.84854	2.54499	0.665639	1.60631	0.279603	0.425158	0.261301	0.266875	2.47586	3.24785
XLOC_001318	4.88063	7.20226e-05	26.7004	3.1667	3.4245	0.851334	5.72837	0.00518707	3.82145	6.73105	32.1309	0.0161343
XLOC_001319	9.27424	8.00586	0.765324	1.19912	0.138064	0.229165	0.351911	0.391932	0.325188	0.274978	0	0.371829
XLOC_001320	1.56975	5.65035	0	1.01052	0.867542	0	0	1.1293	2.13967	0	0	0
XLOC_001321	0.786149	0.39295	0.905949	0.438857	0.38739	0.534196	0.511419	0.518434	0.738638	0.177504	1.05862	0.660066
XLOC_001322	0.914057	0.876054	0.340409	0.25514	0.42835	0.363506	0.230837	0.352235	0.475372	0.640362	0.103678	0.0726894
XLOC_001323	5.4994	3.94209	1.03395	1.72056	1.07365	1.14991	1.18085	1.1031	1.31603	2.1498	1.09114	1.47874
XLOC_001324	0	0	0	0	0	0	0	0	0	0	0	0
XLOC_001325	0.110356	0.330963	0	0	0.0932229	0.0899855	0.078317	0.0793913	0.146381	0	0.297209	0.303241
XLOC_001326	0	0.499787	0.987655	0	0	0	0.709599	0.719333	0.331575	0.338648	0	0
XLOC_001327	5.61092	7.71063	8.68343	8.99981	9.77046	8.24845	10.4303	10.5695	9.26692	9.88244	9.78386	10.1479
XLOC_001328	0.721583	1.13506	0.187364	0.149477	0.140535	0.152405	0.0685656	0.221973	0.326725	0.152659	0.140956	0.113457
XLOC_001329	1.91184	3.57144	6.78263	4.76221	4.96642	5.9571	7.88929	5.75525	3.52197	4.25254	4.80415	4.81787
XLOC_001330	0	0	0	0	0	0	0	0	0	0	0	0
XLOC_001331	0.668996	0.8187	1.73376	2.2978	0.262484	0.924411	1.68751	1.05942	1.41569	1.15274	0	0.913332
XLOC_001332	2.63978	2.49025	11.7976	11.0753	10.8148	16.6937	15.2619	15.4208	8.83678	9.31643	7.77195	11.8367
XLOC_001333	1.53208	1.02106	11.8544	13.9285	12.5108	24.4997	20.2355	22.4113	9.93529	11.6462	8.86363	14.8906
XLOC_001334	1.92248	0.257703	4.75051	6.62481	3.44294	3.86711	2.56606	1.622	1.83574	1.2579	2.18448	3.28759
XLOC_001335	3.6716	3.11356	4.34932	4.47816	3.28805	4.46666	3.73449	3.41827	3.15129	3.5111	5.1116	3.363
XLOC_001336	1.90493	2.18801	9.88229	10.976	7.45714	7.37631	5.42476	5.03326	4.09535	5.05525	9.35511	10.3767
XLOC_001337	0	0	0	0	0	0	0	0	0	0	0	0
XLOC_001338	5.52704	6.46459	5.13183	4.8661	4.62226	3.78572	3.80473	3.61835	3.26244	3.25715	6.89688	9.26435
XLOC_001339	51.5541	54.5852	70.7333	70.5154	156.946	100.401	75.4595	86.0823	85.9141	89.3667	142.776	120.701
XLOC_001340	0	0	0	0	0.62573	0.375633	0.67593	1.30251	0	0.32045	0	0.168402
XLOC_001341	5.89815	7.43253	1.65283	3.4168	0.824047	1.49123	1.48289	1.34793	1.63732	2.12865	0.291854	0.44805
XLOC_001342	9.64486	10.5674	2.34707	3.34246	1.37403	1.957	2.16996	2.50974	3.8575	3.69698	0.618853	0.578822
XLOC_001343	8.58606	10.3299	6.11419	6.01918	11.5121	12.944	14.1351	12.7488	10.8923	11.4966	14.6093	13.7627
XLOC_001344	20.9922	20.5591	21.6983	22.3924	25.4028	26.21	26.9196	26.8505	27.3802	28.3151	30.798	30.9207
XLOC_001345	0.226003	0.275393	0.148825	0	0.0775704	0.149753	0.160389	0.198184	0.0609016	0	0.202889	0.276009
XLOC_001346	7.94247	9.23947	0.416963	0.208313	0.275825	0.688418	0.0430242	0.313201	0.507394	0.865818	1.13687	0.847375
XLOC_001347	0.685263	0.498215	0.123068	0.0679558	0.299932	0.752741	0.176842	0.537802	0.165266	0.126593	0.701234	0.570605
XLOC_001348	0	0	0	0	0	0	0	0	0	0	0	0
XLOC_001349	0.326697	0.326594	0.242024	0.0781604	0	0.0665982	0	0.0587574	0.0541683	0	0	0
XLOC_001350	0	4.91709	13.9683	33.2507	23.7469	22.0249	5.01788	12.203	9.37539	2.79832	12.6951	51.2319
XLOC_001351	6.60168	7.79285	4.81717	5.74203	5.98887	7.59151	5.13498	5.99199	4.27019	4.67677	4.23311	5.0919
XLOC_001352	13.8436	13.9907	10.692	11.3368	12.4502	10.8214	10.9638	9.86139	9.62584	10.4088	10.6082	11.3371
XLOC_001353	0	0	0	0	0	0	0	0	0	0	0	0
XLOC_001354	6.20644	4.68112	7.63104	7.91198	9.61094	11.6253	6.00753	9.20535	7.31912	9.77885	22.6074	15.7445
XLOC_001355	0.728628	0.62434	0.102816	0	0	0	0	0	0.207104	0.282029	0.0934443	0
XLOC_001356	0.224465	0	0.886873	0	0.189617	0.183032	0.159298	0.645932	0.446612	0	0	0.616797
XLOC_001357	2.36948	2.22876	1.35409	1.51715	1.14588	1.26388	1.61577	1.2031	1.50955	0.959047	1.42725	1.51266
XLOC_001358	1.29822	1.62226	1.28233	2.17414	1.37083	1.52896	0.555666	0.700465	2.15252	1.75875	3.20499	0.891827
XLOC_001359	0	1.37416	1.35777	0	6.06508	1.12086	0.975518	2.9667	0	0	3.58072	0
XLOC_001360	4.70389	3.37394	5.70035	3.76266	8.85141	2.75404	6.75118	3.70638	2.89203	4.11493	7.39083	4.77744
XLOC_001361	0	0	0.0798838	0	0	0	0.057394	0	0	0	0.0726025	0
XLOC_001362	1.35912	1.18885	0.671243	0.379355	0	0.0461768	0.040189	0.0407403	0.0375583	0.0767189	0.152515	0.259351
XLOC_001363	0.125303	0.320313	0.123769	0.24402	0.211699	0.102173	0.177849	0.225361	0.166207	0.127314	0.056244	0.239564
XLOC_001364	0	0	0	0	0	0	0	0	0	0	0	0
XLOC_001365	0	0	1.92983	0	0	0	0.462173	0	0.431921	0.441134	0	2.98254
XLOC_001366	3.43008	2.65626	10.5938	10.0324	4.44836	5.23932	4.45707	4.69199	4.26145	3.92693	5.42127	9.82359
XLOC_001367	0	0	0	0	0	0	0	0	0	0	0	0
XLOC_001368	0.313754	0.156827	0.309914	0	0.397564	0.767515	0.333995	0	0.104044	0	0.422499	0.574765
XLOC_001369	0.469589	1.40832	0.742146	0.449385	0.714031	0.995561	1.26637	1.21618	0.249153	0.508936	0.168625	0.172048
XLOC_001370	6.47443	6.35351	3.39466	2.70557	2.97984	2.72749	2.86116	2.01266	2.87506	2.17236	1.32953	3.08077
XLOC_001371	16.1676	17.5428	2.8679	0.801802	0.618538	0.780418	1.61047	1.9949	0.929725	1.52285	1.20905	0
XLOC_001372	0	0.474239	0.312389	0.756632	0.13358	0.128941	0	0.11376	0.209751	0.642674	0.567831	0.289678
XLOC_001373	3.38385	3.88276	0.599247	0	0	0	0	0.260964	1.12387	0	0.304136	0
XLOC_001374	1.84483	1.1624	0	0	0.468808	0	0.674315	0.497096	1.31698	0.292805	0.552052	0
XLOC_001375	0.768269	1.66039	2.55413	3.14958	4.54608	3.31021	1.11028	2.26791	1.24106	2.2698	4.13611	4.11353
XLOC_001376	1.14319	0.349307	0	0.867753	0	1.49479	1.84013	2.11004	0	0	0	0
XLOC_001377	0	0	0	0	0	0	0	0	0	0	0	0
XLOC_001378	0	0	0	0	0	0	0	0	0	0	0	0
XLOC_001379	2.9909	3.08641	5.2415	4.70882	3.09707	2.59616	1.78022	1.4576	1.85566	1.37242	3.98422	3.97671
XLOC_001380	3.27538	3.63816	5.39216	5.57237	1.22972	2.67078	0.516546	0.523632	1.68957	1.72561	2.28698	1.66671
XLOC_001381	0.305522	0.916277	0.603567	0.292378	0.258089	0.249127	1.51775	0.659389	0	1.24171	0.548553	1.11937
XLOC_001382	0.291574	0.291481	0.947912	0.976602	5.15408	1.30764	1.345	2.83178	1.49605	3.16005	1.87431	1.0255
XLOC_001383	8.06579	8.11559	2.32804	2.35573	1.85824	1.58017	2.41602	2.03469	4.481	3.26392	0.987395	1.00743
XLOC_001384	2.4106	1.46789	2.11211	0.623249	2.2065	2.22759	1.65865	1.43481	1.51902	1.4915	2.09484	2.77621
XLOC_001385	0	0	0	0	0	0	0	0	0	0	0	0
XLOC_001386	0.831253	0.805326	0.486187	0.187849	0.312297	0.411179	0.0922472	0.469397	0.272044	0.523268	0.335164	0.11336
XLOC_001387	0	0	0	0	0.90401	0	0	0.38494	0	0	0.565317	0
XLOC_001388	0	0	0	0	0	0	0	0	0	0	0	0
XLOC_001389	0	0	0	0	0	0	0	0.198922	0.183385	0	0	0
XLOC_001390	0	0.845794	0	0.809661	0	0	0.60043	0.608667	0.561128	0.573097	0	0
XLOC_001391	2.22972	2.89384	16.1992	19.674	29.3378	36.274	28.1363	34.3911	24.8126	22.3166	19.8815	18.627
XLOC_001392	0	0	0	0	0	0	0	0	0	0	0	0
XLOC_001393	0	0	0	0	0.309707	0	0	0	0	0	0	0
XLOC_001394	0	0	0	0	0	0	0	0	0.177438	0	0	0
XLOC_001395	0	0	0	0	0	0	0	0	0	0	0	0
XLOC_001396	0	0	0	0	0	0	0	0	0	0	0	0
XLOC_001397	4.34113	2.49131	24.309	15.5087	24.2325	9.862	23.0372	16.2605	19.1493	12.0751	4.96907	12.9232
XLOC_001398	0	0.402268	0.794941	0.770165	0	0	0	0.578975	0.266878	0	0.722484	0
XLOC_001399	22.1973	8.29482	0	13.182	0	0	6.22975	4.84367	0	0	0	0
XLOC_001400	1.84338	1.47423	0.728326	2.11688	2.18006	0.751555	2.6164	1.59137	2.32288	1.7481	2.15131	2.02613
XLOC_001401	2.66042	2.53666	2.17202	1.76895	3.08207	2.16824	1.94878	2.0755	2.10497	1.80283	2.17098	2.1275
XLOC_001402	2.43343	2.69159	1.90836	3.09525	2.06005	2.21681	1.98499	1.99592	2.27789	3.77423	1.50727	2.34201
XLOC_001403	0	0	0	0	0	0	0.122264	0	0	0	0	0
XLOC_001404	0	0	0	0	0	0.137978	0.120086	0.121733	0	0	0	0.15499
XLOC_001405	0.899903	0	0	0	0	0	1.27728	0	0	0	0	0
XLOC_001406	0.198375	0	0.397485	0.379681	0.167577	0.64703	0	0.287853	0.663452	0.134373	0.178087	0.185718
XLOC_001407	0	0	0	0	0	0	0	0	0	0	0	0
XLOC_001408	0	9.45677	0	0	0	0	0	0	0	0	0	0
XLOC_001409	0.840145	3.97542	2.35479	0.655143	2.50813	2.03733	4.12334	4.19041	5.09762	5.43254	3.56817	4.08823
XLOC_001410	12.3064	12.61	14.397	10.8936	10.6881	12.6062	14.3012	12.7543	13.8241	14.4056	12.3597	12.5753
XLOC_001411	17.2021	18.4237	15.4039	16.1397	19.4224	16.5588	21.079	18.1254	20.1103	22.5441	19.1883	22.6357
XLOC_001412	10.1479	10.0639	8.98241	9.41852	6.38719	8.49989	8.61131	7.33844	9.08046	7.60641	4.48736	4.95918
XLOC_001413	3.86961	5.13686	1.60197	1.13795	1.16418	1.09236	0.791835	1.20301	1.30837	1.43431	1.48637	1.26428
XLOC_001414	19.3292	16.6411	21.9358	23.8241	13.4768	18.7965	17.8867	19.4711	19.3701	16.3704	8.3583	8.9279
XLOC_001415	36.7923	39.8914	31.9237	32.5462	27.4039	34.1486	37.5242	40.9973	48.9469	50.7959	30.7525	34.1767
XLOC_001416	0	0	0	0	0	0	0	0	0	0	0	0
XLOC_001417	21.9599	21.5873	12.4816	12.9191	13.4129	9.52784	10.6552	12.541	10.0839	10.2275	9.50416	7.41198
XLOC_001418	0.854955	0.912115	0.0917376	0.0444326	0.0784436	0.0378598	0.0988513	0.0334024	0.123174	0.345955	0	0
XLOC_001419	3.97688	3.12489	3.83194	4.19284	3.36832	3.78957	3.11266	3.49494	4.65201	3.6007	3.35442	3.46003
XLOC_001420	0	0	0.791328	0.517652	0	0	0.287395	0	0	0	1.01598	0.464686
XLOC_001421	18.554	19.4462	0.148598	0.143967	0.127083	0.0358902	0	0.108228	0.0291916	0.0894428	0.202581	0.0403153
XLOC_001422	0	0	0.0939268	0.0909994	0	0	0.0674835	0	0	0	0	0
XLOC_001423	0	0	0	0	0	0	0	0	0	0	0	0
XLOC_001424	0.857793	0.663522	0.96743	1.4776	1.72442	1.7072	1.24603	1.41182	0.917963	0.616429	1.03871	2.16723
XLOC_001425	2.20794	2.53424	9.36987	8.06049	11.3636	5.06773	5.97752	4.97115	9.11154	11.1892	29.1814	25.6915
XLOC_001426	40.0611	33.3701	23.8755	30.229	19.4692	19.6702	21.0745	17.3872	30.1513	18.524	18.2789	19.1074
XLOC_001427	26.5438	29.0276	1.01399	0.561365	0.495531	0.717485	0.208149	0.527511	1.45893	0.993367	0.52661	0.805948
XLOC_001428	0.813126	0.989579	1.81587	2.23293	2.867	2.19089	1.85662	1.88208	1.00823	1.2692	3.68157	1.87815
XLOC_001429	22.5206	18.2794	1.5727	1.31309	1.04376	0.232699	0.911691	1.42694	12.0064	15.2676	0.786538	0.602311
XLOC_001430	60.1778	58.0856	47.0309	47.1183	66.0003	59.9423	53.6933	54.5862	70.4721	64.0889	64.8991	57.2652
XLOC_001431	16.4252	16.1573	10.0806	10.7305	14.1342	13.0362	16.5057	12.9509	17.9817	17.8312	12.7793	13.1591
XLOC_001432	0.156311	0	0.0683189	0.197813	0.0438087	0	0	0.0832912	0.232742	0.00132716	0	0.367385
XLOC_001433	4.53876	0	2.77244	0	1.04906	0	0	7.02709	0	0	0	0
XLOC_001434	166.99	155.338	129.452	131.488	155.618	158.587	170.581	160.894	218.786	192.426	141.895	131.13
XLOC_001435	2.36923	1.9984	0	0	0.187631	0.181115	0.105086	0.106528	0.638351	0.40121	0.265865	0
XLOC_001436	1020.72	939.224	6.79473	9.07136	4.47156	5.78155	2.34562	5.01805	17.335	16.1759	6.36049	5.16125
XLOC_001437	2740.19	2705.33	26.705	18.9897	9.07472	20.2073	11.1417	16.8233	32.7821	26.8518	12.7453	18.1303
XLOC_001438	5.82586	3.66437	1.65998	0.372871	1.86166	0	4.02657	1.42288	3.92626	0	0	0
XLOC_001439	17.984	17.8512	12.254	11.9814	16.1654	16.621	28.0158	21.9681	29.2744	27.444	16.1829	16.8401
XLOC_001440	4.0423	4.8677	6.19268	6.16026	4.88825	5.89114	6.29579	5.73949	5.58833	5.56773	5.68666	6.05297
XLOC_001441	17.2556	18.7725	4.42121	4.94732	3.73339	4.14566	3.23087	3.50834	6.74894	5.7425	4.24305	3.27948
XLOC_001442	10.3142	10.9041	4.64321	5.15361	4.08659	4.05632	6.31573	5.25322	7.74868	8.2231	3.03183	2.96796
XLOC_001443	68.4957	69.125	73.9388	78.2332	65.5635	68.7219	62.8827	63.6627	75.0271	78.392	59.3583	62.3876
XLOC_001444	1.61955	1.24453	1.60072	0.854767	1.77257	1.73289	2.24045	2.71077	2.06125	2.62369	0.95466	1.65853
XLOC_001445	4.78	4.5468	2.77566	2.82777	2.17801	2.10237	2.73436	2.20444	2.17145	2.33515	1.92451	1.77783
XLOC_001446	13.5379	13.4974	9.94865	10.8955	28.6477	19.6158	18.8	19.7949	16.0197	18.0446	34.4	34.0671
XLOC_001447	3.51717	4.19774	1.69168	1.7688	1.05683	1.36154	1.99153	1.56868	1.83309	2.29786	1.82964	1.63394
XLOC_001448	2.52141	2.87132	1.90683	4.41255	4.22278	3.23801	3.69476	4.35246	2.48223	2.60464	2.59958	4.21517
XLOC_001449	9.09947	10.5926	0.258132	0.176306	0.39011	0.303989	0.153369	0.189883	1.65962	1.38861	0.408443	0.320646
XLOC_001450	2.8275	3.10313	17.2158	24.112	46.7347	26.1205	33.4234	22.8352	39.1595	38.4443	19.4985	24.3743
XLOC_001451	0.473256	0.0788509	0.545374	0.377412	0.13326	0.257265	0.447811	0.624186	0.732372	0.908278	0.354046	0.433478
XLOC_001452	0.242028	0.483902	0.0597664	0.0579036	0.051113	0	0	0	0.0401295	0	0	0
XLOC_001453	0.738038	0.645578	0	0.176571	0	0.0752255	0.0654709	0.066369	0	0	0.165639	0
XLOC_001454	0.822626	0.875734	0	0	0.577398	0	0	0	0.58099	0.209232	0	0
XLOC_001455	0	0	0.197133	0.473652	0	0	0	0	0	0	0.367451	0
XLOC_001456	0	0	0	0	0	0	0	0	0	0	0	0
XLOC_001457	0.209059	0	0.51625	0.200064	9.53649	6.47782	50.5921	30.6062	8.80443	18.4093	1.87678	0.670205
XLOC_001458	0.472287	0.237023	0	0	0	0	0.17459	0	0.054617	0.111868	0	0.0751061
XLOC_001459	0	0	0	0	0	0	0	0	0	0	0	0
XLOC_001460	0	0	0	0	0	0	0	0	0	0	0	0
XLOC_001461	2.72376	1.86713	0	0.223421	0.0657397	0.0634568	0	0	0.154839	0.158142	0	0
XLOC_001462	27.3657	26.7941	0.25331	0.245415	0.866538	0.418223	0.399604	0.162034	0.672204	0.686542	0.230222	0.206301
XLOC_001463	59.0933	66.6792	1.00455	1.49537	1.49227	1.87265	2.68594	2.03038	41.1554	40.9189	1.21534	2.30145
XLOC_001464	1.87093	1.70031	1.31905	1.95438	2.15997	1.80296	4.65221	2.50778	3.38412	3.28846	0.739627	1.79157
XLOC_001465	1.10809	1.84623	2.18906	3.88819	1.87211	0.602366	2.62128	2.12579	6.12425	3.75293	1.32635	2.70654
XLOC_001466	0.710771	1.15618	1.72776	1.46552	0.116887	0.399919	0.44885	0.231011	0.374502	0.401176	0.165529	0.836413
XLOC_001467	4.55257	3.83243	23.0201	22.4485	19.982	18.8119	11.9444	13.2041	13.7706	11.4489	28.444	27.3792
XLOC_001468	2.31043	2.82297	0.988935	1.64599	1.93005	2.36541	1.73075	1.55134	1.02155	1.14768	4.88576	4.30302
XLOC_001469	104.743	105.003	90.0066	92.0896	150.726	122.703	129.584	132.755	126.397	129.65	98.7219	111.105
XLOC_001470	1.65404	2.4318	0.0351972	0	0.0301011	0.04298	0	0	0.0236328	0.0724107	0.024729	0
XLOC_001471	0	0.183321	0	0	0	0	0	0	0	0.0908095	0	0
XLOC_001472	4.4155	4.15746	10.1553	10.2865	2.34208	3.18179	3.17001	3.21349	4.01812	3.3387	2.91709	3.62112
XLOC_001473	0.431326	0.538986	0.426047	0.154788	0.546542	0.263781	0.726991	0.465451	0.357581	0.365209	0.58082	0.790145
XLOC_001474	61.2904	69.8038	89.9322	79.0743	59.0854	59.5469	60.2386	56.9712	41.6713	44.8889	63.749	66.6717
XLOC_001475	0.58362	0.428355	1.78113	1.45283	1.38037	2.09502	1.89585	1.72456	0.361134	0.526692	0.906019	0.810216
XLOC_001476	89.455	90.7495	31.5843	28.7821	48.9738	59.6024	57.9585	61.5551	11.8427	12.9423	26.674	26.1787
XLOC_001477	17.8896	17.8045	13.5083	13.5438	16.5899	15.3654	21.0469	18.5328	20.302	17.0728	16.5597	15.3664
XLOC_001478	0	0.363816	0	0	0.30743	0	0	0	0	0	0.326711	0.333342
XLOC_001479	0.442575	0	0	0	0	0	0	0.106131	0.0978419	0	0.132437	0
XLOC_001480	3.1241	1.91305	3.3748	5.8033	6.59321	5.16119	3.70527	3.92247	3.31456	2.83172	12.6375	11.0039
XLOC_001481	0	0	0	0	0	0	0.336126	0	0	0	0	0
XLOC_001482	0	0.301108	0.149392	0.433172	0.893086	0.491145	0.541014	0.646535	0.494367	0.511547	0.4065	0.548319
XLOC_001483	0.538171	1.01417	0	0	0.234954	0.37205	0.794854	1.69755	1.41642	0.858191	0	1.22364
XLOC_001484	0.57804	1.30018	0.0713707	0	0.183112	0	0.358943	0.103962	0.0479211	0.44049	0.129731	0.0661818
XLOC_001485	2.22447	0	0	0	0	0	0	0	0	0	0	1.01875
XLOC_001486	0	0.272549	0.269159	0	0	0.111077	0.29928	0	0	0.185259	0.244575	0
XLOC_001487	0	0.391138	0	1.12328	1.65259	0	0.833008	0	0.778481	0.265029	0.702494	1.79188
XLOC_001488	1.17843	0	0	0	0	0	0	0	0	0	0	0
XLOC_001489	0	0	0	0	0	0	0	0	0	0	0	0
XLOC_001490	0.691025	0.518104	0	0.165323	0	0	0	0.372848	0.572879	0	0	0
XLOC_001491	0.37043	0.367093	0	0.175989	0.466848	0.298952	0.260437	0.131878	0.121915	0.250044	0	0.168657
XLOC_001492	1.39777	0.00231613	0	0	0.594543	0	0	0.616431	0	0.391047	0.569794	0
XLOC_001493	0	0	0	0.014649	0	0	0	0	0	0	0	0
XLOC_001494	0.144299	0	0.142533	0	0	0	0	0	0.0957025	0	0	0
XLOC_001495	0.490046	0.489891	3.63036	3.28274	0.931421	0.599384	0.26083	0.264408	0.812524	0.0829855	1.75971	2.69314
XLOC_001496	0	2.12326	0	0	0	0	0	1.52798	0	1.43869	0	1.94541
XLOC_001497	0	0	0	0	0	0	0	0	0	0	0	0
XLOC_001498	0	0	0	0	0	0	0	0	0	0	0	1.0482
XLOC_001499	2.32936	1.80166	5.8569	5.17721	9.52561	5.02304	3.4393	2.93448	4.46666	4.92214	24.1874	12.158
XLOC_001500	0.445062	0.88221	0	0.246864	0.463715	0.538916	0.306803	0.623133	0.579884	0.51065	0.411845	0.59252
XLOC_001501	0	0	0	0	0	0	0	0	0	0	0	0
XLOC_001502	0	0	0	0	0	0	0	0	0	0	0	0
XLOC_001503	4.10884	4.22276	4.46654	2.92223	5.24178	5.06899	4.17126	2.67448	1.6877	3.67416	6.89435	7.51113
XLOC_001504	0	0	0	0	0	0	0.323734	0	0.90763	0.308997	0	0
XLOC_001505	0.13806	0.138017	0.136371	0	0	0	0	0	0	0.0935178	0	0
XLOC_001506	0.276044	0.0551912	0.327198	0.211334	0.233187	0.180071	0.274262	0.119153	0.439388	0.149587	0.247812	0.252842
XLOC_001507	3.1438	5.96326	0	0	0.0680952	0.0657305	0.171621	0.115984	0.374237	0.109206	0.289464	0.516843
XLOC_001508	0.443312	0.80705	0.602037	0.516369	1.60696	1.06142	0.443538	0.889239	0.621244	0.871524	1.14632	1.25555
XLOC_001509	0.276121	0	0	0	0	0	0	0	0	0.187036	0	0
XLOC_001510	0.47591	0.475759	0.658996	1.3663	2.01012	0.776125	0.675484	1.71187	1.08405	1.12533	0	0.871818
XLOC_001511	0	0	0	0	0	0	0	0	0	0	0	0
XLOC_001512	0	0	0	0	0	0	0	0	0	1.27416	0	0
XLOC_001513	0.460586	0.452235	1.04671	1.44543	0.509077	0.128314	0.32164	0.444864	0.300471	0.512327	0.136326	1.1019
XLOC_001514	2.05692	2.57033	5.33333	4.1829	1.95477	2.09655	2.91949	1.66474	2.55787	1.74162	2.3082	2.82605
XLOC_001515	16.6655	26.3387	0.899814	0	0	0	0	0	1.21368	1.90558	1.02627	1.0506
XLOC_001516	4.19955	3.23862	4.26667	4.47816	10.5413	8.41414	5.79033	5.52448	6.76414	8.20883	14.9725	13.7377
XLOC_001517	3365.76	3308.4	31.1755	40.5007	12.119	22.2264	8.14496	17.5455	51.3798	32.5544	19.9625	23.6528
XLOC_001518	0	0	0	0	0	0	0	0	0	0	0	0
XLOC_001519	3.75489	4.48355	13.078	14.3849	22.9789	30.7772	34.3416	36.4565	5.11762	6.41751	8.15948	10.5771
XLOC_001520	6.3005	5.19464	4.8119	4.72409	3.34703	4.60786	5.99248	5.32703	4.78173	4.79574	4.3733	4.99751
XLOC_001521	0	0.216538	0	0	0	0	0	0	0	0	0	0
XLOC_001522	0	0	0	0	0	0	0	0	0	0	0	0
XLOC_001523	0	0	0	0	0	0	0	0	0	0	0	0
XLOC_001524	0.439952	0.439813	0	0	0	0	0	0	0	0	0	0
XLOC_001525	75.7283	103.118	387.111	439.657	320.892	321.595	126.472	151.704	85.8355	81.8018	435.154	459.438
XLOC_001526	12.7692	12.0027	3.47437	2.9445	2.21145	2.99464	5.83369	4.73062	7.90671	8.83825	1.3695	1.93518
XLOC_001527	18.4497	17.5222	14.0293	15.4136	13.8222	16.2784	27.8178	26.7541	33.6969	30.5002	10.9957	12.1825
XLOC_001528	9.4495	9.56171	0.189712	0.11028	0.150664	0.0939662	0.0817815	0	0.942616	0.728547	0.0276581	0.035184
XLOC_001529	11.8544	10.4977	25.6315	27.1551	41.633	36.1914	22.655	24.4431	21.4506	20.0746	55.8918	57.7529
XLOC_001530	0.505047	0.317399	0.52269	0.303839	0.19691	0.316424	0.0827123	0.279171	0.374352	0.143376	0.453396	0.613939
XLOC_001531	35.3875	33.225	0.826624	0.457635	0.403966	0.877359	0.933277	0.516043	4.6781	2.9963	0.643953	0.438015
XLOC_001532	117.683	124.25	68.838	67.1959	102.938	112.575	100.11	104.317	118.906	138.165	78.6847	85.2102
XLOC_001533	15.9789	11.8251	9.90496	12.4507	7.21922	9.44895	14.5015	11.7222	17.3232	17.3092	5.02158	6.23135
XLOC_001534	7.98235	9.75617	22.5076	23.3778	36.1705	39.4372	28.717	30.4623	24.0276	24.0818	40.4602	39.864
XLOC_001535	201.595	197.911	215.821	202.164	213.126	219.506	176.478	175.425	245.788	224.865	346.784	290.798
XLOC_001536	58.9763	61.3124	50.6801	50.3719	69.8629	62.6987	55.0397	54.617	67.3255	66.1792	81.0075	82.1092
XLOC_001537	15.8454	13.9726	12.5368	13.6616	12.3579	13.9479	14.9565	14.8646	17.8817	17.7529	14.1003	14.3661
XLOC_001538	58.0498	59.1976	64.9149	66.1996	208.085	167.071	127.469	148.785	51.6103	67.8718	138.128	90.5108
XLOC_001539	0	0	0	0	0	0	0	0	0	0	0	0
XLOC_001540	61.8041	55.7601	138.246	127.231	51.6563	49.7482	55.2985	55.2169	34.6384	35.5355	73.5583	71.7137
XLOC_001541	2.39853	2.68494	17.0168	15.7018	3.9708	6.86788	6.68052	7.79227	6.41023	5.84284	6.30197	6.74652
XLOC_001542	12.9565	14.3751	19.0029	17.8471	10.5718	13.086	12.1902	12.9929	14.0613	12.699	12.865	15.9581
XLOC_001543	1.94574	0.972559	3.6036	3.49129	6.06098	7.33791	3.79731	6.12405	1.77438	1.81222	6.8778	7.90848
XLOC_001544	39.2443	33.8448	52.1289	50.3921	10.9845	16.191	18.8304	17.1925	12.3145	11.5854	14.881	14.5929
XLOC_001545	10.3224	12.2919	19.5248	18.1715	4.20734	5.5842	7.06921	6.38239	4.3355	2.53425	6.98628	3.01465
XLOC_001546	6.05985	6.4081	9.93002	9.75461	7.04239	8.36875	8.4022	8.24026	7.31789	6.71472	6.5407	8.50223
XLOC_001547	17.1888	16.1094	16.6753	15.054	18.0206	16.4563	20.2038	23.2438	26.7188	24.9497	16.0509	16.3767
XLOC_001548	1035.45	1105.78	1090.04	1082.8	1099.39	949.641	633.195	644.116	724.57	617.102	1328.8	1221.9
XLOC_001549	13.095	19.4883	14.6521	14.691	103.12	60.5547	114.591	147.884	23.1597	33.5677	17.0504	13.1802
XLOC_001550	11.7903	13.751	2.43207	1.88498	69.3037	40.6589	81.7553	119.809	8.1454	17.803	5.29224	4.72469
XLOC_001551	8.67059	7.2232	3.56853	6.22316	9.15558	7.0701	5.64054	4.67829	5.27132	4.89433	5.18923	7.94182
XLOC_001552	0.271762	0.135838	0.536872	0.455122	0.0573925	0.221598	0.0964315	0.244386	0.135179	0.047736	0.182976	0.31115
XLOC_001553	39.2222	36.0978	31.9776	29.7894	73.1026	69.041	60.972	59.121	28.4905	45.9667	49.1834	40.4875
XLOC_001554	56.7287	67.347	66.9368	55.7153	106.133	105.933	124.446	123.256	52.8909	98.642	82.2151	104.331
XLOC_001555	11.4784	11.386	7.38872	7.79246	6.03197	6.12429	7.97608	11.3913	12.8988	9.67808	4.56321	5.76365
XLOC_001556	11.1445	12.4214	14.2798	16.1918	14.7377	13.8024	11.2489	11.7844	10.0113	9.19342	38.5808	33.7082
XLOC_001557	0.051122	0.103199	0	0.076293	0.0214682	0.0219798	0	0.019185	0.0170215	0.0518729	0.0689187	0.0244614
XLOC_001558	18.8208	18.9176	29.1276	32.0086	36.7375	31.4649	35.2902	39.3581	38.0526	38.8447	34.0359	40.6401
XLOC_001559	2.16941	2.04998	8.12644	5.56504	5.13894	2.73617	4.68488	4.65149	5.12509	5.05102	5.93596	6.46541
XLOC_001560	9.38337	10.8211	0.271504	0.336561	0.422175	0.0329473	0.249588	0	0.605779	0.220307	0	0.107378
XLOC_001561	0.262311	0	0	0	0.127203	0	1.27873	0	0	0	0.235484	0
XLOC_001562	8.10606	8.01215	9.34056	9.3886	8.33792	10.4962	9.98258	10.3829	12.1482	11.668	8.7694	8.87908
XLOC_001563	15.1688	15.7914	14.544	13.9405	10.0301	13.0725	11.9713	13.8665	16.5648	17.7507	10.9644	12.8158
XLOC_001564	10.0544	10.4393	9.94952	9.90677	7.08251	7.39157	10.6882	9.07014	8.26391	9.02653	7.74436	8.08463
XLOC_001565	3638.24	3960.17	2880.23	2831.09	2602.58	2569.29	2136.04	2208.79	2084.14	1988.55	2583.77	2715.07
XLOC_001566	5.29165	4.96431	1.15558	1.11236	0.660481	1.27579	0.484126	0.967506	1.4999	1.38299	1.18605	1.21476
XLOC_001567	28.676	15.9335	2.67084	3.8132	7.51366	3.82935	3.1813	7.0643	6.46514	7.80831	7.09043	3.58465
XLOC_001568	59.8501	58.648	59.1176	56.2234	71.1956	71.1357	78.5892	80.3362	83.2002	82.3409	55.6263	64.4982
XLOC_001569	11.348	11.9261	29.1436	28.0126	17.1568	20.4047	19.1216	19.4258	14.049	17.5416	22.6735	25.5323
XLOC_001570	0	0	0	0	0	0	0	0	0	0	0	0
XLOC_001571	24.5856	23.6766	23.3934	23.1032	24.3927	26.327	23.4736	23.7198	24.4675	22.9032	17.0749	15.8386
XLOC_001572	0.230744	0.461342	0.455841	0.220817	0.779682	0.564455	0.163754	0	0.153035	0	0.621437	0.21135
XLOC_001573	3.35363	3.62454	2.59974	1.90737	8.93239	4.27803	3.04133	3.12994	3.82473	3.25819	6.71052	6.35468
XLOC_001574	80.6088	82.087	36.0808	38.2041	34.2051	41.8729	77.6161	68.222	87.3143	85.1977	29.8281	33.5731
XLOC_001575	0.993884	1.41029	0.790425	0.465463	1.03074	0.607895	0.984559	0.60251	0.717418	0.892206	1.68255	1.17608
XLOC_001576	9.05321	9.62261	9.4147	6.85899	12.2303	13.9465	9.91643	9.3933	10.5805	9.37834	10.0439	6.49837
XLOC_001577	0	0	0	0	0	0	0	0	0	0	0	0
XLOC_001578	0	0	0	0	0	0	0	0	0	0	0	0
XLOC_001579	0	0	0	0	0	0	0	0	0	0	0	0.937705
XLOC_001580	0	0	0	0	0.685417	0	0.575822	0	0	0	0	0
XLOC_001581	0	0.294518	0	0	0.497744	0.480458	1.67263	0.847785	0.195393	0	0.528961	0.539697
XLOC_001582	9.0624	6.62042	10.6729	7.00471	14.1331	14.495	12.8627	11.7854	5.77922	10.1523	10.6388	17.8784
XLOC_001583	0.116733	0.233391	0	0	0	0	0	0.0839788	0	0	0	0.106921
XLOC_001584	0	0.399024	0.394265	0.381977	0.337181	0.325472	0.566535	1.43577	1.32363	0.270372	0	0.365601
XLOC_001585	4.77359	3.01395	1.73717	2.88519	2.65295	4.30218	7.93436	7.68171	6.74848	6.46697	2.81934	1.72593
XLOC_001586	0	0	0	0	0.844655	0	0	0	0.66315	0	0	0
XLOC_001587	0	1.70733	0	0	0	1.21617	0	0	1.22587	0	1.50876	0
XLOC_001588	0	0	0	0	0	0	0	0	0	0	0	0
XLOC_001589	0.39113	0.340683	0.0962151	0.37674	0.206745	0.0396207	0.138765	0.212543	0.225276	0.427294	0.223871	0.177783
XLOC_001590	0.808076	0.605865	0.399093	0	0.68262	0.658914	0.430104	0.726673	1.33984	0.684207	0.181358	0.370078
XLOC_001591	0	0	0	0	0	0	0	0	0	0	0	0
XLOC_001592	7.66644	8.67091	8.32041	7.91009	6.69361	4.94513	6.52673	7.1796	6.60419	6.9555	6.89782	5.73573
XLOC_001593	1.74916	3.39849	2.42983	0.850186	1.31707	1.79195	2.909	3.19512	2.16215	1.19746	3.7102	2.08933
XLOC_001594	2.62053	2.22566	3.74978	3.75051	2.61873	2.61961	3.13265	3.67152	2.83615	3.55925	3.20114	3.29637
XLOC_001595	0.48759	0.204819	0.311977	0.114022	0.164124	0	0.371621	0.109329	0	0.131604	0.0872086	0
XLOC_001596	0	0	0	0	0	0	0	0	0	0	0	0
XLOC_001597	0	0	0	0	0	0	0	0	0	0	0	0
XLOC_001598	2.6061	2.44351	2.86055	2.49783	1.19115	1.31866	1.74039	2.0396	1.97743	1.7322	1.13004	1.25485
XLOC_001599	0.174893	0	0	0	0.148275	0	0	0	0.116295	0	0	0
XLOC_001600	1.64982	0.659719	0.325926	0.315768	0.557473	0.269057	0.234168	0.23738	0	0	0.592437	0
XLOC_001601	0.545396	0.272611	0	0	0	0.222361	0.580581	0.784727	0.542578	0.184717	0.244809	0.499554
XLOC_001602	0	0.283207	0	0.194918	0.174191	0.502273	0.289096	0.305426	0.136628	0.139586	0.186268	0.189319
XLOC_001603	0	0.463981	0.349831	0.169464	0	0	0	0	0.352336	0.359851	0	0
XLOC_001604	1.2504	4.5662	7.29209	6.75488	21.2041	13.6879	10.7544	10.9223	1.85723	4.46346	17.1009	14.4887
XLOC_001605	1.86772	1.86713	6.14955	5.3621	10.5184	9.13777	8.83652	8.95773	2.47743	5.90398	16.7671	8.55369
XLOC_001606	1.67615	1.16319	2.64529	2.52803	7.89925	11.9966	9.63295	7.77273	3.40162	3.6546	13.645	4.61661
XLOC_001607	0.634547	0	0	0	0	0	0	0	0	0	0	0
XLOC_001608	0.395167	0.197521	0	0	0	0	0	0	0	0	0	0
XLOC_001609	0.567599	0.113484	0.224261	0.108636	0.191791	0.618995	0.107746	0.163335	0.301156	0.0768948	0.40764	0.311935
XLOC_001610	0.425215	0.601859	0.51409	0	0.391851	0.43535	0.0658391	0.384095	0.269991	0.251368	0.166571	0.120427
XLOC_001611	1.05589	0.263888	1.82519	0.757843	1.89541	1.07623	1.31134	1.13942	0.700287	0.804628	0.829412	0.483569
XLOC_001612	0	0.0782276	0	0	0.0661035	0	0.166602	0.0562956	0	0.106012	0	0.215026
XLOC_001613	0	0.868052	0.8577	0.830968	3.66758	2.12413	4.92985	4.37279	2.30358	1.76453	0.779522	2.38603
XLOC_001614	354.795	320.726	1.4965	0	0	0	0.372689	0	2.74628	1.26549	0.262841	0
XLOC_001615	11.0269	11.8042	119.984	130.608	176.351	131.05	76.563	88.4399	80.5593	68.0888	297.501	305.99
XLOC_001616	6.3585	7.64398	5.15307	4.83297	11.5609	7.80904	2.84932	2.97082	2.97526	3.02212	12.7545	7.27172
XLOC_001617	0.487032	0.243439	0.120268	0	0	0.0992829	0.172817	0.0875941	0	0	0.109306	0
XLOC_001618	30.2701	30.4895	0.172456	0.49705	0.185233	0.145926	0.0924191	0.12497	0.647844	0.384605	0.155845	0.160537
XLOC_001619	0.450634	0.525573	0.222559	0.215623	0.444117	0.183726	1.91882	1.1887	0.8468	1.32273	0.269698	0.137586
XLOC_001620	0.329415	0.248022	0.0813459	0	0.0695682	0.201457	0	0.0595108	0.109697	0.223136	0.221794	0
XLOC_001621	16.9378	18.0036	56.2975	47.9173	62.7331	66.9729	47.7012	54.1962	40.4516	48.8795	53.0159	52.6198
XLOC_001622	20.657	18.5275	78.8039	76.2554	80.1146	66.4312	49.8363	56.6656	54.0004	54.6945	59.3592	57.2926
XLOC_001623	1.37436	2.07492	0.827957	1.31523	1.04526	1.29308	2.49275	2.45915	2.59429	2.31544	0.695992	0.365601
XLOC_001624	0	0.532032	1.05137	0	2.69745	0.433962	0.37769	1.14861	1.76484	1.80248	0	1.4624
XLOC_001625	0	0.435986	0.454428	0.0768521	0.388633	0.312614	0.217972	0.441295	0.254655	0.467444	0.0688346	0
XLOC_001626	14.7939	17.5834	14.8822	15.136	16.298	14.3423	15.7241	14.3703	15.0565	15.1006	10.0984	11.9893
XLOC_001627	4.57098	2.66993	0.514422	0.377663	0.992765	0.476567	0.971943	1.02693	1.46898	0.89106	0.116051	0.296947
XLOC_001628	1147.36	1235.47	1.69557	1.20466	0.386686	1.58635	1.62428	0.823283	1.89745	1.78289	3.08204	0.390394
XLOC_001629	443.081	445.419	1.01081	4.4899	1.56009	1.43143	0.744476	1.15869	2.0361	0.710586	3.63529	1.89466
XLOC_001630	18.2469	17.6939	18.2939	19.8192	18.2656	22.2437	21.3665	17.2446	21.2385	19.405	20.4759	18.3845
XLOC_001631	32.4645	36.5497	31.4189	28.7036	21.6437	24.6845	35.4165	26.8903	24.4287	31.6353	28.294	32.1535
XLOC_001632	5.53013	4.23842	7.64743	8.82033	4.36012	5.56151	4.84034	3.18275	5.99059	5.86864	3.97164	3.03919
XLOC_001633	7.20985	7.20756	10.9711	13.6128	8.23041	9.21572	8.43557	9.25221	9.305	9.89945	9.2714	9.10261
XLOC_001634	0	0	0	0	0	0	0	0	0	0	0	0
XLOC_001635	165.449	145.483	1485.81	1647.54	1265.45	1201.08	474.477	476.828	428.61	331.554	2927.72	2741.32
XLOC_001636	0	0	0	0	0	0	0.400287	0	0	0	0	0
XLOC_001637	0	0	0	0	0	0	0	0	0.0885991	0	0	0
XLOC_001638	10.4189	13.5836	0.920988	1.11027	0.9535	1.22323	1.15386	0.94353	5.17807	3.93577	1.26221	1.10571
XLOC_001639	6.76461	7.94065	9.4062	9.89533	11.2763	7.76288	8.63565	9.74475	10.404	11.1863	20.2117	20.9283
XLOC_001640	55.3149	52.561	79.1492	87.4478	57.0177	58.9864	54.9664	50.9599	66.9885	68.5396	69.8017	78.354
XLOC_001641	4.81471	4.00713	3.80359	2.43323	1.37081	2.06211	5.23032	3.96957	6.91139	8.24855	1.10271	1.74495
XLOC_001642	5.22614	6.7611	2.73292	2.05936	2.85662	5.01348	8.07224	6.856	12.8449	12.7025	1.93186	1.97107
XLOC_001643	37.2295	43.5865	16.5634	16.8264	28.6531	23.1196	31.0012	29.5738	31.808	32.5307	20.0693	16.1131
XLOC_001644	0	0	0.174603	0	0	0	0	0	0	0	0	0
XLOC_001645	51.2682	51.5319	51.8913	51.6649	59.1769	62.6669	54.8963	55.382	61.6827	58.3718	59.6196	61.5853
XLOC_001646	23.5394	22.9134	63.0621	60.9782	53.8101	52.8616	48.973	52.8443	41.512	45.2631	58.6872	62.9851
XLOC_001647	1.69145	2.02326	2.56047	2.87002	1.35419	2.19205	3.37766	3.30465	3.89931	3.33993	1.23877	1.59182
XLOC_001648	0.195438	0.096733	0	0.0926005	0.0817409	0	0	0	0	0	0	0
XLOC_001649	27.1581	24.8339	23.6248	26.9768	27.3324	28.0969	28.142	28.1093	29.4374	26.899	23.7483	27.1059
XLOC_001650	2.64901	3.20568	1.3273	1.7345	0.824432	2.27372	1.87994	1.10332	3.32883	2.26656	2.41264	2.04325
XLOC_001651	0	0.0979239	0	0	0.0824433	0	0.0692121	0.0701616	0.194484	0.198453	0.0875522	0.0893292
XLOC_001652	0	0.272611	0	0.260965	0.11518	0	0.0967635	0	0.0904297	0.0803984	0	0
XLOC_001653	0	0	0	0.751828	1.32732	0	0	0	0	0	0	0
XLOC_001654	0	0.168582	0	0.161381	0.284909	0.137508	0	0.242637	0.111843	0.342686	0	0
XLOC_001655	0.143463	0.162359	0.141707	0.155423	0.137196	0.198647	0.115259	0.11684	0.107714	0.110012	0.128791	0.14876
XLOC_001656	0	0	0	0	0	0	0	0	0	0	0	0
XLOC_001657	0.198067	0.201658	0.0217381	0.147424	0.0371814	0.0538353	0.0780906	0	0	0.0447214	0	0.0201576
XLOC_001658	0.99443	0.467331	0.470242	0	0.50352	0.368734	0.490684	0.31548	0.286741	0.239093	0.315132	0.41701
XLOC_001659	0	0	0	0	0	0	0	0	0	0	0	0
XLOC_001660	1.05227	0.524976	0.259358	0.708416	0	0	0	0.250965	0.662099	0	0.29632	0.396229
XLOC_001661	1.77914	1.12642	2.42022	1.51104	1.45432	3.11479	2.22212	2.61368	1.61427	0.592816	1.24737	1.69046
XLOC_001662	0.831287	1.208	1.68492	1.81427	1.78611	1.83155	0.516538	1.57582	1.18449	0.759324	3.66157	1.84986
XLOC_001663	0	0	4.35157	4.21595	3.72153	0	0	1.76161	0	5.96829	3.95494	8.07041
XLOC_001664	0	0	0	0	0.455199	0.847015	0.96891	0.704911	0.537297	0.923165	0.24142	0.627651
XLOC_001665	0	0	0	0	0	0	0	0	0	0	0	0
XLOC_001666	0	0	0	0	0	0	0	0	0	0	0	0
XLOC_001667	3.29667	3.02841	5.45359	4.60436	1.58059	2.68815	1.89695	2.37166	2.00915	2.23306	1.75971	2.69314
XLOC_001668	0.399428	0.414312	1.03914	0.568236	1.5076	0.767163	0.820216	0.826225	0.847414	0.895421	1.78469	1.76061
XLOC_001669	0.556801	0.99543	4.71405	5.28522	2.26636	2.33481	0.838463	1.29817	1.44629	1.60001	3.51657	5.29352
XLOC_001670	2.67539	0	1.61677	2.78548	1.80612	0.579695	3.19558	0.962351	0.558692	1.71005	0.812478	1.22526
XLOC_001671	0	0	0	0	0	0	0	0	0	0	0	0
XLOC_001672	0	0.653441	1.28969	0	0.857262	2.34396	0.868697	1.73842	0.418767	1.34019	1.26709	1.50576
XLOC_001673	0.758098	0.447764	3.04024	3.07571	2.13409	2.19039	1.71591	1.73625	0.749316	0.845933	2.20736	1.44327
XLOC_001674	1.58676	1.09818	1.08508	0.700841	1.13419	0.995278	1.90568	2.01963	2.83331	1.40554	0.21915	0.335397
XLOC_001675	4.08453	3.63055	3.01128	2.86292	2.61758	3.44966	2.68976	3.51272	4.19433	3.3817	2.37723	2.57805
XLOC_001676	2.34034	3.39489	6.97369	1.82288	1.65488	3.67488	1.38394	4.66364	0.494275	1.36682	3.94068	5.32793
XLOC_001677	0.363931	0.363816	0	0	0.61486	1.18701	1.54964	0	0.482735	0.493032	0	0.333342
XLOC_001678	0	0	0	0	0	0	0	0	0	3.05591	0	0
XLOC_001679	0	0.894123	1.02385	0	0.327159	0	0.232911	0.658899	0.398519	0.796073	0	0.237354
XLOC_001680	0	0	0	0	0	0	0	0	0	0	0	0
XLOC_001681	3.28566	3.07496	1.38104	0.8697	0.177163	0.513032	0.347283	0.251462	0.74183	0.331473	0.376549	0.384191
XLOC_001682	0	0.247395	0.733334	0.947304	1.25431	1.21076	1.40501	1.95838	3.2826	3.52025	0.666491	1.13336
XLOC_001683	1.08779	1.04861	2.07221	2.71402	1.64091	3.1045	3.41878	3.07439	5.28204	5.34208	3.83642	5.37325
XLOC_001684	0	0	0	0	1.08591	0	0	0	0	0	0	1.17744
XLOC_001685	1.61396	1.61344	0.797102	2.57419	3.40846	1.53538	1.90898	2.12868	2.49763	2.5509	2.41482	2.71022
XLOC_001686	17.2991	19.2151	21.8339	19.314	12.9897	3.9183	8.86654	10.371	12.1105	12.3689	18.1182	17.6056
XLOC_001687	12.7861	14.2498	30.3258	26.6985	5.36236	6.0098	7.21968	7.77279	4.84899	5.42632	13.0668	12.9852
XLOC_001688	0	0	0	0	0	0	0	0	0	0	0	0
XLOC_001689	1.04663	0.36992	0.406362	0	0.905686	0.761516	0	1.02393	0	0.57474	0.677147	0.498182
XLOC_001690	0	0	0.493827	0.967649	0	0.407662	0	0	0	0	1.81815	1.40836
XLOC_001691	4.30175	3.85845	16.9964	0	10.9017	3.50769	4.91557	3.09472	0	0	0	7.88036
XLOC_001692	0	0	0	0.0953661	0	0	0	0	0	0	0	0
XLOC_001693	1.27129	0	2.52157	1.2166	0	0	1.88633	0	1.38816	2.03721	1.42185	2.06732
XLOC_001694	0.548827	0.978388	0.305	1.52912	1.68802	0.948645	1.76837	1.58939	1.23753	1.34429	1.37692	1.38186
XLOC_001695	1.17843	1.17805	0	1.12772	0.995472	0	0	0	0.781558	0.798229	0	0
XLOC_001696	0.359743	0.119876	0.35534	0	0.101297	0.0488898	0.12765	0.258803	0.516944	0.121839	0.269126	0.219671
XLOC_001697	0	0	0	0	0	0	0	0	0	0	0	0.136682
XLOC_001698	0	0	0	0	0	0.667083	0	0.483716	0	0	0	0
XLOC_001699	0	1.84274	0.754463	3.32684	4.21054	4.38268	0.731773	1.48202	1.22578	1.70037	0.989531	3.55388
XLOC_001700	2.44411	0	8.44968	2.33895	6.19396	7.97181	1.73452	1.75832	4.05247	1.65556	2.19414	4.47735
XLOC_001701	0.185721	0	0	0	0	0	0.131802	0	0	0	0	0
XLOC_001702	15.293	7.63522	5.68822	5.78797	15.1294	21.049	20.3318	23.5718	30.034	33.9368	20.1354	21.9685
XLOC_001703	4.90696	0	2.92388	1.53009	2.80823	5.05666	3.02422	1.22551	1.94964	1.84606	5.93822	1.94266
XLOC_001704	6.7778	6.10645	6.52954	7.28695	8.90637	7.983	10.9265	9.21026	10.4888	10.3157	10.0659	8.81399
XLOC_001705	27.5992	29.4941	58.9349	61.9658	79.5594	66.0871	57.2968	63.693	54.7565	56.0687	95.4414	89.0726
XLOC_001706	0	0	0	0	0	0	0	0	0	0	0	0
XLOC_001707	17.8228	19.5213	21.9012	21.6128	15.9482	14.2569	14.6367	15.1215	17.1597	17.7808	18.6895	19.4074
XLOC_001708	0	0.0456027	0.0450589	0.0436545	0.038535	0	0.0323734	0.0328175	0.0605087	0	0	0
XLOC_001709	0.168148	0.134008	0.331652	0.353118	0.548894	0.229024	0.322443	0.241381	1.06533	1.00204	0.663163	0.523186
XLOC_001710	0.0751627	0.0375694	0	0.140134	0	0	0	0	0	0	0	0
XLOC_001711	1.94991	2.19814	0.983515	1.66751	0.455604	0.541271	1.17771	1.13417	1.29323	1.82666	1.19183	1.52002
XLOC_001712	0	0	0.195947	0	0.218331	0	0.672895	0.185937	0.284413	0.115408	0	0.181702
XLOC_001713	1.67778	2.34815	0	0	0	0	0	0.362105	0.222549	0.113648	0	0
XLOC_001714	3.88076	5.07323	0.0589733	0.0571353	0.0504348	0.0973667	0.0423705	0.0429517	0.316776	0.24265	0	0
XLOC_001715	11.0503	11.2319	13.5675	14.2967	13.663	14.447	13.406	12.4575	10.727	11.2067	15.6007	15.1539
XLOC_001716	8.67231	8.43524	8.69	9.75165	6.84366	5.86111	8.62408	8.78791	10.2429	8.94383	5.62512	6.15434
XLOC_001717	1.7478	1.82667	1.02015	0.608221	1.00667	1.3604	1.24037	0.971619	1.15918	1.45298	1.14113	0.727681
XLOC_001718	0.175279	0.261725	0.07458	0.0861756	0	0.0330137	0.111026	0.126465	0.120261	0.0583219	0	0
XLOC_001719	8.11031	7.12497	1.3037	2.14824	0.611711	1.0038	1.31134	1.25445	1.31304	1.34105	1.30015	1.26021
XLOC_001720	2.8122	2.8113	0	0	0	0	0	0	0	0	0	0
XLOC_001721	6.8494	6.77841	0.0339978	0.0329382	0	0.0280657	0.0488528	0.0247615	1.25551	1.32892	0	0.0630522
XLOC_001722	1.03114	2.31933	1.27315	0.986775	0.435526	0.840802	1.09766	2.03998	1.53872	1.04769	0.694262	0.236117
XLOC_001723	0.458284	1.83255	0.452675	0	0	0.37369	0.650466	0.659389	0	0	0	0
XLOC_001724	1.97979	1.43939	1.6	1.72237	1.06427	0.293516	1.40501	1.16532	1.0743	2.07253	0.807868	0.824265
XLOC_001725	1.89151	2.75042	0.962491	1.37131	0.677877	0.981504	1.50507	1.40201	1.59663	1.55304	0.360196	0.682512
XLOC_001726	0	0	0	0	0	0	0	0	0	0	0	0
XLOC_001727	0.565273	0.299167	0.229957	0.0954622	0.0562175	0.135635	0.141613	0.167557	0.154397	0.202779	0.0602819	0.0304698
XLOC_001728	169.665	171.805	158.049	151.443	112.174	124.923	148.756	153.323	162.892	154.622	96.7472	109.768
XLOC_001729	24.6485	25.1677	32.1586	33.2376	11.6913	15.692	11.3186	11.3791	14.7302	13.6605	10.8272	16.3591
XLOC_001730	0	0	0.00246033	0	0.629634	0.00111514	2.45454	1.95883	1.13941	2.5288	1.85895	1.82135
XLOC_001731	8.69584	8.69762	31.6043	27.6354	8.8167	14.3535	7.80023	8.06044	8.69598	6.48826	7.01948	11.4081
XLOC_001732	0	0	0	0	0	0	0	0	0	0	0	0
XLOC_001733	0	0	0	0	0	0	0	0	0	0	0	0
XLOC_001734	8.59368	6.3642	3.1812	2.77209	2.1095	1.54943	3.96971	2.00797	2.62141	2.84176	0.629802	1.37238
XLOC_001735	18.8684	18.5604	19.2572	19.502	17.1757	24.1014	23.3673	22.7015	27.1238	26.4432	23.7392	23.4548
XLOC_001736	9.09715	11.8071	16.9969	15.5508	10.3159	12.6482	11.3363	11.5584	11.2079	9.01473	10.3261	11.0724
XLOC_001737	19.8204	17.31	17.5444	15.3519	9.73239	15.1049	11.8494	8.84173	12.5558	11.004	7.68183	6.78299
XLOC_001738	24.4304	24.387	17.9363	18.0262	19.8588	22.4724	25.2715	26.0011	35.6714	33.7492	14.7226	12.9061
XLOC_001739	0.209195	0.266446	0.364595	0.832889	0	0.282481	0.15132	0.0383489	0.400456	0.141702	0.402106	0.410267
XLOC_001740	0.43065	0	0.678943	0.439675	0.675422	0.510218	0.44777	0.443906	0.422296	0.456497	0	1.30694
XLOC_001741	4.11655	5.77654	8.20788	9.33637	2.72104	2.91083	3.23947	3.14108	4.08621	3.03576	3.49109	3.33729
XLOC_001742	6.69094	7.8846	6.98134	6.91886	6.84631	9.50251	10.2158	9.10806	8.53477	9.22435	6.59214	6.83894
XLOC_001743	0.520996	4.16665	0	0.498581	0.88022	2.97378	0.739477	2.99848	0.345536	1.76453	0.467713	0.954412
XLOC_001744	15.3294	15.9036	24.092	26.0137	44.493	50.1339	34.6921	38.0622	26.1339	27.3814	29.5179	21.1698
XLOC_001745	10.7163	11.4392	14.902	12.6309	11.2529	16.1434	11.1713	10.8454	10.6294	13.2306	13.5414	16.9521
XLOC_001746	40.3888	37.6726	0.270297	0.315784	0.249119	0.145487	0.0982598	0.200923	3.38833	3.29456	0.176496	0.360155
XLOC_001747	0	0.092388	0.597971	0	0	0	0.282671	0.557038	2.09192	0.506424	0	0
XLOC_001748	14.9033	7.44927	0	0	0	0	0	0	2.47104	2.52375	0	0
XLOC_001749	241.962	241.543	1997.62	2095.87	841.527	1350.89	549.467	655.072	306.908	308.664	1016.1	1157.04
XLOC_001750	121.996	138.853	165.829	154.266	109.492	145.506	118.691	108.726	70.5906	66.2201	167.338	195.577
XLOC_001751	2.67081	2.48186	2.26226	1.90067	3.71215	4.16997	3.01723	2.58897	2.85252	3.08798	3.84272	2.7623
XLOC_001752	7.64145	9.46141	7.84393	6.97812	19.6184	18.8761	12.9017	13.7793	10.5169	9.96312	25.5118	21.0204
XLOC_001753	0	0.352163	0	0	0	0	0	0	0.233637	0.23862	0	0
XLOC_001754	1.36942	0.195569	0	0	0	0	0	0.281478	0.648734	0.265029	0	0
XLOC_001755	69.0537	69.8274	1.81406	0.468672	0.465423	0.698849	0.521338	0.220205	1.96804	1.44309	0.329742	1.11507
XLOC_001756	39.141	44.2884	0.182082	0.352813	0.467156	0.400829	0.348853	0.486253	1.18182	0.707566	0.33097	0.562813
XLOC_001757	42.5291	51.8401	43.2273	51.1899	19.9322	21.5471	9.66412	14.6207	10.468	8.13527	29.8342	36.7107
XLOC_001758	27.4266	30.8724	0.308123	0.29852	0.105025	0.395672	0.172182	0.349088	1.19534	0.798242	0.267869	0.444456
XLOC_001759	0.924348	1.26008	0.0415016	0.0804163	0.106478	0.171301	0.0596352	0.0302266	0.139329	0.142301	0.150875	0.115453
XLOC_001760	0.30902	0.514869	0	0.0985748	0	0	0.0731013	0	0.0683163	0.0697735	0	0
XLOC_001761	0.430674	0	0.279249	0.418013	0.243009	0	0.0757749	0.0781249	0.0634652	0.215397	0.0802287	0.0794127
XLOC_001762	62.6612	51.6087	299.423	314.382	100.917	158.556	116.52	137.907	117.428	126.172	93.2942	132.386
XLOC_001763	20.5598	17.3472	110.787	103.829	109.499	77.2035	71.3181	83.7491	50.0806	54.8433	98.7283	95.979
XLOC_001764	553.136	563.583	635.068	622.907	504.99	464.5	431.181	417.908	335.076	363.658	530.979	575.417
XLOC_001765	0	0	0	0	0	0	0	0	0	0	0	0
XLOC_001766	8.05974	9.36513	3.99181	3.93682	8.62707	6.71403	11.384	9.81143	7.85087	8.74759	5.07059	4.26748
XLOC_001767	0	0	0	0.273617	0	0	0	0.216509	0	0	0	0
XLOC_001768	16.7939	15.7414	13.284	14.9719	14.2294	18.0611	20.5511	20.5899	25.705	24.1933	15.0308	16.6358
XLOC_001769	3.99646	2.33565	0.303657	0.294193	1.09071	1.20323	1.32715	1.45967	0.937882	1.03476	0.783449	0.506846
XLOC_001770	4.06728	5.19484	3.92711	3.68196	4.45492	2.63235	3.59372	3.80369	3.96914	2.89377	3.35753	4.12734
XLOC_001771	11.2243	13.9967	16.3396	17.1897	89.6044	45.2604	28.3525	30.3796	12.0405	12.7299	99.2878	72.0942
XLOC_001772	68.3562	75.9675	96.7002	95.2522	105.812	93.9845	84.9583	88.0202	95.2525	92.9127	131.625	121.891
XLOC_001773	19.9755	20.3745	15.4624	18.1289	18.2707	19.2183	23.3736	22.9665	25.0556	27.0545	20.0373	23.184
XLOC_001774	21.3158	25.063	21.5476	20.9276	21.7786	23.6279	21.4895	20.1266	20.5952	18.8845	21.3024	18.4548
XLOC_001775	0.565653	1.30424	0.660852	0.671661	0	0	0	0.894533	0	0	1.10076	0
XLOC_001776	0.0828732	0.11722	0	0.0793775	0.1711	0	0	0.220375	0.0549831	0	0	0
XLOC_001777	2.90773	4.29702	2.12289	1.57279	2.02912	2.98952	3.14018	2.45565	2.59925	2.91159	4.12885	3.47391
XLOC_001778	0	0	0	0	0.121504	0.23597	0	0	0	0	0	0
XLOC_001779	0	0.692013	0	0	0	0	0	0	0	0	0	0
XLOC_001780	0.606183	0.24238	0.479069	0.347945	18.5484	13.4437	90.5501	61.7444	25.5714	43.3723	6.42012	1.55484
XLOC_001781	7.6206	6.91134	6.98413	6.84164	6.17202	6.40611	8.5304	7.51703	6.6173	7.13096	5.28961	5.25305
XLOC_001782	0.617093	0.738492	0	0	0	0.61579	0.262128	0	0	0	0	0
XLOC_001783	30.4045	30.3522	318.3	253.669	158.47	165.584	83.2859	113.494	51.907	43.5624	210.75	220.929
XLOC_001784	0.39915	0	0	0.381977	0.674362	0	0.283267	0.287153	0	0.540744	0	0.365601
XLOC_001785	0.901625	0.383714	2.5745	2.79933	2.29898	1.49447	1.75345	1.6876	1.53754	1.63236	2.47444	1.30766
XLOC_001786	1.85876	1.85817	0	0	0	0	0	0	0	1.25907	1.66867	0
XLOC_001787	0.364368	0	0.51462	0	0	0	0	0	0	0	0.467713	0.0468145
XLOC_001788	0	0	0	0	0	0	0	0	0	0	0	0
XLOC_001789	0.436076	1.74375	0	0.834629	0.736748	0.355582	0.928418	0.313718	1.15686	1.47692	0	0.798847
XLOC_001790	1.13433	1.24417	0.272949	1.26873	1.12667	0.796009	1.29021	0.703662	1.00663	0.693434	0.811198	0.163329
XLOC_001791	0.523666	0.928601	0.42885	0.553979	0.85577	0.118007	0.22394	0.312342	0.40352	0.588178	1.23424	0.265114
XLOC_001792	0.359308	0.179597	1.5971	1.20907	2.74817	1.17193	1.03201	2.60155	1.66811	2.31215	1.93537	1.98273
XLOC_001793	0.938287	0.937989	0.810953	1.24411	3.46769	1.64226	1.58146	1.26565	1.49705	1.9067	2.3164	2.25598
XLOC_001794	29.6876	29.8619	30.0506	24.1883	28.8054	25.8564	29.4177	35.9707	39.4399	33.1837	20.3805	20.7941
XLOC_001795	0.338874	0.7631	0.167789	0.0845105	0.0760114	0.0690444	0	0.30463	0.228383	0.0573294	0.157698	0
XLOC_001796	0.300271	0.200117	0.593192	0.766272	0	0.0816148	0.0710317	0.216018	0.0663821	0.135596	0	0.183355
XLOC_001797	0	0	0	0	0.461994	0	0	0	0	0	0	0
XLOC_001798	0.849852	0	0	0.11384	0	0	0	0	0	0	0	0
XLOC_001799	0.0872152	0	0.0861478	0.166926	0	0.0711163	0.123789	0.0627436	0.198359	0.395713	0	0.159769
XLOC_001800	0	0.369246	1.09453	0.353471	0.936055	0.602366	0.524256	0.531448	0.24497	0	0.331588	0
XLOC_001801	0.991696	1.44201	0.534305	0.172551	0.380787	0.441077	0.767763	0.454005	0.478338	0.488541	0.323736	0.24773
XLOC_001802	2.02019	0	1.99546	0.966636	1.70655	0.823642	0.71684	2.90669	1.33983	0.684207	0	2.77558
XLOC_001803	0	0	1.83602	0	0	3.03132	3.95736	1.33722	0	1.25907	1.66867	0
XLOC_001804	0	0	0	0	0	0	0	0	0	0	0	0
XLOC_001805	1.65904	1.10567	6.55494	5.2922	7.94165	5.4112	2.35476	3.97843	1.2837	2.62216	15.1419	16.209
XLOC_001806	12.4711	13.3576	13.9683	13.5329	16.4608	12.8929	13.3547	15.5405	15.2129	13.0484	16.6935	16.9303
XLOC_001807	21.4743	24.2569	19.7693	22.3278	69.3933	39.6234	19.5599	23.793	20.9431	21.3944	46.1727	42.5686
XLOC_001808	3.20897	4.50877	2.8254	5.70226	5.41809	5.58815	3.84353	4.22996	4.20868	7.29455	5.28727	3.25486
XLOC_001809	3.06152	7.14129	7.05612	5.85961	7.75864	11.6499	8.69075	7.34164	10.1524	8.29512	6.41297	3.73893
XLOC_001810	0.241045	0.321292	0.408184	0.39026	0.135748	0.393102	0.115518	0.235566	0.213156	0.22035	0.564711	0.44157
XLOC_001811	0	0.343363	1.31808	0	0.582761	0.278473	0	0	0	0.488972	0.0791392	0
XLOC_001812	0.247473	0.494789	0.733334	0	0	0.201793	0.175626	0.178035	0	0	0.222164	1.13336
XLOC_001813	0	0	0	0	0	0	0	0	0	0	0	0
XLOC_001814	121.821	23.228	86.8097	130.39	41.9344	44.6409	104.08	136.525	86.4577	130.185	112.889	116.051
XLOC_001815	0.743122	0.966791	2.23646	0.857209	1.11322	1.32799	2.12425	1.64075	1.27395	0.682505	1.24787	1.454
XLOC_001816	10.8513	11.0198	9.89024	10.587	9.95878	9.96591	12.2929	11.1664	12.9673	13.2839	11.0701	9.34631
XLOC_001817	7.59059	8.03552	0.0664421	0.161272	0.0859734	0.428479	0.190935	0.412241	0.625474	0.660481	0.183339	0.0617596
XLOC_001818	7.98363	10.2886	17.0103	18.7354	13.6218	16.2799	9.06549	8.19071	6.88539	7.22872	15.1479	15.2556
XLOC_001819	9.85827	10.1917	15.2379	17.7591	12.8311	14.0209	13.1796	12.4004	11.1834	11.7461	16.1514	16.2611
XLOC_001820	8.05518	9.18148	11.4988	11.9536	5.60179	10.1191	10.5786	11.8314	14.2997	13.0495	4.07309	6.9228
XLOC_001821	1.88167	2.18114	8.75283	9.51805	6.79964	6.90248	3.2345	3.46359	5.36602	4.18792	2.17187	3.77473
XLOC_001822	12.7986	12.7946	19.5556	15.1186	15.0349	15.8173	16.0369	12.6603	12.4672	11.1077	19.7479	21.9804
XLOC_001823	39.0702	43.0263	79.3208	76.273	61.2028	62.8124	41.4145	39.4927	32.9893	33.3335	62.3729	71.1673
XLOC_001824	57.1945	56.0987	75.1739	75.5131	103.524	93.2741	81.1135	80.6309	70.2684	71.4334	90.8563	84.096
XLOC_001825	14.3112	16.3396	36.9509	35.9828	21.9424	22.776	20.4488	21.5574	18.6523	17.7507	26.0741	26.1113
XLOC_001826	6.8371	6.27907	21.7284	19.9133	3.26448	6.54462	3.0311	5.34639	4.73167	5.63803	17.3461	22.5992
XLOC_001827	0.351649	0.439422	0.0868364	0.08413	0.0742637	0.0716847	0	0	0.0583054	0	0	0.161046
XLOC_001828	16.939	21.7044	5.2283	4.33754	15.1326	13.1611	15.635	13.233	21.5223	21.4636	14.1999	12.1873
XLOC_001829	16.568	16.1163	19.5715	25.0797	5.68534	6.86785	10.3678	9.07007	13.2228	11.8673	14.6846	15.6891
XLOC_001830	19.6457	22.1289	1.3324	1.75427	1.25636	1.29734	0.589101	0.497652	0.84875	0.679426	6.83103	8.96553
XLOC_001831	32.3085	36.4997	39.9969	39.89	81.6301	73.1601	38.5319	39.2526	51.8448	49.6383	100.469	101.546
XLOC_001832	27.4749	28.0844	22.9064	25.8279	22.7616	24.8166	27.3352	26.6597	27.831	27.9459	20.1841	22.9808
XLOC_001833	28.3251	30.2406	28.8575	31.2464	28.8241	27.8577	30.7307	29.0848	45.9591	36.2112	25.6208	26.6061
XLOC_001834	0.622574	0	0	0	0	0	0	0.895773	0.82581	0.421713	0	0.570246
XLOC_001835	3.96987	5.65524	7.78582	6.30476	8.20246	11.0848	1.65357	2.38351	1.86985	0	11.9479	16.7529
XLOC_001836	0.809019	0.635456	0.0570799	0.331805	1.12276	0.801044	4.38808	2.91009	1.3414	2.30945	0.570648	0.351788
XLOC_001837	15.5037	13.8938	16.9448	16.6856	13.6268	13.5101	11.4251	13.4629	10.7111	11.3947	13.0156	14.6668
XLOC_001838	5.45555	5.22173	25.105	24.1455	6.62946	9.59394	2.7302	3.32466	2.69213	2.27837	20.0579	31.3796
XLOC_001839	0	0	0	0	2.2673	0	1.1575	1.78255	0	0	0	0
XLOC_001840	134.946	145.514	118.959	95.1449	68.0678	70.8261	59.0287	64.2017	69.2434	63.6777	70.1979	76.5827
XLOC_001841	5.53443	6.86332	9.68782	7.30758	10.0606	8.96856	10.2914	10.7854	8.45623	9.2535	9.62238	10.331
XLOC_001842	5.26003	5.72505	7.46377	7.5943	5.9384	5.61688	4.40191	4.35159	4.44253	3.85287	6.25113	5.47785
XLOC_001843	2.99639	1.96954	20.0519	27.4432	3.4034	7.3487	3.67262	1.65668	3.59121	1.94188	5.14207	5.34416
XLOC_001844	119.377	132.017	17.2759	18.1672	63.6215	78.6139	41.6657	41.7559	103.872	89.6313	47.922	43.2043
XLOC_001845	727.568	740.144	58.9119	42.7107	93.8986	90.1005	120.071	104.483	207.967	200.665	46.4983	41.9835
XLOC_001846	27.5688	26.4541	1.71853	2.43936	1.4773	1.57439	1.90566	1.95675	9.58521	7.04126	1.23101	1.56243
XLOC_001847	11.7929	10.2808	50.5558	47.0422	37.5674	41.7993	29.588	27.2801	24.1751	20.226	59.6358	69.9749
XLOC_001848	31.3514	30.8095	145.711	140.707	100.827	113.027	84.9802	83.1526	67.6093	57.0567	174.343	222.241
XLOC_001849	454.162	517.695	779.688	731.694	730.837	678.882	705.73	676.776	498.525	522.849	768.107	745.103
XLOC_001850	0	1.21173	0.798186	0.386655	0	0.329457	0.286736	0.290669	1.33984	0.547366	0.362716	0.740156
XLOC_001851	0.611045	0	1.8107	0.584755	0.516179	0.498253	0.867288	0	2.43155	0	0	0
XLOC_001852	12.8481	14.3994	6.1475	5.36933	2.81893	3.80115	4.1298	3.12059	4.03071	4.05603	2.49332	2.76391
XLOC_001853	1.30556	2.61029	2.13095	1.94543	1.05139	1.69147	2.44867	2.91833	3.4635	2.93729	1.63876	1.44402
XLOC_001854	1.20487	1.64824	0.187914	0.182057	0.642826	0.155126	0.405031	0.456207	1.51407	1.37455	0.227714	0.232336
XLOC_001855	1.84667	1.73071	2.31809	2.65083	1.68997	1.85088	2.51187	2.76774	3.39359	3.5181	1.5542	2.14956
XLOC_001856	14.1314	14.2796	22.3932	19.3232	10.9643	12.4553	5.88622	5.87494	2.85037	1.67291	78.6751	65.6385
XLOC_001857	14.3601	13.0412	14.9907	13.6613	28.0251	25.4444	14.158	14.4809	12.1592	13.0965	29.0294	28.6843
XLOC_001858	1.23223	1.57402	0	0	0	0	0	0	0.18161	0.139113	0	0
XLOC_001859	0.370746	0.310213	0	0	0.313187	1.45012	0.920884	0.533438	0.617416	0.840781	0.278575	0.169792
XLOC_001860	0	0	0	0	0	0	0	0	0	0	0	0
XLOC_001861	0.229674	0.287001	0.567157	0.54948	0.72756	0.983212	0.570478	0.743533	1.18052	0.933443	1.44329	1.26221
XLOC_001862	0	0	0	0	0	0	1.75598	0	0	0	0	0
XLOC_001863	0	1.08191	0	0.595788	0	0	0	0	0	0	0.558903	0
XLOC_001864	3.68971	4.65391	1.23342	1.20342	1.03079	1.66068	1.44772	0	6.83113	3.74169	0	1.00068
XLOC_001865	0.354637	0.416052	0	0.372221	0.215476	0.759812	0.512582	0.659984	0.650278	0.825451	0	0
XLOC_001866	6.19932	4.33778	5.77863	0	7.12806	4.49924	11.3876	8.71571	8.73449	1.46787	5.18006	0
XLOC_001867	0	0	0	0	0	0	0.71441	0	0.222549	0.454592	0	0
XLOC_001868	0	0	0	0	0	0	0	0	0	0	0	0
XLOC_001869	1.45515	0	1.43734	0	0.754044	0	0	0	0.218931	0	0	0
XLOC_001870	0	7.94033	24.8721	18.1975	7.01563	9.51118	17.0934	49.3703	26.0946	0	7.07804	20.9679
XLOC_001871	2.91754	0	0	0	0	0	0	0.153811	0	0.818619	0	1.07939
XLOC_001872	694.081	759.063	600.146	596.491	360.469	432.628	194.337	193.176	138.36	114.678	350.064	359.922
XLOC_001873	0	0	0.242669	0.216747	0.120431	0	0.0959684	0	0.169115	0	0.187826	0.163296
XLOC_001874	0.240225	0.351238	0.119727	0.347056	0.210999	0.213364	0.433714	0.174307	0.153762	0.161658	0	0.232215
XLOC_001875	1.24029	0.916019	1.68953	0.861185	2.00054	1.60988	2.29339	1.19927	1.86148	1.81252	1.80002	2.10268
XLOC_001876	0	0	0	0	0.275977	0	0	0	0	0	0	0.897714
XLOC_001877	0	0	0	0	0	0.334232	0	0.147441	0	0.138825	0	0
XLOC_001878	0.404346	0.442274	0	0	0.758211	0	0	0	0.31703	0.285036	0.596743	0
XLOC_001879	0	0	0.221217	0	0	0.182618	0	0	0	0	0	0
XLOC_001880	0	0	0	0	0	0	0	0	0	0	0	0
XLOC_001881	2.13715	4.94992	6.01091	5.23792	8.66357	6.37152	7.98395	8.33099	5.12121	6.41229	11.5237	7.29654
XLOC_001882	0.193595	0.0984914	0.484348	0.475085	0.3252	0.482417	0.204836	0.355768	0.127356	0.264419	0.173509	0.0900123
XLOC_001883	0	0	0	0	0	0	0	0	0	0	0	0
XLOC_001884	7.19726	2.19906	1.44856	2.80683	5.92126	3.40842	1.56112	2.63755	1.19637	1.14984	3.29132	5.06221
XLOC_001885	12.6562	10.8447	24.5561	19.8977	36.2739	31.6971	25.983	29.5912	15.5886	22.0446	18.6658	19.0447
XLOC_001886	0	0	0	0	0	0	0	0	0	0	0	0
XLOC_001887	3.95957	5.48074	9.62735	8.45286	8.23345	9.9344	7.78157	7.45008	5.65617	5.5705	7.10924	5.85862
XLOC_001888	14.3463	18.8235	58.6313	52.342	59.2315	47.9623	24.6894	26.9633	16.413	19.9213	65.0393	50.5907
XLOC_001889	1.25297	5.0103	4.95055	3.59719	6.35067	4.08675	4.44602	3.60561	8.30999	5.94107	5.62414	3.44297
XLOC_001890	0	0	0	0	0	0	0	0	0	0	0	0
XLOC_001891	0.452006	0	0	0	0	0	0	0	0	0	0	0
XLOC_001892	5.79914	4.09716	9.48429	8.19117	1.1407	5.40981	1.84699	2.65379	3.60423	3.47381	7.2549	9.62353
XLOC_001893	0.52226	0	0.511926	0	0.583741	0	0.342846	0.0988218	0.0676313	0	0.123316	0
XLOC_001894	0.830447	0.431257	0	0.158944	0	0	0.11787	0.080377	0.148198	0.0955262	0	0
XLOC_001895	1.30238	0	1.16641	0	0	1.06198	0	0	1.72754	0	0	0
XLOC_001896	0.587795	0.579461	0	0	0	0	0	0	0	0	0.0927615	0.146926
XLOC_001897	0.428525	0.79558	0.544218	0.468672	0.413709	0.149753	0.391004	0.176163	0.36541	0.29027	0.824355	0.392507
XLOC_001898	1.23809	2.18536	4.86637	5.52191	1.84575	1.28541	1.71524	2.55652	2.00972	2.50545	5.0044	2.12071
XLOC_001899	1.26262	0.504887	0.748299	2.17493	0.853275	1.44138	0.89605	0.545005	0.502438	0.623628	2.72037	1.38779
XLOC_001900	0	0.205734	0	0	0.303144	0	0	0	0	0.138421	0.184752	0
XLOC_001901	56.0607	66.2067	50.6979	49.1218	34.7919	38.1995	54.1253	53.5207	49.2107	49.1506	34.5333	37.7721
XLOC_001902	15.0138	15.9645	14.9886	14.3683	17.8896	16.4315	17.8322	15.5766	14.5213	15.6259	21.9247	16.0119
XLOC_001903	37.1933	38.5808	40.0401	43.3695	59.4305	53.359	48.0466	48.8719	47.708	49.4555	69.2462	68.1239
XLOC_001904	35.4063	31.8741	4.94382	8.51509	9.6305	10.3541	10.8533	10.8688	17.0892	15.633	11.0666	8.40472
XLOC_001905	4.85967	3.27395	2.6088	3.03299	2.14184	2.06746	2.17424	2.12806	1.96185	1.78902	1.32777	1.64501
XLOC_001906	4.29768	1.18423	2.16544	3.8365	0.436719	0.691064	2.45997	5.91932	2.56017	3.94068	1.52439	2.3902
XLOC_001907	11.715	11.1469	11.711	9.9728	14.7915	11.8352	8.83137	9.98485	6.96171	7.17052	12.7175	11.743
XLOC_001908	56.0671	57.9266	40.807	44.0278	35.8052	39.2648	54.7343	49.0199	46.0809	46.4278	30.3443	31.8202
XLOC_001909	52.895	54.6828	35.744	37.2011	33.7604	37.8939	51.0045	51.8551	48.3619	46.6921	28.0013	32.5301
XLOC_001910	0	0	0	0	0	0	0	0	0	0	0	0
XLOC_001911	700.84	699.246	1.35513	1.11091	0.713185	2.23736	1.04851	0.303684	0.559931	0.643359	1.32635	1.54659
XLOC_001912	5.92004	7.67116	0.0742992	0.114666	4.6729	7.42969	28.8105	28.9481	40.7862	40.2851	6.47535	4.38932
XLOC_001913	2.48393	1.84963	1.27228	1.21657	3.551	3.87912	6.78999	5.16686	5.23277	4.73604	4.21203	3.27975
XLOC_001914	64.4476	68.8153	30.3099	30.5037	20.4807	26.2924	42.8547	39.606	53.3269	54.2143	15.0595	15.7065
XLOC_001915	204.713	196.569	218.288	212.66	247.784	211.111	164.986	177.479	214.374	200.513	290.458	269.431
XLOC_001916	7.2704	6.01015	9.59824	8.1618	11.5746	11.0017	8.43401	8.44912	6.58374	8.5236	11.673	8.4522
XLOC_001917	0.881518	0.741952	13.7026	18.3945	2.52109	0.52954	0.217001	0.486319	0.492236	0.278721	1.67965	0.69994
XLOC_001918	447.809	451.635	0.490114	0.474839	1.04788	0.404597	0.704264	0.356962	0.987247	0.672203	0.445441	0.227241
XLOC_001919	426.971	454.329	0.770662	0.373322	0.247155	0.715717	0.692121	0.210485	2.00513	1.1891	0.350209	0.446646
XLOC_001920	3.34618	2.98414	11.5326	11.3575	3.07071	3.47444	3.34851	3.87936	1.59659	1.22299	2.46368	4.47613
XLOC_001921	7.89921	12.6929	14.2827	17.2258	14.5619	21.0907	11.8938	13.9527	7.82342	12.9991	16.286	20.3707
XLOC_001922	79.418	24.2503	58.5039	62.6443	9.57159	14.5307	34.4307	40.6461	29.5809	34.3285	38.1909	35.711
XLOC_001923	10.831	9.02077	24.4873	21.8984	71.0695	62.6302	55.5328	50.329	29.5657	33.6119	59.8465	54.9148
XLOC_001924	117.913	105.802	550.593	500.501	252.633	328.386	293.531	291.149	214.58	180.278	245.619	248.529
XLOC_001925	6.23821	6.57866	0.213622	0.23653	0.154472	0.151155	0.175407	0.131553	0.471284	0.536749	0.16416	0.334984
XLOC_001926	28.0973	17.1413	6.38442	6.3344	3.55991	7.3795	7.02583	15.3766	5.73409	12.4336	6.01593	7.56748
XLOC_001927	0	0	0	0.205936	0	0	0.152718	0	0.142722	0	0	0
XLOC_001928	103.498	104.312	119.168	122.497	143.025	145.033	99.127	120.556	115.894	123.195	183.923	182.15
XLOC_001929	0.821975	0.939102	0.368424	0.337119	0.198389	0.0957497	0.250001	0.253431	0.311516	0.15908	0.632495	1.29066
XLOC_001930	122.395	122.356	143.222	130.158	124.752	125.724	77.2468	72.7097	64.6734	51.6066	170.807	167.824
XLOC_001931	18.4335	20.9669	0.286738	0.312527	0.0919585	0.384648	4.01725	3.86352	11.1907	11.5031	0.394958	0.0997094
XLOC_001932	3.3983	1.75341	23.4603	30.0032	9.04496	14.2311	7.38057	11.0488	3.81541	3.75131	13.745	17.0543
XLOC_001933	10.7701	10.0198	7.31984	10.6371	8.43499	6.1045	2.01755	1.92571	0.776231	1.14299	9.25264	5.12759
XLOC_001934	7.43394	6.56469	5.93291	7.20891	3.08704	3.87537	9.36236	8.13179	11.6192	10.314	2.87877	3.13978
XLOC_001935	15.0548	16.6374	14.8702	16.0086	13.4555	13.2244	21.0658	15.6967	20.6456	20.9976	9.11939	11.1253
XLOC_001936	23.7806	22.6566	24.788	23.6253	19.2528	23.1121	25.8407	26.1325	30.637	29.5644	14.7552	13.7664
XLOC_001937	0.632028	0.381709	0.11668	0.272102	0.1329	0.127103	0.109554	0.115331	0.198887	0.217063	0	0
XLOC_001938	2.91145	1.94035	0	1.85746	0.819813	0	0.688728	0	0	0	0	0
XLOC_001939	11.9581	12.3426	12.988	14.5116	12.1135	11.2741	13.0374	12.3006	14.2493	12.7816	9.71062	11.3882
XLOC_001940	174.403	155.238	149.221	166.486	195.525	155.918	170.713	164.043	179.844	175.628	221.12	197.373
XLOC_001941	1.7826	1.03573	28.1091	41.4154	5.23109	0.920466	1.93351	0	0.68714	0	3.37438	0
XLOC_001942	0.362598	0.362483	0	0	0	0	0	0	0	0	0	0
XLOC_001943	26.2545	31.8596	83.8669	76.0064	109.451	94.3124	73.0203	82.8309	96.8883	85.2392	112.155	112.08
XLOC_001944	11.4277	12.0221	19.0528	17.6057	30.7707	25.1476	21.4559	24.301	16.3162	16.1743	32.4183	25.0088
XLOC_001945	25.8967	25.5364	18.6505	22.9863	21.4679	21.4678	23.0055	25.7187	28.0259	27.2575	20.4047	21.4269
XLOC_001946	5.34019	4.93925	3.5362	3.42384	4.63457	3.65592	4.49655	4.34036	4.79128	4.60869	5.31324	4.85954
XLOC_001947	76.014	77.6171	46.9064	40.6651	57.2405	53.1048	63.3384	62.6156	92.0644	89.2656	43.8416	45.0526
XLOC_001948	0	0	0	0	0	0	0	0	0	0	0	0
XLOC_001949	6.55616	3.52317	0.305536	0.118339	1.14956	0.554583	3.59808	1.82372	1.68128	2.80606	0.277531	0.39643
XLOC_001950	6.31995	5.96123	6.38789	6.15791	4.72314	5.6512	7.43681	5.97418	8.96403	8.0835	7.12566	10.1409
XLOC_001951	7.40335	6.32084	8.40729	7.20281	13.9144	14.8093	11.874	13.1189	8.0837	9.46596	9.40492	8.50944
XLOC_001952	0	0	0.140436	0	0	0.0578924	0.0483147	0	0	0.0463927	0	0
XLOC_001953	0	2.8266	6.98223	1.35292	1.19426	3.45836	2.00661	3.0512	3.75052	6.70341	3.80749	3.88476
XLOC_001954	2.13505	1.69944	1.90681	1.09905	1.61087	2.02821	1.6409	1.54865	1.5014	1.42461	1.9042	1.12223
XLOC_001955	5.99935	6.40636	4.84849	6.26316	8.06262	5.78138	8.70872	9.02436	10.1281	9.79	5.6306	4.62088
XLOC_001956	2.93612	2.51588	0	0.8028	1.06298	1.36808	2.0837	0.905262	1.39093	1.70472	0.753098	0.768382
XLOC_001957	8.29271	9.77028	12.4314	14.3758	5.19183	8.84389	5.07708	5.03111	6.15939	5.72182	6.33728	9.92922
XLOC_001958	2.4293	1.9109	2.7891	3.89716	1.17893	1.28473	0.600975	0.411236	1.77031	1.54302	1.86482	2.28946
XLOC_001959	0	0.421097	0.832151	1.20932	1.32867	0.343477	0.728356	0.909115	0.956422	1.9973	1.5126	1.81362
XLOC_001960	0.909828	0.818585	1.07843	1.30603	0.481592	0.445131	0.940342	0.392724	1.30197	1.66398	1.63356	0.774969
XLOC_001961	0	0	0	0	0	0	0.158566	0	0	0	0	0
XLOC_001962	0.0556745	0	0.0549931	0	0.0470309	0.0907953	0.0790217	0.0400529	0.0369246	0.0377122	0.0999612	0
XLOC_001963	3.14822	2.62988	3.01173	2.26673	3.64356	3.78307	1.60592	2.54028	3.67349	0.756241	3.82531	2.49291
XLOC_001964	5.53356	6.14645	2.67343	0.625357	1.55815	2.00539	1.30901	1.76929	1.22333	1.6659	1.10392	1.23315
XLOC_001965	6.93054	8.06615	7.99863	7.40768	20.6697	12.6969	12.5571	13.3234	11.6743	11.9675	17.6356	10.3948
XLOC_001966	0.570543	1.14072	0.845341	0.545996	2.89179	0.930455	0.607351	1.43659	1.13519	1.35264	1.53658	0.522588
XLOC_001967	0	0	0	0	0	0	0	0	0	0	0	0
XLOC_001968	0	0	0	0	0	0	0	0	0	0	0	0
XLOC_001969	0	0	0	0	0.497744	0	0	0	0	0	0	0
XLOC_001970	0	0	0	0	0	0	0	0	0	0	0	0
XLOC_001971	0	0	0	0	0	0	0	0	0	0	0	0
XLOC_001972	0.709837	0	0	1.27642	0.92667	0.257516	0	0	0	0	0.827289	1.75488
XLOC_001973	5.52498	6.90404	0.909561	0.440606	15.1684	6.7577	12.0896	12.5867	26.2608	18.4004	11.1599	6.74747
XLOC_001974	8.84538	7.23756	5.89287	7.79352	8.91405	6.99113	9.81655	11.0037	14.4531	11.4273	8.86433	6.51608
XLOC_001975	1.27728	0.212813	0	0.611164	0.53949	0.348403	0.605524	0.306297	0.282374	0.496588	0.619502	0.73362
XLOC_001976	0	0	0	0	0	0	0	0	0	0	0	0
XLOC_001977	0	0	0	0	0	0	0	0	0	0	0	0
XLOC_001978	0	0.756364	0	0	0	0	0	0	0	0	0	0
XLOC_001979	3.89941	3.33435	3.55707	3.30158	3.10961	2.03978	3.52115	5.24904	4.00274	3.47272	1.1174	1.41394
XLOC_001980	123.317	131.953	92.4733	79.8496	91.8449	88.9645	98.5565	101.545	121.23	126.782	87.329	84.5423
XLOC_001981	68.9588	72.6083	57.0017	63.7851	70.5895	87.2397	75.2044	75.58	98.9956	111.428	86.8646	84.7258
XLOC_001982	88.9249	77.2106	74.0258	71.9312	96.4462	90.8821	96.2863	96.484	121.753	134.674	104.746	103.962
XLOC_001983	0	0.205436	0.240445	0.208982	0	0	0	0	0	0	0.518987	0.155479
XLOC_001984	9.04624	8.61553	13.6514	13.6173	12.8497	14.6281	10.6406	13.023	13.1409	12.9078	14.7534	15.2683
XLOC_001985	0	0	1.39717	0.132745	0.350359	0.532287	0.828252	1.35775	0	0.531596	0.0466485	0.158533
XLOC_001986	6.44483	6.69545	4.32986	3.06362	4.27	3.57216	5.56024	5.42438	5.95058	6.1631	5.10504	5.78739
XLOC_001987	0	0	0	0	0	0	0	0	0	0	0	0
XLOC_001988	60.1575	51.8031	56.0333	47.5234	43.4024	41.5685	51.1039	43.3312	31.4394	35.7247	40.1163	36.8249
XLOC_001989	0	0	0	0	0.53823	0	0	0	0.784948	1.08723	0	0
XLOC_001990	412.794	451.163	861.075	659.316	442.79	417.393	241.378	180.158	103.195	101.136	805.697	517.957
XLOC_001991	39.8763	46.8463	52.7493	43.1645	134.648	155.021	108.695	137.611	59.5695	93.7674	72.5538	57.2015
XLOC_001992	0.373544	0.746852	0.737946	0.178737	1.10443	1.37067	1.06038	1.34366	0.371615	0.506055	0.335342	0.855369
XLOC_001993	0	0	0.42873	0	0	0	0	0	0	0	0	0
XLOC_001994	4.38242	3.2128	0.0378544	0.124682	0.0733517	0.177011	0.0543944	0.137851	0.287947	0.117636	0.0779522	0.175511
XLOC_001995	0.632847	0.722103	2.82611	1.67619	2.39661	2.47048	1.13801	1.90791	1.67709	1.35472	10.2285	8.36076
XLOC_001996	1.37149	2.09691	2.0719	1.85292	5.38391	4.67067	3.54973	3.48235	3.47789	3.33349	3.1867	3.99033
XLOC_001997	1.13427	1.31044	1.40492	1.09049	2.80569	2.22994	1.76129	1.83757	1.57768	1.42173	1.94552	0.984006
XLOC_001998	4.42984	4.13132	3.59153	2.83825	5.78006	5.18265	4.84405	4.99488	3.02419	3.72928	1.50509	1.61187
XLOC_001999	4.71242	4.11308	10.0223	10.6442	6.51907	5.28826	6.15486	4.99278	4.89704	4.32215	5.5717	6.19157
[truncated: 43,873 more rows]

## Sheet: tpm_per_transcript(TCONS)
transcript_id	gene_id	MdCA-ND-1	MdCA-ND-2	MdCA-0hpd-1	MdCA-0hpd-2	MdCA-6hpd-1	MdCA-6hpd-2	MdCA-12hpd-1	MdCA-12hpd-2	MdCA-24hpd-1	MdCA-24hpd-2	MdCA-48hpd-1	MdCA-48hpd-2
TCONS_00000001	XLOC_000001	10.774	10.1919	11.1788	12.533	14.2257	11.8146	13.568	13.6386	13.7484	13.8091	13.4038	14.9431
TCONS_00000002	XLOC_000002	2.53445	1.04047	2.35893	3.19106	2.26495	2.12132	1.00281	1.72704	1.16657	1.4868	3.09643e-05	1.17455
TCONS_00000003	XLOC_000002	6.4354e-06	2.08093	0	0	1.20174e-05	0.424264	1.00281	0	0.583285	2.60075e-07	1.78643	0
TCONS_00000004	XLOC_000003	47.1432	55.5832	49.0762	44.4616	25.3658	44.7787	20.4411	2.51442	6.53188	17.2999	32.021	40.6424
TCONS_00000005	XLOC_000003	23.0975	19.7916	26.0741	22.1037	32.584	21.1561	44.5974	55.1625	60.4974	42.7273	28.4492	22.3508
TCONS_00000006	XLOC_000004	87.0148	83.8748	100.065	101.988	62.7075	63.4684	88.0717	113.655	71.6666	68.8019	26.5784	38.0684
TCONS_00000007	XLOC_000005	0.441899	0.459348	0	0	0	0	0	0	0	0	0.233483	0.230992
TCONS_00000008	XLOC_000005	16.9001	15.8105	11.4929	13.1097	9.23154	10.5596	15.6902	17.7566	21.3125	22.3984	25.638	23.2275
TCONS_00000009	XLOC_000006	18.4461	19.801	12.4714	12.2175	7.83736	7.91044	12.5689	13.6251	20.6521	20.9016	26.8958	25.4347
TCONS_00000010	XLOC_000007	2.67057	2.84771	9.11193e-08	0	73.8735	62.8161	50.6739	43.7459	9.00451	23.0463	3.66045	2.65315
TCONS_00000011	XLOC_000007	0	0	5.3394	4.20305	26.6597	27.2007	5.57473	13.4528	16.3917	4.7476	0	0
TCONS_00000012	XLOC_000008	0	0	0	0	0.321977	0	0	0.215821	0.187835	0	0.17554	0.242944
TCONS_00000013	XLOC_000008	0	0	0	0	0.321977	0	0	0.215821	0.187835	0	0.17554	0.242944
TCONS_00000014	XLOC_000008	1.48427	2.05449	1.57888	1.03799	0	1.04578	0.0606724	1.61654	1.77154	1.36951	1.92061	0.526394
TCONS_00000015	XLOC_000008	0	0	0	0	0.253175	0	1.67626	0	0	0.465453	0	0.882507
TCONS_00000016	XLOC_000009	4.55207	9.21369	4.18276	14.7687	11.401	15.1523	16.6901	0.165631	8.25045	5.97455	7.45461	13.64
TCONS_00000017	XLOC_000009	27.7936	23.2134	16.9922	9.46541	15.4326	15.4308	24.3481	30.6621	29.4218	31.3429	37.9955	31.8635
TCONS_00000018	XLOC_000010	5.77008	7.72656	6.79489	6.3405	6.17074	6.38947	7.20866	7.94081	6.48313	7.75115	9.48366	9.00324
TCONS_00000019	XLOC_000011	3.41378	2.34131	2.24247	1.70324	1.69019	2.19526	1.69231	2.11058	2.58933	2.73266	3.69264	3.16482
TCONS_00000020	XLOC_000011	0	1.47114	0	0	0	0	3.7463e-05	0	0	0	0	0
TCONS_00000021	XLOC_000011	0.626575	1.52976e-07	0	0.526709	0.5411	0.508779	0.747807	0.575097	0.916129	0.643067	0.944312	1.31681
TCONS_00000022	XLOC_000012	7.61456	6.35577	3.35906	3.96184	3.51746	2.64085	2.24821	2.23042	4.93169	4.68023	5.78561	6.10932
TCONS_00000023	XLOC_000013	0	0.486498	0	0	1.18305e-06	0	0	0.888016	0	5.80607e-05	0	0
TCONS_00000024	XLOC_000014	0	0	0	0	0	0	0	0	0	0	0	0
TCONS_00000025	XLOC_000014	4.44183	2.53738	3.34439	2.74565	3.4179	4.84712	5.89635	1.6093	6.48156	6.12324	2.52507	2.57893
TCONS_00000026	XLOC_000015	0	0	0.0995701	0	0.180989	0	0	0.0821965	0	0.0725193	0.200566	0.204844
TCONS_00000027	XLOC_000016	0	0	0	0	1.07716	0	0	0	0	0	0	0
TCONS_00000028	XLOC_000017	9.88889	8.97869	10.1564	13.1623	17.7551	17.1959	17.5129	14.2442	19.8425	19.4647	17.4687	18.9392
TCONS_00000029	XLOC_000018	2.61188	2.60774	3.77992	3.1727	8.9515	5.2729	7.37657	4.95859	4.08533	4.50987	5.09703	3.78864
TCONS_00000030	XLOC_000019	4.84554	5.8851	5.40932	4.73229	6.28903	6.74019	6.99243	6.4564	5.36852	5.73913	6.96929	6.8028
TCONS_00000031	XLOC_000020	1.0205	0.738868	0.0842148	0	0	0	0	0	0	0	0	0
TCONS_00000032	XLOC_000021	0	0	2.09619	0.7747	0	3.97951	0	0	0.0419168	0	0	0.090794
TCONS_00000033	XLOC_000022	3.58332	3.58219	4.86677	5.57237	2.61369	4.10267	3.40538	5.84377	6.03962	6.12247	6.83255	7.2817
TCONS_00000034	XLOC_000022	3.50074	4.48452	5.37441	3.90066	5.55688	4.87829	3.25259	2.61048	4.28152	4.40775	4.5243	4.09495
TCONS_00000035	XLOC_000023	10.3114	13.8691	8.88889	11.6619	7.74207	9.10125	8.07702	7.9494	7.71689	9.30637	13.8018	10.5404
TCONS_00000036	XLOC_000023	0	0	0	0	0	0	0	0	0	0	0	0
TCONS_00000037	XLOC_000024	35.415	36.6553	41.5425	31.3072	34.3554	29.0102	25.807	22.0645	25.8257	17.6322	17.6121	17.5719
TCONS_00000038	XLOC_000024	7.55733	14.8777	16.4214	19.762	10.3466	19.4976	12.1722	14.9893	6.54362	11.2448	11.547	9.62154
TCONS_00000039	XLOC_000025	0.5322	0	0	0	0	0	0.449575	0	0	0	0	0
TCONS_00000040	XLOC_000026	2.81284	5.44346	0.0992064	0.0768915	0.144262	0.0919938	0.0339371	0.0655171	0	0.0144509	0.0799334	0.0408192
TCONS_00000041	XLOC_000026	3.1932	0.603072	0	0	0	0	0	0	0	0	0	0
TCONS_00000042	XLOC_000027	6.38588	6.2917	0.2052	0	0.279745	0	0.0877449	0.0932544	0	0	0	0
TCONS_00000043	XLOC_000027	0	0	0	0.127507	0	0.438545	0	0	0	0	0.0793856	0
TCONS_00000044	XLOC_000028	0.674657	0	0	0	0	0	0	0	0	7.15872e-08	4.82105e-09	0.249268
TCONS_00000045	XLOC_000028	0.674657	1.73393	1.59088	1.89873	0.222442	1.07666	0.837256	0.909203	0.791305	1.42606	0.493006	0.249268
TCONS_00000046	XLOC_000028	0.00113977	1.74473	0.817368	0	1.23865	0.712001	0.951427	0.655499	2.07318	1.18251	1.47769	0.000812436
TCONS_00000047	XLOC_000028	0.00113977	0	0	0	0	0	0	0	0	0	0	0.000812436
TCONS_00000048	XLOC_000028	1.68317	0	0	0	0	0	0	0	0	0	0	1.41673
TCONS_00000049	XLOC_000028	0.147329	0	0	0	0	0	0	0	0	0	0	0
TCONS_00000052	XLOC_000028	0	0	0	0	0.0629778	0	0	0	0	0	0	0
TCONS_00000053	XLOC_000028	2.65901	0.552618	0.200684	0	0.100905	0	0	0	0	0.187769	0.20448	0.347879
TCONS_00000054	XLOC_000028	0.807833	1.25091	0.369412	0.518587	0	0.270652	0.374412	0.190534	0.524816	0.1243	0.334521	0.250642
TCONS_00000055	XLOC_000028	0	0	0	0	0	0	0	0	0	0	0	0
TCONS_00000050	XLOC_000029	0.390724	0	0.14572	0.141178	0.0441458	0.0450418	0	0.280685	0	0.0488679	0.195684	0.196068
TCONS_00000051	XLOC_000029	0.139866	0.408354	0	0	0	0	0.172533	0	0.193261	0.0792785	0	0.143594
TCONS_00000056	XLOC_000030	0	0	0	0	0	0.255044	0	0	0	0.144349	0	0
TCONS_00000057	XLOC_000030	0.00115382	3.34206e-09	0.000321057	0.000461786	0.000339798	0.000206621	0.000123616	0.000274902	0.000353101	0.000298956	0.00116343	0
TCONS_00000058	XLOC_000030	3.87543	3.58774	0.957079	0.762623	0.675161	0.661653	0.438103	0.546216	0.676924	0.951642	1.67501	1.71324
TCONS_00000059	XLOC_000030	0	0	0	0	0	0	0	0.111172	0.00322989	0.000163339	4.48212e-05	0
TCONS_00000060	XLOC_000030	2.22771	2.97321	0.529632	1.19621	0.90329	1.06425	1.77919	0.967654	1.60843	2.06114	0.13598	0.239773
TCONS_00000061	XLOC_000030	1.41022	0.869304	18.6541	18.735	10.7297	11.4283	7.12271	10.9001	8.25126	8.74957	7.06275	5.53853
TCONS_00000062	XLOC_000031	4.4836	4.48217	18.6006	6.86511	11.2701	15.6056	9.09001	8.04315	8.27294	9.03154	7.13669	5.46669
TCONS_00000063	XLOC_000031	4.4836	4.48217	18.6006	6.86511	11.2701	15.6056	9.09001	8.04315	8.27294	9.03154	7.13669	5.46669
TCONS_00000064	XLOC_000032	5.30408	5.6757	14.7346	13.1178	17.8602	18.8789	18.0565	16.5188	10.574	10.9323	7.90333	9.00764
TCONS_00000065	XLOC_000033	2.76853	2.18974	0	0	0	0	0	0	0	0	0.361795	0.156299
TCONS_00000066	XLOC_000033	0	0.727562	0	0	0.124987	0	0	0	0	0.10016	0	0
TCONS_00000067	XLOC_000033	0.0525006	0.0573113	0.101324	0.245415	0	0	0	0.0836446	0.109197	0	0	0.15638
TCONS_00000068	XLOC_000034	5.92238	5.97379	4.49059	2.95862	3.99904	4.0532	5.06676	3.29859	5.57503	5.50589	5.89628	6.07887
TCONS_00000069	XLOC_000035	3.47216	3.1436	1.8119	2.0062	1.23506	1.44014	1.16217	1.38891	1.02284	1.084	1.30348	1.02065
TCONS_00000070	XLOC_000035	5.86545e-08	2.34661e-07	3.98153e-08	1.62051e-07	6.63641e-08	2.70267e-08	1.74411e-08	7.4631e-08	5.94725e-08	2.06123e-08	1.42472e-07	1.14695e-08
TCONS_00000071	XLOC_000036	0.978664	1.37279	0.68028	0.480639	0.0479098	0	0.288747	1.32752	1.43124	1.41751	1.78569	1.05949
TCONS_00000072	XLOC_000037	40.91	43.0277	49.6491	44.6456	44.4328	42.9485	58.2146	57.4964	51.4693	59.2456	51.7912	47.482
TCONS_00000073	XLOC_000038	4.78209	5.41798	3.9363	2.89835	1.43101	0.58402	1.61586	2.98952	3.22983	2.86691	3.80591	3.23924
TCONS_00000074	XLOC_000038	4.21693	4.4432	0.508141	2.56686	1.52082	2.74474	1.74652	0.114981	2.22917	1.36609	1.12946	1.33251
TCONS_00000075	XLOC_000039	3.85646	5.14032	5.07902	0	0	0	1.08591	2.0964	0.912279	0.924793	0.852564	0
TCONS_00000076	XLOC_000040	2.49774	2.85063	1.25523	2.34834	2.95038	2.44835	4.21991	3.60886	2.86101	2.86873	0.900934	1.09824
TCONS_00000077	XLOC_000040	0	0.727117	0	0	0	0	0	0	0	0	0	0
TCONS_00000078	XLOC_000041	11.0672	10.3108	13.7388	13.3774	11.4492	10.7111	8.78797	9.54809	8.12766	8.16565	6.83059	5.51949
TCONS_00000079	XLOC_000041	14.6146	17.2106	23.572	14.3567	28.631	28.3154	19.403	18.3447	12.9642	18.476	13.4521	17.3148
TCONS_00000080	XLOC_000041	0.537087	0	0	0	0	0	0	0	0	0	1.89377	1.59598
TCONS_00000081	XLOC_000041	0	0	0	0	0	0	0	0	0	0	0	1.2854
TCONS_00000082	XLOC_000041	2.25277	1.77907	7.81546	7.84362	12.036	8.38149	7.48567	6.18087	2.00549	4.23175	12.2788	6.77439
TCONS_00000083	XLOC_000041	8.20737	13.9092	7.37748	6.79411	38.8792	30.5582	28.3609	23.1344	17.1666	15.807	19.4459	17.9118
TCONS_00000084	XLOC_000041	0.532492	0.869241	13.7719	11.8399	24.7147	35.3495	26.6667	25.0318	19.0253	18.2532	14.5898	12.4653
TCONS_00000085	XLOC_000042	0	0	0	0	0	0	0	0	0	0	0	0
TCONS_00000086	XLOC_000043	0.461834	0.692154	0.243228	0.377894	0.693704	0.394704	0.167215	0.250986	0.21844	0.203963	0.0408283	0.166797
TCONS_00000087	XLOC_000044	3.68173	0.855816	0	0	0	0	0	0	0	0	0	0
TCONS_00000088	XLOC_000045	2.56485	2.77193	0.410831	0.630209	0.124462	0.190481	0.0878371	0.0565245	0.0737923	0.0997395	0.666634	0.328688
TCONS_00000089	XLOC_000046	29.3916	31.4307	23.2116	19.501	38.9493	33.1009	22.4397	19.2586	30.8709	27.7787	24.6049	22.1195
TCONS_00000090	XLOC_000046	26.4292	24.6341	13.0431	12.9647	21.0395	23.8939	36.253	23.2349	23.647	25.3835	34.5383	32.7743
TCONS_00000091	XLOC_000047	0.535228	0.759242	0.448008	0.115416	0.903839	0.681824	0.383143	0.737545	0.826474	0.407869	0.485042	0.534083
TCONS_00000092	XLOC_000047	4.48675	3.69402	1.60078	0.760672	1.164	2.33125	1.48757	1.30018	3.85141	3.92092	1.73797	3.76263
TCONS_00000093	XLOC_000047	0.38134	0	0	1.69845	0	0.112826	0	0.0174483	1.12492	0	2.17802	1.32848
TCONS_00000094	XLOC_000048	1.52337	2.72172	2.44839	1.78276	1.06787	0.263573	1.4585	0.594842	0	0.621052	1.59398	0
TCONS_00000095	XLOC_000048	0.831311	1.00332	1.54008	0.636447	0.8159	0.153208	0	0.516807	1.60317	0	1.1168	1.34763
TCONS_00000096	XLOC_000048	1.05342	1.27147	0.308683	0.755741	0.884425	0.732838	0.776703	0.805795	0.645664	1.10607	0.724492	0.645164
TCONS_00000097	XLOC_000048	1.75119	1.23416	0.50891	0.371044	0	0.856362	1.0094	0.533855	0.330824	0.887378	1.11063	0.899049
TCONS_00000098	XLOC_000048	4.91939	4.61898	3.65979	2.50538	1.36651	1.79667	2.43312	2.15429	2.59427	3.39169	4.39235	2.86427
TCONS_00000099	XLOC_000049	21.3462	21.7662	10.9079	13.673	6.28549	7.8208	6.70795	8.47088	10.382	11.4868	15.5164	14.4207
TCONS_00000100	XLOC_000050	5.25799	6.90337	34.4188	29.2063	63.4765	64.8314	91.4917	85.304	60.5797	61.7839	24.8214	29.6436
TCONS_00000101	XLOC_000050	3.97016	3.79691	12.549	10.6382	13.7813	14.3034	10.6282	12.5176	8.80096	9.33017	7.49521	7.88851
TCONS_00000102	XLOC_000051	4.56435	6.08387	6.85666	6.18796	6.82924	6.61688	9.39832	7.44364	11.9446	10.3298	9.1446	8.11343
TCONS_00000103	XLOC_000051	13.795	11.5129	10.9041	14.4607	11.6915	16.7872	16.983	16.6326	16.5316	17.9924	17.5932	19.4511
TCONS_00000104	XLOC_000052	1.89293	1.48418	1.31984	1.56286	0.855796	1.0199	1.9753	1.48299	2.6604	2.04808	1.62468	2.71528
TCONS_00000105	XLOC_000053	2.82413	2.46128	2.64651	2.07894	1.17014	1.26021	2.07982	2.30283	3.95704	3.33409	2.97763	3.4826
TCONS_00000106	XLOC_000054	0.150211	0	0	0	0	0	0	0	0	0	0	0
TCONS_00000107	XLOC_000055	0	0.205307	0	0	0	0	0	0	0	0	0	0
TCONS_00000108	XLOC_000056	0.133409	0.133366	0	0	0	0.122196	0	0.108783	0	0.0959757	0	0.180734
TCONS_00000109	XLOC_000057	0	0.321814	0	0	0	0	0	0.131247	0	0.347385	0	0
TCONS_00000110	XLOC_000058	76.6646	85.001	1.37684	1.33393	0	0	0	0	0.989219	1.00279	12.0181	10.386
TCONS_00000111	XLOC_000059	9.04894	4.53956	28.4591	20.7397	17.0264	9.10434	8.51714	18.2689	7.15547	9.94444	13.6819	8.92402
TCONS_00000112	XLOC_000060	0.471709	0.133489	0	0	0.250426	0.115589	0	0	0	0.113484	0	0.0186523
TCONS_00000113	XLOC_000061	1.25097	0.240459	0	0	0	0	0	0	0.0757824	0	0.0708219	0
TCONS_00000114	XLOC_000061	0.592148	0.711738	0.255963	0.247985	0	0	0	0	0	0	0	0.17553
TCONS_00000115	XLOC_000062	2427.21	2789.77	2600.4	2118.53	2172.17	2491.6	2132.15	1702.78	1840.06	1726.86	1484.37	1445.23
TCONS_00000116	XLOC_000063	248.761	247.635	0.447837	0.289253	0	0	0	0.123232	0.107252	0	11.3785	7.24195
TCONS_00000117	XLOC_000063	73.8197	71.9698	0	0	0	0	0	0	0	0	2.91891	1.63436
TCONS_00000118	XLOC_000064	7.15149	7.10397	13.3679	11.0887	6.46073	6.26019	14.4912	16.7561	11.2426	11.1363	7.9851	6.86773
TCONS_00000119	XLOC_000065	5.24641	6.41957	29.0618	26.7301	26.281	27.9677	15.1216	18.1387	24.0373	21.5137	10.7448	8.78489
TCONS_00000120	XLOC_000066	1.08779e-06	1.98656	7.28469	3.37675	5.93146	4.2471	5.15819	6.61583	5.74888	4.53845	0.0213804	2.55611
TCONS_00000121	XLOC_000066	8.44364e-08	5.84914e-10	0.103425	0.0552835	1.12519e-09	1.68317e-09	1.42828	1.25501e-09	1.21191e-09	2.14608e-10	2.05609e-07	6.12317e-07
TCONS_00000122	XLOC_000066	2.05855	0	0.0017232	3.39252	0	1.86418	0.0217805	0.817146	0	0.732004	3.53063	2.08295
TCONS_00000123	XLOC_000066	6.56836e-10	0	0.000760903	1.5912	0	0.817154	0.00944894	0.376093	0	0.321066	1.67936	0.8916
TCONS_00000124	XLOC_000066	0	8.48358e-09	1.8309	0.791588	1.72179e-08	3.0573e-08	3.34811e-09	1.92045e-08	1.8308e-08	3.88978e-09	2.80247e-06	1.20915e-05
TCONS_00000125	XLOC_000067	3.78349	3.82281	4.65195	3.45559	8.06814	6.50053	8.04742	5.16431	3.92065	4.12137	10.0052	8.28018
TCONS_00000126	XLOC_000068	0	0	0	0	0	0	0	0	0	0	0	0
TCONS_00000127	XLOC_000069	6.56367	7.32456	5.05097	5.55089	4.45355	4.82357	4.7065	4.79199	9.47865	7.57712	5.71987	6.82414
TCONS_00000128	XLOC_000070	4.23546	6.33589	1.61372	2.412	0.791697	1.29741	0.726807	0.864888	0.761705	0.29383	1.20212	0.85435
TCONS_00000129	XLOC_000071	0	0.512735	0	0	0	0	0	0	0	0	0	0
TCONS_00000130	XLOC_000072	43.5498	34.598	26.1565	27.1953	31.2904	24.398	32.5857	41.7753	41.834	39.1664	40.2768	35.9211
TCONS_00000131	XLOC_000072	0.838778	0.405565	0.628271	0.401468	2.02294	0.754197	0.865894	1.18317	1.72747	0.586385	0.824228	0.96533
TCONS_00000132	XLOC_000073	3.00956	3.41049	0.693524	0.686057	0.866244	0.93655	0.892129	1.27581	1.20219	1.10631	1.27973	1.23992
TCONS_00000133	XLOC_000074	7.76387	8.90202	4.33895	3.32387	3.57663	3.74279	4.65999	5.91425	3.2624	4.63001	5.55568	4.77462
TCONS_00000134	XLOC_000075	5.25537	4.17871	8.68155	7.34535	10.6178	9.16222	9.62282	9.06348	9.98129	10.1543	6.55104	7.23665
TCONS_00000135	XLOC_000076	0	0.510305	0.519773	0.607246	5.85978	4.45627	1.19702	2.01891	1.7864	0.799822	0.841691	0.254259
TCONS_00000136	XLOC_000076	0	0.515424	0.133027	0.548002	0.331484	4.18177	0.488974	1.28694	1.32087e-06	1.79539	0.559417	0.332548
TCONS_00000137	XLOC_000077	1.67634	1.08241	2.18642	1.93137	1.35105	1.76726	0.739991	0.707116	1.54777	0.973423	2.15311	1.57195
TCONS_00000138	XLOC_000078	108.727	112.9	96.8893	95.801	92.0545	75.1833	73.087	87.5651	89.4174	81.6486	44.6863	55.2001
TCONS_00000139	XLOC_000078	2145.5	2177.1	1373.6	1385.04	1281.07	1378.89	1265.29	1129.83	1139.85	1191.78	1190.71	1158.84
TCONS_00000140	XLOC_000079	78.3461	71.2928	35.1511	39.6656	49.8851	57.55	66.381	78.3177	83.8246	76.523	81.3889	88.46
TCONS_00000141	XLOC_000080	16.532	14.1479	13.3932	16.2742	8.86889	9.05118	13.9599	20.3268	21.703	21.6463	22.8971	21.8476
TCONS_00000142	XLOC_000081	90.7074	76.8252	0	0	2.82459	1.2378	1.76958	4.83682	4.41624	5.09396	6.10815	5.54762
TCONS_00000143	XLOC_000082	11.9621	12.7702	4.39451	2.01671	1.9959	2.37709	1.20569	2.7208	1.20116	2.1971	2.8902	2.76712
TCONS_00000144	XLOC_000082	21.6509	21.4071	3.36564	7.66322	0.996328	1.03585	1.68218	1.37911	4.186	2.38598	4.08427	4.86503
TCONS_00000145	XLOC_000082	6.63522	26.7197	8.35703	3.85293	3.84356	0.572501	1.70667	2.10907	0.0170788	0	3.1258	1.20989
TCONS_00000146	XLOC_000083	10.3973	11.6721	58.2323	53.7452	15.7297	18.5458	11.4095	12.3121	9.61454	9.4926	7.73897	5.83468
TCONS_00000147	XLOC_000084	3.88988	1.82683	27.0627	10.0427	3.92626	4.47052	3.08271	2.43021	1.04556	2.92159	1.56457	1.54572
TCONS_00000148	XLOC_000084	4.5023	7.31111	23.4256	40.6919	10.1887	13.4848	6.22106	9.78125	9.14489	5.01272	4.97269	3.82629
TCONS_00000149	XLOC_000084	0.609633	1.09826	0.899835	0.444689	0.232875	1.26357	1.0383	1.31154	1.89127	1.55553	1.4196	1.45972
TCONS_00000150	XLOC_000085	0.156789	0.300943	0	0.0366322	0.0811203	0.123054	0.225954	0.146523	1.0164	0.43939	0.305989	0.57657
TCONS_00000151	XLOC_000086	5.33198	7.3084	13.0263	15.3539	73.1528	52.2763	141.776	49.0253	50.9275	63.9168	102.706	93.1195
TCONS_00000152	XLOC_000087	0.671639	0.258241	4.95013	5.29471	5.10188	4.25899	4.58257	4.80258	4.25315	4.38583	3.20095	2.02977
TCONS_00000153	XLOC_000088	218.666	240.057	130.98	103.019	85.8042	83.9463	46.1306	47.3918	115.54	97.2884	135.246	104.786
TCONS_00000154	XLOC_000088	218.666	240.057	130.98	170.232	85.8042	83.9463	105.364	101.596	115.54	97.2884	135.246	159.419
TCONS_00000155	XLOC_000089	0.490046	0	0.242024	0.468962	0	0	0	0	0.521661	0.176272	0	0
TCONS_00000156	XLOC_000090	10.6638	11.2258	57.4824	50.7071	58.6721	47.1	80.5635	88.4872	67.2063	66.9058	33.5056	40.358
TCONS_00000157	XLOC_000091	3.68798	4.80013	2.71741	4.42276	5.62051	5.79077	4.79769	4.48257	5.00635	5.55125	7.60766	6.71885
TCONS_00000158	XLOC_000092	4.12339	2.90073	3.03271	3.46079	8.31469	7.7734	7.35317	6.27987	3.62526	3.31406	5.06419	3.92921
TCONS_00000159	XLOC_000092	1.73397	5.88252	1.59582	0	0	0	0	0.406745	5.68602	4.01803	3.79299	4.08533
TCONS_00000160	XLOC_000093	6.07434	4.27318	0	0.215296	0.403934	0	0	0	0.31932	0	0.149209	0.152392
TCONS_00000161	XLOC_000093	0	0	0	0	0	0	0	0	0	0	0	0
TCONS_00000162	XLOC_000094	441.208	461.079	263.153	274.148	185.693	188.088	184.526	165.738	213.913	211.424	203.244	203.331
TCONS_00000163	XLOC_000095	0	0	0	0	0	0	0	0	0.100214	0	0	0
TCONS_00000164	XLOC_000096	0.262571	0	0	0	0	0	0	0	0	0.188897	0	0
TCONS_00000165	XLOC_000097	16.4563	14.6533	24.8452	23.5532	24.2802	25.4399	28.4614	28.6351	23.3874	29.5751	20.2521	24.1828
TCONS_00000166	XLOC_000098	20.4845	13.1984	28.7089	23.9687	37.991	37.5857	32.8783	31.1861	24.4645	30.6979	18.1815	17.4969
TCONS_00000167	XLOC_000098	0.000900804	6.82906	2.48489	9.14321	1.86399	1.79656	1.63143	1.96375	5.43172	0.000828922	9.12052	11.1917
TCONS_00000168	XLOC_000099	5.46117e-06	3.05894e-05	0	2.00188e-06	7.5314e-07	3.18221e-06	1.04921e-06	1.61838e-05	0.000168069	7.40802e-05	1.04875e-05	4.02497e-06
TCONS_00000169	XLOC_000099	0.17487	0.413931	0	0.025878	0.0123308	0.0958683	0.0359821	0.26497	2.62869	2.21482	0.11377	0.163235
TCONS_00000170	XLOC_000099	1.93787	3.7567	0	0.232383	0.116966	1.04748	0.405138	2.51341	2.78875e-08	1.90229e-06	0.98095	1.91081
TCONS_00000171	XLOC_000099	5.88224	5.57169	3.39506	3.2599	1.38993	0.567135	2.61531	0.504938	1.89638	1.3479	2.98672	1.71397
TCONS_00000172	XLOC_000100	4.98558	7.1657	3.03255	2.88542	1.76581	1.39833	2.38659	1.73803	3.41809	2.30708	3.61298	3.34714
TCONS_00000173	XLOC_000101	0.846062	4.22897	1.67142	0	0	0	1.42942	0.691309	0.60043	0	0	0
TCONS_00000174	XLOC_000102	5.28458	4.38095	3.69213	3.08367	1.1571	1.4167	0.76217	1.1561	1.92091	2.50362	2.13711	2.00808
TCONS_00000175	XLOC_000103	0	0.426587	1.13267	0	0	0	0	0	0	0	0.365758	0
TCONS_00000176	XLOC_000104	155.421	163.803	149.738	150.468	146.779	147.756	151.933	122.961	134.829	135.934	133.552	125.832
TCONS_00000177	XLOC_000105	6.46447	6.9463	0	0	0	0	0	0	0	0.0776814	0.307862	0.239347
TCONS_00000178	XLOC_000105	9.94904	9.58442	0.228174	0.0928469	0	0.113354	0.137589	0.0751707	0.131074	0.101529	0.560037	0.441923
TCONS_00000179	XLOC_000106	1.27229	0.817515	4.57966	5.60315	0.282237	1.86424	1.24877	1.17737	0.41692	1.52218	0.383238	0.729328
TCONS_00000180	XLOC_000106	2.31025	2.40773	15.6402	16.4089	7.5676	6.14169	1.97538	2.99101	2.89879	2.738	2.15645	1.78043
TCONS_00000181	XLOC_000107	8.61282	8.78462	29.0862	30.0174	39.2868	39.3379	32.3447	36.9182	24.7384	25.2862	21.4192	23.2968
TCONS_00000182	XLOC_000108	1005.9	1306.06	1200.12	1088.47	1031.02	1139.14	956.909	844.918	969.919	928.237	794.598	813.931
TCONS_00000183	XLOC_000108	669.437	563.091	545.615	568.694	531.119	465.197	505.891	535.494	425.144	407.847	427.221	430.134
TCONS_00000184	XLOC_000108	0	0	0	0	0	0	0	0	0	0	0	0
TCONS_00000185	XLOC_000108	0.0116275	0.00351573	0.000319081	0.0061905	0.0017774	6.82112	2.48894	5.36027	0.00372527	0.000133678	1.8614	0.000389438
TCONS_00000186	XLOC_000108	669.437	563.091	545.615	568.694	531.119	465.197	505.891	535.494	425.144	407.847	427.221	430.134
TCONS_00000187	XLOC_000109	0	0	0	0	0	0	0	0	0	0	0	0
TCONS_00000188	XLOC_000110	15.1279	11.1083	12.6982	12.9008	5.62048	5.58063	6.69385	6.81621	6.56253	6.29407	6.24236	6.15696
TCONS_00000189	XLOC_000111	5.85552e-05	4.89735e-05	0	0	0	0	0	0	0	0	0	0
TCONS_00000190	XLOC_000111	0.189462	0.0810019	0	0	0	0	0	0	0	0	0	0
TCONS_00000191	XLOC_000111	11.657	1.16056	0	0	0	3.78867e-09	0	0.190032	0	0.683725	1.11488e-07	0
TCONS_00000192	XLOC_000111	0.124055	14.3921	0	0.99945	0	5.90047e-09	0	0.639797	0	0.137009	4.34726e-08	0
TCONS_00000193	XLOC_000111	0.0767209	5.05509	3.71409e-05	3.1546	2.04201	1.4137	5.31004e-10	1.96411	1.10307	0.586397	1.54096	1.9574
TCONS_00000194	XLOC_000111	7.71265	0.390372	3.8945	0	0	0.877096	2.94847	0.580446	2.39347	2.81724	3.8315	5.21705
TCONS_00000195	XLOC_000112	8.82729	5.16857	8.99873	11.9978	9.28957	11.5191	17.0237	19.8638	7.65797	9.8736	6.50447	4.52416
TCONS_00000196	XLOC_000112	0	0	0	0	0	0	0	0	0	0	0	0
TCONS_00000197	XLOC_000112	3.23207	0	5.60665	5.03773	1.62132	4.75761	6.35114	1.42134	2.96187	5.66618	2.77324	4.48463
TCONS_00000198	XLOC_000112	0.159675	0	0.289505	0.323746	0.0972937	0.239235	0.307589	0.0852934	0.180112	0.285552	0.187513	0.206886
TCONS_00000199	XLOC_000112	0	0	0	0	0	0	0	0	0	0	0	0
TCONS_00000200	XLOC_000112	0	0	0	0	0	0	0	0	0	0	0	0
TCONS_00000201	XLOC_000112	0	4.28385	4.95444	1.17328	7.77068	0	5.39585	7.29629	1.633	2.01629	0.168928	0
TCONS_00000202	XLOC_000112	0	0	0	0	0	0	0	0	0	0	0	0
TCONS_00000203	XLOC_000112	0	0	0	0	0	0	0	0	0	0	0	0
TCONS_00000204	XLOC_000112	0	0	0	0	0	0	0	0	0	0	0	0
TCONS_00000205	XLOC_000112	30.848	27.0087	51.9825	41.5422	27.7029	29.2227	46.116	38.2514	43.7408	43.3711	23.4649	24.8727
TCONS_00000206	XLOC_000112	0	0	9.57751	11.4592	40.2622	27.9162	45.3189	20.4271	9.55082	14.7199	7.42166	6.93158
TCONS_00000207	XLOC_000112	0	0	0	0	0	0	0	0	0	0	0	0
TCONS_00000208	XLOC_000112	0	0	0	0	0	0	0	0	0	0	0	0
TCONS_00000209	XLOC_000113	0.167495	0	1.81989	0.801441	0.751823	0.460249	0	0.136577	0	0.361492	0	0
TCONS_00000210	XLOC_000114	1.8748	1.49936	0.37037	0	0	0	0	1.22298	0.2661	0	0.994726	0.507972
TCONS_00000211	XLOC_000115	0.177942	0.178118	0.108366	0	0.120314	0.105697	0.0677205	0	0.123124	0.0476266	0.272412	0
TCONS_00000212	XLOC_000116	0	0	0	0	0	0	0	0	0	0	0	0
TCONS_00000213	XLOC_000116	1.93498	2.44504	2.69602	2.24505	3.47985	3.12258	2.1825	2.91713	2.14902	2.57905	2.68689	2.68394
TCONS_00000214	XLOC_000117	76.3238	66.1822	38.8359	37.5275	36.2405	39.8938	37.7391	41.6726	54.2843	47.4911	55.9881	61.4436
TCONS_00000215	XLOC_000118	13.4853	12.6675	23.9995	23.3906	38.171	41.794	24.281	27.3717	22.4405	22.2047	18.7357	19.47
TCONS_00000216	XLOC_000119	0.259134	0	0	0	0	0	0	0	0	0	0	0.351059
TCONS_00000217	XLOC_000120	2.10098	2.0789	0.15453	0.388599	0.847133	0.65338	1.18019	0.745867	1.2378	0.803518	3.07779	2.41306
TCONS_00000218	XLOC_000121	51.0284	49.6154	0.118519	0.0574123	0.0538579	0	0	0	0.0851519	0.04316	0.039789	0.0907338
TCONS_00000219	XLOC_000122	14.1501	15.4079	18.4343	19.8048	18.4813	18.3612	21.9739	22.9464	19.3501	18.6594	17.7374	13.3595
TCONS_00000220	XLOC_000122	19.795	31.6786	37.3577	29.9989	29.1506	36.9037	27.8155	32.425	21.4051	32.4946	23.3331	23.8688
TCONS_00000221	XLOC_000123	1.64025	1.55592	0	2.76138e-05	4.881	4.76755	16.2867	4.84002	11.1737	9.76489	2.57666	2.5442
TCONS_00000222	XLOC_000123	0	0	2.40499	3.56784	14.2557	6.867	26.2827	25.352	11.8265	17.7075	0.698425	3.56661
TCONS_00000223	XLOC_000123	0.427408	7.94016e-05	2.19031	0.884216	15.435	1.85929	19.2184	17.2266	11.1162	7.48385	1.1817	3.86825
TCONS_00000224	XLOC_000124	0	0	0	0	0	0	0	0	0	0	0	0
TCONS_00000225	XLOC_000125	0	0	0	0	0	0	0	0	0	0	0	0
TCONS_00000226	XLOC_000126	0	0.039097	0	0	0.0350011	0.0449179	0	0	0	0	0	0
TCONS_00000227	XLOC_000126	0	0.00115508	0	0	0.000963633	0	0	0	0	0	0	0
TCONS_00000228	XLOC_000127	13.3221	13.583	3.89036	4.34863	2.96716	4.13383	4.79482	5.67429	7.66635	7.6755	10.5318	10.7339
TCONS_00000229	XLOC_000128	2.36492	4.60365	2.51537	2.12297	3.03001	2.18322	2.02518	4.72535	3.273	5.63137	2.53062	6.50745
TCONS_00000230	XLOC_000128	2.36492	0.00379428	2.51537	2.12297	3.03001	2.18322	2.02518	0.0122313	1.09786	0.000691064	2.53062	0.00305861
TCONS_00000231	XLOC_000128	0	0	0	0	0	0	0	0	0	0	0	0
TCONS_00000232	XLOC_000128	11.6026	14.7931	13.4706	12.9779	12.9627	15.9792	15.9009	14.3843	17.172	16.9286	15.1551	15.3584
TCONS_00000233	XLOC_000129	59.7373	74.2933	0.378068	0.366285	0.128853	0.219113	0.202081	0.0780251	0.577214	0.137678	11.4953	11.5052
TCONS_00000234	XLOC_000129	11.1224	8.17405	0	0	0	0	0	0	0	0	1.72121	1.00453
TCONS_00000235	XLOC_000129	11.1224	8.17405	0	0	0	0	0	0	0	0	1.72121	1.00453
TCONS_00000236	XLOC_000129	0	1.05123	0	0	0	0	0	0	0	0	0	0
TCONS_00000237	XLOC_000129	11.1224	8.17405	0	0	0	0	0	0	0	0	1.72121	1.00453
TCONS_00000238	XLOC_000130	0	3.91134e-06	7.8113e-07	4.11948e-05	2.7195e-05	1.93531e-05	2.86943e-07	0.00041501	8.89623e-10	3.46448e-06	1.02157e-05	0
TCONS_00000239	XLOC_000130	5.75049	11.5767	27.2227	18.6812	36.3686	37.9573	13.8439	20.9765	16.7296	14.0353	13.8737	14.3966
TCONS_00000240	XLOC_000130	1.97944	1.01253	8.66235	6.1028	5.21224	4.39514	1.52633	4.30397	3.16972	2.97499	5.97355	2.30643
TCONS_00000241	XLOC_000130	9.57779	7.09466	63.4269	70.1041	23.4883	48.4461	26.4904	35.3012	21.9912	22.0825	12.2381	7.31396
TCONS_00000242	XLOC_000131	0	0	0.289327	0	8.70737e-10	0.121218	0.144005	0	0.0602967	0.196755	0	0
TCONS_00000243	XLOC_000131	1.64771	1.3621	0.23721	0.241782	0.0853382	0.219964	0.081146	0.206016	0.204513	0.138212	0.0837824	0.150245
TCONS_00000244	XLOC_000132	3.07576	2.99591	9.36046	8.09428	7.39076	7.63333	6.85158	6.8184	5.92495	6.09515	6.45311	4.73198
TCONS_00000245	XLOC_000133	8.15286	6.92773	18.3879	20.7406	15.492	19.3535	14.5203	14.9579	11.2825	12.4637	11.6254	9.02008
TCONS_00000246	XLOC_000134	40.3077	38.9173	44.2382	43.8485	49.3812	45.9657	37.6391	40.0776	38.548	35.7722	41.6608	43.0161
TCONS_00000247	XLOC_000135	8.23957	9.26658	41.3719	41.5061	89.6874	81.8642	93.7714	68.1196	46.1297	49.8086	34.2301	25.8907
TCONS_00000248	XLOC_000135	6.40762	6.82414	26.0392	37.4358	56.1044	47.3546	60.6713	45.5432	37.5813	25.9269	20.6287	22.0038
TCONS_00000249	XLOC_000135	1.66565	0.216955	6.56318	4.95373e-09	0	0	0	0	0	0	0	0
TCONS_00000250	XLOC_000136	0.245631	0.245552	0.41015	0.235063	0	0	0.207496	0	0	0.17671	0.162908	0.499149
TCONS_00000251	XLOC_000137	7.68927	5.7449	1.59898	0.929488	0.726619	0.593093	1.77771	2.83797	1.60835	2.03801	0.697854	0.767565
TCONS_00000252	XLOC_000138	0.086452	2.23352	1.65724	0.80279	0.732846	1.19181	0	0	0.494721	1.27693	0.462338	0.568237
TCONS_00000253	XLOC_000138	4.03074	1.52649e-05	14.6397	7.09185	6.66719	10.1422	3.48424	6.72663	8.05161e-06	2.64938e-06	1.39267e-05	5.01964
TCONS_00000254	XLOC_000138	24.5812	28.3579	42.5869	47.4081	10.5347	12.7747	9.60816	13.3735	18.6339	16.3885	18.4992	11.2264
TCONS_00000255	XLOC_000139	1.66897	1.53323	1.12377	4.58793	3.6099	5.54358	3.58682	3.36784	6.68064	7.67687	35.3064	26.9838
TCONS_00000256	XLOC_000139	0	0	0	0	0	0	0	0.151507	0.0579548	0	0	0.0452796
TCONS_00000257	XLOC_000139	7.47542	6.95072	7.5726	5.17573	9.48924	8.95396	5.08342	5.8009	4.70919	4.59756	2.61403	2.64692
TCONS_00000258	XLOC_000140	2.8086	1.48296	2.30439	5.17465	3.21808	1.32642	3.38584	2.20636	4.60726	3.89507	3.39426	3.09882
TCONS_00000259	XLOC_000140	1.8724	2.96591	3.45659	0	3.21808	5.30568	1.69292	3.0889	1.53575	1.94754	1.93958	1.85929
TCONS_00000260	XLOC_000141	25.2282	28.9552	28.3176	27.966	17.368	21.007	20.749	21.4366	27.6046	23.0666	21.6632	21.8266
TCONS_00000261	XLOC_000142	1.14988	2.21005	3.62702	1.04598	0.738288	0.521053	0.634535	2.61148	2.26274	2.01693	2.59421	2.14814
TCONS_00000262	XLOC_000142	0	0	0.105708	3.61249e-07	2.63352e-06	0.00906379	5.40901e-09	0	2.90393e-10	0.000416171	4.60749e-10	0.25901
TCONS_00000263	XLOC_000142	3.16656	2.36995	2.9256	4.83762	2.81253	3.51549	3.05929	2.48477	2.2006	2.50093	2.18912	1.80324
TCONS_00000264	XLOC_000142	12.083	11.3954	9.82928	8.94506	11.3156	9.81448	9.28265	7.91926	9.1251	9.71566	10.1196	9.43676
TCONS_00000265	XLOC_000142	0	0	2.09456	0	2.77251	0	0	3.50597e-05	0	0.705652	1.08895	0.375534
TCONS_00000266	XLOC_000143	5004.56	5972.08	3752.51	3269.61	2889.19	3154.39	2744.68	3112.65	2511.97	2643.71	2867.88	2650.36
TCONS_00000267	XLOC_000144	4.75933	3.92815	3.22924	2.34999	3.09183	2.89055	3.83619	4.78839	3.85443	1.98856	3.56022	3.62994
TCONS_00000268	XLOC_000144	0.88154	2.41518	3.93836	3.71062	4.40207	4.00428	3.79727	1.72093	0.973076	3.31727	1.06759	1.44959
TCONS_00000269	XLOC_000145	1.40218	1.88492	0.17156	0	0	0	0	0	0	0.0951999	0.0860123	0
TCONS_00000270	XLOC_000145	5.67113	4.7755	2.73226	2.41863	1.29289	2.02467	0.905513	0.849963	1.65544	1.19672	1.41079	1.42157
TCONS_00000271	XLOC_000146	0	0	0	0	0	0	0.517777	0	1.08747	0.220477	0	0
TCONS_00000272	XLOC_000147	0	0	0	0	0	0	0	0	0	0	0	0
TCONS_00000273	XLOC_000148	0.903985	1.77657	3.17912	1.97702	2.82041	3.24748	3.64877	4.54048	4.33783	4.29755	3.28636	3.56643
TCONS_00000274	XLOC_000149	0.964211	1.02977	0	0	0.515228	0.183197	0.861996	0.319258	7.65751e-08	0.596121	0.417156	0.845129
TCONS_00000275	XLOC_000150	8.48114	6.92769	8.40035	8.87331	7.35959	7.90172	12.7509	8.94534	8.80897	8.26403	10.0582	8.90264
TCONS_00000276	XLOC_000151	0	0	0	0	0	0	0	0	0	0	0	0
TCONS_00000277	XLOC_000152	0	0	0.850242	0	0	0	0.727138	0.701887	1.22174	0	0.570886	0
TCONS_00000278	XLOC_000153	1.46878	1.12842	0.0355306	0.187957	0	0.694705	0	0.218815	0	0.0199236	0.58261	0.981948
TCONS_00000279	XLOC_000154	0.0815635	0.0440164	0.0483773	0.117795	0.191052	0.0771588	0	0.101935	0.0936567	0.0900641	0.0629873	0.17661
TCONS_00000280	XLOC_000155	0.185567	0.301887	0.299652	0.403847	0.247423	0.213817	0.24207	0.233403	0.087612	0.134329	0.25036	0.261745
TCONS_00000281	XLOC_000156	0	0	0	0.928729	7.84107	7.1113	21.3151	7.12209	4.13237	6.98176	8.3674	9.86063
TCONS_00000282	XLOC_000157	0.397547	0.794842	0.392682	0.380443	0	0	0.671654	0.648329	0.56426	0.286	0	0
TCONS_00000283	XLOC_000158	2.75841	3.19659	0	0	0.130877	0	0	0.118876	0.206923	0	0.501206	0
TCONS_00000284	XLOC_000159	5.74111	4.43136	2.03821	2.14217	2.92871	2.18379	2.33121	2.15099	1.40773	1.76259	2.22749	1.81484
TCONS_00000285	XLOC_000160	0	0	0.665155	0	0	0.616797	0.56885	0	0	0	0	0
TCONS_00000286	XLOC_000161	35.1484	30.8347	22.5314	19.9071	14.5533	14.9801	17.9361	11.6981	15.8827	13.6235	19.315	16.6173
TCONS_00000287	XLOC_000162	0	0	0	0	0	0	0	0	0	0	0	0
TCONS_00000288	XLOC_000163	1.45515	0	0	2.78509	3.91899	5.33138	8.60464	0	0	3.14056	0.965089	2.95702
TCONS_00000289	XLOC_000164	0	0	0	0	0	0	0	0	0	0	0	0
TCONS_00000290	XLOC_000165	0.779824	0.850443	1.30322	1.31386	1.49206	1.90047	1.78958	2.78458	1.34106	1.21946	1.21113	1.80504
TCONS_00000291	XLOC_000166	1.84073	2.2293	4.74555	5.67883	10.2847	8.91522	7.89821	8.03263	6.05535	5.47639	4.08789	3.13049
TCONS_00000292	XLOC_000166	0	0	0	0	0	0	0	0	0	1.4929	0	7.80619
TCONS_00000293	XLOC_000167	0.231825	0.231751	0	0.0554627	0	0	0	0	0.0411302	0	0.0768758	0.274805
TCONS_00000294	XLOC_000168	0.791914	0.791663	0	0.757843	0	0	0	0	0	0	0	0
TCONS_00000295	XLOC_000169	0	0.143834	0	0	0	0	0	0	0	0	0	0
TCONS_00000296	XLOC_000170	0	0	0	0	0	0	0	0	0	0	0	0
TCONS_00000297	XLOC_000171	0.959001	0.425408	1.43219	1.85151	3.17053	2.42058	4.19447	2.13503	2.87282	2.07444	3.27689	3.47054
TCONS_00000298	XLOC_000172	0	0	0	0	0	0	0	0	0	0	0	0
TCONS_00000299	XLOC_000173	4.28432	4.86397	1.06439	2.02826	2.09863	1.80694	1.16515	1.62242	1.23263	1.7526	1.39678	1.99729
TCONS_00000300	XLOC_000174	0	3.43779	0	0	0	0	0	0	0	0	0	0
TCONS_00000301	XLOC_000175	3.38928	4.32841	5.50861	6.26638	8.44729	5.61408	6.81198	4.04563	7.40866	10.1909	8.00571	4.53719
TCONS_00000302	XLOC_000176	0	0	0	0	0	0	0	0	0	0	0	0
TCONS_00000303	XLOC_000177	0.920831	2.76162	0	0.440606	0	0	0.388935	0.375428	0	0	0.305358	0
TCONS_00000304	XLOC_000178	2.78581	2.41361	0.550344	0.355461	0.666908	0.340222	0.784436	0.605756	0.263603	0.668049	0	0
TCONS_00000305	XLOC_000179	3.46751	3.1217	8.40706	7.27163	9.8321	8.88831	10.1391	8.57247	7.97795	9.07541	9.73388	8.84191
TCONS_00000306	XLOC_000180	0.173361	0	0	0	0	0	0	0.141361	0.12303	0	0	0.11743
TCONS_00000307	XLOC_000181	0.0975264	0.0974955	0	0	0	0	0	0.0795241	0	0.0701616	0.0646817	0
TCONS_00000308	XLOC_000182	0	0	0	0	0.0797	0	0	0	0	0	0	0.0601366
TCONS_00000309	XLOC_000183	0	0	0	0	0	0	0	0	0	0	0	0
TCONS_00000310	XLOC_000184	0.386677	0	0	0	0	0	0	0	0	0	0	0
TCONS_00000311	XLOC_000185	0	0	0	0	0	0	0	0	0	0	0	0
TCONS_00000312	XLOC_000186	0.156877	0.627308	0	0	0	0	0.132521	0	0	0	0	0
TCONS_00000313	XLOC_000187	0.379269	0.126383	0	0	0	0	0	0	0	0	0	0
TCONS_00000314	XLOC_000188	0	0	0	0	0	0	0	0	0	0	0	0
TCONS_00000315	XLOC_000189	0.180144	0	0	0.0861969	0.161721	0	0	0	0	0	0	0
TCONS_00000316	XLOC_000190	0	0	0	0	0	0	0	0	0	0	0	0
TCONS_00000317	XLOC_000191	0.71113	0.710904	0	0	0	0.130272	0	0	0	0	0	0.192679
TCONS_00000318	XLOC_000192	0	0	0	0	0	0	0	0	0	0	0	0
TCONS_00000319	XLOC_000193	0.118046	0.581421	0.574488	0.222633	0.522124	0.653565	0.393048	0.0948496	0.495302	0.669462	0.547932	0.318421
TCONS_00000320	XLOC_000194	0	2.93964	2.90458	2.81405	0	2.69341	4.96808	2.39777	4.1737	2.11548	1.95025	5.97555
TCONS_00000321	XLOC_000195	1.18787	0	0	0.378921	0	0.362676	0	0.322868	0	0.569712	0	0.268209
TCONS_00000322	XLOC_000196	0	0	0	0.615229	0	0	0	0	0	0	0	0.333594
TCONS_00000323	XLOC_000197	0.546902	1.64019	0	0	0	0	0	0	0	0	0.362718	0.740909
TCONS_00000324	XLOC_000198	0.797916	1.51849	0	0.306571	0	0	0	0.0706864	0	0	0.951823	0.433995
TCONS_00000325	XLOC_000199	1.43203	1.96842	6.18847	6.16689	13.0165	5.41063	12.5507	9.63349	2.15959	3.73455	0.949757	1.21252
TCONS_00000326	XLOC_000200	1.5695	5.10696	1.66391	0.365754	5.83478	4.59542	1.69148	1.96986	1.20674	2.16118	1.20061	1.65027
TCONS_00000327	XLOC_000201	3.09762	2.08084	3.89091	3.29347	7.00804	6.67125	6.53317	4.90044	5.71319	6.11997	4.76295	5.58618
TCONS_00000328	XLOC_000202	2.31423	1.33008	1.35368	1.62299	1.49837	2.1914	0.499429	0.796859	0.888556	1.58088	0.646855	1.63271
TCONS_00000329	XLOC_000203	2.17789	3.04696	2.17223	1.68602	2.54361	3.26655	2.15841	0.783288	0.926	1.21582	1.74665	1.32171
TCONS_00000330	XLOC_000204	0	0	0	0	0	0	0	0	0	0.106448	0	0
TCONS_00000331	XLOC_000205	0.182063	0.127109	0.7626	0	0	0.273884	0.169498	0.19656	0.324754	0.526184	0.303857	0.230118
TCONS_00000332	XLOC_000206	8.1021	5.64009	16.5252	11.6983	10.1297	16.9792	4.16763	8.50233	2.77199	1.47594	4.56304	4.51648
TCONS_00000333	XLOC_000207	0	0.492727	0	0	0	0.368574	0.679845	0	0.571141	1.02743	0	0
TCONS_00000334	XLOC_000208	7.81494	10.4166	0	0	0	0	0	0	0	0	0	0
TCONS_00000335	XLOC_000209	0.657299	0.525673	0	0	0.118015	0	0.11105	0.107194	0.0932939	0.189147	0	0.0890469
TCONS_00000336	XLOC_000210	0	0	0	0	0	0	0	0	0	0	0	0
TCONS_00000337	XLOC_000211	0.530936	0.541683	0.809149	1.22967	0.943442	0.841253	0.837043	0.668733	1.05972	0.918612	1.42643	1.23162
TCONS_00000338	XLOC_000212	0.190243	0	0.0947942	0	0	0	0.081372	0.0781439	0.13772	0	0.0632057	0
TCONS_00000339	XLOC_000213	0	1.35558	1.67881	1.25471	1.85456	0	1.93958	2.35931	0.499665	0.492521	1.47474	1.33216
TCONS_00000340	XLOC_000214	0.521744	1.02088	0.234479	0.591099	0.106553	0	0.501324	0.387132	0.103208	0.0853885	0.426419	0.278491
TCONS_00000341	XLOC_000215	0	0	0	0	0.0102144	0	0	0	0	0	0	0
TCONS_00000342	XLOC_000216	3.84054	2.64297	6.38024	4.49519	2.72699	4.18744	2.64713	6.41786	2.66718	3.99747	1.98493	2.24272
TCONS_00000343	XLOC_000217	2.37842	2.68223	0	0	0	1.59841	1.63506	0	0.927397	2.64626	1.02535	1.44646
TCONS_00000344	XLOC_000218	0.802616	1.60472	5.02102	2.30425	3.60266	5.39114	2.26003	3.05416	2.84799	3.65693	3.37132	4.34934
TCONS_00000345	XLOC_000219	2.04048	2.5629	3.15587	3.24516	4.38241	1.98886	3.04594	1.92183	1.58151	3.64186	3.05415	2.82557
TCONS_00000346	XLOC_000220	1.03654	0.518104	0.511926	0.49597	0.930529	0	0	0	0	0	2.53325	0.351059
TCONS_00000347	XLOC_000221	2.17763	1.27562	2.47934	1.94299	2.50804	2.86821	2.44151	2.7304	2.05275	2.69779	2.70865	2.25112
TCONS_00000348	XLOC_000222	0.457876	0	0	0	0	0	0	0	0	0	0	0
TCONS_00000349	XLOC_000223	2.45734	18.7206	0	0	0	0	0	0	0	0	0	0.299105
TCONS_00000350	XLOC_000224	4.39715	0	0	0.56926	0.419228	0	1.81839	1.28572	0.765642	2.89147	0.714147	3.49879
TCONS_00000351	XLOC_000225	0.39006	0.118741	1.03921	0.455385	0	0.203294	0.187491	0.209446	1.13269	0.716435	0	0.300683
TCONS_00000352	XLOC_000226	0.994922	0.869295	0	0	0	0	0	0	0.153599	0	0.247276	0.42557
TCONS_00000353	XLOC_000227	0	0	0	0	0	0	0	0	0	0	0	0
TCONS_00000354	XLOC_000228	1.09988	0	0	0	0	1.00743	0.99206	0	0	0.791263	0	0
TCONS_00000355	XLOC_000229	2.02992	0.474574	0.703437	0.340757	0.31966	1.63074	0.387274	0	0.505398	0	0.236158	0.723586
TCONS_00000356	XLOC_000230	2.05277	1.82411	1.68971	1.41877	2.96901	2.29806	3.8535	2.23181	3.56108	3.9381	2.26908	2.47197
TCONS_00000357	XLOC_000231	0	0	2.79365	0.902194	0	0	0.79639	0.768733	0	0	0.625256	0.638593
TCONS_00000358	XLOC_000232	0.543897	0.543725	0	0.520496	0	0	0	0.4435	0	0.391286	0	0
TCONS_00000359	XLOC_000233	0	0	0	0	0	0	0	0	0	0	0	0
TCONS_00000360	XLOC_000234	1.19262	1.19224	1.17802	1.14131	0	0	2.01492	0.972475	1.69275	0	1.58194	0.807843
TCONS_00000361	XLOC_000235	0.438977	0.438838	0.216802	0.42009	0.197041	0.60312	0.556237	0	0.467297	0	0.873418	0.743374
TCONS_00000362	XLOC_000236	1.13906	0.839112	5.46376	5.50269	8.93587	8.8127	13.5151	10.0975	7.26666	8.64537	4.23369	4.5795
TCONS_00000363	XLOC_000237	0	0	0	0	0	0	0	0	0	0	0	0
TCONS_00000364	XLOC_000238	0	0	0	0	0	0	0	0	0	0	0	0
TCONS_00000365	XLOC_000239	1.44372	1.88248	1.66027	2.00506	2.22027	2.34862	2.91355	2.58777	2.34499	2.34538	3.0251	2.63943
TCONS_00000366	XLOC_000240	3.29964	3.2986	1.14319	5.20334	1.48109	4.53346	3.74395	3.15139	4.90681	8.73184	1.0942	1.67631
TCONS_00000367	XLOC_000241	7.19922	6.1174	25.2445	30.3137	24.5592	28.6844	16.4201	17.024	12.7728	14.7607	9.0719	6.82714
TCONS_00000368	XLOC_000242	0.28122	0	0	0	0	0	0	0.22931	0	0	0	0
TCONS_00000369	XLOC_000243	0	0	0	0	0	0	0	0	0	0	0	0
TCONS_00000370	XLOC_000244	11.4239	12.5204	12.8473	12.7778	8.69655	8.53151	7.29846	6.41077	11.0729	10.678	12.7817	11.0934
TCONS_00000371	XLOC_000245	0	0	0	5.62811	0	0	2.48404	2.39777	2.08685	6.34643	3.9005	0
TCONS_00000372	XLOC_000246	9.56416	8.19841	4.20188	2.73721	1.80285	2.43836	2.39178	3.37236	1.21018	2.52082	1.08507	0.788841
TCONS_00000373	XLOC_000247	112.132	69.9998	95.3799	85.9829	162.937	119.145	93.9624	108.086	57.7314	52.5242	55.916	45.9008
TCONS_00000374	XLOC_000248	0.315811	0.35079	0.311946	0.201482	0.126006	0.0964223	0.0889269	0	0.0747079	0.100977	0.139635	0.0713069
TCONS_00000375	XLOC_000249	2.15194	2.08186	0.137136	0.166077	0.373908	0.317914	0.322521	0.254717	0.418743	0.499397	0.644549	0.822872
TCONS_00000376	XLOC_000250	3.76688	4.0221	20.0624	19.7746	15.7959	15.1146	12.8327	11.5592	9.90853	9.8127	8.96874	6.78894
TCONS_00000377	XLOC_000251	0.880963	0.623295	2.60355	2.52493	0.467374	1.20844	0.247399	0.597019	0.208531	0.105346	2.09875	0.892708
TCONS_00000378	XLOC_000252	0	0.302725	0.60365	0.387309	0.363508	0.201958	0.363434	0.36908	0	0.163316	0.28908	0.191083
TCONS_00000379	XLOC_000253	1.5599	0.926709	1.98126	1.73665	0.905921	1.33657	0.773856	1.23516	1.37708	0.860488	0.962543	1.10071
TCONS_00000380	XLOC_000254	1.22205	2.44333	4.82839	1.16948	0	3.35801	5.16163	3.98591	3.46905	3.51663	0	3.31113
TCONS_00000381	XLOC_000255	0	0	0	0	0	0	0	0	0	0	0	0
TCONS_00000382	XLOC_000256	0	0	0	0	0	0	0	0	0	0	0	0
TCONS_00000383	XLOC_000257	0	0	0	0	0	0	0	0	0	0	0	0
TCONS_00000384	XLOC_000258	0.537985	0.179272	0	0	0	0.164256	0	0	0.127265	0	0	0
TCONS_00000385	XLOC_000259	96.2903	83.3286	23.3062	25.6582	16.3413	15.5305	10.394	13.832	22.1836	20.961	41.3945	35.7931
TCONS_00000386	XLOC_000260	0.151824	0	0	0	0	0.151628	0	0	0.130658	0	0	0
TCONS_00000387	XLOC_000261	0.444158	0	1.79597	1.93353	0.612865	0.565389	1.18436	1.20339	0.235699	0.281904	0.904115	0.750911
TCONS_00000388	XLOC_000262	0	0.123852	2.08038	1.89698	18.2895	16.1081	9.05305	7.11229	3.82945	3.08728	1.93898	1.09096
TCONS_00000389	XLOC_000263	0.252782	0.252701	0.944267	1.29864	7.6408	7.10369	4.23692	3.14935	1.60726	1.44177	0.838434	0.563946
TCONS_00000390	XLOC_000264	2.20624	0.87481	1.09371	1.29929	3.91286	4.63383	1.54462	1.20544	0.452989	0.60178	0.259259	0.189896
TCONS_00000391	XLOC_000265	34.5391	31.3092	8.0277	12.4699	6.05783	7.92089	5.66394	7.23509	7.16641	6.44031	18.0893	17.6705
TCONS_00000392	XLOC_000266	0	0	0	0	0	0.592609	0	0	0	0	0	0
TCONS_00000393	XLOC_000267	0	0	0	0	0.543557	0	0.281953	0	1.85789	1.32293	0.221946	0
TCONS_00000394	XLOC_000267	2.89759	6.34408e-08	1.37684	0	1.77045	3.38738	9.62849	0	2.77228	0	0	0.499014
TCONS_00000395	XLOC_000267	6.63295	12.1438	16.5382	16.192	36.3194	27.6651	44.0968	42.2747	22.5638	28.3619	18.0594	20.6094
TCONS_00000396	XLOC_000268	0.28492	0.12207	0	0	0.0365401	0	0	0	0	0.117128	0.0809851	0.0551417
TCONS_00000397	XLOC_000268	0	0	0	0	0	0	0	0	0	0	0	0
TCONS_00000398	XLOC_000269	4.6873	3.12108	14.9499	10.8542	17.042	22.5346	14.2871	15.8393	16.7412	15.8742	17.2478	14.6358
TCONS_00000399	XLOC_000269	2.52764	6.2997	0.335847	3.76466	4.86195	2.45779	0.568202	1.20275	0.431532	1.51215	2.82087	1.97764
TCONS_00000400	XLOC_000269	1.61571	1.89606	3.6962e-09	3.31402e-08	0.582901	0	5.65282e-09	4.86008e-07	5.53524e-09	2.71247e-09	3.16608e-08	0
TCONS_00000401	XLOC_000269	13.104	12.5531	2.76284	4.67987	0.620781	1.04755	1.74004	1.53259	0.713094	0.91261	3.54304	7.06041
TCONS_00000402	XLOC_000270	38.6317	42.1811	36.6753	34.9306	50.7041	49.3657	49.7772	43.52	40.9256	41.4368	38.9186	37.501
TCONS_00000403	XLOC_000271	0	0	0	0	0	0	0	0	0	0	0	0
TCONS_00000404	XLOC_000272	0.000120987	2.09469	2.66329	2.21348	0.000225871	2.072	0	0	0.000142606	0	1.25053	7.09753e-05
TCONS_00000405	XLOC_000272	2.68725	1.66471e-06	0.000205591	0.238472	2.62655	0.212513	0	0	1.58673	8.05591e-09	0.0239972	1.98006
TCONS_00000406	XLOC_000272	11.2785	8.52243	0.0191128	0.140108	0.0553665	0.0584113	0.0131299	0.0228124	0.149133	0.0276677	3.29076	2.71499
TCONS_00000407	XLOC_000272	0	0	0	0	0	0	0	0	0	0.544734	0	0
TCONS_00000408	XLOC_000272	0.000311441	0.00541345	0.00994079	0.250571	0.327374	0.268195	0.00448035	0.00901951	1.30606	0.0700416	0.0230329	0.189638
TCONS_00000409	XLOC_000272	0.000311441	0.00541345	0.00994079	0.250571	0.327374	0.268195	0.00448035	0.00901951	1.30606	0.0700416	0.0230329	0.189638
TCONS_00000410	XLOC_000272	0	0.393538	0.373639	0.332567	0.713971	0.848743	0	0	8.68259e-08	0.380799	0.747244	0
TCONS_00000411	XLOC_000272	0	0.393538	0.373639	0.332567	0.713971	0.848743	0	0	8.68259e-08	0.380799	0.747244	0
TCONS_00000412	XLOC_000272	0.0467765	0.0151753	0.0541366	0.367491	0.148759	0.166997	0.038037	0.0612925	0.398829	0.07904	2.07755	2.19574
TCONS_00000413	XLOC_000272	0.0467765	0.0151753	0.0541366	0.367491	0.148759	0.166997	0.038037	0.0612925	0.398829	0.07904	2.07755	2.19574
TCONS_00000414	XLOC_000272	1.14499	1.19901	5.92366	4.79312	12.8287	5.56578	4.60684	5.28576	4.4523	8.9882	3.40648	5.98964
TCONS_00000415	XLOC_000272	0	0	0	0	0.399528	0	0.96458	0.311069	0.425075	0	0.353205	0
TCONS_00000416	XLOC_000272	1.22593	1.63944	1.73935	0.0367082	0.0457147	3.58419	0.000538487	0.00125949	0.184079	0.00865582	2.19716	2.19523
TCONS_00000417	XLOC_000272	1.22593	1.63944	1.73935	0.0367082	0.0457147	3.58419	0.000538487	0.00125949	0.184079	0.00865582	2.19716	2.19523
TCONS_00000418	XLOC_000272	0.000893208	0.0142252	0.028072	0.655389	0.877072	0.764431	0.0129394	0.0241643	0.129536	0.199483	0.0591813	0.557088
TCONS_00000419	XLOC_000272	0.394673	0	0	0.132444	0.00673109	0	0	0.869201	0.338505	0.0695429	0.278502	1.64835
TCONS_00000420	XLOC_000272	0.00434493	3.51385	4.0199	5.81016	3.676	4.7078	6.19185	5.40166	0.564896	0.960271	0.00568004	0.753541
TCONS_00000421	XLOC_000273	0.328868	0.821909	0.162422	0.403331	0.147617	0	0	0.402244	0.23339	0.236591	0.327169	0.556913
TCONS_00000422	XLOC_000274	4.46659	1.86713	1.84486	4.68786	0	1.71074	1.57775	1.52296	2.55678	2.68731	1.23872	3.35547
TCONS_00000423	XLOC_000274	0	3.32438	1.70436	0.000351147	3.37768	2.36369	2.79381	1.50953	0	0.633532	2.76874	0.000199303
TCONS_00000424	XLOC_000275	0.0941858	0	0	0	0	0	0.0795632	0	0	0	0.0624662	0.0637986
TCONS_00000425	XLOC_000276	0.000563242	0.00128233	0.000350578	0.000809657	0.00061604	0.000452518	0.000329606	0.000403796	0.000662241	0.000348296	0.000766375	0.000338837
TCONS_00000426	XLOC_000276	9.52173	9.66007	5.13658	5.84308	5.54949	7.22443	5.94258	3.63752	5.71506	5.52091	4.69171	7.15015
TCONS_00000427	XLOC_000276	0	0	0	0	0	0	0	0	0.083831	0	0	0
TCONS_00000428	XLOC_000277	0	0	0	0	0	0	0	0	0	0	0	0
TCONS_00000429	XLOC_000278	0	0.21342	0.622611	0.136202	0	0	0.273101	0.0397757	0.548331	0.445519	0	0.0812454
TCONS_00000430	XLOC_000279	113.629	137.461	192.113	171.069	188.683	216.616	228.338	180.05	184.283	205.869	269.312	229.939
TCONS_00000431	XLOC_000279	495.766	528.362	565.088	617.888	473.377	613.446	605.237	657.309	559.153	757.015	1029.6	1210.65
TCONS_00000432	XLOC_000280	0.550872	1.70222	4.50372	4.52008	3.81708	4.18914	2.43203	4.88387	6.36356	4.25793	2.80049	7.31717
TCONS_00000433	XLOC_000280	4.74661	6.13324	0.962958	0.905479	6.81516	4.5897	10.4384	11.7766	10.7698	14.732	19.1672	19.4583
TCONS_00000434	XLOC_000280	3.31657	3.6829	1.15058	0.383213	0.586577	0.688934	0.272338	0.804541	1.09035	0.824963	1.79375	1.22235
TCONS_00000435	XLOC_000281	3.97959	3.73509	2.9692	3.03086	3.29715	3.16557	2.89762	3.26792	3.88438	3.5376	3.86195	3.61972
TCONS_00000436	XLOC_000281	3.97959	3.73509	2.9692	3.03086	3.29715	3.16557	2.89762	3.26792	3.88438	3.5376	3.86195	3.61972
TCONS_00000437	XLOC_000281	3.97959	3.73509	2.9692	3.03086	3.29715	3.16557	2.89762	3.26792	3.88438	3.5376	3.86195	3.61972
TCONS_00000438	XLOC_000281	3.97959	3.73509	2.9692	3.03086	3.29715	3.16557	2.89762	3.26792	3.88438	3.5376	3.86195	3.61972
TCONS_00000439	XLOC_000281	0	0	0	0	0	0.285123	0	0.253827	0	0	0	0
TCONS_00000440	XLOC_000281	2.8348	1.54671	0.775527	0	0	0	0.548521	0.442834	1.2955	0.54551	0	0
TCONS_00000441	XLOC_000282	5.52013	5.37716	7.36833	7.0673	9.17451	8.5569	10.0194	9.06318	8.02725	9.33778	7.09996	7.52886
TCONS_00000442	XLOC_000282	0	0.553613	0	0	0	0.490385	0	0	1.34935	0	0.42362	0
TCONS_00000443	XLOC_000283	0	0	1.75206	1.94287	3.6068	0.802555	5.77692	0	2.36594	0	1.45481e-05	0
TCONS_00000444	XLOC_000283	2.22256	3.93097	1.75206	5.82862	3.6068	4.01277	0	5.15808	4.73189	2.3984	3.00478	5.73245
TCONS_00000445	XLOC_000283	0	0	1.75206	0	0	0.802555	0	0	0	0	1.45481e-05	0
TCONS_00000446	XLOC_000283	2.22256	0	1.75206	0	0	4.01277	0	7.94645e-08	0	2.3984	3.00478	0
TCONS_00000447	XLOC_000284	34.8331	35.5011	26.7649	29.2895	28.3909	29.1745	36.3749	38.5583	43.0929	44.933	51.5354	52.1234
TCONS_00000448	XLOC_000285	29.234	28.2797	25.159	25.3012	10.203	11.1957	14.4365	17.63	15.443	15.7426	16.5591	15.0424
TCONS_00000449	XLOC_000286	1.02051	0	0	1.9532	0	0	0	0	0	1.46833	0	0
TCONS_00000450	XLOC_000286	1.12719	2.92775	2.69998	0.84947	1.22694	0.894173	0.329866	2.38808	2.77122	1.20044	3.62575	3.04182
TCONS_00000451	XLOC_000287	4.48677	4.90584	4.84734	4.69626	0.755231	2.4401	2.01354	2.85825	2.78613	4.74087	6.32342	4.36885
TCONS_00000452	XLOC_000288	1.57826	1.57482	1.34957	1.46565	0.426936	0.565106	0.578865	0.805601	1.18088	1.29358	2.13937	1.58077
TCONS_00000453	XLOC_000288	1.57826	1.57482	1.34957	1.46565	0.426936	0.565106	0.578865	0.805601	1.18088	1.29358	2.13937	1.58077
TCONS_00000454	XLOC_000288	1.57826	1.57482	1.34957	1.46565	0.426936	0.565106	0.578865	0.805601	1.18088	1.29358	2.13937	1.58077
TCONS_00000455	XLOC_000288	1.57826	1.57482	1.34957	1.46565	0.426936	0.565106	0.578865	0.805601	1.18088	1.29358	2.13937	1.58077
TCONS_00000456	XLOC_000288	1.57826	1.57482	1.34957	1.46565	0.426936	0.565106	0.578865	0.805601	1.18088	1.29358	2.13937	1.58077
TCONS_00000457	XLOC_000288	1.57826	1.57482	1.34957	1.46565	0.426936	0.565106	0.578865	0.805601	1.18088	1.29358	2.13937	1.58077
TCONS_00000458	XLOC_000289	0	0	0	0	0	0.153244	1.29444	1.40971	8.69973	4.85049	2.64234	3.89092
TCONS_00000459	XLOC_000289	0.0340872	0.102229	0.0673401	0.195724	0.0918032	0	0.216632	0	0.367357	0.615573	0.374387	0
TCONS_00000460	XLOC_000289	0.0340872	0.102229	0.0673401	0.195724	0.0918032	0	0.216632	0	0.367357	0.615573	0.374387	0
TCONS_00000461	XLOC_000290	4.29982	5.04601	16.0655	15.3859	5.11879	5.22268	5.52735	6.63114	5.97028	5.24522	7.62529	5.88845
TCONS_00000462	XLOC_000291	8.959	6.39542	1.88359	1.72526	6.96878	3.85847	16.0851	9.0011	6.64489	8.22507	14.9764	28.0344
TCONS_00000463	XLOC_000292	0	0	0	0	0.12605	0	0	0	0	0	0.0931233	0
TCONS_00000464	XLOC_000293	0	0	0	0	0	0	0	0	0	0	0	0
TCONS_00000465	XLOC_000293	0	0	0	0.0603763	0	0	0	0.0514449	0	0	0	0.0427357
TCONS_00000466	XLOC_000294	1.2938	1.00349	0.905097	0.777223	1.70468	1.12763	1.37624	1.54446	1.82523	1.90265	1.8986	2.00611
TCONS_00000467	XLOC_000295	0.196407	0.0654483	0	0	0	0	0	0	0	0	0	0
TCONS_00000468	XLOC_000295	0.184321	0.695766	0	0	0	0	0	0	0	0	0	0
TCONS_00000469	XLOC_000295	0	0	0	0	0	0	0	0	0	0	0	0
TCONS_00000470	XLOC_000296	2.08743	2.63939	2.33182	0.475904	0.585054	2.61566	2.19257	1.20165	3.09792	3.06147	3.21463	2.08219
TCONS_00000471	XLOC_000296	1.98813	1.73688	1.88018	3.01366	1.9097	1.34113	2.1465	2.01298	1.89236	1.16869	2.09339	1.65287
TCONS_00000472	XLOC_000296	1.54322	1.86764	1.31206	1.52192	0.273329	0.955295	0.772404	1.11431	0.996497	1.41339	1.09943	1.31251
TCONS_00000473	XLOC_000297	13.9519	14.7389	38.8643	35.1799	62.9632	61.0821	41.4538	33.0923	21.7977	23.5669	19.3059	18.0529
TCONS_00000474	XLOC_000298	79.1468	70.6524	70.9109	68.0608	57.8426	47.3766	67.6124	64.3555	65.3454	72.6575	66.2434	71.4318
TCONS_00000475	XLOC_000299	18.0035	28.1149	2.34829	2.26242	1.65588	1.83966	1.66203	1.93855	1.97806	2.06417	2.62722	1.88802
TCONS_00000476	XLOC_000300	72.4128	68.1575	50.4889	57.1968	50.7766	59.7823	66.1047	61.9947	56.9917	55.8223	76.9813	70.345
TCONS_00000477	XLOC_000301	10.1562	9.07001	8.96185	6.99786	4.25485	2.85279	5.14766	6.6252	14.7036	14.9053	19.3992	17.7033
TCONS_00000478	XLOC_000302	5.47687	4.6717	5.01755	4.57956	1.46028	2.70258	2.65957	2.15688	7.35752	5.99426	10.7775	8.31284
TCONS_00000479	XLOC_000302	0	0	0	0	0	0	0	0	0	0	0	0
TCONS_00000480	XLOC_000303	2.78086	2.74387	2.26421	2.61539	7.66251	6.99548	4.50428	5.12434	6.27617	6.6722	7.04598	7.11364
TCONS_00000481	XLOC_000304	1.30895	0.963167	0.456598	0	0	0	0	0	0.347951	0	0.691036	0.726782
TCONS_00000482	XLOC_000304	0	0	0	0.414317	0	0.605647	0	0.527002	5.96644e-09	0.547177	0.198916	0
TCONS_00000483	XLOC_000304	0.661496	0.610424	0.200271	0	0	0	0	0	0.167344	0	0	0.132749
TCONS_00000484	XLOC_000304	1.11471	0.540682	0	0	0.396036	8.15589e-07	0.70743	0.00384621	0	0	0	0
TCONS_00000485	XLOC_000305	0.242028	0.403251	0.318754	0.15441	0	0.369475	0	0.065784	0.171761	0.116078	0.160518	0.109295
TCONS_00000486	XLOC_000305	7.22404	7.96858	2.12078	2.26343	3.13463	3.73885	1.15108	1.8555	0.37219	0.455758	0.72438	0.736791
TCONS_00000487	XLOC_000306	0.338838	0.4839	0.478131	0.463228	0.347639	0.354695	0.163562	0.197352	0.309169	0.243764	0.417346	0.131154
TCONS_00000488	XLOC_000306	3.09905e-07	1.40402e-06	5.36442e-07	1.42901e-06	7.81307e-07	3.52037e-07	1.36453e-07	4.43541e-07	7.38773e-07	2.44421e-07	1.6285e-06	8.73915e-08
TCONS_00000489	XLOC_000307	16.7704	17.3599	0.392157	0.295505	0.27721	0	0	0	0	0.0317353	1.37506	0.349231
TCONS_00000490	XLOC_000307	7.46901	8.45587	0	0	0	0.265114	0.244506	0.354022	0.13694	0	0	1.02318
TCONS_00000491	XLOC_000308	17.2828	27.9581	33.3847	30.2277	19.272	28.7685	36.7289	21.4498	19.802	28.181	17.1133	27.369
TCONS_00000492	XLOC_000309	0.131754	0.161952	0.250811	0.288083	0.16128	0.11714	0.41077	0.525242	0.492403	0.136791	0.802513	0.491421
TCONS_00000493	XLOC_000309	0.131754	0.161952	0.250811	0.288083	0.16128	0.11714	0.41077	0.525242	0.492403	0.136791	0.802513	0.491421
TCONS_00000494	XLOC_000309	1.65644	1.82135	3.3784	3.49034	2.96182	3.12747	6.88162	6.43228	5.76561	2.39604	5.9668	5.71927
TCONS_00000495	XLOC_000309	0.368437	0.415821	0.690851	0.736324	0.421991	0.325596	0.224489	0.316926	0.321965	0.37993	0.683635	0.347415
TCONS_00000496	XLOC_000309	3.25321	0	0.000293523	4.0091	1.72088	1.46489	0.0221932	2.971	0.301233	1.19369	2.64903	4.47212
TCONS_00000497	XLOC_000309	4.63207	4.67642	9.30568	8.9211	7.74964	8.69295	3.77431	3.89269	3.78017	6.65489	5.0919	4.05305
TCONS_00000498	XLOC_000309	3.34581	3.14407	2.32863	2.3101	3.32268	2.91867	2.06856	2.49542	2.51056	3.4002	2.69667	3.31749
TCONS_00000499	XLOC_000309	3.34581	3.14407	2.32863	2.3101	3.32268	2.91867	2.06856	2.49542	2.51056	3.4002	2.69667	3.31749
TCONS_00000500	XLOC_000309	0.0631712	0	3.14188e-06	0.00885288	0.0194948	0.0865549	0.000214043	0.0321055	0.000588136	0.00153355	0.0731733	0.00471826
TCONS_00000501	XLOC_000310	0.00819893	0.00977513	0.0110106	0.950452	0.00937661	0.000565715	0	0.00672365	0	0	0.402667	0
TCONS_00000502	XLOC_000310	0	0	0	0	0	0	0	0.432675	0	0	0	0.282587
TCONS_00000503	XLOC_000310	1.05313	0.839007	1.31688	0	0.87988	0.0706199	0	0.630933	0	0	0	0
TCONS_00000504	XLOC_000310	0	0	0	0.502099	0	0.965695	0.728113	0.859252	1.17633	1.81255	2.08383	2.26594
TCONS_00000505	XLOC_000311	10.8532	13.3666	12.6212	13.5176	18.8676	15.4468	22.8872	21.3136	19.9282	23.2398	16.7847	18.8636
TCONS_00000506	XLOC_000312	16.3054	17.2381	15.9427	16.638	20.0482	17.6909	32.2093	27.3829	24.1339	28.6004	21.0327	23.3774
TCONS_00000507	XLOC_000313	2.97519	3.74535	5.51474	4.37754	5.01208	5.04652	4.80937	4.6124	4.06644	5.04708	3.58101	2.93587
TCONS_00000508	XLOC_000314	10.9988	14.2484	7.2428	8.77133	12.0941	10.0147	8.51695	14.9444	23.971	17.1432	25.5313	22.9716
TCONS_00000509	XLOC_000314	3.14252	0	0.599029	0.488029	0	0	5.73424	0.228785	0	0.34815	6.88331	8.45389
TCONS_00000510	XLOC_000315	2.382	1.22302	1.85214	1.72835	0.993032	1.80888	2.73754	1.74069	1.16725	2.14676	2.27079	1.43689
TCONS_00000511	XLOC_000316	4.30388	4.89597	25.0675	22.0149	21.116	22.3844	6.12524	9.56248	4.42356	5.06187	1.32879	0.816883
TCONS_00000512	XLOC_000316	0.752545	0.158856	0.481541	4.40989	2.10761	0	0	1.3735	0.683046	0	0.0900168	0.467277
TCONS_00000513	XLOC_000317	3.34771	2.96831	1.21467	1.1441	1.1346	1.26807	1.09648	1.11411	0.932681	0.663484	0.747589	0.849904
TCONS_00000514	XLOC_000318	58.3186	53.5537	26.9	29.2335	29.0321	29.129	34.2051	38.3497	40.8787	41.7617	49.6697	44.6611
TCONS_00000515	XLOC_000319	334.537	389.13	315.507	312.386	267.716	274.292	214.122	253.083	230.996	208.371	233.142	269.054
TCONS_00000516	XLOC_000320	0	0	0.997043	1.24304	0	0	0	1.34532	0	0	2.18848	0.851414
TCONS_00000517	XLOC_000321	0.538021	0.571354	2.15229	3.87387	1.65421	2.57376	5.40797e-09	1.53472	1.32196	1.75767	0.819898	0.20503
TCONS_00000518	XLOC_000321	0	0	2.96296	1.64035	1.9235	1.57003	3.26694	2.79539	1.82468	0.924857	1.42104	2.03178
TCONS_00000519	XLOC_000321	0	0	0	0	0	0	0	0	0	0	0	0
TCONS_00000520	XLOC_000321	7.89277e-10	0.000332668	0	3.31538	1.20432	0.0354391	0.914041	1.82808	0.000816454	1.10813	2.8137	1.69691e-09
TCONS_00000521	XLOC_000321	5.18098	3.67638	35.5871	36.7683	24.3381	23.2936	19.4983	22.7157	13.3264	12.5558	12.914	13.3805
TCONS_00000522	XLOC_000321	0.0786812	0.232988	0.0744869	0.0750682	0.305818	0.154681	0.268257	0.748571	0.883513	0.445085	0	0.193196
TCONS_00000523	XLOC_000321	0	0	0	0	0	0	0	0	0	0	0	0
TCONS_00000524	XLOC_000321	0	0	0	0	0	0	0	0	0	0	0	0
TCONS_00000525	XLOC_000321	0.862813	1.01391	1.53829	0.965848	2.62027	2.20023	3.82288	5.4847	4.08478	4.34268	0.550047	1.19044
TCONS_00000526	XLOC_000321	0.125258	1.51114	3.93109	1.89381	4.03374	4.7275	4.56609	4.00455	3.25514	3.15553	2.24779	1.38622
TCONS_00000527	XLOC_000321	6.36665e-10	0.396927	4.3321	1.83455	1.97624	4.509	3.31779	3.35887	3.1926	2.93181	0.401063	1.37754
TCONS_00000528	XLOC_000321	1.26849	1.67668	1.83913	1.20916	3.84335	3.5581	9.02022	12.0501	10.482	10.9499	1.14777	1.38849
TCONS_00000529	XLOC_000322	1.34297	1.56224	5.52322	4.48649	3.6388	3.66792	4.26974	4.08164	5.68379	5.30504	4.25912	4.34996
TCONS_00000530	XLOC_000323	0	0	0	0	0	0	0	0	0	0	0	0
TCONS_00000531	XLOC_000324	0.379108	0.329311	0.271153	0.210162	0.113445	0.308661	0.185515	0.402914	0.350667	0.290248	0.139685	0.409082
TCONS_00000532	XLOC_000325	3.56955	3.26222	1.64811	1.37861	4.4213	0	8.84771e-10	5.1728	5.53455e-06	1.39718	3.97228	1.79755
TCONS_00000533	XLOC_000325	2.4914	2.41947	2.32678	2.42286	1.89431	2.64944	2.0996	2.44692	2.78392	3.23627	1.82925	3.35339
TCONS_00000534	XLOC_000325	9.40807	8.99617	10.5051	11.352	7.71147	10.0986	10.9342	7.00437	14.4281	11.4766	11.9367	13.2996
TCONS_00000535	XLOC_000326	1.9738	1.52383	1.93694	1.88473	1.14439	4.06882	1.9976	2.24663	2.16717	2.2357	2.91377	2.88173
TCONS_00000536	XLOC_000326	1.9738	1.52383	1.93694	1.88473	1.14439	4.06882	1.9976	2.24663	2.16717	2.2357	2.91377	2.88173
TCONS_00000537	XLOC_000326	3.7531	3.97762	5.31884	5.28357	8.80185	6.77284	6.31714	5.84553	5.68948	5.54904	4.58426	5.66021
TCONS_00000538	XLOC_000326	1.69605	1.92005	2.43183	2.55939	4.18723	3.07501	2.8398	2.78084	2.7161	2.52085	2.25065	2.51202
TCONS_00000539	XLOC_000326	1.39069	1.60053	1.99984	2.13535	3.47771	2.52433	2.32547	2.30964	2.25784	2.06972	1.88406	2.05047
TCONS_00000540	XLOC_000326	1.39069	1.60053	1.99984	2.13535	3.47771	2.52433	2.32547	2.30964	2.25784	2.06972	1.88406	2.05047
TCONS_00000541	XLOC_000326	0	0	0	0	0	0	0	0	0	0	0	0
TCONS_00000542	XLOC_000327	7332.35	7268.62	20.3103	15.9972	26.6908	15.5887	13.0859	29.0719	21.5434	5.59717	5.80501	6.16411
TCONS_00000543	XLOC_000328	0	0	0	0	0	0	0	0	0	0	0	0
TCONS_00000544	XLOC_000328	3.4082e-09	8.14006e-05	0.0363362	5.6424e-07	0.00867202	4.29691e-05	0.0057649	1.74286e-07	6.48162e-06	0.000261274	0	0
TCONS_00000545	XLOC_000328	0	0	0	0	0	0	0	0	0	0	0	0
TCONS_00000546	XLOC_000328	0	4.67732e-09	0	0	0	0	0	4.44867e-09	3.10298e-09	0	5.57646e-09	0
TCONS_00000547	XLOC_000328	0	0	0	0	0	0	0	0	0	0	0	0
TCONS_00000548	XLOC_000328	22.4303	23.1003	10.4527	11.1029	8.50301	9.12182	0.414396	10.7999	9.27124	9.7019	11.273	0.392131
TCONS_00000549	XLOC_000328	0	1.07003e-09	0	0	0	0	0	0	0	0	2.85297e-09	0
TCONS_00000550	XLOC_000328	0	8.65368e-07	1.60628e-07	5.90034e-10	7.16345e-08	0	2.09756e-06	0	0	1.04389e-09	0	0
TCONS_00000551	XLOC_000328	0	0	0	0	0	0	0	0	0	0	0	0
TCONS_00000552	XLOC_000328	0	0	0	0	0	0	0	0	0	0	0	0
TCONS_00000553	XLOC_000328	9.7745	10.7852	4.61092	5.2028	3.90982	3.99448	18.2533	4.96596	4.2787	4.2511	5.35717	15.0723
TCONS_00000554	XLOC_000328	0	0	0	0	0	0	0	0	0	0	0	0
TCONS_00000555	XLOC_000329	0.296484	0	0	0	0	0	0	0	0	0	0	0
TCONS_00000556	XLOC_000329	9.87324	10.5349	34.6924	38.8756	31.0244	35.2848	16.8196	15.1257	14.5657	13.8585	15.6105	13.7513
TCONS_00000557	XLOC_000330	4.02176	2.14725	0.78405	2.00782	0.598099	0.940638	0.587602	0.211301	0.358683	0.353263	1.43946	1.26086
TCONS_00000558	XLOC_000330	0	0.692013	0.683761	0	0.621437	0	0	0.564455	0.491261	0.498	0	0
TCONS_00000559	XLOC_000331	83.8149	75.1369	40.5163	45.6067	38.5261	30.8384	36.8533	40.1168	53.7604	44.4341	48.1185	54.7661
TCONS_00000560	XLOC_000332	13.814	10.2865	5.09919	6.43475	10.2449	9.8379	10.718	8.10077	16.5144	11.704	9.88513	13.0749
TCONS_00000561	XLOC_000333	44.6518	51.0275	14.6002	19.6077	72.4617	45.7471	174.053	78.8798	58.2638	66.5503	34.5098	40.0844
TCONS_00000562	XLOC_000333	0.585756	1.09315	0.42288	0	0.354035	0.532067	1.48098	0.730941	1.21452	0.428759	0.672196	1.99562
TCONS_00000563	XLOC_000334	16.5311	19.6689	38.8086	40.263	109.661	83.9183	99.2965	70.8033	35.3307	36.6046	23.8268	23.501
TCONS_00000564	XLOC_000335	456.309	505.363	238.33	238.344	628.482	580.031	405.964	329.26	377.7	332.123	367.997	376.901
TCONS_00000565	XLOC_000336	0	0	0	0	0	0	0	0	0	0	0	0.0716908
TCONS_00000566	XLOC_000336	0.118978	0.130834	0.141026	0.182174	0.288386	0	0.231164	0	0.227976	0	0.228835	0.174162
TCONS_00000567	XLOC_000336	0.118978	0.130834	0.141026	0.182174	0.288386	0.523091	0.231164	0.737319	0.227976	0.445087	0.228835	0.174162
TCONS_00000568	XLOC_000337	4.56027	4.40162	2.79587	2.78397	2.54103	3.24075	3.32093	3.91083	5.63565	4.92106	6.57041	6.33775
TCONS_00000569	XLOC_000338	32.1715	28.0381	6.68148	9.31515	1.77731	3.32453	2.648	3.49774	5.38586	4.39153	13.7869	11.5106
TCONS_00000570	XLOC_000339	0.169357	0.169303	0	0	0	0	0	0	0	0	0.0561608	0
TCONS_00000571	XLOC_000340	12.7162	12.5663	3.86134	0.849808	11.0222	9.0624	29.849	18.5759	14.1689	19.8966	32.9554	48.1653
TCONS_00000572	XLOC_000340	3.28859	2.35273e-09	1.08505	3.23502	5.10451	0.606273	2.60648	1.16964	0.0693265	0.0059195	4.11279e-05	0.676978
TCONS_00000573	XLOC_000340	0	1.52967e-05	0.00136566	8.8267e-07	0	0.376038	0	0.00151245	0	0	0.0343694	0
TCONS_00000574	XLOC_000340	0.00743347	0	0.00268233	0.0124565	0.0171084	0.00142037	0.005659	0.00392019	0.000238682	1.39304e-05	2.31355	0.00133196
TCONS_00000575	XLOC_000340	3.31382	5.79705	2.04534	1.18929	2.97505	1.35273	1.31044	1.68838	1.76275	0.389387	3.81025	3.08662
TCONS_00000576	XLOC_000340	0	0	0	0	0	0	0.448529	0	0	0.800662	0	0
TCONS_00000577	XLOC_000341	47.694	40.289	21.6758	20.3639	15.1225	15.34	15.1598	15.2397	19.793	17.776	29.2773	27.3579
TCONS_00000578	XLOC_000341	5.87037	8.45794	4.17854	3.96939	4.33926	5.53262	3.07139	5.17417	2.07011	3.95633	0.825863	2.29239
TCONS_00000579	XLOC_000342	0	0.434026	0	0	0	0	0	0	0.154058	0.156171	0.287947	0
TCONS_00000580	XLOC_000343	0.239974	0.119949	0	0	0	0.109902	0	0.0978388	0	0.08632	0.238734	0.0812755
TCONS_00000581	XLOC_000344	0.666219	0.835939	0.598116	0.938198	0.140277	0.448988	0.535875	0.493754	1.06409	0.974966	1.68289	1.22814
TCONS_00000582	XLOC_000344	0.269417	0	0	0	0.311025	0	0	0	0	0	0	0.684786
TCONS_00000583	XLOC_000345	143.864	147.385	2.48511	1.57592	1.02663	1.17317	0.888762	1.0444	1.88286	1.74415	6.189	6.50692
TCONS_00000584	XLOC_000346	0.77685	0.863344	1.16761	1.42007	0.983762	1.32133	1.14647	0.556082	2.43288	1.99849	1.22516	1.57038
TCONS_00000585	XLOC_000346	1.42418	1.18183	1.74866	1.68019	1.43334	2.41369	2.37067	3.1715	2.9855	2.78884	2.39062	2.8571
TCONS_00000586	XLOC_000347	0	0	0	0	0	0	0	0	0	0	0	0
TCONS_00000587	XLOC_000348	1.85834	1.45466	1.85376	2.43722	1.86761	1.76295	2.55549	1.48249	1.6681	2.12561	1.67688	2.08883
TCONS_00000588	XLOC_000348	1.30141	20.5495	3.76487	0.23654	0.0298513	0.0605528	0.105428	0.128694	0.0807455	0.110745	8.77835	0.360726
TCONS_00000589	XLOC_000348	0	0	0	0	0	0.796621	0	0	0	0	0	0
TCONS_00000590	XLOC_000348	29.4656	9.32648	7.77742e-08	4.07697	0.552405	1.34608	2.43678	2.3815	1.4738	2.45621	0.00275801	8.76876
TCONS_00000591	XLOC_000348	0.502925	1.02645	0	0.481414	1.35481	0	0	0	0.732776	0.361818	0.352797	0.340647
TCONS_00000592	XLOC_000348	1.6506	1.86107	4.7796	2.61282	2.99441	5.2078	7.9854	6.95056	11.5171	8.20581	7.47621	5.45529
TCONS_00000593	XLOC_000348	0.246461	1.02168	0.382795	0.751149	1.03696	0.774439	5.40676	2.50555	1.75949	3.68243	2.41766	2.95717
TCONS_00000594	XLOC_000349	2.09496	2.23014	0.0764486	0.074066	0	0	0.13076	0.126219	0.054926	0.111359	0.205323	0.157277
TCONS_00000595	XLOC_000350	14.75	14.1938	14.1549	11.8884	24.1734	22.7279	18.8116	17.8926	15.9653	13.9035	16.0327	14.6739
TCONS_00000596	XLOC_000350	31.2288	31.0949	25.4825	29.4275	41.9387	39.8322	38.6521	28.5737	27.2102	29.1699	27.246	32.8882
TCONS_00000597	XLOC_000351	13.8377	15.5416	4.611	4.98581	3.85396	5.00112	4.47152	4.31624	5.67918	4.79757	5.8603	6.74758
TCONS_00000598	XLOC_000352	11.9034	13.3936	5.03904	4.98062	4.3947	5.38068	4.87535	4.1598	5.52202	5.22705	6.56178	5.58478
TCONS_00000599	XLOC_000353	0	0	0	0	0	0	0	0	0	0	0	0
TCONS_00000600	XLOC_000354	6.38842	2.0565	7.63496	8.59652	9.87395	11.3532	10.2056	6.86147	6.69852	6.15616	6.07889	5.47729
TCONS_00000601	XLOC_000354	7.17331	6.11749	5.88345	7.6327	10.033	3.71751	2.09278	3.21117	4.65028	3.53296	0.749122	6.49688
TCONS_00000602	XLOC_000354	0.240095	2.75604	2.17254	0.0991868	3.09123	2.97747	9.36528	7.36828	0.354008	4.66664	2.50175	1.85974
TCONS_00000603	XLOC_000354	0	1.03269e-09	0	0	7.49872e-10	0	4.20457e-10	1.7874e-09	0	0	1.55228e-09	0
TCONS_00000604	XLOC_000355	0	0	0.284333	0	1.0928	0.730531	0	0.444667	0.259231	0.716693	0.819917	0.1848
TCONS_00000605	XLOC_000355	0.445751	0	1.4844	1.18684	1.31981	0.11516	1.64416	1.32431	0.354518	0.634368	0.0197324	0.763779
TCONS_00000606	XLOC_000355	0	0.440092	0	0	0	0.80111	0	0	0.353294	0	0.312419	0
TCONS_00000607	XLOC_000356	0	0	0	0	0	0	0	0	0	0	0	0
TCONS_00000608	XLOC_000356	13.9665	13.0984	53.4717	50.9822	45.7577	37.453	38.7976	47.7242	27.0783	25.4779	19.1457	16.4805
TCONS_00000609	XLOC_000357	1.8782	1.57984	0.121899	0.222773	0.0347927	0.250661	0.166044	0.132488	0.126552	0.18927	0.165364	0.144936
TCONS_00000610	XLOC_000358	4.654	6.67484	9.1242	7.69428	13.9378	7.75086	13.5745	6.73225	8.70657	8.70363	8.41712	4.01225
TCONS_00000611	XLOC_000358	21.5149	30.2772	54.1129	49.6442	46.5909	42.8631	5.8166	41.3018	38.7874	21.5987	22.6625	27.0408
TCONS_00000612	XLOC_000358	7.02887	1.9116	1.16179	2.57297	1.7904e-06	6.20131	34.5212	3.43531	0.0598304	11.1419	0.0191178	5.08904
TCONS_00000613	XLOC_000359	0.437601	0.909136	0.451033	0.27571	0.37342	0.265498	0.389993	0.692498	1.26808	0.52447	0.874755	0.600954
TCONS_00000614	XLOC_000360	0	0	0	0	0	0	0	0	0	0	0	0
TCONS_00000615	XLOC_000361	1.58176	1.65676	0.910923	0.815099	2.2231	1.33703	0.936759	0.729798	1.16229	1.22902	1.51869	1.34128
TCONS_00000616	XLOC_000362	0.74369	2.10445	0.757306	2.42308	1.79015	1.24453	3.17711	2.71961	2.07457	2.02023	2.21978	1.87893
TCONS_00000617	XLOC_000363	4.65291	4.31081	4.86669	6.42552	4.14847	9.61215	6.11558	7.11395	5.04647	5.58951	4.94609	3.61221
TCONS_00000618	XLOC_000364	6.21915	8.44092	7.17649	4.46453	8.68228	8.22631	7.30319	5.65272	5.25905	3.22426	10.6066	6.33503
TCONS_00000619	XLOC_000365	0.441916	0.441776	0	0	0	0	0	0	0	0	0	0.598681
TCONS_00000620	XLOC_000366	0	0	0	0	0	0	0	0	0	0	0	0
TCONS_00000621	XLOC_000367	1.07974	2.86522	0.628382	0.514666	0	0.768119	0.783885	1.06508	0	0.539549	0	0.550278
TCONS_00000622	XLOC_000368	0	0	0	0	0	0	0	0	0	0	0	0
TCONS_00000623	XLOC_000369	2.87969	4.67801	2.13333	3.78921	6.46295	5.9347	3.34484	2.64165	2.2991	1.81272	5.25215	3.90122
TCONS_00000624	XLOC_000370	12.445	1.67411	1.65414	1.60259	7.1494	0	0	0	3.56535	5.41602	0.0506085	4.71683
TCONS_00000625	XLOC_000371	0.116851	0.497796	0.672163	0.503129	0.453016	0.76717	0.954067	0.494024	0.622958	0.843595	1.13602	0.694837
TCONS_00000626	XLOC_000372	1.6472	6.5867	6.50815	4.72899	1.47874	3.0175	2.78293	2.68629	2.33795	4.74005	5.46229	1.11576
TCONS_00000627	XLOC_000373	0	0	0	0	4.609	0	0	0	0	0	1.70251	0
TCONS_00000628	XLOC_000374	0	0	0	0	0	0	3.81102	0	0	0	0	0
TCONS_00000629	XLOC_000375	0.779443	1.04388	1.78508	1.21991	2.09919	1.29401	2.09629	2.75412	2.73891	3.17753	1.85777	1.51752
TCONS_00000630	XLOC_000376	0	2.05817	3.618	2.55767	0	1.71745	2.01205	0	4.05404	0	2.02774	1.99104
TCONS_00000631	XLOC_000377	14.657	13.6698	17.0793	19.4567	16.9319	14.4258	16.1447	15.7458	16.9513	12.9924	13.5832	12.3006
TCONS_00000632	XLOC_000378	2.38906	2.3136	7.68396	9.13808	8.49154	8.35293	6.31698	4.19717	4.61567	5.25474	4.88927	5.21852
TCONS_00000633	XLOC_000379	0.951993	0.319015	0	1.26293	0.574215	1.18281	0.780999	0.758722	0.655463	1.34198	0.615138	0.554087
TCONS_00000634	XLOC_000380	0.999892	0.666383	0.658436	1.11635	0.897632	0.91585	2.25242	1.0871	0.827866	1.079	1.21578	1.12883
TCONS_00000635	XLOC_000381	1.87263	3.04571	0.223919	0	0	0	0.147554	0.061616	0	0	0.180362	0.153555
TCONS_00000636	XLOC_000382	0	0	0	0	0	0	0	0	0	0	0	0
TCONS_00000637	XLOC_000383	3.85646	5.14032	5.97881	2.46036	6.92411	2.35488	3.25773	2.0964	2.73684	6.18753	5.96795	8.70749
TCONS_00000638	XLOC_000384	0	2.69003	0	0	0.634754	0	0	0	0.501788	0	0.937885	0
TCONS_00000639	XLOC_000385	0.802926	1.8162	0.3399	0.548843	0.670738	1.26075	0.616094	0.123751	0.703011	0.330076	0.266131	0.40739
TCONS_00000640	XLOC_000386	0	0	0	0	0	0	0	0	0	0	0	0
TCONS_00000641	XLOC_000387	12.2461	8.16147	9.07216	11.7192	7.32911	12.1515	6.89657	11.6499	4.34538	5.87331	4.73776	4.14756
TCONS_00000642	XLOC_000388	0	0	0	0	0	0	0	0	0	0	0	0
TCONS_00000643	XLOC_000389	0.0913747	0.0608972	0.060171	0.0582956	0.109373	0.0557964	0.0257295	0.149016	0.043231	0.021912	0.101003	0.041263
TCONS_00000644	XLOC_000390	0.167328	0.496444	0.163508	0	0.301818	0.153608	0.141459	0.134978	0.237198	0	0.11146	0.112128
TCONS_00000645	XLOC_000391	0	0	0	0	0	0	0	0	0	0	0	0
TCONS_00000646	XLOC_000392	0	0	0	0	0	0	0	0	0	0	0	0
TCONS_00000647	XLOC_000393	0	0.549766	0	0	0	0	0	0	0	0	0	0
TCONS_00000648	XLOC_000394	9.89893	11.3802	10.7556	7.10478	4.44328	3.17342	5.01726	5.65019	7.72753	6.40926	6.89345	8.7168
TCONS_00000649	XLOC_000395	2.86826	4.55824	5.52089	7.44952	6.52479	9.29594	5.63209	5.22822	3.75782	4.6007	3.70694	3.28785
TCONS_00000650	XLOC_000396	3.14754	3.1854	6.31967	3.47124	5.76891	3.08944	3.75788	3.23716	1.87789	3.42312	1.75256	2.63237
TCONS_00000651	XLOC_000397	1.15927	1.15324	1.34158	2.3316	0.987275	0.829527	1.36345	0.364955	2.21101	1.3045	3.08612	2.82482
TCONS_00000652	XLOC_000398	0	0	0	0	0	0	0	0	0	0	0	0
TCONS_00000653	XLOC_000399	0	0	0	0	0	0	0	0	0	0	0	0
TCONS_00000654	XLOC_000400	0.394862	0	0.35895	0	0	0.368419	0	0	0.261385	0	0	0
TCONS_00000655	XLOC_000401	0	0.318193	1.25759	0.609198	0	0	0	0	0.225885	0.228984	0.211099	0
TCONS_00000656	XLOC_000402	0	0	0	0	0	0	0	0	0	0	0	0
TCONS_00000657	XLOC_000403	25.7844	29.9713	1.65637	3.13099	1.61833	2.8517	2.52883	3.15204	0.57029	1.56739	5.30425	8.63471
TCONS_00000658	XLOC_000404	14.4069	13.5893	15.6077	12.4528	11.056	10.0034	13.0535	16.8634	15.996	13.0392	16.1048	19.2815
TCONS_00000659	XLOC_000405	7.06607	5.97215	6.47199	5.71702	9.05379	9.53173	11.9381	6.86173	7.24841	7.2092	9.15974	8.87649
TCONS_00000660	XLOC_000406	0.778088	1.37062	0.600002	0.56728	0.924633	1.17398	1.10985	0.551533	0.391649	0.981004	0.526029	0.807967
TCONS_00000661	XLOC_000407	4.67331	5.73361	0	0.406568	0.204672	0.583707	0.576653	0.367385	0.150752	0.305639	0.563536	0
TCONS_00000662	XLOC_000408	0	1.05277	3.80092	3.29497	4.97628	3.94213	1.94706	0	1.85298	0	1.71266	0.000103532
TCONS_00000663	XLOC_000409	4.10772	3.8257	3.67619	2.81975	2.56863	2.29455	2.18511	2.65987	3.65801	3.88895	2.99024	3.46912
TCONS_00000664	XLOC_000410	2.8225	4.54778	3.2036	4.01966	4.22375	3.42822	1.72914	4.1727	2.62821	3.00945	2.96873	3.64841
TCONS_00000665	XLOC_000411	0.141616	0.707853	0.419647	0.135523	1.39846	0.907988	0.478517	0.577375	1.00501	0.713159	0.845304	1.15111
TCONS_00000666	XLOC_000412	0	0	0	0	0	2.78535	0	0	0	0	0	0
TCONS_00000667	XLOC_000413	0.477057	0.238453	1.64926	0.228266	1.07067	0.21848	0.648127	0.388998	0.846389	0.3432	0.790987	0.646287
TCONS_00000668	XLOC_000414	0.473633	0.236741	0	0.226628	1.91337	0.867647	0	0.579309	0	0.340737	0	0.160412
TCONS_00000669	XLOC_000415	0	0	0	0	0	0	0	0	0	0	0	0
TCONS_00000670	XLOC_000416	0.352617	0.541416	0.435892	0	0.468535	0.478044	0.440884	0.644122	0.370596	0.563434	0.231091	0.589212
TCONS_00000671	XLOC_000417	9.24112	8.2119	11.8135	12.0041	12.08	12.6684	11.7325	9.17213	9.92295	11.9561	13.3629	9.1992
TCONS_00000672	XLOC_000418	1.26029	0.235614	0.754499	1.99263	1.48109	1.04147	0.398195	0.845898	0.54772	1.6421	0.781571	1.23073
TCONS_00000673	XLOC_000419	0	0	0	0	0	0	0	0	0	0	0	0
TCONS_00000674	XLOC_000420	0	0	0	0	0	0	0	0	0	0	0	0
TCONS_00000675	XLOC_000421	0	0	0	0	0	0	0	0	0	0	0	0
TCONS_00000676	XLOC_000422	0	0	0	0	0	0	0	0	0.203624	0	0	0
TCONS_00000677	XLOC_000423	0	0	14.5288	7.03798	0	6.73625	6.21261	5.99686	15.6577	15.8725	4.8776	9.96329
TCONS_00000678	XLOC_000424	0	0.629089	0.395892	1.36928	0.79534	1.03796	0.786256	1.01877	0.639223	0.239509	0.731638	1.06767
TCONS_00000679	XLOC_000425	1.11224	0.555943	1.64794	1.59658	0	0	0.46978	0.453466	0.394665	1.20024	0.737662	0
TCONS_00000680	XLOC_000426	0	0	0	0	0	4.40542	3.13987	0	0	0	1.59494	1.62896
TCONS_00000681	XLOC_000427	0	0.913048	1.26771	0	0.807079	1.05275	0.134164	2.2802	2.04481	1.63591	0.354287	1.0682
TCONS_00000682	XLOC_000428	1.97979	0.659719	0.651852	1.46246	2.36975	2.41784	0	0.538113	0.468335	0.94952	0.43768	0.447015
TCONS_00000683	XLOC_000429	0	0	0	1.02968	2.89778	5.71902	1.45569	1.68887	4.34189	0	0.713606	0
TCONS_00000684	XLOC_000430	6.1174	6.52992	3.69264	4.08546	4.152	3.02588	6.35931	2.70803	2.59825	3.82443	3.19729	2.13007
TCONS_00000685	XLOC_000431	0.28603	2.58852	1.22909	1.46557	2.3066	2.31765	1.47986	2.56941	2.0836	1.72427	1.40266	1.85648
TCONS_00000686	XLOC_000432	0.443008	0.687208	0	0.482526	1.23677	0.987808	1.1614	0.280267	0.299859	0.921487	0.2499	0.393659
TCONS_00000687	XLOC_000433	0	0	0	0.0937924	0.0879857	0.179543	0	0.0799178	0.208664	0	0.0650019	0.132777
TCONS_00000688	XLOC_000434	6.65471	5.68176	0	0	0	0	2.5429	0	0.675484	1.36855	2.43648	2.48736
TCONS_00000689	XLOC_000434	0	0.29644	2.22057	1.76874	1.08556	1.46191	0	2.1687	0.595018	0.130872	0.0211645	0.600518
TCONS_00000690	XLOC_000435	1.67839	1.49506	0.375737	0.137081	0.0430111	0.0428913	0.0393592	0	0.0323127	0.069031	0.318993	0.440816
TCONS_00000691	XLOC_000436	1.37788	1.88858	0	0	0.0586571	0.0903979	0.293439	0.323944	0.0463698	0.0735363	0	0.0442589
TCONS_00000692	XLOC_000436	0	0	0	0	0	0	0	0	0	0	0	0
TCONS_00000693	XLOC_000437	1.0089	0.259349	1.1909	0.735958	0.876713	0.680417	0.781701	0.552328	0.358208	0.503841	1.46209	0.357422
TCONS_00000694	XLOC_000438	127.088	112.358	52.963	49.092	54.8467	59.7377	106.05	86.8128	109.766	93.8393	74.3713	78.5769
TCONS_00000695	XLOC_000439	0.039094	0.0198968	0	0	0	0	0	0.0492272	0.0442018	0	0	0
TCONS_00000696	XLOC_000439	0.039094	0.0198968	0.0411958	0.153622	0.181776	0.15928	0.289617	0.0492272	0.0442018	0.301094	0.186279	0.192874
TCONS_00000697	XLOC_000440	85.2239	84.5631	67.4566	67.422	56.0008	53.2642	65.903	62.1631	81.4311	81.0256	79.7986	82.2862
TCONS_00000698	XLOC_000441	0.506428	0.377575	0.56293	0.432316	0.486787	0.315762	0.194094	0.366498	1.05624	0.372968	0.318879	0.514801
TCONS_00000699	XLOC_000442	22.2807	23.9027	18.9059	18.912	12.0225	12.565	16.4689	16.4768	21.5734	18.2245	18.8251	19.8889
TCONS_00000700	XLOC_000443	0.777514	0.901786	0.360007	0.300707	0.719824	0.761775	0.492599	0.436292	0.366522	0.645478	0.716016	0.508938
TCONS_00000701	XLOC_000443	3.17929	1.18887	0.312835	2.15133	0.758244	1.55354	1.72176	0.848666	0.723256	0.00576017	1.98822	1.95465
TCONS_00000702	XLOC_000443	0	0	0.383927	0.0565358	0.0640021	0	0	0	0	0	0	0
TCONS_00000703	XLOC_000443	0	3.19219	1.0506	0	1.49169	0.509942	0	1.002	1.60216	2.25053	1.72834	0.567822
TCONS_00000704	XLOC_000444	6.12262	6.64604	2.05089	4.44745	4.95623	6.54956	6.94308	6.8035	7.55864	6.13461	6.59434	5.91896
TCONS_00000705	XLOC_000444	0	0	4.44425	2.87062	1.34645	1.37377	0	1.22298	0	0.917605	2.48307e-10	0
TCONS_00000706	XLOC_000444	9.27957	6.18505	8.71855	12.3346	23.6558	13.2381	19.0788	21.2781	7.01544	16.9555	10.4308	7.99167
TCONS_00000707	XLOC_000445	0.276531	0.252971	0	0	0.163199	0.100187	0	0.0891901	0	0	0	0
TCONS_00000708	XLOC_000446	0	0	0	0	0	0	0	0	0	0	0	0
TCONS_00000709	XLOC_000446	1.02051	0.510092	0	0	0	0	0.431036	0	0	0	0	0
TCONS_00000710	XLOC_000447	72.6347	69.5617	1.66659e-07	0.916154	0.572956	1.38935e-07	0.404944	0.572461	9.60976e-08	4.01348e-08	2.93512e-07	0.25939
TCONS_00000711	XLOC_000447	5.31161	5.11652	0.691761	0	0	0.660941	0	0	0.172041	0.188771	0.304548	0
TCONS_00000712	XLOC_000448	53.7326	50.1397	28.7265	29.2451	18.2897	14.7435	14.5171	19.2757	14.3481	14.0973	14.6466	15.6965
TCONS_00000713	XLOC_000449	1.67329	3.9741	2.22641e-07	1.10152	1.26024	3.43727	2.08232	0	4.87977	0.751441	2.45269	1.83169
TCONS_00000714	XLOC_000449	0.628789	0.628589	2.71605	2.6314	0.806402	1.12495	0.834692	1.15504	1.00682	0.904714	0.872437	0.883347
TCONS_00000715	XLOC_000449	9.0381	6.83377	7.49844	6.90423	3.5393	3.35389	4.06723	9.06952	10.7055	10.5633	9.79532	11.9542
TCONS_00000716	XLOC_000450	4.01308	4.05873	0	0	0	0	0.0198248	0.0382726	0.183204	0.0337667	0.638153	0.508695
TCONS_00000717	XLOC_000451	0.484055	0.403251	0.0796885	0	0	0	0	0	0	0	0.0535061	0
TCONS_00000718	XLOC_000452	0.309664	0.229003	0.028284	0	0	0	0	0	0	0	0	0
TCONS_00000719	XLOC_000453	0.137868	0.241193	0	0.0329841	0.030942	0.03157	0	0.0562096	0	0.0743879	0.0228593	0.0233469
TCONS_00000720	XLOC_000454	0	0.402662	0	0	0.256837	0	0	0.193663	0.203036	0.205821	0	0.630515
TCONS_00000721	XLOC_000454	1.39529	1.36008	0.772954	2.4818	2.37498	0.632408	2.01175	1.50683	1.0615	1.65481	1.45539	1.04344
TCONS_00000722	XLOC_000455	23.4235	21.1118	22.3984	21.4619	18.1758	18.83	18.9976	20.7761	22.282	20.795	21.278	22.2804
TCONS_00000723	XLOC_000456	7.65852	8.68453	1.69361	1.20327	2.87325	2.93156	3.76584	2.33017	3.1637	3.9472	7.65686	8.43961
TCONS_00000724	XLOC_000457	11.1389	11.5556	7.26587	5.63153	4.90553	5.19759	6.03633	3.94159	6.71181	8.16466	6.55125	5.69446
TCONS_00000725	XLOC_000457	31.8366	29.255	21.8049	27.9844	11.913	13.3536	13.2115	19.5407	17.7231	15.1484	23.2943	22.1725
TCONS_00000726	XLOC_000458	0.35441	0.260046	0.266828	0.196859	0.12866	0	0.11929	0.10749	0.422875	0.308389	0.305232	0.191453
TCONS_00000727	XLOC_000458	0	0	0	0	0.33497	0.245863	0	0	0	0	0	0.108984
TCONS_00000728	XLOC_000458	0	0	0	0	0.33497	0.245863	0.334531	0	0	0	0	0.108984
TCONS_00000729	XLOC_000458	0	0.0305947	0	0.0609099	0.00017876	0.20664	0.000100537	0.144416	0.0382675	0.138178	0.160157	2.87537e-05
TCONS_00000730	XLOC_000458	0	0.0305947	0	0.0609099	0.00017876	0.20664	0	0.144416	0.0382675	0.138178	0	2.87537e-05
TCONS_00000731	XLOC_000459	1.28104	1.27742	0.714899	0.777837	1.52165	1.13374	1.25849	0.109487	1.15054	0.807484	1.11172	1.00403
TCONS_00000732	XLOC_000459	4.96291e-09	2.47126e-08	3.68154e-09	1.63891e-08	2.06244e-08	4.92189e-09	4.28941e-09	0.963946	1.69846e-08	0.86846	3.24951e-08	2.5022e-09
TCONS_00000733	XLOC_000460	611.485	659.537	1.89597	0.787233	3.20014	1.00464	0.926548	0.894371	1.36219	0	0	0.371481
TCONS_00000734	XLOC_000461	2.08883	1.80503	0.314735	0.338807	0.349614	0.51885	0.478517	0.317556	0.301503	0.15282	0.328729	0.31176
TCONS_00000735	XLOC_000462	1.59506	0.765695	2.43138	1.51003	1.08547	1.55555	2.70613	0.629813	0.899762	0.629072	1.79167	2.48431
TCONS_00000736	XLOC_000462	2.71693	1.36902	1.54115	3.24015	0.000963539	0	2.09368	2.53929	1.72647	3.07556	0.476549	1.13095
TCONS_00000737	XLOC_000462	13.4551	0.30382	5.34112e-08	0	0.456768	0	0.815144	0	0	0	0	0.115387
TCONS_00000738	XLOC_000462	1.003	2.76854	1.10342	0	3.15791	2.08904	1.77731	2.63085	1.54823	0	1.07724	1.1209
TCONS_00000739	XLOC_000462	16.6421	28.9215	0	0	2.43685	0.652169	1.15623	0.894378	0.87991	1.13544	3.6951e-09	0.929592
TCONS_00000740	XLOC_000462	39.4089	29.2357	0.909381	1.0227	0.758748	1.20408	0	0.785179	0.352514	1.87613	1.02624	0
TCONS_00000741	XLOC_000463	8.7507e-08	0.000163008	8.88876e-05	0.000869675	0.000217279	0.0172528	1.77243e-06	2.08357e-05	0.000751832	0.000954215	1.13326e-08	3.28325e-05
TCONS_00000742	XLOC_000463	2.3298	0.00200776	4.04264e-05	6.12803e-09	1.7155e-10	0	0.00142566	0.231885	0	0.439764	7.90295e-10	0.983009
TCONS_00000743	XLOC_000463	3.39484	3.30645	5.13045	5.53998	4.96253	5.5265	4.42348	4.6563	4.05634	3.34235	2.98105	3.01831
TCONS_00000744	XLOC_000463	4.24056	4.05458	6.38764	6.78681	6.11028	6.89424	5.53359	5.73323	4.98962	4.16886	3.63827	3.78939
TCONS_00000745	XLOC_000463	0.112662	2.89292	7.44057	6.04003	3.67314	6.01266	4.14748	4.29563	2.66804	3.72316	2.52549	0.764545
TCONS_00000746	XLOC_000464	2.01557	1.97013	1.86552	2.04313	2.90304	3.535	1.29647	1.50654	1.07808	1.00426	1.44635	1.08463
TCONS_00000747	XLOC_000465	75.8699	69.656	114.563	111.785	100.738	96.4886	70.6071	73.9837	53.4723	53.2759	58.0687	47.1026
TCONS_00000748	XLOC_000465	20.827	19.302	29.393	24.6264	19.0594	23.0673	2.7446	10.9816	8.59451	8.14307	25.2287	26.7725
TCONS_00000749	XLOC_000466	0	0.119309	0.173256	0.52211	0.0929334	0.26113	0.120208	0.166828	0	0.391871	0.00340018	0.128386
TCONS_00000750	XLOC_000467	0	0	0	0	0	0	0	0	0	0	0	0
TCONS_00000751	XLOC_000468	0	0	0	0	0	0	0	0	0	0	0	0
TCONS_00000752	XLOC_000468	0	0	0.351719	0	0	0.652296	0	0	0	0	0	0
TCONS_00000753	XLOC_000469	0	0	0	0	0	0	0	0	0	0	0	0
TCONS_00000754	XLOC_000469	0.0985592	0	0	0	0	0.161833	0	0	0.0846274	0	0	0.0446181
TCONS_00000755	XLOC_000469	0	0	0	0	0	0	0	0.166427	0	0	0	0
TCONS_00000756	XLOC_000469	0.0767568	0.0534658	0.27488	0.0512712	0	0.199948	0.361188	0	0.196618	0.11349	0.175121	0.0369585
TCONS_00000757	XLOC_000470	8.50863	10.2294	0.164794	0.106439	0.0998489	0.0509377	0.046978	0.0906933	0.157866	0.120024	0	0.0753397
TCONS_00000758	XLOC_000471	0.0465899	0.0859446	0.0656739	0.127424	0.335156	0.184781	1.95251	1.6492	11.0783	5.74044	3.31607	4.89864
TCONS_00000759	XLOC_000471	0.0465899	0.0859446	0.0656739	0.127424	0.335156	0.184781	1.95251	1.6492	11.0783	5.74044	3.31607	4.89864
TCONS_00000760	XLOC_000471	0.0465899	0.0859446	0.0656739	0.127424	0.335156	0.184781	1.95251	1.6492	11.0783	5.74044	3.31607	4.89864
TCONS_00000761	XLOC_000472	0	0	3.03187	5.14041	7.76376	4.50658	2.49924e-05	7.50856	1.96518e-06	1.33141	6.61609	3.6385
TCONS_00000762	XLOC_000472	0	0	0	0	0.786201	0	0	0	0	0	0	0
TCONS_00000763	XLOC_000472	4.67949	4.31816	0	0	0	5.33348	8.81818	0	7.15276	4.18906	0	0
TCONS_00000764	XLOC_000473	10.9235	11.186	4.68074	4.67061	7.01244	5.98494	5.94212	6.52259	8.90827	9.58724	11.1448	10.9805
TCONS_00000765	XLOC_000473	10.9235	11.186	4.68074	4.67061	7.01244	5.98494	5.94212	6.52259	8.90827	9.58724	11.1448	10.9805
TCONS_00000766	XLOC_000474	13.7987	12.3476	3.62403	2.89773	4.23379	3.55142	7.47117	8.04354	6.55111	4.76157	7.44942	9.32977
TCONS_00000767	XLOC_000474	8.17452	5.21284	1.836	4.98581	4.67713	3.14531	3.37457	2.33126	5.10784	4.27009	7.70812	7.62348
TCONS_00000768	XLOC_000474	5.1002	10.5448	5.07176	0.493867	4.2103	4.39419	3.26942	5.38294	9.81482	11.7013	8.80015	8.30942
TCONS_00000769	XLOC_000475	0.574851	1.14934	1.93057	2.3105	1.34176	0.842454	1.65105	1.12498	2.52934	2.72946	0.99126	1.7133
TCONS_00000770	XLOC_000476	5.24629	7.4529	38.1838	38.0507	61.8464	61.4577	55.514	47.3945	32.4308	43.5031	27.561	27.6813
TCONS_00000771	XLOC_000477	1.20106	1.17885	2.37272	1.54645	1.47031	1.34013	1.80782	1.38891	2.97553	2.49791	1.73797	2.18922
TCONS_00000772	XLOC_000478	9.46318	9.08208	8.26724	11.0008	9.74547	7.75099	9.17069	9.99691	7.08766	6.1463	6.21586	6.53877
TCONS_00000773	XLOC_000479	3.68402	25.2607	0.990077	0.0254278	0.299029	1.99866	0.756789	5.89582	0.00552376	0.112018	0.0119581	5.54566
TCONS_00000774	XLOC_000479	21.311	0.314922	24.3784	31.0644	30.3219	27.0114	35.9239	31.5489	36.6979	31.601	31.3896	25.6544
TCONS_00000775	XLOC_000479	0	0	2.17293	0	0	0	1.85818	0	0	0	0.519355	0
TCONS_00000776	XLOC_000479	1.16517	2.98765	1.21486	1.20348	2.67191	3.93879	0.669453	1.40797	2.11287	2.43737	1.61286	2.95698
TCONS_00000777	XLOC_000480	1.14758	0.786441	0.651835	0.811017	1.65566	1.36073	0.834504	0.668505	0.719743	0.961759	0.697717	0.702623
TCONS_00000778	XLOC_000480	0.268721	0.125623	0.684479	0.599095	0.348316	0.244483	0.651717	0.615485	0.531692	0.137765	0.542946	0.601268
TCONS_00000779	XLOC_000480	2.46716e-05	2.49548e-05	7.20411e-05	0.000123987	5.83311e-05	2.37069e-05	5.62674e-05	0.000103073	9.27652e-05	1.34502e-05	0.000131481	4.46692e-05
TCONS_00000780	XLOC_000480	44.626	39.7616	30.7031	68.5761	92.7988	73.2689	69.5971	48.5787	51.5783	62.2852	54.8596	45.8748
TCONS_00000781	XLOC_000480	0.00263715	0.000181976	41.1332	9.13688	0.00268471	0.000735975	13.5827	27.4193	7.63501	0.000137613	11.2003	16.5503
TCONS_00000782	XLOC_000481	0.0378399	0	0.149507	0.108636	0.03397	0.0693189	0.0639304	0.154276	0.0537082	0.0816674	0.100385	0.0256316
TCONS_00000783	XLOC_000482	0.172305	0	0.170196	0.0824459	0	0	0	0	0.244562	0.0619791	0.171415	0.175071
TCONS_00000784	XLOC_000483	0.422129	0.599983	0.598858	0.388346	0.189479	1.08692	0.344081	0	0.147557	0.149716	0.135139	0.397979
TCONS_00000785	XLOC_000483	8.3072	7.67012	9.39199	10.0424	11.3099	8.63204	9.80688	10.8687	9.91107	10.6919	7.81078	7.35919
TCONS_00000786	XLOC_000484	0	0	0	0	0	0	0	0	0	0	0	0
TCONS_00000787	XLOC_000484	0	0	0	0	0	0	0	0	0	0	0	0
TCONS_00000788	XLOC_000484	0.0490685	0.101415	0.060507	0.106039	0.0701765	0.0611189	0.00614723	0.0988597	0.0837239	0.0512815	0.042061	0.087694
TCONS_00000789	XLOC_000484	0.811291	0.753309	0.902039	0.956582	0.947149	0.967996	0.179324	1.06627	1.10438	1.21937	0.384761	1.10323
TCONS_00000790	XLOC_000484	0.811291	0.753309	0.902039	0.956582	0.947149	0.967996	0.179324	1.06627	1.10438	1.21937	0.384761	1.10323
TCONS_00000791	XLOC_000484	0.662541	0.625622	0.738846	0.795151	0.783685	0.791456	0.146249	0.882248	0.914595	0.997136	0.320926	0.896807
TCONS_00000792	XLOC_000484	0.662541	0.625622	0.738846	0.795151	0.783685	0.791456	0.146249	0.882248	0.914595	0.997136	0.320926	0.896807
TCONS_00000793	XLOC_000484	0.662541	0.625622	0.738846	0.795151	0.783685	0.791456	0.146249	0.882248	0.914595	0.997136	0.320926	0.896807
TCONS_00000794	XLOC_000484	0.662541	0.625622	0.738846	0.795151	0.783685	0.791456	0.146249	0.882248	0.914595	0.997136	0.320926	0.896807
TCONS_00000795	XLOC_000484	0.0400645	0.0842114	0.0495515	0.0881292	0.0580552	0.0499632	0.0050125	0.0817842	0.0693246	0.0419277	0.035077	0.0712725
TCONS_00000796	XLOC_000484	0.294773	0.297707	0.332657	0.379732	0.367416	0.353809	1.13081	0.413625	0.430324	0.44602	1.08501	0.391708
TCONS_00000797	XLOC_000484	0.294773	0.297707	0.332657	0.379732	0.367416	0.353809	1.13081	0.413625	0.430324	0.44602	1.08501	0.391708
TCONS_00000798	XLOC_000484	0.294773	0.297707	0.332657	0.379732	0.367416	0.353809	1.13081	0.413625	0.430324	0.44602	1.08501	0.391708
TCONS_00000799	XLOC_000484	0.294773	0.297707	0.332657	0.379732	0.367416	0.353809	1.13081	0.413625	0.430324	0.44602	1.08501	0.391708
TCONS_00000800	XLOC_000484	0.294773	0.297707	0.332657	0.379732	0.367416	0.353809	1.13081	0.413625	0.430324	0.44602	1.08501	0.391708
TCONS_00000801	XLOC_000484	0.0178123	0.0400461	0.0222941	0.0420592	0.0271997	0.0223192	0.0392037	0.038317	0.0325958	0.0187408	0.119237	0.0311074
TCONS_00000802	XLOC_000484	0.0178123	0.0400461	0.0222941	0.0420592	0.0271997	0.0223192	0.0392037	0.038317	0.0325958	0.0187408	0.119237	0.0311074
TCONS_00000803	XLOC_000484	0.0178123	0.0400461	0.0222941	0.0420592	0.0271997	0.0223192	0.0392037	0.038317	0.0325958	0.0187408	0.119237	0.0311074
TCONS_00000804	XLOC_000484	0.0178123	0.0400461	0.0222941	0.0420592	0.0271997	0.0223192	0.0392037	0.038317	0.0325958	0.0187408	0.119237	0.0311074
TCONS_00000805	XLOC_000484	0.294773	0.297707	0.332657	0.379732	0.367416	0.353809	1.13081	0.413625	0.430324	0.44602	1.08501	0.391708
TCONS_00000806	XLOC_000484	0	0.542215	0.535663	0.519056	0.243447	0.496708	0.231579	0.442249	1.92454	0.195064	0.181946	1.10192
TCONS_00000807	XLOC_000485	8.76698	10.653	1.59872	1.4359	0.465998	0.200854	2.43672	1.67384	2.6132	2.60556	5.1204	4.42052
TCONS_00000808	XLOC_000485	0	0.413988	0.625444	0.997861	1.13687	0.966622	0.336408	0.468175	0.59915	0.188833	0.681289	0.925404
TCONS_00000809	XLOC_000486	0.978477	0.652111	0	0.156063	0	0.149372	0.137761	0	0	0.351964	0.216316	0.331395
TCONS_00000810	XLOC_000486	0	0	0	0	0	0	0	0.168244	0	0	0	0
TCONS_00000813	XLOC_000486	0.348045	0.683254	0.45007	0.218022	0.613571	0.104337	0.192453	0.292891	0.161681	0.245848	0.302195	0.231481
TCONS_00000811	XLOC_000487	3.56047	0	0	4.26706	0	0	4.79948	0	1.57835	3.30588	0	3.17165
TCONS_00000812	XLOC_000487	9.08063	11.2884	5.42052	1.56318	7.20019	6.76635	5.42186	9.37969	9.12136	7.68153	15.2581	11.6768
TCONS_00000814	XLOC_000488	0.839305	0	0	0	0	0	0.311357	0.103182	0	0	0	0
TCONS_00000815	XLOC_000489	6.77363	6.47148	11.3912	12.1849	7.35094	8.71743	7.93113	8.98409	8.36675	7.83385	7.62006	7.25989
TCONS_00000816	XLOC_000490	0	0	0	0	0	0	0	0	0	0	0	0
TCONS_00000817	XLOC_000490	0	0	0	0	0	0	0	0	0	0	0	0
TCONS_00000818	XLOC_000490	0	0.225417	0	0	0	0	0	0	0	0	0	0
TCONS_00000819	XLOC_000491	0.220466	1.54277	0	0	0	0	0	0	0.0909389	0	0.292436	0.149337
TCONS_00000820	XLOC_000491	0.773039	0.0824475	0	0	0	0.0827273	0	0	0	0.129953	0.126874	0.0953794
TCONS_00000821	XLOC_000492	0	1.64844	0	0	0	0	0	0	0	0	0	0.376698
TCONS_00000822	XLOC_000493	41.663	40.1736	4.06322	4.3908	4.92382	4.5407	6.638	8.21361	11.6023	10.3956	14.7603	18.7546
TCONS_00000823	XLOC_000494	15.958	15.9255	0.307477	0.227801	0.39452	0.427684	0.154682	0.358344	0.116954	0.263463	0.837955	0.688384
TCONS_00000824	XLOC_000494	0	0	0.307477	0.227801	0.39452	0	0.154682	0	0.116954	0.263463	0	0
TCONS_00000825	XLOC_000494	15.958	15.9255	0.307477	0.227801	0.39452	0.427684	0.154682	0.358344	0.116954	0.263463	0.837955	0.688384
TCONS_00000826	XLOC_000495	30.3104	26.5796	0.161616	0.117434	0.330492	0.449599	0.172771	0.233479	0.174174	0.205991	1.08516	0.720397
TCONS_00000827	XLOC_000496	13.9783	9.98134	17.4704	17.1989	17.1585	21.4261	20.9655	23.2614	24.9014	22.3698	22.5146	22.4152
TCONS_00000828	XLOC_000497	3.4994	3.4983	5.01045	5.42779	6.73457	6.39095	8.53385	7.47832	7.15414	6.85194	5.64961	6.06733
TCONS_00000829	XLOC_000497	3.4994	3.4983	5.01045	5.42779	6.73457	6.39095	8.53385	7.47832	7.15414	6.85194	5.64961	6.06733
TCONS_00000830	XLOC_000498	11.2155	12.6622	0	0.30843	0.575813	0.553003	0	0.0610519	0	0.0742535	0.210725	0.328788
TCONS_00000831	XLOC_000499	9.44101	10.5118	8.26449	10.225	8.72922	7.97432	8.78712	9.08124	13.8013	11.8758	10.5358	9.1139
TCONS_00000832	XLOC_000500	2.04805	0.682468	0	0.653313	1.87613	0.879684	1.03021	1.11334	0.899223	0.426342	0.766896	0.543246
TCONS_00000833	XLOC_000500	1.42621	2.7701	0	2.16041	1.24021	0	3.67235e-07	0.46887	0	1.16149e-08	0	0.658292
TCONS_00000834	XLOC_000500	2.02019	0.673183	3.03929	1.28885	1.3924	2.33075	3.053	2.19638	3.1075	3.37038	2.53657	2.6944
TCONS_00000835	XLOC_000501	0.030857	0	0	0	0.0277012	0	0.0260664	0	0	0	0	0
TCONS_00000836	XLOC_000501	0	0	0	0	0	0	0	0	0	0	0	0
TCONS_00000837	XLOC_000502	0	0	0	0	0	0	0	0	0.0442382	0.0896902	0	0
TCONS_00000838	XLOC_000503	0.0469827	0	0	0	0	0.0362967	0	0.0323127	0.0281226	0	0.0262818	0
TCONS_00000839	XLOC_000504	0.73813	1.30708	1.72919	2.26136	4.12785	4.74276	4.04451	3.17962	2.90554	2.32786	2.53157	2.17524
TCONS_00000840	XLOC_000505	0.0832542	0.0832278	0	0.0796723	0	0.0762566	0	0.0678865	0	0	0	0
TCONS_00000841	XLOC_000506	0.029865	0	0	0.269708	0	0	0	0	0.100554	0.0787394	0.197248	0
TCONS_00000842	XLOC_000507	0.129863	0.441079	0.259269	0.17665	0.551425	0.930744	0.415438	0	0.468396	0.0498444	0.258038	0.518416
TCONS_00000843	XLOC_000507	0.129863	0	0	0.17665	0	0	0	0	0.0936791	0.0498444	0	0
TCONS_00000844	XLOC_000508	0	0	0	0	0.134512	0.137264	0.0358513	0.101933	0	0	0	0
TCONS_00000845	XLOC_000508	10.1127	8.806	0.0488985	0.0619646	0	0	0.0603189	0	0.588319	0.333	1.39708	0.427631
TCONS_00000846	XLOC_000508	48.4982	53.0349	0.00794744	0.0115167	0	0	0.00942585	0	0.105703	0.0533216	3.90071	5.32163
TCONS_00000847	XLOC_000509	0.514169	0.916984	0.718283	1.54213	1.26558	1.57019	1.8573	1.20275	0.741852	1.20464	1.09388	0.739023
TCONS_00000848	XLOC_000510	0.161238	0.161119	0.159857	0	0.048549	0.0492053	0.137324	0.0882387	0	0.0388898	0.107828	0.0729818
TCONS_00000849	XLOC_000511	0	0	0	0	0	0	0	0	0	0	0	0
TCONS_00000850	XLOC_000512	0	0	0	0	0	0	0	0	0	0	0	0
TCONS_00000851	XLOC_000513	23.7245	28.1896	110.571	125.096	215.016	257.098	157.569	195.3	78.6478	92.3897	90.4837	73.1135
TCONS_00000852	XLOC_000514	0.0504426	4.28011	7.37354e-05	1.80515e-06	0.00326983	2.67462e-06	1.76051	4.44173	0.554485	2.54144	3.16908	3.31104
TCONS_00000853	XLOC_000514	0.115022	0.257813	0.0841778	0	0.106616	0	0	0	0.0859822	0	0.147414	0.269415
TCONS_00000854	XLOC_000514	2.39524e-05	9.79448e-07	7.37354e-05	1.8007e-08	8.46272e-06	2.67462e-06	3.50356e-05	4.52372e-06	0.0906545	2.53541e-05	8.83647e-06	3.60847e-05
TCONS_00000855	XLOC_000514	4.5048	1.07003	3.38902	3.28328	2.45383	2.42422	3.52044	1.48084	6.21075	3.81206	4.75061	4.96511
TCONS_00000856	XLOC_000514	1.30384	1.04661	0.653033	0.557143	0.538895	0.888507	1.97412	1.72993	1.17663	1.2181	1.59811	1.8146
TCONS_00000857	XLOC_000515	1.54145	2.67942	0.850412	2.55872	1.46864	3.83429	1.41992	1.23314	1.89325	1.22068	0.238676	2.30278
TCONS_00000858	XLOC_000515	2.76913	0.28219	8.35659	4.43193	7.98326	4.85289	6.37819	5.00375	3.5246	7.18364	6.9786	3.67103
TCONS_00000859	XLOC_000515	1.54145	2.67942	0.850412	2.55872	1.46864	3.83429	1.41992	1.23314	1.89325	1.22068	0.238676	2.30278
TCONS_00000860	XLOC_000515	0.35387	1.59103e-07	1.47346	0.0361619	0	0	3.39697e-10	0.0123789	0	0	0	1.49164e-05
TCONS_00000861	XLOC_000515	2.63221e-06	0.470791	3.51465e-05	1.83562	0.24575	0	0	0.766942	0	0.278664	0.134622	0.442457
TCONS_00000862	XLOC_000515	0.0414512	4.26147	4.4124	2.24243	3.78432	2.09791	4.93852	1.75545	1.73201	0.644201	0.0761706	0.0389406
TCONS_00000863	XLOC_000515	2.49308	4.11628	1.52097	0.331516	1.03986	0.210894	1.01714	0.40594	0.555415	0.161306	2.36129	0.0274806
TCONS_00000864	XLOC_000515	2.58071	0.233289	3.44705	3.67557	4.67407	4.62554	3.94571	4.56201	3.4595	5.32581	5.05089	3.46705
TCONS_00000865	XLOC_000515	1.8367	0.866572	0.910181	2.66896	1.74397	4.03103	1.64544	2.02015	2.40815	1.89867	0.708846	2.64299
TCONS_00000866	XLOC_000515	1.8367	0.866572	0.910181	2.66896	1.74397	4.03103	1.64544	2.02015	2.40815	1.89867	0.708846	2.64299
TCONS_00000867	XLOC_000515	0	1.55683e-09	0	0	0	0	0	0	0	0	0	0
TCONS_00000868	XLOC_000515	0.912179	0.601222	1.80927	3.84324e-09	1.06008	1.20235	0.775642	0.833591	0.738365	1.49939	0.667026	0.464354
TCONS_00000869	XLOC_000515	0	6.12001e-05	1.5106e-09	1.28085e-06	5.17608e-05	3.2574e-06	1.99032e-06	0	0	0	1.07181e-06	0
TCONS_00000870	XLOC_000515	1.4014e-05	0.990022	1.60031	0.499195	0.981637	0.15705	0.0005321	0.0640365	0.482441	0.347551	0.137271	0.128916
TCONS_00000871	XLOC_000515	0.104077	0.536942	1.98406	2.90733	2.9927	2.71481	0.286255	2.01173	3.23624	2.97153	2.14594	2.05667
TCONS_00000872	XLOC_000516	4.06867e-09	0	0	1.44652e-06	1.14734e-05	0	1.1668	0	8.44848e-05	0	0.886181	0
TCONS_00000873	XLOC_000516	3.33092	3.75196	6.25593	5.88136	2.48485	3.43769	3.08438	3.09861	3.36261	3.30757	2.8858	3.74984
TCONS_00000874	XLOC_000517	0	0.715279	0	0.198925	0.56474	0.694114	0.281263	0.13203	0.146225	0.66691	0.644087	0.169459
TCONS_00000875	XLOC_000517	0.811966	0.426543	0.139483	0.40832	0.574562	0.390815	0.540653	0.695836	0.454205	0.306957	0.141491	0.289019
TCONS_00000876	XLOC_000518	13.0539	11.8558	11.1017	9.059	9.56685	7.28705	13.2982	10.7302	11.2548	12.4544	13.7986	11.7792
TCONS_00000877	XLOC_000518	12.2004	10.8105	8.61329	9.28729	11.2015	10.3077	5.62157	6.10465	6.08419	6.37848	5.88477	7.32504
TCONS_00000878	XLOC_000519	3.51089	3.94336	15.2215	14.0816	18.0539	24.9335	9.96096	12.3857	7.28106	5.78304	5.69839	5.93958
TCONS_00000879	XLOC_000519	3.60598	3.50515	15.2469	14.3523	20.3992	23.0987	9.03414	10.31	5.26588	6.28388	7.57109	6.23859
TCONS_00000880	XLOC_000520	15.1677	11.1727	22.8674	22.1547	21.4997	16.0865	14.1616	16.9245	8.49802	9.1889	13.2363	10.8149
TCONS_00000881	XLOC_000520	561.937	569.177	2942.92	2737.97	1192.23	1262.93	516.789	598.263	207.208	243.109	373.068	267.908
TCONS_00000882	XLOC_000521	0.354308	2.14301	0	0	0	0	0	0	0	0	0.400317	0
TCONS_00000883	XLOC_000521	0.954637	0	0	0	0	0	0	0	0	0	0	0
TCONS_00000884	XLOC_000521	0.354308	0	0	0	0	0	0	0	0	0	0	0
TCONS_00000885	XLOC_000521	1.01653e-08	0	0	0	0	0	0	0	0	0.107284	0	0
TCONS_00000886	XLOC_000521	0.00306988	1.65255e-06	0	0	0.797529	0.162833	0	0	0	0	0	0
TCONS_00000887	XLOC_000521	0.618902	0.00166243	0.143791	0	0	0.133337	0.122972	0.118701	0	0.104726	0.096547	0.188237
TCONS_00000888	XLOC_000521	0.618902	1.22751	0.143791	0	0	0.133337	0.122972	0.118701	0	0.104726	0.096547	0.188237
TCONS_00000889	XLOC_000521	0.06058	3.30403	0.982106	0.95873	0.000168244	0.360987	0.790013	0.564043	1.02679	0.667588	0.866477	1.04041
TCONS_00000890	XLOC_000521	4.36575	2.12943	0	0	5.59431e-08	0	0	0	0	0	0	0.0376934
TCONS_00000891	XLOC_000522	4.74668	3.14073	8.38077	3.35057	23.8784	25.3103	29.0309	12.8884	4.43426	8.52725	2.10079	6.5736
TCONS_00000892	XLOC_000522	4.46399	5.38052	30.9405	41.92	57.2133	72.9699	16.4548	18.2561	11.8256	12.8621	19.0724	12.9472
TCONS_00000893	XLOC_000522	1.22249	2.8045	0.171439	1.86681	0.477779	1.74015	1.48492	1.44006	3.23639	0.90752	0.585783	0.687097
TCONS_00000894	XLOC_000522	0.332587	0.154198	0.412046	0.448638	0.494652	0.422353	0.305034	0.176349	0.323083	0.660102	0.655773	0.46
TCONS_00000895	XLOC_000522	0	0	0.000526913	0.00119631	0	1.57322e-07	0	7.93489e-07	0	0.000398842	0	0
TCONS_00000896	XLOC_000522	0.0759916	0.24037	0.194916	0.376427	0.0885601	0.271322	0	0.220733	0.140623	0.141504	0	0.0670625
TCONS_00000897	XLOC_000523	0	0	0.167689	0	0	0	0.0273547	0	0.216404	0	0.102135	0.149309
TCONS_00000898	XLOC_000523	0.043189	0	0.0107845	0	0.249156	0.254212	0.0507957	0	0	0.199665	0.26508	0.0552031
TCONS_00000899	XLOC_000524	0	0	0.272362	0.184711	0.164605	0.25256	0.12549	0.0224838	0.104202	0.372389	0.201162	0.168098
TCONS_00000900	XLOC_000525	0	0	0	0	0	0	0	0	0	0	0	0
TCONS_00000901	XLOC_000526	0	0.0336477	0.0664929	0.0644205	0	0.0308293	0	0.0274454	0	0.0968568	0.044646	0.0911966
TCONS_00000902	XLOC_000527	0	0	0	0	0	0	0	0	0	0	0	0
TCONS_00000903	XLOC_000528	0	0	0	0	0	0	0	0	0	0	0	0
TCONS_00000904	XLOC_000529	1.77825	0	0	0	0	0	0	0	0	0	0	0
TCONS_00000905	XLOC_000530	0.0981063	0.0490376	0	0	0	0.0449302	0	0	0	0.0352894	0	0.0332271
TCONS_00000906	XLOC_000531	0.746615	0.800713	0.894695	0	3.93313	2.28223	3.89347	1.34122	3.50812	2.23737	2.05462	0.561437
TCONS_00000907	XLOC_000532	11.7731	9.55223	11.5405	8.14625	3.15204	6.00342	7.55604	6.68842	9.0911	6.26489	10.4444	6.40191
TCONS_00000908	XLOC_000533	0	0	14.3723	0	9.79669	6.66368	15.3642	29.6613	7.74452	15.7015	2.41253	9.85595
TCONS_00000909	XLOC_000534	0.654528	0.893881	1.01038	0.719116	0.659508	0.641186	0.860562	0.788625	1.03798	0.944191	0.924607	0.989821
TCONS_00000910	XLOC_000535	0.0391882	0.195879	0.154834	0.225013	0.211082	0.215366	0.298134	0.0958634	0.139144	0.197347	0.0780267	0.0796346
TCONS_00000911	XLOC_000536	0	0	0	0	0	0	0	0	0	0	0	0
TCONS_00000912	XLOC_000537	0	0.0664631	0	0.694262	0	0	0.206982	0	0	0	0	0.395102
TCONS_00000913	XLOC_000538	9.27498	9.10345	0.166572	0	0.0756947	0.0772309	0.48716	0.343769	0	0.121319	0.335529	0.114229
TCONS_00000914	XLOC_000539	49.4946	42.2665	1.76245	1.33632	3.41255	2.70018	1.57281	2.97312	2.31231	1.50688	3.24144	3.78352
TCONS_00000915	XLOC_000540	5.098	8.03556	5.02239	4.29512	3.73869	4.54301	5.31785	5.12991	3.75425	4.28009	4.20365	5.46964
TCONS_00000916	XLOC_000541	4.7758	4.70846	5.75373	3.32387	13.6416	13.9185	9.88475	7.2264	7.84688	10.1687	11.1604	8.40124
TCONS_00000917	XLOC_000542	3.9009	6.34873	5.27796	4.04363	5.43552	3.06997	5.74908	5.74313	2.73733	3.8398	2.4266	5.20203
TCONS_00000918	XLOC_000543	0.980482	0.763393	0.980759	0	0.332396	0.767922	0.240664	0.584527	0	0.670331	0.198055	0.44175
TCONS_00000919	XLOC_000544	0.257115	0.257033	0.761905	0.738159	0.692459	0.235504	0	0.838618	0.182468	0.184971	0.341049	0.174162
TCONS_00000920	XLOC_000545	0	0	0	0	0	0	0	0	0	0	0	0
TCONS_00000921	XLOC_000546	1.03117	0.960875	1.55194	0.702909	1.16847	1.5138	1.98739	1.46764	1.3567	1.34208	0.868582	1.38736
TCONS_00000922	XLOC_000547	0.191205	0.3984	0.10197	0	0	0	0.107287	0	0.0957865	0	0.132376	0.0790686
TCONS_00000923	XLOC_000548	4.46075	4.32818	5.76688	4.45716	4.94679	4.68667	5.26441	5.13508	7.40212	5.80472	6.35201	6.17645
TCONS_00000924	XLOC_000549	0.845938	1.69642	1.11746	0.655946	2.26775	1.55433	1.91134	1.38372	1.29863	0.813874	1.23697	0.766312
TCONS_00000925	XLOC_000550	0.454079	0.453935	0	0	0	0.415913	1.15075	0	0.644498	0.32667	0.602311	0.615159
TCONS_00000926	XLOC_000551	0	0	0	0	0	0	0	0	0	0	0	0
TCONS_00000927	XLOC_000552	0	0	0	0	0	0	0	0	0	0	0	0
TCONS_00000928	XLOC_000553	0	0	0	0	0	0	0	0	0.235739	0	0.220308	0
TCONS_00000929	XLOC_000554	0	0	0	0	0	0	0	0	0	0	0	0
TCONS_00000930	XLOC_000555	5.41732	3.44629	5.83748	7.06943	5.74752	5.26272	7.48844	6.69295	8.9706	6.14117	8.27454	8.33984
TCONS_00000931	XLOC_000556	0	0	0	0	0	0	0	0	0	0	0	0
TCONS_00000932	XLOC_000557	0	0	0	0	0	0	0	0	0	0	0.246812	0
TCONS_00000933	XLOC_000558	0.919027	1.03142	0.220393	0	0.200333	0.207004	0.63358	0.553049	0.158292	0	0.29648	0.151724
TCONS_00000934	XLOC_000559	1.34071	1.56367	1.10359	0.427677	1.2036	0.614012	2.26513	0.911027	2.37868	2.0898	2.66757	3.02719
TCONS_00000935	XLOC_000560	0	0	0	0	0	0	0	0	0	0	0	0
TCONS_00000936	XLOC_000561	1.71561	3.8085	0	2.32659	2.17089	2.26209	1.94495	1.87957	3.98531	0	3.37933	4.58858
TCONS_00000937	XLOC_000562	0	0	0	0.393072	0	0	0.346975	0	0.291495	0	0	0
TCONS_00000938	XLOC_000563	0	0.249894	0	0.478436	0	0.686887	0.422328	0	0.3548	0	0.165788	0.338648
TCONS_00000939	XLOC_000564	3.82479	2.82217	0.134928	0.174297	0.327012	0.417061	0.307713	0.259898	0.193883	0.0982714	0.543576	0.277585
TCONS_00000940	XLOC_000565	1.2968	0.864261	0.0346892	0	0	0.395935	1.41267	0.352476	0.30677	0.621956	0	0.58561
TCONS_00000941	XLOC_000566	0	0	0	0	0	0	0	0	0	0	0	0
TCONS_00000942	XLOC_000567	34.7449	44.6956	4.93263	4.65383	6.87884	6.9973	9.0717	6.97165	6.32321	6.28703	7.61201	5.94976
TCONS_00000943	XLOC_000568	0	0	0	0	0	0	0	0	0	0	0	0.0798242
TCONS_00000944	XLOC_000569	0.557012	0.85825	0	0	0	0	0	0	0	0	0	0
TCONS_00000945	XLOC_000569	0	0	0	0	0	0	0	0	0	0	0	0
TCONS_00000946	XLOC_000570	6.93749	6.13006	23.1587	26.8212	31.8318	34.1685	16.2445	15.1091	16.0582	10.6144	10.4495	11.3034
TCONS_00000947	XLOC_000571	0	0	1.87264e-09	0	0	0	0	0	2.12997e-09	0	1.01645e-07	0
TCONS_00000948	XLOC_000571	0.704571	1.33095	1.2151	2.09011	3.69516	2.3932	0.000568791	1.21363	1.78598	1.74891	3.04821	2.57437
TCONS_00000949	XLOC_000571	0.704571	1.33095	1.2151	2.09011	3.69516	2.3932	0.000568791	1.21363	1.78598	1.74891	3.04821	2.57437
TCONS_00000950	XLOC_000571	0	0	0	0	0	1.73762e-09	0	0	0	0	2.23331e-10	0
TCONS_00000951	XLOC_000571	0.338394	0.000714561	4.35489e-08	2.88461e-07	7.88333e-07	0.0115804	3.59152	7.40674e-06	2.98133e-07	7.41922e-06	0.00287743	0.000249834
TCONS_00000952	XLOC_000571	0	0	0	0	0	0	0	0.192844	0	0	9.06275e-09	0.512903
TCONS_00000953	XLOC_000571	0	0	0	0	0	0	0	0	0	0	0	0
TCONS_00000954	XLOC_000571	0	0	0	0	0	0	0	0.234817	0	0	1.09435e-08	0.0479505
TCONS_00000955	XLOC_000571	3.85718e-05	1.8939	3.52126e-05	0.00826489	0.0165047	0.0195914	0.226687	0.00390376	0.00035616	0.000101772	5.22053e-06	0.257814
TCONS_00000956	XLOC_000571	4.03391	4.61796	4.31228	7.70196	5.2927	4.77031	5.13207	4.07614	2.6059	5.28976	3.71902	4.14347
TCONS_00000957	XLOC_000571	6.4791e-10	0	1.18638e-08	0	0	3.75296e-10	0	0	2.3649e-08	0	5.16109e-07	0
TCONS_00000958	XLOC_000571	0	0	1.03259e-09	0	0	0	0	0	2.3649e-08	0	2.80802e-09	0
TCONS_00000959	XLOC_000571	2.87586	0.00665113	0.32659	2.36929	0.000199092	0.00350862	0.0278535	3.33877	0.00362427	0.0197221	5.41482	0.000307274
TCONS_00000960	XLOC_000571	0.669755	0.101019	0.529715	0.212085	0.226518	0.781812	1.14126	1.18255	3.15117	0.0347127	0.0327354	1.01389
TCONS_00000961	XLOC_000571	0.821422	0.121813	0.647723	0.25551	0.27417	0.957704	1.40159	1.43132	3.81065	0.0425159	0.0393023	1.24928
TCONS_00000962	XLOC_000571	6.06755	6.71456	6.44747	1.8019	7.75356	7.15799	7.74019	5.97135	3.81065	7.93506	5.36066	6.29056
TCONS_00000963	XLOC_000571	0	0	6.7129e-10	0	0	0	0	0	1.38496e-09	0	7.55691e-10	0
TCONS_00000964	XLOC_000571	0.58776	0.000173445	0.0490732	0.490086	1.01182e-05	0.00069985	0.00758332	0.494044	0.00235896	0.000157119	0.0580157	9.19175e-05
TCONS_00000965	XLOC_000571	1.00746	0.146891	0.792046	0.307836	0.331857	1.1732	1.72136	0.726632	2.05739	0.0520749	0.0471879	1.53937
TCONS_00000966	XLOC_000571	0.215858	0.23699	4.39088	4.41406	0.0478815	2.74963	0.0547999	1.64716	1.08847	0.250531	1.86608	0.133917
TCONS_00000967	XLOC_000571	12.8891	14.9098	12.1964	8.72475	13.2722	15.4388	9.64661	10.4881	16.5468	16.1076	13.2513	14.713
TCONS_00000968	XLOC_000572	0	1.89199e-09	4.53855e-10	2.03323e-09	0.321289	0.221836	0	1.62955e-09	0.174778	0	1.21642e-09	0
TCONS_00000969	XLOC_000572	0	1.89199e-09	4.53855e-10	2.03323e-09	0.321289	0.221836	0	1.62955e-09	0.174778	0	1.21642e-09	0
TCONS_00000970	XLOC_000572	0	1.89199e-09	4.53855e-10	2.03323e-09	0.321289	0.221836	0	1.62955e-09	0.174778	0	1.21642e-09	0
TCONS_00000971	XLOC_000572	0	1.89199e-09	4.53855e-10	2.03323e-09	0.321289	0.221836	0	1.62955e-09	0.174778	0	1.21642e-09	0
TCONS_00000972	XLOC_000572	3.31441e-08	0.680549	0.708663	0.665263	0.00328639	1.61749e-09	0.58677	0.869764	1.36958e-08	2.57092e-08	0.276826	2.94837e-09
TCONS_00000973	XLOC_000572	3.31441e-08	0.680549	0.708663	0.665263	0.00328639	1.61749e-09	0.58677	0.869764	1.36958e-08	2.57092e-08	0.276826	2.94837e-09
TCONS_00000974	XLOC_000572	3.31441e-08	0.680549	0.708663	0.665263	0.00328639	1.61749e-09	0.58677	0.869764	1.36958e-08	2.57092e-08	0.276826	2.94837e-09
TCONS_00000975	XLOC_000572	5.49335	0.16554	2.35501	0.931196	3.23028	0.239861	1.09021	0.00308374	0.614225	3.75982	0.39465	0.752022
TCONS_00000976	XLOC_000572	5.49335	0.16554	2.35501	0.931196	3.23028	0.239861	1.09021	0.00308374	0.614225	3.75982	0.39465	0.752022
TCONS_00000977	XLOC_000572	3.41421e-05	0.000180779	8.57318e-09	0.00105082	1.68629	0.000306949	0.000611261	0.161582	0.000604622	2.1172e-05	0.000504988	0.000373883
TCONS_00000978	XLOC_000572	27.3527	35.9624	36.9061	35.2191	44.6265	49.2236	48.5548	48.5915	34.2774	37.5592	38.2325	39.4078
TCONS_00000979	XLOC_000572	0.132797	0.353987	2.95315e-05	1.98399	0.00156137	1.13726	2.51109	0.00669537	1.32873	0.0779688	0.829137	1.7555
TCONS_00000980	XLOC_000572	0.132797	0.353987	2.95315e-05	1.98399	0.00156137	1.13726	2.51109	0.00669537	1.32873	0.0779688	0.829137	1.7555
TCONS_00000981	XLOC_000572	0.132797	0.353987	2.95315e-05	1.98399	0.00156137	1.13726	2.51109	0.00669537	1.32873	0.0779688	0.829137	1.7555
TCONS_00000982	XLOC_000572	5.1224	8.10073	7.03404	7.10469	9.73682	12.2943	9.65301	10.9929	6.01258	6.79973	6.51547	5.87173
TCONS_00000983	XLOC_000572	5.1224	8.10073	7.03404	7.10469	9.73682	12.2943	9.65301	10.9929	6.01258	6.79973	6.51547	5.87173
TCONS_00000984	XLOC_000572	13.9939	16.5764	20.9043	16.2671	20.1091	21.1543	18.1226	16.5961	16.2974	19.1216	8.36753	14.3181
TCONS_00000985	XLOC_000573	314.319	345.278	237.889	207.342	241.568	231.597	257.628	204.725	255.111	251.249	254.1	251.082
TCONS_00000986	XLOC_000574	0	0	0	0	0	0	0	0.146758	0	0	0	0
TCONS_00000987	XLOC_000574	0	0.319219	0	0	0	0	0	0	0	0.229723	0	0
TCONS_00000988	XLOC_000575	15.9371	17.8047	2.44807	2.03451	3.9929	3.18707	3.04511	4.36345	5.10201	3.76512	4.16993	3.58156
TCONS_00000989	XLOC_000575	33.9167	30.9965	5.44998	5.32765	2.65177	2.96316	7.02872	5.44218	4.78147	4.90653	5.7873	6.55468
TCONS_00000990	XLOC_000576	4.46339	3.77761	6.60202	7.18849	3.79999	4.08452	3.49922	4.84155	4.75359	4.42094	3.97961	3.01197
TCONS_00000991	XLOC_000577	62.4763	65.2744	69.1061	65.5086	69.1172	70.1127	74.4994	65.9688	56.0633	58.7569	92.1394	95.6996
TCONS_00000992	XLOC_000577	0.168636	0	0	0.136132	0	0	0.123433	0.118843	0	0.337764	0.283283	0.0981143
TCONS_00000993	XLOC_000578	9.07092	7.48695	6.89223	6.09871	7.14098	5.92246	7.30897	7.51032	9.54057	9.2364	9.4097	10.6187
TCONS_00000994	XLOC_000579	39.2356	40.7061	34.5374	35.7869	52.7507	45.1197	57.1449	48.1269	54.2244	55.8427	48.9527	55.8504
TCONS_00000995	XLOC_000579	0	0	3.02707	0	0	0	0	0.849524	0	0	0	0
TCONS_00000996	XLOC_000580	0	0	0	0.137704	0.282828	0.287405	0	0	0.267701	0.106108	0	0
TCONS_00000997	XLOC_000580	0.603983	0	0	0	0	0	0	0.107062	0	0	0	0
TCONS_00000998	XLOC_000580	0	0	0	0	0	0	0	0	0	0	0	0
TCONS_00000999	XLOC_000581	8.79743e-08	0.63436	3.96962e-08	1.4269e-07	4.70946e-08	1.97496e-08	1.68531e-08	3.50786e-08	9.05368e-08	2.50204e-08	2.42767e-07	2.93329e-08
TCONS_00001000	XLOC_000581	8.79743e-08	0.63436	3.96962e-08	1.4269e-07	4.70946e-08	1.97496e-08	1.68531e-08	3.50786e-08	9.05368e-08	2.50204e-08	2.42767e-07	2.93329e-08
TCONS_00001001	XLOC_000581	8.79743e-08	0.63436	3.96962e-08	1.4269e-07	4.70946e-08	1.97496e-08	1.68531e-08	3.50786e-08	9.05368e-08	2.50204e-08	2.42767e-07	2.93329e-08
TCONS_00001002	XLOC_000581	0	0	0	0	0	0	0	0	0	0	0	0
TCONS_00001003	XLOC_000581	0	0	0	0	0	0	0.536242	1.55225	0.450323	0	0.420846	0
TCONS_00001004	XLOC_000581	0	0	0.0105528	0	0.00664532	0.00587111	0.00586962	0	0	2.76457e-08	2.28644e-07	2.74462e-05
TCONS_00001005	XLOC_000581	8.19097	5.74284	2.82243	2.67055	1.33872	1.65081	1.77156	0.997151	2.37363	2.06337	3.33216	4.14808
TCONS_00001006	XLOC_000582	66.5084	76.6924	52.3179	54.0424	54.2759	53.394	43.9881	50.9526	64.4937	64.5624	73.7672	72.1976
TCONS_00001007	XLOC_000583	25.7147	24.8023	8.67471	7.70199	3.42738	4.40412	1.94007	3.60828	1.06566	1.23675	1.59769	1.37414
TCONS_00001008	XLOC_000583	15.842	15.0237	6.37258	8.41072	4.95998	4.24809	4.19887	3.28035	3.08123	2.86988	1.93826	2.40789
TCONS_00001009	XLOC_000584	4.62316	7.64072	2.43074	3.81666	2.45691	3.52467	2.28668	4.26616	1.86455	1.01164	2.53871	3.21554
TCONS_00001010	XLOC_000584	9.90677	8.27744	4.2538	2.46778	0.818968	0	0.571671	0.711027	2.79683	2.30507	4.9517	3.93011
TCONS_00001011	XLOC_000584	0	0	0	1.1189	0	0	0	0	0	0.717169	0.12637	0
TCONS_00001012	XLOC_000585	5.45411	5.15066	10.7379	10.5967	7.59313	11.8851	6.90023	5.79884	7.45468	7.94208	6.5036	5.12446
TCONS_00001013	XLOC_000585	5.45411	5.15066	10.7379	10.5967	7.59313	11.8851	6.90023	5.79884	7.45468	7.94208	6.5036	5.12446
TCONS_00001014	XLOC_000585	0.806096	0.0841274	0.469122	2.96259	0.235838	0.777388	0.238579	0.0940309	0.6304	0.0320987	5.53453e-05	0.000236308
TCONS_00001015	XLOC_000585	0.806096	0.0841274	0.469122	2.96259	0.235838	0.777388	0.238579	0.0940309	0.6304	0.0320987	5.53453e-05	0.000236308
TCONS_00001016	XLOC_000585	0.806096	0.0841274	0.469122	2.96259	0.235838	0.777388	0.238579	0.0940309	0.6304	0.0320987	5.53453e-05	0.000236308
TCONS_00001017	XLOC_000585	50.0357	49.3249	52.3756	45.2263	58.9526	46.1862	51.338	51.3555	43.5626	54.4862	55.5952	61.2206
TCONS_00001018	XLOC_000585	28.1174	27.1594	44.4948	37.2562	37.9017	45.5908	32.4082	31.7451	31.1194	30.9198	36.3927	37.7697
TCONS_00001019	XLOC_000585	0	0	0	0	0	0	0	0	0	0	0	0
TCONS_00001020	XLOC_000585	0.371237	0.439433	0.447052	0.394466	0.348567	0.745145	0	0	0.28363	0.870908	0.229227	0.403754
TCONS_00001021	XLOC_000586	114.379	120.12	102.754	95.8311	78.4669	88.6563	77.2103	75.1247	80.9102	77.4786	68.0794	74.6504
TCONS_00001022	XLOC_000586	113.042	135.28	100.665	105.075	78.9888	86.4143	89.3484	72.7381	82.4407	85.9379	74.179	68.9109
TCONS_00001023	XLOC_000587	50.8543	51.4281	36.107	35.3396	40.3073	40.6641	46.707	38.8442	32.4402	36.7577	28.7027	32.1096
TCONS_00001024	XLOC_000587	0	0	0	0	0	0	0	0	0	0	0	0
TCONS_00001026	XLOC_000587	0	0	0	0	0	0	0	0	0	0	0	0
TCONS_00001027	XLOC_000587	3.05108	4.64335	3.57626	3.40903	5.39277	3.23673	5.96547	4.8604	3.77972	3.63362	4.07858	2.92785
TCONS_00001028	XLOC_000587	0	0	0	0	0	0	0	0	0	0	0	0
TCONS_00001029	XLOC_000587	0	0	0	0	0	0	0.000202883	0	0.000749993	0	0	0.590132
TCONS_00001030	XLOC_000587	0	2.93886e-07	0	0	0	0	0.815258	0	0.718032	0	0	3.12358e-08
TCONS_00001031	XLOC_000587	5.4137	5.54375	7.34953	6.26618	0.837717	6.38621	0.168025	7.7264	4.07883	5.47625	5.14829	5.13732
TCONS_00001032	XLOC_000587	3.27843	3.49995	4.48366	3.9648	10.4289	3.87879	4.89516	4.83319	2.55713	3.32734	3.28521	3.07573
TCONS_00001025	XLOC_000588	0	0	0	0	1.67409	0	0	0	0.508133	0.505881	0	0.474212
TCONS_00001033	XLOC_000589	0	0	0	0	0	0	0.263788	0	0.329662	0	0	0
TCONS_00001034	XLOC_000589	0.38041	0.806048	0.175624	0.498581	0.159616	0.087109	0	0.424826	1.11067	0.877532	0.981762	1.42843
TCONS_00001035	XLOC_000589	0.661583	0.49603	0.0816857	0	0.0742402	0.151494	0	0	0.22349	0.0594937	0.0548471	0.336102
TCONS_00001036	XLOC_000589	0	0	0	0	0	0	0	0	0	0	0	0
TCONS_00001037	XLOC_000590	1.61982	2.51893	0.622222	0.344474	0.242361	0	1.14029	0.293516	0.702503	1.81272	1.13399	0.670523
TCONS_00001038	XLOC_000591	224.751	228.953	0	0	0.201967	0	0	0	0.15966	0	2.08892	0.91435
TCONS_00001039	XLOC_000592	0	0.0812802	0	0.550758	1.05765	0	0	0	0	0	0	0.28437
TCONS_00001040	XLOC_000593	147.648	234.273	1.11975	1.16788	0	0	0	0	0	0	1.6545	0.613222
TCONS_00001041	XLOC_000593	0	0	0	0	0	0	0	0	0	0	0	0
TCONS_00001042	XLOC_000593	70.2879	60.3412	0.257088	0.16605	0	0	0.0771411	0.148924	0.453646	0.394173	0.194431	0.330964
TCONS_00001043	XLOC_000593	15.6869	16.5012	0	0	0	0	0	0	0	0.311927	0	0
TCONS_00001044	XLOC_000593	270.933	255.5	0	0	0.694262	0	1.22944	0.481677	1.74168	1.18304	0.83138	4.38365
TCONS_00001045	XLOC_000593	0	0	0	0	0	0	0	0	0	0	0	0
TCONS_00001048	XLOC_000593	0	0	0	0	0	0	0	0	0	0	0	0
TCONS_00001046	XLOC_000594	142.346	149.501	0	0	0.766895	0.0449974	0	0	0.442772	0	0	0
TCONS_00001047	XLOC_000594	142.346	149.501	0	0	0.766895	0.0449974	0	0	0.442772	0	0	0
TCONS_00001049	XLOC_000594	0	0	0.497681	0.497471	0	0	0.922368	1.13257	0	0.80015	0.612309	0.663767
TCONS_00001050	XLOC_000595	0	0	0	0	0	0	0	0	0	0	0	0
TCONS_00001051	XLOC_000596	12.2269	8.31168	4.83092	5.38241	3.95153	4.26331	5.49485	6.42067	11.7315	11.9628	16.6725	15.0735
TCONS_00001052	XLOC_000596	0	8.89555e-07	0	0	0	0.366152	0	1.11894e-08	0	0	0	0
TCONS_00001053	XLOC_000597	4.66529	5.67828	7.97681	9.01678	5.53587	5.55812	6.2477	6.12986	4.41523	4.8782	3.9992	3.98155
TCONS_00001054	XLOC_000597	47.9557	46.3254	40.3448	38.0698	36.5542	38.9836	39.76	37.715	44.475	39.9757	44.1562	43.7714
TCONS_00001055	XLOC_000598	2.45331	0.912628	1.09214	2.89022	2.55498	3.73002	2.30772	2.29711	4.08037	2.88225	2.78866	4.44753
TCONS_00001056	XLOC_000598	0	3.93815	0.101127	0	0.335227	2.27435	0.452863	2.8839	6.22077	4.452	4.77037	3.8604
TCONS_00001057	XLOC_000598	9.96403	5.26502	12.9248	7.53794	9.70994	5.47628	7.98707	5.16699	9.21523	7.40037	13.6888	13.206
TCONS_00001058	XLOC_000598	0.987453	1.93861	0.149181	0.919744	0.140611	0.453155	0.460482	0.90127	0.845838	0.499805	0.33034	0.221039
TCONS_00001059	XLOC_000599	4.96552	5.38642	5.18324	5.48027	4.76143	4.96142	7.0364	8.06302	6.98762	7.31317	9.84245	8.26302
TCONS_00001060	XLOC_000600	17.4803	18.5546	10.7995	10.7136	7.96381	8.93498	14.0751	16.9228	14.287	15.3543	19.1702	22.1956
TCONS_00001061	XLOC_000601	2.21318	4.42495	2.38482	3.2732	37.9304	26.1687	19.7155	21.8198	18.2765	21.4221	55.1103	61.0558
TCONS_00001062	XLOC_000602	24.4323	19.0072	25.0788	23.0683	21.4719	27.9553	21.0335	18.966	20.5795	24.0501	20.8574	20.4058
TCONS_00001063	XLOC_000602	12.0656	21.5021	14.1662	18.7823	14.435	14.0707	6.11617	19.9652	11.563	6.31426	11.2052	12.9247
TCONS_00001064	XLOC_000603	24.9423	29.8616	79.456	68.4997	96.2014	98.4537	72.4703	63.504	53.513	60.3503	50.8401	47.0005
TCONS_00001065	XLOC_000603	7.75217	5.96132	5.89023	8.48925	23.0194	13.655	13.0068	8.75245	8.74871	6.34479	8.88891	8.33918
TCONS_00001066	XLOC_000604	3.4738	4.46917	5.50039	4.76929	8.5344	7.17116	6.02438	5.93102	4.84866	5.53305	6.47692	5.78507
TCONS_00001067	XLOC_000604	36.5276	42.8157	0	0	0	0	0	0	0	0	0	0
TCONS_00001068	XLOC_000604	0	0	0	0	0	0	0	0	0	0	0	0
TCONS_00001069	XLOC_000604	1616.44	1534.09	0	0	0	0	0	0	0.82083	0	89.0137	74.985
TCONS_00001070	XLOC_000605	50.2531	46.7815	46.2352	43.6368	31.6203	30.3301	42.5271	40.4063	55.2972	47.7254	48.3732	36.4546
TCONS_00001071	XLOC_000605	0	0	0	0	0	0	0	0	0	0	0	0
TCONS_00001072	XLOC_000605	0	0	0.355607	0	0	0	0.154242	0	0	0.51573	0	0
TCONS_00001073	XLOC_000606	126.352	123.749	98.8726	104.144	76.4281	84.3242	68.0554	80.4346	62.1388	59.3533	80.9967	74.4661
TCONS_00001074	XLOC_000607	23.9222	22.1515	46.865	45.5238	57.3322	55.3415	47.5341	43.9935	32.6492	35.1879	31.0458	28.4478
TCONS_00001075	XLOC_000607	4.61947	7.88416	2.24829	1.81089	2.76623	2.10202	2.82231	1.65465	3.54272	0.400666	2.77952	3.09485
TCONS_00001076	XLOC_000608	0	0.356614	0.0456917	0.0953264	0.0724688	0.234246	0.0675836	0.0602114	0.044478	0.200503	0.123729	0.119663
TCONS_00001077	XLOC_000609	22.7076	23.4769	58.8655	52.5294	49.0347	49.7028	58.3893	49.3921	48.8475	46.086	32.9696	37.1166
TCONS_00001078	XLOC_000610	12.783	14.2812	8.75883	8.14728	5.23244	7.29329	8.12171	7.95479	10.409	11.057	12.9386	14.4391
TCONS_00001079	XLOC_000610	4.82875	2.23028	0	0.770165	1.54375	0.863684	0.679845	2.88591	2.93436	2.76216	1.50726	0.545141
TCONS_00001080	XLOC_000610	0	0.987861	0	0	0.623703	0.610613	0	0.395267	0.492483	0.711692	0.627759	0
TCONS_00001081	XLOC_000611	9.67389	0.00404159	0	0	0.169998	0	0	0.164296	0	0	0	0
TCONS_00001082	XLOC_000611	2.54844	7.52141	0.830431	0.166505	0	0.526294	0	0	0.561072	0.175201	6.31057	6.94464
TCONS_00001083	XLOC_000611	2.32248e-07	0	0	0	0.605152	0.846239	0.000384988	0.780535	1.3559	5.26673e-09	1.62578	0
TCONS_00001084	XLOC_000611	0	0	0	0	1.63382	0.90604	1.6057	0.000186746	0.000342313	0.847222	0.206245	2.56061e-09
TCONS_00001085	XLOC_000611	0	0	0	0	0	0	0	0	0	0	0	0
TCONS_00001086	XLOC_000611	0.0124713	0	8.34089e-08	0	0	0	0	0	4.6329e-05	0	0.00464798	0
TCONS_00001087	XLOC_000611	0.0124713	0	8.34089e-08	0	0	0	0	0	4.6329e-05	0	0.00464798	0
TCONS_00001088	XLOC_000611	0.450979	0.417075	2.65307e-05	0.0448538	5.32976e-05	0.0112946	1.04132e-07	0.0931201	0.00369062	0.00219061	1.17873	5.85396
TCONS_00001089	XLOC_000611	0.35762	18.5173	40.2454	45.661	79.0679	84.1997	32.1985	29.4556	22.6805	19.9462	15.9343	16.8641
TCONS_00001090	XLOC_000611	25.0926	31.8258	8.74404	7.5132	6.66541	25.2809	5.82697	3.13258	10.1683	8.83562	14.0387	4.12448
TCONS_00001091	XLOC_000611	20.2597	1.25245	21.959	11.242	59.4556	41.5532	9.50046	17.3342	3.95233	9.01989	8.00306	10.8484
TCONS_00001092	XLOC_000612	0	0	0	0	0	0	0	0	0	0	0	0
TCONS_00001093	XLOC_000612	0	0	0	0	0	0	0	0	0	0	0	0
TCONS_00001094	XLOC_000613	3.73582	4.91355	20.453	25.5938	16.8809	19.5077	14.8655	12.1077	11.7637	21.0738	10.3661	4.17427
TCONS_00001095	XLOC_000613	15.2981	13.2877	53.2339	45.9488	58.7972	57.2391	44.4042	48.5505	42.7082	31.8344	29.8743	32.4048
TCONS_00001096	XLOC_000614	0	5.57452	0	7.11517	1.66867	0	0	0	0	0	1.23277	1.25907
TCONS_00001097	XLOC_000615	26.7551	27.8424	22.3397	22.5426	59.2035	43.4802	75.2305	58.7547	44.9602	47.9749	25.4448	30.8516
TCONS_00001098	XLOC_000616	19.5701	21.0648	24.2399	26.6553	51.172	31.9144	45.3092	40.9917	21.2735	23.9118	13.5287	14.5537
TCONS_00001099	XLOC_000617	22.4772	21.959	25.5488	22.4083	24.4999	23.8049	27.7066	26.7606	25.9373	26.4687	33.2536	27.8418
TCONS_00001100	XLOC_000618	55.7777	53.1781	51.6608	53.473	47.8438	50.862	52.0271	60.5074	57.8076	55.6348	67.266	65.6393
TCONS_00001101	XLOC_000619	11.743	12.3933	4.74108	4.48607	7.14919	6.20894	10.4327	9.13962	9.49212	9.48161	7.81507	8.21934
TCONS_00001102	XLOC_000619	11.743	12.3933	4.74108	4.48607	7.14919	6.20894	10.4327	9.13962	9.49212	9.48161	7.81507	8.21934
TCONS_00001103	XLOC_000620	3.66169	4.38461	0.108421	0.1742	0.294989	0.16724	0.279429	0.356388	0.106226	0.105777	0.146021	0.149928
TCONS_00001104	XLOC_000621	10.2203	9.26462	12.124	8.62868	16.6555	18.0804	13.1319	13.1972	12.9016	13.5644	12.5516	13.3807
TCONS_00001105	XLOC_000622	3.74959	4.73902	0.806068	3.70411	7.74911	6.46954	3.92284	3.15258	4.0446	3.01251	2.5476	1.68661
TCONS_00001106	XLOC_000623	14.4748	16.1507	19.9245	21.0909	17.5635	18.0911	21.1025	19.9508	21.7047	20.0205	16.5369	16.004
TCONS_00001107	XLOC_000624	13.2651	13.6564	4.79606	3.90031	7.7038	5.30797	10.1979	8.2766	9.85831	8.63474	9.97533	11.1049
TCONS_00001108	XLOC_000625	23.9476	23.5511	15.4993	17.9119	10.9433	10.9278	13.0726	13.5703	13.774	13.2166	17.144	14.7866
TCONS_00001109	XLOC_000626	0.277148	0	0.227074	0.468995	0.214098	0.000107039	1.82652	0.0220247	0.156788	0.35578	0.524129	0.881305
TCONS_00001110	XLOC_000626	0	1.84738	0.542107	0.108147	3.064	0.836905	7.17053	1.88404	1.5094	1.37076	6.51412	12.9869
TCONS_00001111	XLOC_000626	0	0.00916649	1.5821	1.37855	1.03032	3.12664e-06	0.642964	1.93353	0	0.810321	4.55634	4.60366
TCONS_00001112	XLOC_000626	1.95137	6.25137e-05	0	0.00431226	0.363328	0	2.35411	0	0.000103456	0.0527081	6.4163e-07	0.212868
TCONS_00001113	XLOC_000626	0	0	0.158253	0	0.0850035	0.311207	0	0.292225	0	0	3.02684e-09	1.04075e-06
TCONS_00001114	XLOC_000626	0.86743	1.23434	0.158253	0	0.0850035	0.311207	1.11391	0.292225	0.397501	0.384144	2.28193	3.15724
TCONS_00001115	XLOC_000626	4.42505	4.31083	0.965508	1.15808	1.71815	0	3.52433	1.45837	0.694317	0.758447	3.89087	5.29449
TCONS_00001116	XLOC_000627	0	0	0	0	0	0	0.00814035	0	0	0	0	0
TCONS_00001117	XLOC_000628	69.551	71.1963	232.596	226.411	520.691	556.618	315.604	290.862	165.653	193.024	167.034	167.245
TCONS_00001118	XLOC_000629	0	0	0	0	0	0	0	0	0	0	0	0
TCONS_00001119	XLOC_000629	0	0	0	0	0	0	0	0	4.67334e-10	0	0	0
TCONS_00001120	XLOC_000629	0.00083885	0.185653	0.000581105	1.26473e-06	0.0422571	0.12729	2.4522e-09	0.215741	0.015473	0.00129675	0	0.136329
TCONS_00001121	XLOC_000629	15.8084	17.6903	15.5611	10.728	18.2714	13.9622	21.9467	16.6589	19.8974	20.7044	15.9755	17.5748
TCONS_00001122	XLOC_000629	0	1.24463e-07	0	0	1.18828e-09	0	0	0	0	8.23689e-10	0	2.17952e-09
TCONS_00001123	XLOC_000629	4.51944	6.49962	2.4631	3.62223	2.3733	3.36001	1.68411	1.60316	5.73091	2.1081	2.46794	3.36864
TCONS_00001124	XLOC_000629	0.766245	0.110235	0.149595	0.595309	0.497991	0.847015	0.382936	0.0307866	1.07901	0.209166	0	0.274983
TCONS_00001125	XLOC_000629	10.3125	11.2585	8.19438	9.8247	6.11227	6.6725	6.16071	10.4834	11.0773	10.9944	13.4455	12.7761
TCONS_00001126	XLOC_000630	0	0	0	0	5.16246	3.50983	0.850139	0	0	0.851251	0	0
TCONS_00001127	XLOC_000630	0	0	0	0	0	0	0	0	0	0	0	0.0626616
TCONS_00001128	XLOC_000630	0	0	0	0	0	0	0	0	0	0	0	0
TCONS_00001129	XLOC_000630	0	3.60751e-08	0	0	0	2.82467e-10	5.21755e-10	0	0	5.67411e-10	0	0
TCONS_00001130	XLOC_000630	2.68655	2.19301	1.81509	2.34817	1.40411	0.889797	2.1169	1.58235	2.99592	2.13339	1.58816	1.41473
TCONS_00001131	XLOC_000630	0	3.93072e-10	0	0	0	0	0	0	0	0	0	0
TCONS_00001132	XLOC_000630	0	3.93072e-10	0	0	0	0	0	0	0	0	0	0
TCONS_00001133	XLOC_000630	0	5.32384e-08	0	0	0	0	4.22646e-09	0	0	0	0	0
TCONS_00001134	XLOC_000630	0	5.32384e-08	0	0	0	0	4.22646e-09	0	0	0	0	0
TCONS_00001135	XLOC_000630	0	5.32384e-08	0	0	0	0	4.22646e-09	0	0	0	0	0
TCONS_00001136	XLOC_000630	0	3.93072e-10	0	0	0	0	0	0	0	0	0	0
TCONS_00001137	XLOC_000630	0	5.32384e-08	0	0	0	0	4.22646e-09	0	0	0	0	0
TCONS_00001138	XLOC_000630	2.61393	1.82544	2.069	2.69351	1.36398	1.55163	0.910295	3.17599	2.0354	1.32177	3.31672	2.86564
TCONS_00001139	XLOC_000630	0	5.32384e-08	0	0	0	0	4.22646e-09	0	0	0	0	0
TCONS_00001140	XLOC_000630	2.64888	4.34572	3.1797	1.32428	2.48073	3.43182	2.40004	1.26679	1.51854	2.31797	1.60127	3.21458
TCONS_00001141	XLOC_000630	2.26992	1.13408	0.991096	1.26364	1.3075	1.17281	1.80223	2.04445	1.26252	1.43467	1.66868	1.91849
TCONS_00001142	XLOC_000630	0.261775	0.133825	0.532051	0.822039	0	0	0.344346	0.732717	1.00514	0.70897	0.200028	0
TCONS_00001143	XLOC_000630	0	0	0.214783	0	0.315908	0	0	0.757029	0	0.390333	0.343435	0.392715
TCONS_00001144	XLOC_000631	0	0	0.21851	0.230881	0.20078	0	0	0.372498	0	0.536594	0	0.428728
TCONS_00001145	XLOC_000631	1.66126	0.103349	1.51055e-07	2.01526	0.0969245	1.57792	0.0799118	0.000197824	0.0704357	0.000140693	0.219033	2.75368e-05
TCONS_00001146	XLOC_000631	2.40404	5.10084	3.55058	1.22538	3.97136	2.78968	4.75631	3.83053	4.94516	4.32849	4.38529	5.54079
TCONS_00001147	XLOC_000631	1.40912	1.73519	1.65786	2.09678	1.0158	0.814086	2.06971	1.33933	1.55706	1.8037	0.8291	2.33301
TCONS_00001148	XLOC_000631	0.234315	2.82316e-07	0.00161698	0.85876	0.316812	0.269479	1.62126	0.109117	0.103769	0.131003	0.268129	0.00797074
TCONS_00001149	XLOC_000631	0.252966	0.00988192	0.00147441	2.49864e-10	1.87931e-06	2.1041	0	0	0.0218206	0.0120316	5.56388e-10	0.000802229
TCONS_00001150	XLOC_000631	0.410758	1.29051e-05	0.925149	0.0333541	0.999361	0.043533	0.0579178	2.13354	2.297	3.10494	2.36698	4.5473
TCONS_00001151	XLOC_000631	0.441001	0.416434	0.795237	0	6.02673e-06	0.345868	0	0	0.472578	0.279704	5.12579e-09	0.438205
TCONS_00001152	XLOC_000631	0.234315	2.82316e-07	0.00161698	0.85876	0.316812	0.269479	1.62126	0.109117	0.103769	0.131003	0.268129	0.00797074
TCONS_00001153	XLOC_000631	0.441001	0.416434	0.795237	0	6.02673e-06	0.345868	0	0	0.472578	0.279704	5.12579e-09	0.438205
TCONS_00001154	XLOC_000631	0.988691	1.99849	0.981096	2.05833	1.62354	0.339978	0.805151	3.7028	1.03215	2.24143	3.05651	0.371256
TCONS_00001155	XLOC_000632	6.28134	4.06995	4.91151	4.34066	4.88154	4.74122	5.4038	5.50069	6.39714	5.77359	7.05893	7.2489
TCONS_00001156	XLOC_000632	0	0	0.603567	1.16951	0.548553	0	1.03236	0.996506	0.867288	0.879185	0	0
TCONS_00001157	XLOC_000633	9.01603	4.89446	4.3825	4.73313	4.91609	2.42009	2.49454	4.67846	2.66324	1.702	4.63511	2.99635
TCONS_00001158	XLOC_000633	0.181436	0.00327118	9.80294	7.54898	3.91409	10.4579	6.23224	0.0104724	4.48649	0.110723	0.0334439	0.0056394
TCONS_00001159	XLOC_000633	2.8627e-05	1.70948	0.000181512	0.00765287	3.96376e-08	1.62454e-08	4.8e-07	1.16416e-05	6.52566e-05	8.07025e-05	1.77346	1.27955
TCONS_00001160	XLOC_000633	0.749565	1.99355	0	0	0.547056	0	1.46665	0	0	0	0.511828	0.935226
TCONS_00001161	XLOC_000633	6.27391e-08	1.5144e-08	4.35258e-07	2.86484e-05	0	0	3.03977e-06	3.7907e-08	2.183e-07	9.12692e-06	1.15461e-06	1.23442e-09
TCONS_00001162	XLOC_000633	14.8668	16.5415	2.66223	4.8296	9.10611	5.18908	1.1391	9.77112	5.53402	6.94269	4.74293	7.57878
TCONS_00001163	XLOC_000633	4.51978	0.0202768	0.234819	0.00611413	0.00975964	0.00361869	0.000725042	0.0104724	0.0568502	0.110723	0.0334439	0.0889918
TCONS_00001164	XLOC_000633	4.81357e-05	1.35743	2.95908e-06	0.000169066	1.26197e-08	2.55259e-10	2.15403e-05	2.3384e-07	1.33514e-06	1.87307	1.259	2.48918e-05
TCONS_00001165	XLOC_000633	2.11226	2.15174	0.757722	3.07855	0.347086	2.84949	0.899101	1.19074	2.08211	1.79197	2.83414	2.11679
TCONS_00001166	XLOC_000633	0	2.15174	0.757722	5.26536e-07	1.38834	0.712372	0.44955	1.19074	0.694036	1.19464	2.83414	0.846717
TCONS_00001167	XLOC_000634	12.2171	8.74402	0.951328	1.53783	0.565376	0.409259	0.0527202	0.661245	0.100817	0.718668	1.78018	0.674149
TCONS_00001168	XLOC_000634	7.84462	7.76511	0.668185	0.946168	0	0.206536	0.19048	0	0.320047	0	0.448646	1.24526
TCONS_00001169	XLOC_000635	1.79147	1.66536	0.606319	0.90756	0.480456	0.681684	0.231528	0.247713	0.257383	0.315357	0.103386	0.15048
TCONS_00001170	XLOC_000635	0	1.06794	0.291902	0	0.281182	0.151234	0.0976884	0.139577	0.138936	0	0.431749	0.2015
TCONS_00001171	XLOC_000635	4.78033	4.35304	1.65913	1.32318	1.15355	0.512834	0.283781	1.55586	0.929876	0.563912	2.10288	0.470027
TCONS_00001172	XLOC_000636	9.10033	11.0469	2.10965	2.22163	1.41718	0.425277	0.470662	0.227159	0.79081	0.734853	0.86222	1.38382
TCONS_00001173	XLOC_000637	6421.18	7130.98	13.5052	5.23372	16.202	3.50654	4.38894	14.0474	17.2715	1.77051	23.758	22.9682
TCONS_00001174	XLOC_000638	128.419	124.64	0	0.192541	0	0	0	0	0	0	10.5796	9.81253
TCONS_00001175	XLOC_000638	8.9362	27.3681	0	0	0	0.299238	0	0	0	0.23503	1.23838	4.10362e-06
TCONS_00001176	XLOC_000638	45.094	37.6003	0	1.82174	0.854476	0	0	0	0	0	0	0
TCONS_00001177	XLOC_000639	0	0	0	0	0	0	0	0	0	0	0	0
TCONS_00001178	XLOC_000640	1.8546	2.08576	0.228988	0	0	0.21234	0	0	0	0	0.153752	0
TCONS_00001179	XLOC_000641	1.01527	0	0	0	0.911441	0.46497	1.28648	0.413933	1.08077	0	0.336677	0.343858
TCONS_00001180	XLOC_000641	14.1524	20.5497	6.60394	5.44318	12.9738	8.76646	20.8832	9.18748	13.3659	12.1322	8.00218	10.3358
TCONS_00001181	XLOC_000642	0	2.27286	0	0	0	1.22385	5.89946	0.00739783	9.10594e-10	7.08394	0	0
TCONS_00001182	XLOC_000642	47.9667	49.1216	41.8002	41.9153	28.0978	30.6567	26.4699	39.0307	42.9782	38.9371	48.5173	43.5307
TCONS_00001183	XLOC_000643	147.185	130.161	166.045	200.848	152.348	177.568	130.235	166.464	137.489	137.519	129.289	133.648
TCONS_00001184	XLOC_000643	0	0	0	0	0	0	0	0	0	0	0	0
TCONS_00001185	XLOC_000643	0	0	0	0	0	0	0	0	0	0	0	0
TCONS_00001186	XLOC_000644	4.38392	4.40249	5.76627	4.49988	5.22669	4.85514	6.2069	2.58328	4.14528	6.83004	8.43513	3.86361
TCONS_00001187	XLOC_000644	3.43685	3.57039	1.34484	2.44676	1.44477	1.8439	0.364405	3.40387	4.16258	1.96886	2.76141	5.61998
TCONS_00001188	XLOC_000645	0	0	0.209824	0.406568	0.381397	0	0.179444	0.173212	0.150752	0.305639	0.44361	0
TCONS_00001189	XLOC_000645	0	0	0	0	0	0	0	0	0	0	0	1.20936
TCONS_00001190	XLOC_000645	0	0	0	0	0	0	0	0	0	0	0.542578	0
TCONS_00001191	XLOC_000645	0.596539	0.713614	0	0	0	0	0	0	0	0	0	0
TCONS_00001192	XLOC_000646	0.287452	0.560105	0	0	0.497317	0.128637	0.116679	0	0.294666	0.400752	0	0
TCONS_00001193	XLOC_000647	2.68838	3.50179	0	0.24831	0	0.237665	0	0	0.184142	0.0933342	0.172089	0
TCONS_00001194	XLOC_000648	154.831	161.792	1.01115	0.979631	0.597338	0.656343	0.345898	1.29381	0.108972	0.846909	2.07072	1.00544
TCONS_00001195	XLOC_000649	67.9785	74.7886	0.997097	0.784891	0.792936	0.462303	0.250838	0.604	0.610066	0.529013	0.711334	0.675471
TCONS_00001196	XLOC_000649	60.3514	74.2527	0.113362	0.225057	0.235623	0.870056	0.193926	0.479639	0.180785	0	1.43069	1.69687
TCONS_00001197	XLOC_000650	0	0	0	0	0	0	0	0	0	0	0	0
TCONS_00001198	XLOC_000650	1.89302	1.64473	0.155821	0	0.49233	0.288985	0.533042	0.128633	0.111953	0.113488	0.575435	0.495308
TCONS_00001199	XLOC_000651	0.258863	0.312326	0.0891517	0.0992965	0	0.0474211	0.0218674	0	0.0490133	0.0560035	0.0343368	0.0528463
TCONS_00001200	XLOC_000652	0	3.51322e-06	0.527767	0.0212071	0.269752	1.4868	0.00596754	0.717391	0.742664	0.649829	0.966803	0.0912066
TCONS_00001201	XLOC_000652	6.35949	6.9677	1.4525	1.98899	1.05458	0	0.872343	0.410743	0.836307	1.10359	2.59312	3.00486
TCONS_00001202	XLOC_000653	2.20712	3.75091	0.327016	0.52804	0.0990697	0.303241	0.279669	0.269957	0.156634	0.158783	0.146381	0.0747517
TCONS_00001203	XLOC_000653	0	0	0	0	0	0	0	0	0	0	0	0
TCONS_00001204	XLOC_000654	81.92	93.4204	2.09722	2.76042	1.87158	2.45532	1.17875	1.89324	1.84053	1.07483	3.17241	3.81035
TCONS_00001205	XLOC_000654	48.0531	44.7712	1.70874	1.00294	0.517663	0.52817	1.1366	1.41059	1.09127	1.3828	1.91219	1.30199
TCONS_00001206	XLOC_000655	0	1.09975	0.730979	1.21364	0.2491	1.41201	0.51819	0.51759	0	0.420733	0.555539	0
TCONS_00001207	XLOC_000655	2.43066	3.16966	10.6742	11.9393	7.24724	5.72183	4.70048	6.38482	4.76092	4.01691	4.44326	3.65958
TCONS_00001208	XLOC_000656	33.9804	34.3695	47.8163	45.9828	34.0011	33.1128	31.32	32.9435	31.9031	32.2431	30.4027	27.2435
TCONS_00001209	XLOC_000657	0.687426	0	0	0	0	0	0.580701	1.12107	0.975699	0.494542	0.455916	0.465641
TCONS_00001210	XLOC_000657	1090.43	1383.8	1153.61	1082.04	1025.51	1130.75	1102.84	891.114	884.284	867.192	865.031	818.021
TCONS_00001211	XLOC_000658	0.401585	0	0	0	0	0	0	0	0	0	0	0
TCONS_00001212	XLOC_000658	0	1.39623	0.24597	0.272443	0.836946	0.766449	0.243372	0.215872	0.344369	0.354833	0.313198	0.368711
TCONS_00001213	XLOC_000658	2.27738	1.57581	0	1.41017	0.327297	1.21656	0	0	0	0	0	0.32016
TCONS_00001214	XLOC_000658	41.6645	42.6088	10.8764	12.6801	8.02482	6.986	9.01256	9.04043	9.52723	8.75749	14.3868	15.2159
TCONS_00001215	XLOC_000659	125.539	126.792	47.5166	68.5119	98.0735	95.9476	79.7904	78.7372	75.2428	109.281	67.6785	72.5802
TCONS_00001216	XLOC_000659	1717.8	1868.62	1593.9	1530	1426.97	1523.95	1348.89	1281.53	1152.3	1132.28	989.239	1078.05
TCONS_00001217	XLOC_000660	0.876855	1.28561	0	0	0.78112	0	0	0.366895	0.298358	0	0	0
TCONS_00001218	XLOC_000660	17.1185	18.1247	6.62506	6.52545	4.96655	6.6353	8.73973	6.90207	9.09033	7.73331	10.0091	10.1007
TCONS_00001219	XLOC_000661	0.00266024	0.819072	1.43536	1.52438	0.214588	3.50442	6.6605e-09	1.29506	4.13525	1.85892	2.79365	7.77286e-06
TCONS_00001220	XLOC_000661	0.0491923	0.0239929	0.0323197	0.0454178	0.00585668	0.0762744	0	0.0353458	0.114794	0.0405744	0.0888303	0.819225
TCONS_00001221	XLOC_000661	0.0491923	0.0239929	0.0323197	0.0454178	0.00585668	0.0762744	0	0.0353458	0.114794	0.0405744	0.0888303	0.819225
TCONS_00001222	XLOC_000661	0.0491923	0.0239929	0.0323197	0.0454178	0.00585668	0.0762744	0	0.0353458	0.114794	0.0405744	0.0888303	0.819225
TCONS_00001223	XLOC_000661	0.0259226	0.0133341	0.0171924	0.0253124	0.00321679	0.0403456	0	0.0194137	0.0632292	0.021472	0.0500461	0.425449
TCONS_00001224	XLOC_000661	7.08768	5.01608	0	1.59289	2.84112	0	3.51028	2.73886	0	1.36111	1.84367	3.53313e-05
TCONS_00001225	XLOC_000661	2.01476	1.58285	0	0.505441	0.876055	0	0.989578	0.844524	0	0.390146	0.597586	9.7597e-06
TCONS_00001226	XLOC_000661	0.186181	0.313571	0	0	0.165496	0.156492	0	0	0	0.0959401	0	8.43873e-06
TCONS_00001227	XLOC_000661	0.0466023	0.0500543	1.86585	0.0162511	0.0258514	0	0.0223262	0.0249209	0	0.00925183	0.0204765	1.30232
TCONS_00001228	XLOC_000661	0.00878342	0.0190625	0	0	0.00951197	0.0075165	0	0	0	0.00461848	0	0.121744
TCONS_00001229	XLOC_000661	0	0.595992	0	0	0	0	0	0	0	0.441303	0	0.224745
TCONS_00001230	XLOC_000661	0	0.595992	0	0	0	0	0	0	0	0.441303	0	0.224745
TCONS_00001231	XLOC_000661	0	0.0571624	0	0	0	0	0	0	0	0.0396962	0	0.010733
TCONS_00001232	XLOC_000661	0	0.193425	0	0	0	0	0	0	0	0.130401	0	0.0640576
TCONS_00001233	XLOC_000661	0	0.193425	0	0	0	0	0	0	0	0.130401	0	0.0640576
TCONS_00001234	XLOC_000661	0	0.193425	0	0	0	0	0	0	0	0.130401	0	0.0640576
TCONS_00001235	XLOC_000661	0	0	0	0	0	0	0	0	0	0	0.156849	0.261833
TCONS_00001236	XLOC_000661	0	0	0	0	0	0	0	0	0	0	0.156849	0.261833
TCONS_00001237	XLOC_000661	0	0	0	0	0	0	0	0	0	0	0.156849	0.261833
TCONS_00001238	XLOC_000662	0	0	0	0	0	0	0	0	0	0	0	1.20048
TCONS_00001239	XLOC_000663	3.24809	1.85546	0.534722	0.222024	0.0694262	0.14167	0.130658	0.18918	0.0548831	0.27818	0.205162	0.261923
TCONS_00001240	XLOC_000664	0	2.23634	3.83903	1.14285	0.498953	0.512255	0.472435	1.36808	1.58758	1.20249	0.370915	0.757653
TCONS_00001241	XLOC_000664	7.76387	4.1391	0	1.32179	80.4845	60.1878	58.9445	71.2848	118.71	106.916	64.7293	78.9413
TCONS_00001242	XLOC_000665	27.424	25.7737	22.06	22.944	31.902	32.5193	29.7972	28.6553	36.8966	33.386	36.7686	38.198
TCONS_00001243	XLOC_000666	5.89222	4.71242	2.32804	3.38323	1.58689	1.07944	0.497746	0.480458	2.09078	1.6956	3.12634	1.99565
TCONS_00001244	XLOC_000666	39.5893	40.6206	13.5278	18.3717	5.61832	6.11859	6.28036	1.70108	3.60519	7.91804	13.6508	12.4666
TCONS_00001245	XLOC_000666	10.4755	1.94939	4.57084	3.47302e-09	1.12168	0.0530727	0.543658	10.8373	4.4477	0.56034	0.0185543	0.57756
TCONS_00001246	XLOC_000667	64.3895	69.8309	47.8136	48.6768	36.048	33.179	40.1578	41.3905	40.1476	37.9174	48.2892	47.9242
TCONS_00001247	XLOC_000668	1.28415	1.80665	1.13595	1.691	1.30335	1.74439	0.0367637	1.61036	3.77635	3.24504	3.87976	3.7589
TCONS_00001248	XLOC_000668	0.973466	1.12015	0.987551	0.552435	0.704422	1.02633	0.720356	0.406326	0.862187	1.05082	0.710414	0.478024
TCONS_00001249	XLOC_000668	0.173361	0.0866531	0.0856198	0.0829513	0	0.079395	0.146446	0.282722	0.12303	0.0635569	0.0531847	0.176144
TCONS_00001250	XLOC_000668	0	0	0	0	0	0	0	0	0	0	0	0
TCONS_00001251	XLOC_000669	36.8327	37.8769	28.9344	31.0917	21.376	24.8223	15.9951	20.5129	10.0166	12.383	9.77794	8.16009
TCONS_00001252	XLOC_000669	0	0	0	0	0	0	0	0	0	0	0	0
TCONS_00001253	XLOC_000669	0	0	0	0	0	0	0	0	0	0	0	9.97837e-10
TCONS_00001254	XLOC_000669	7.00443	5.87133	6.27329	5.92301	4.21185	9.02911	3.28413	1.39827	3.0264	3.6148	3.5528	0.665894
TCONS_00001255	XLOC_000669	0	0	0.406815	0.619649	0.816314	0	0	0	0	0	0.306183	0
TCONS_00001256	XLOC_000669	0	0	0	0	0	0	0	0	0	0	0	0
TCONS_00001257	XLOC_000669	0.392661	3.66317	2.38906	1.50074	0	4.02445e-09	1.13758	0.716182	0	0.294806	0.683367	0
TCONS_00001258	XLOC_000669	2.25374	2.69831	5.06117	3.32318	2.48892	2.26648	1.34237	2.84753	1.56511	0.976934	0.927125	1.38341
TCONS_00001259	XLOC_000669	0	0	0	0	0	0	0	0	0	0	0	0
TCONS_00001260	XLOC_000669	2.74417	2.22451	3.19305	1.9887	2.98642	3.86787	2.34709	0.869441	2.39626	2.92519	1.19117	1.05135
TCONS_00001261	XLOC_000670	0.480992	0.24667	0	0.0731401	0	0	0	0	0	0	0	0.374433
TCONS_00001262	XLOC_000670	0	0.290776	0.244441	0.175375	0.296741	0.492604	0	0	0.2935	0.217474	0.284641	0.372377
TCONS_00001263	XLOC_000670	0.427167	0.067802	0.0511374	0.0411805	0.0672042	0.101621	0.337138	0.447772	0.066937	0.0449157	0.0686555	0.073402
TCONS_00001264	XLOC_000671	1.97032	2.45512	3.0451	3.08671	2.36058	2.59047	4.40315	4.83329	5.02805	5.13533	1.49875	2.29901
TCONS_00001265	XLOC_000671	0	0	0	0	0	0	0	0	0	0	0	0
TCONS_00001266	XLOC_000672	0	0	3.3901e-06	0.00316106	1.19343	0.983064	0.00751682	0.0165345	2.25095	2.46176	2.18721	8.73081
TCONS_00001267	XLOC_000672	0	0	3.3901e-06	0.00316106	1.19343	0.983064	0.00751682	0.0165345	2.25095	2.46176	2.18721	8.73081
TCONS_00001268	XLOC_000672	27.1588	26.1204	15.8184	14.5132	10.6108	12.1794	18.4199	20.2076	24.1158	22.8522	32.826	19.5152
TCONS_00001269	XLOC_000673	31.9749	37.3773	20.7866	20.6276	17.3329	19.2754	25.7162	26.9057	39.5113	39.0979	52.5757	45.1859
TCONS_00001270	XLOC_000674	1.35663	2.26589	2.88836	2.95934	2.76433	2.49548	2.64778	3.01846	2.0928	1.83581	1.09879	1.19403
TCONS_00001271	XLOC_000675	0.625267	1.16825	0.628927	0.74452	0	0.195234	0	0.375449	0.875705	0.186984	0.149141	0.265891
TCONS_00001272	XLOC_000676	0	0	0	0	0	0	0	0	0	0	0	0
TCONS_00001273	XLOC_000677	0.373544	1.12028	0	0.357473	0	0	0.315551	0.304592	0.530191	0.268732	0	0
TCONS_00001274	XLOC_000678	0.173665	0	0.17154	0	0.311809	0	0	0	0	0.124937	0	0
TCONS_00001275	XLOC_000679	0	0.268907	0	0	0.484498	0	0	0.21934	0	0	0	0
TCONS_00001276	XLOC_000680	0	0	0	0	0	0	0.880219	0	0	0	0	0
TCONS_00001277	XLOC_000681	0.979072	0.875734	0.101799	0	0.04626	0.141597	0.0870598	0.0840364	0.0731393	0.0370713	0.0683518	0.0349049
TCONS_00001278	XLOC_000682	22.9082	23.03	8.9874	11.6097	40.4935	26.8343	29.6544	15.9435	15.7537	17.4089	14.9793	15.1239
TCONS_00001279	XLOC_000683	0	0	0	0	0	0	0	0	0	0	0	0
TCONS_00001280	XLOC_000684	17.1646	29.5132	8.71923	16.6941	21.5253	12.7198	14.8752	12.5164	11.2521	8.53297	11.3564	8.00985
TCONS_00001281	XLOC_000685	2.80962	3.17842	1.31881	1.23332	0.388166	0.744263	0.620938	0.829926	0.654315	0.584322	1.41286	0.941806
TCONS_00001282	XLOC_000686	19.8334	19.2048	7.64301	9.4475	3.35342	5.621	4.20734	6.16437	6.24868	4.99074	7.19635	7.10887
TCONS_00001283	XLOC_000687	6.73692	6.30028	4.29321	6.2391	2.92642	2.5877	3.30445	2.65808	5.24371	4.92479	4.90047	4.56338
TCONS_00001284	XLOC_000688	0	0	0	0	0	0	0	0	0	0	0	0
TCONS_00001285	XLOC_000689	18.646	49.707	36.8357	5.94794	11.1594	34.1576	21.0016	35.4765	52.9306	102.842	45.3437	50.521
TCONS_00001286	XLOC_000690	0	0	0	0	0	0	0	0	0	0	0	0
TCONS_00001287	XLOC_000691	3.51911	4.53935	0.784914	0.76045	0.30573	0.415913	0	0.185131	0.0805623	0.653339	0.301156	0.230685
TCONS_00001288	XLOC_000692	0.359634	0.08988	0.177616	0.258121	0.24214	0.329406	0.4557	0.146625	0.191418	0.194044	0.298147	0.121803
TCONS_00001289	XLOC_000693	0	0.439813	0	0	0	0.14867	0.415262	0.358742	0	0	0.317613	0
TCONS_00001290	XLOC_000694	0	0	1.0922	3.13427	0.846338	0	0.79639	0	0	0	0	0
TCONS_00001291	XLOC_000695	0	0	5.67199	2.55996	0	1.2251	3.38961	0	1.64665	1.24037	0	1.17937
TCONS_00001292	XLOC_000696	2.6181	2.11875	19.3339	25.1739	52.0434	40.6526	40.0201	25.5163	24.5965	28.2524	13.0642	18.9165
TCONS_00001293	XLOC_000697	0.174893	0	0	0	0	0	0	0	0	0	0	0
TCONS_00001294	XLOC_000698	0	0	0	0	0	0	0	0.0816148	0	0	0.0663821	0
TCONS_00001295	XLOC_000699	0	5.54759	7.28696	3.8274	0	1.71282	2.82352	1.61324	3.39438	2.84465	3.68189	0
TCONS_00001296	XLOC_000700	1.20719	0.965443	0.476965	1.3863	0.650236	1.10572	0.61186	0	0.856711	0.868463	1.28101	1.47188
TCONS_00001297	XLOC_000701	2.12565	1.43915	1.75631	1.28421	1.71789	1.84359	1.18578	1.72133	1.35277	1.00298	1.66061	1.66511
TCONS_00001298	XLOC_000702	0	0.773109	0.572917	0	1.04139	0.531264	0.489966	0.788252	0.823246	0.556359	0.641132	0.392885
TCONS_00001299	XLOC_000703	0.121758	0	0	0	0	0	0	0	0	0	0	0
TCONS_00001300	XLOC_000704	0.105196	0	0.103908	0	0	0	0	0	0	0	0	0
TCONS_00001301	XLOC_000705	2.05616	1.82059	4.81635	6.18418	6.3287	5.11191	3.92051	5.07775	10.2144	8.83307	15.2733	14.2461
TCONS_00001302	XLOC_000706	2.19995	1.82659	5.85063	9.03068	6.48134	5.29455	4.7128	4.19638	3.83692	2.5368	3.18911	2.53671
TCONS_00001303	XLOC_000707	1.76891	0.387867	1.43672	3.30508	4.1211	1.00578	3.82816	3.94551	1.7527	0.897295	0.689168	1.7149
TCONS_00001304	XLOC_000708	0	0	0	0	0	0	0	0	0	0	0	0
TCONS_00001305	XLOC_000709	0	0	0	0	0	0	0	0	0.423195	0	0	0
TCONS_00001306	XLOC_000710	0	0	0	0	0	0	0	0	0	0	0	0
TCONS_00001307	XLOC_000711	0	0	0	0	0	0	0	0	0	0	0	0
TCONS_00001308	XLOC_000712	0	0	0	0.440606	0.421427	0.626136	0	1.28461	1.43688	4.53211	4.04747	0
TCONS_00001309	XLOC_000713	5.00227	6.55645	6.31356	7.07419	5.88778	5.65091	6.10372	5.93707	7.06053	6.31769	6.93013	6.62617
TCONS_00001310	XLOC_000714	0.383199	0.422353	0.346556	1.14664	5.52955	2.39922	18.4166	16.3091	103.172	60.4508	24.8526	37.2634
TCONS_00001311	XLOC_000715	3.46649	3.17083	13.674	11.3796	7.76286	8.75549	8.03653	9.04458	9.72146	9.97777	6.45464	7.07472
TCONS_00001312	XLOC_000715	0	0	0	0	0	0	0	0	0	0	0	0
TCONS_00001313	XLOC_000715	3.10832	2.99923	5.14625	5.70839	16.0358	13.8893	15.0682	11.2372	10.5024	11.2075	4.79419	6.45222
TCONS_00001314	XLOC_000716	2.64661	0.611415	2.41628	0	2.8778	2.3043	4.69255	4.71868	2.17278	2.64601	2.21497	1.63126
TCONS_00001315	XLOC_000716	1.64667	3.36913	0.545553	0.485481	0.950961	0.289383	0.967142	0.624988	0.75646	0.824283	0.694714	1.33715
TCONS_00001316	XLOC_000716	4.07592	4.85616	1.80175	1.9934	1.35964	2.89168	1.47616	1.83613	1.49839	3.01083	3.87882	1.87037
TCONS_00001317	XLOC_000717	3.97814	3.97688	5.47363	10.0283	0	6.5076	3.36052	0.40412	0	0.178271	6.54965	0
TCONS_00001318	XLOC_000717	4.68995	4.68846	3.08837	4.48816	2.44584	1.43192	3.96182	10.198	3.86699	4.49866	2.07365	4.92127
TCONS_00001319	XLOC_000718	103.348	82.9434	53.7142	67.0861	42.1431	40.6529	29.5802	69.9819	45.4003	45.6197	63.7455	95.0527
TCONS_00001320	XLOC_000718	2.73685	11.4373	0.221002	0	0.12625	0.0648754	0.058475	0.159156	0.171091	0.193773	0.579896	0.227722
TCONS_00001321	XLOC_000718	0.182303	2.0486	4.09591	3.53164	2.99023	2.19469	3.02959	1.40747	1.03038	1.03873	13.18	1.30234
TCONS_00001322	XLOC_000718	0.316983	0.00382809	11.8781	9.46753	8.21589	6.4255	8.99044	3.86714	2.8176	3.03874	1.65959	3.93283
TCONS_00001323	XLOC_000718	0	0	0	0	0	0	0	0	0	0	0	0
TCONS_00001324	XLOC_000718	0	0	0	0	0	0	0	0	0	0	0	0
TCONS_00001325	XLOC_000718	9.34292e-06	7.67488e-05	2.52765e-05	0	0.0938134	0.0133453	0.210438	0.00571169	7.13965e-05	2.9062e-07	0.0556353	0.000322068
TCONS_00001326	XLOC_000718	0.316983	0.00382809	11.8781	9.46753	8.21589	6.4255	8.99044	3.86714	2.8176	3.03874	1.65959	3.93283
TCONS_00001327	XLOC_000718	4.59347	0.0326504	0.597636	0	0.324612	0.177005	0.161567	0.409217	0.437951	0.528295	0.0826654	0.63955
TCONS_00001328	XLOC_000718	0	0	0	0	0	0	0	0	0	0	0	0
TCONS_00001329	XLOC_000718	22.5683	21.0706	1.29728	4.93663	2.27178	10.6579	0.0195226	12.8223	9.89134	10.6816	10.0223	17.5673
TCONS_00001330	XLOC_000718	0	0	0	0	0	0	0	0	0	0	0	0
TCONS_00001331	XLOC_000718	0.216653	17.4841	4.55721	5.82777e-05	13.981	18.1062	16.8887	0.051834	2.19522	3.16042	21.2697	4.27494
TCONS_00001332	XLOC_000719	5.85714e-05	1.93392	0.00431891	6.31581e-08	0.00039145	7.04484e-06	0.000142364	7.02586e-09	2.55898e-07	1.01635e-05	0.000216973	0
TCONS_00001333	XLOC_000719	4.26248	1.93392	36.4964	36.273	22.0173	25.4979	17.2835	22.6457	10.5643	9.78926	8.11113	4.93064
TCONS_00001334	XLOC_000720	6.05125	5.4501	11.3341	9.88823	6.86735	7.26817	7.71589	6.33075	8.12295	8.15223	10.8852	7.30847
TCONS_00001335	XLOC_000721	56.5846	45.2263	49.2224	50.1438	46.9181	42.4277	44.4914	49.2231	47.4405	51.3945	52.6648	48.9399
TCONS_00001336	XLOC_000722	22.3098	22.5384	24.5522	23.9603	28.4417	24.9451	23.1787	25.0243	20.3247	18.9695	25.7767	28.8538
TCONS_00001337	XLOC_000722	0	2.46207	2.94654	2.81619	4.15876	8.40112	4.53645	1.30825	4.34232	5.06093	0.588945	0.905483
TCONS_00001338	XLOC_000722	2.4634	3.09971	5.36073	4.4719	3.10533	4.84095	3.23339	4.69195	3.34981	2.46693	3.37778	2.30729
TCONS_00001339	XLOC_000722	1.06831	1.29126	4.08853	4.98465	1.6437	1.427	1.6669	1.76575	0.446024	0.697968	1.33494	1.69943
TCONS_00001340	XLOC_000722	4.42239	5.41391	11.2263	9.49324	9.75804	9.86197	8.65672	8.37965	6.89934	5.32228	7.77512	6.98746
TCONS_00001341	XLOC_000723	0.387663	0.305368	0.571672	0.566137	0.505354	0.279434	0.45353	0.295846	0.399488	0.175826	0.157374	0.211772
TCONS_00001342	XLOC_000723	0.0834648	0	0	0	0	0	0	0	0	0	0	0
TCONS_00001343	XLOC_000724	0	0	0	0	0.109511	0	0	0	0	0.0951211	0	0.0436029
TCONS_00001344	XLOC_000725	0.518088	0.725093	0	0	0.0310068	0	0.0291769	0	0	0	0	0
TCONS_00001345	XLOC_000726	22.3117	23.335	16.7835	16.2286	15.7313	14.9846	14.9153	17.7323	22.6538	19.8069	21.215	21.5324
TCONS_00001346	XLOC_000726	0	0	0	0	0	0	0	0	0	0	0	0
TCONS_00001347	XLOC_000727	7.76462	5.82218	22.729	14.861	12.1996	8.89006	11.4785	11.0804	11.0218	12.5687	6.43816	6.5743
TCONS_00001348	XLOC_000727	9.92412	15.3938	5.99801	16.314	21.838	19.7604	25.5047	36.8501	21.4086	21.9159	12.7363	14.0278
TCONS_00001349	XLOC_000728	0.309502	5.04086e-09	0.859327	0.389613	0	7.30995e-10	0.261232	0.000228004	0.000912462	0.000103581	0	1.39091e-05
TCONS_00001350	XLOC_000728	0.121028	1.44013	0.3407	1.22769e-07	0	1.02869	0.10152	1.34077	1.1932	1.16248	0.839096	0.946126
TCONS_00001351	XLOC_000728	1.05838	0	0.0271535	0.963005	2.38174	2.49023e-10	1.18154	0	0.000237658	4.88639e-10	0	0
TCONS_00001352	XLOC_000728	0.405829	0.00355174	0.0105595	2.24091e-07	5.48328e-06	0.553723	0.450191	4.54616e-09	0.364894	7.35195e-06	1.05405e-09	9.35119e-09
TCONS_00001353	XLOC_000728	0.121028	1.44013	0.3407	1.22769e-07	0	1.02869	0.10152	1.34077	1.1932	1.16248	0.839096	0.946126
TCONS_00001354	XLOC_000728	0.578991	0	1.59283	0.690016	0	1.36246e-09	0.49072	0.000409604	0.0016347	0.000192971	0	2.63939e-05
TCONS_00001355	XLOC_000728	0.0315969	0.000341817	0.000853568	2.18105e-08	5.03534e-07	0.0437634	0.0344641	4.17477e-10	0.0338877	5.82151e-07	0	6.86934e-10
TCONS_00001356	XLOC_000728	0	0	0.913245	0.611464	0.85802	0	0.404501	0.385512	0.521739	0	0	0
TCONS_00001364	XLOC_000728	0	0	0	0	0	0	0	0	0	0	0.113514	0
TCONS_00001357	XLOC_000729	5.82223	4.30767	1.78519	1.35667	1.04802	1.57534	3.94337	1.71487	2.34287	2.78367	6.88691	6.66465
TCONS_00001358	XLOC_000729	15.2945	20.507	3.10375	4.52057	6.50184	6.02731	13.9866	15.4363	7.46038	9.22928	50.1428	41.9368
TCONS_00001359	XLOC_000729	0	0	0	0.337617	0	0	1.31046	0	0	0.382387	0.851054	0
TCONS_00001360	XLOC_000729	29.8399	29.0964	9.94723	9.50423	13.9847	12.5165	33.3998	24.6721	17.185	16.8525	67.7619	56.8093
TCONS_00001361	XLOC_000729	54.4383	38.7606	16.0644	17.0468	26.0098	28.2623	56.0367	41.911	30.8662	28.0779	141.473	122.994
TCONS_00001362	XLOC_000729	0	0	0.727975	0	0	0	0	0	0	0	0	0
TCONS_00001363	XLOC_000729	31.0917	32.0211	9.59816	7.93104	16.2006	16.1241	41.1739	33.1414	16.8362	20.7436	129.15	93.0057
TCONS_00001365	XLOC_000730	3.86677	5.41176	37.3762	33.6737	25.3096	33.6013	19.8143	23.6476	12.3487	14.1872	18.9549	14.3369
TCONS_00001366	XLOC_000730	0	0	2.864	4.64306e-09	2.48211	4.94811	2.52986	1.25304e-08	1.50932e-07	0	1.83172	2.17162
TCONS_00001367	XLOC_000730	7.05802	5.90913	45.6937	49.6457	60.8945	48.8859	27.691	32.8978	26.2275	28.9438	31.1252	21.7104
TCONS_00001368	XLOC_000731	4.50895	9.49566	9.37837	9.19843	0.0158305	3.92343	7.20715	5.74485	7.53961	7.95907	9.28214	4.90379
TCONS_00001369	XLOC_000731	1.29886	1.7782	1.82857	1.20441	1.28724	1.76142	1.59721	1.31235	1.65587	1.04198	1.12883	0.983485
TCONS_00001370	XLOC_000731	12.671	12.9364	9.09206	11.2942	11.9564	9.61272	11.9457	12.5523	12.0343	10.7062	12.8684	14.0165
TCONS_00001371	XLOC_000732	4.02858	5.3328	3.0186	4.3199	4.58258	2.42055	3.01033	0.340504	3.59902	3.77059	1.77604	4.03502
TCONS_00001372	XLOC_000732	1.00981	1.84217	1.80351	3.12158	1.70178	1.71573	1.98392	1.79516	2.09229	2.26218	2.37429	2.05161
TCONS_00001373	XLOC_000733	1.64725	1.44287	0.89848	0.735608	0.965095	0.828112	1.00852	1.04069	0.632805	0.93112	0.80951	1.32571
TCONS_00001374	XLOC_000733	4.2831	3.87576	25.3048	30.7542	16.3057	25.2031	11.188	14.8845	6.91887	8.39003	4.95403	4.34293
TCONS_00001375	XLOC_000733	0	0.350125	0.444322	0.343346	0.491779	0.606805	0.468274	0.377544	0.25393	0.304898	0.30097	0.266929
TCONS_00001376	XLOC_000733	0.30235	0	0	0	0	0	0	0	0	0	0	0
TCONS_00001377	XLOC_000733	1.51285	2.61011	19.0885	18.1177	10.6335	22.071	3.73948	8.02489	2.48512	3.45473	1.97091	1.04848
TCONS_00001378	XLOC_000734	6.82364	7.63711	1.10176	0.625607	0.778646	1.0076	1.41	0.904886	0.756435	0.6315	1.95102	1.61282
TCONS_00001379	XLOC_000735	4.56255	3.86471	4.50011	4.13439	11.8036	2.79975	7.78714	3.92755	4.72469	5.12436	7.54157	6.64792
TCONS_00001380	XLOC_000735	12.8424	14.4986	16.2741	16.6857	22.1973	32.6267	14.6778	14.9959	17.2058	16.3537	15.9188	16.032
TCONS_00001381	XLOC_000735	0.00620482	0.54525	0.0629606	0.00498866	0.0839351	0.0358187	0.255336	0.0520975	0.013655	0.0404424	0.248797	0.133011
TCONS_00001382	XLOC_000735	7.24045	7.31479	5.96443	6.8771	8.30113	7.8962	5.41548	6.10459	6.75434	7.48119	10.8184	8.70973
TCONS_00001383	XLOC_000736	45.3817	39.6224	31.3834	36.3925	24.8364	27.1044	32.8336	34.8564	58.1443	47.9745	78.8959	71.6067
TCONS_00001384	XLOC_000736	0	0	0	1.68501	0.754038	0	0	1.55484	0.507966	0	0.544748	0
TCONS_00001385	XLOC_000736	2.42018	2.25026	1.69122	0.126555	0.0530894	1.07849	1.38778	0.109471	1.97475	2.37503	2.10899	2.78057
TCONS_00001386	XLOC_000737	3.7115	3.52971	3.30113	4.23069	3.59835	2.44759	2.72524	3.77078	3.72935	3.10121	3.45463	3.39821
TCONS_00001387	XLOC_000737	0	0	0.634053	0.457635	0	0.457084	0	0	0	1.22631	0.759746	0
TCONS_00001388	XLOC_000737	2.16187	0.561922	1.5707	0	0.70885	1.58073	1.04398	0	2.69363	1.35509	1.5775	2.39484
TCONS_00001389	XLOC_000737	0	0	3.98732	4.14757	0	1.5278	0	1.76701	3.07576	0.332669	5.19914	0
TCONS_00001390	XLOC_000738	2.58706	2.11079	0.974234	1.59785	0.900996	0.693926	0.675866	1.25253	0.747598	0.992708	0.858064	0.806058
TCONS_00001391	XLOC_000738	0	0	0	0	0	0	0.180218	0.173959	0	0	0	0
TCONS_00001392	XLOC_000738	0.509473	0.896861	0.268285	0.221789	0.605557	0	0.525655	0	0.132111	0.130475	0.644219	0.795192
TCONS_00001393	XLOC_000738	0	0	0.605435	0	0.210766	0.561419	0	0	0	0	0.262025	0
TCONS_00001394	XLOC_000739	3.55119	2.55539	2.89233	3.186	2.29138	2.78875	2.62595	2.62421	4.05069	3.62705	3.29364	3.46156
TCONS_00001395	XLOC_000739	0	0.409034	0	0	0	0	0	0	0	0.430507	0	0
TCONS_00001396	XLOC_000739	0	0	0.271089	0	0	0.126567	0.272905	0	0.466795	0	0.193719	0.303451
TCONS_00001397	XLOC_000739	0.225745	0	0	0.216033	0.101329	0	0	0.0920376	0	0	0	0
TCONS_00001398	XLOC_000740	0	0	0	0	0	0	0	0	0	0.175404	0	0
TCONS_00001399	XLOC_000741	0	0	0.0334055	0	0	0.0619536	0.0571376	0.0551534	0.0240008	0.02433	0.246727	0.206174
TCONS_00001400	XLOC_000742	0	0	0.146197	0.0432488	0	0	0.0831247	0	0.103553	0	0	0
TCONS_00001401	XLOC_000742	0.202868	0.284526	0	0	0	0	0.079791	0.0759966	0	0	0.191625	0
TCONS_00001402	XLOC_000742	0	0	0	0	0	0	0	0	0	0.128695	0.0566101	0.35097
TCONS_00001403	XLOC_000742	0	0	0	0	0	0	0	0	0	0	0	0
TCONS_00001404	XLOC_000742	0	0	0	0	0	0.125755	0	0	0	0	0.185433	0
TCONS_00001405	XLOC_000743	12.8612	12.3591	1.07497	1.06332	0.648572	0.788798	0.58675	0.987612	0.939209	0.719564	1.41583	1.2609
TCONS_00001406	XLOC_000744	1.94097	0.881978	0.522876	0.506579	0.747031	0.402342	0.298114	0.575522	0.184207	0.253882	0.117027	0.144511
TCONS_00001407	XLOC_000745	1.26909	0.990793	1.07499	0.596194	0	0	0.502406	0.929897	0.886667	0.633092	0.841691	1.02849
TCONS_00001408	XLOC_000745	1.15313	0	1.38133e-07	0	1.05792	0.548791	0	1.22156e-05	0	0	0.339111	0
TCONS_00001409	XLOC_000746	0.449291	0.252056	1.01531	0.942945	7.0548	2.2296	20.4879	16.957	121.418	71.1516	27.0929	49.8448
TCONS_00001410	XLOC_000747	0	1.83977	5.6051	5.4304	3.96216	2.88755	1.59785	2.05648	0.894908	1.36078	0.418165	2.98959
TCONS_00001411	XLOC_000747	1.58031	0.00262718	7.91289	8.5617	9.66099	14.7313	7.66733	7.93578	8.19944	7.03437	6.06173	3.27897
TCONS_00001412	XLOC_000748	0	0	0	0	0	0	0	0	0	0	0	0
TCONS_00001413	XLOC_000749	12.3264	14.1436	44.2614	43.3728	59.7375	61.6913	53.5529	42.2786	31.1253	29.1443	26.7655	24.5884
TCONS_00001414	XLOC_000749	0	6.11221e-10	3.51969e-08	9.55235e-09	1.678e-07	8.64559e-10	1.22938e-08	1.61296e-07	1.08461e-08	4.30819e-09	0	0
TCONS_00001415	XLOC_000749	12.9056	13.301	40.5669	47.2901	37.7004	53.5377	41.4773	45.1402	21.6056	34.2478	38.7724	30.8225
TCONS_00001416	XLOC_000749	6.40004	7.15373	20.3415	17.7859	35.6073	37.1251	21.8672	18.3426	17.3913	11.6315	7.44633	9.49969
TCONS_00001417	XLOC_000749	1.17153e-07	3.27522e-08	0	3.04963e-08	1.69678e-07	5.30937e-09	1.57124e-09	2.45296e-07	6.07844e-09	1.59234e-10	8.14847e-08	1.69802e-09
TCONS_00001418	XLOC_000749	0	0	6.59286e-09	1.87626e-08	3.33905e-07	4.17999e-10	3.71658e-09	1.20236e-07	5.82116e-09	4.91667e-09	5.3576e-10	0
TCONS_00001419	XLOC_000749	0.0602096	0.00564927	3.53748e-05	0.00496388	0.0372631	0.00252573	0.000880886	0.0538697	0.00125971	7.50208e-05	0.0106204	0.00117743
TCONS_00001420	XLOC_000749	0	0	0	0	0	0	0	0	0	0	0	0
TCONS_00001421	XLOC_000749	1.24529e-05	4.14745e-05	4.80169e-05	0.00010927	0.000162138	7.80412e-05	3.90046e-05	8.35232e-05	8.39181e-05	2.46882e-05	5.71319e-05	1.36999e-05
TCONS_00001422	XLOC_000749	0.0231014	0.0121798	7.909e-05	0.00157209	0.0221822	0.00423866	0.00128238	0.0249678	0.00161267	3.12478e-05	0.000150933	0.000178599
TCONS_00001423	XLOC_000749	0	0	0	0	0	0	0	0	0	0	0	0
TCONS_00001424	XLOC_000749	0.176866	3.44449e-10	3.82396	4.02169	6.59193	9.29053	4.14756	6.48496	3.84511	0.00599879	0.0142407	0.0327501
TCONS_00001425	XLOC_000749	2.56209	2.87726	6.71833	6.91735	4.74457	5.32032	3.12162	4.94068	3.49638	7.34461	7.24543	6.06896
TCONS_00001426	XLOC_000749	0.0917347	0	3.5177e-05	4.42731e-05	5.73007e-07	7.18473e-09	1.42599e-09	0	0.00598846	1.72091e-07	0.0721103	0.00011364
TCONS_00001427	XLOC_000749	2.69779	0.924901	17.2193	12.5406	30.3706	31.1113	9.84479	13.384	14.6421	12.9149	7.31891	5.49996
TCONS_00001428	XLOC_000749	0	0	0	0	0	0	0	0	0	0	0	0
TCONS_00001429	XLOC_000749	0	0	0	0	0	0	0	0	0	0	0	0
TCONS_00001430	XLOC_000749	0	0	0	0	0	0	0	0	0	0	0	0
TCONS_00001431	XLOC_000749	0	0	0	0	0	0	0	0	0	0	0	0
TCONS_00001432	XLOC_000749	0	0	0	0	0	0	0	0	0	0	0	0
TCONS_00001433	XLOC_000749	0	0	0	0	0	0	0	0	0	0	0	0
TCONS_00001434	XLOC_000749	0	0	0	0	0	0	0	0	0	0	0	0
TCONS_00001435	XLOC_000749	0	0	0	0	0	0	0	0	0	0	0	0
TCONS_00001436	XLOC_000749	4.93108	6.585	34.9827	29.9013	36.131	46.2098	26.105	30.5316	17.0037	23.7947	15.2919	17.9997
TCONS_00001437	XLOC_000749	0.911086	5.05628	2.43519	3.37291	3.8566e-06	1.83222	2.91352	4.30314	2.02646	2.3078	6.4808	5.7793
TCONS_00001438	XLOC_000749	0	0	0	0	0	0	0	0	0	0	0	0
TCONS_00001439	XLOC_000749	0	1.31236e-06	0	0	0	0	0	0	0	0	0	0
TCONS_00001440	XLOC_000749	5.83391e-06	2.94038e-09	0	0	0	0	0	0	0	0	0	0
TCONS_00001441	XLOC_000749	0.76007	0.756356	0.928162	2.76656	0.147139	0.611816	0.765671	3.8677	1.75456	0.561479	1.7982	1.34204
TCONS_00001442	XLOC_000749	0	0	0.36497	0	0.381562	0.433855	0	0	0	0.284788	0.300284	0.284482
TCONS_00001443	XLOC_000749	5.13746e-06	0	0	0	0	0	0	0	0	0	0	0
TCONS_00001444	XLOC_000749	1.71605e-05	0	0	0	0	0	0	0	0	0	0	0
TCONS_00001445	XLOC_000749	0.644146	0.0353367	4.24042	4.59123	17.8977	19.3882	11.4469	7.22728	10.7304	4.53793	6.32086	0.217179
TCONS_00001446	XLOC_000749	0	0	0	0	0	0	0	0	0	0	0	0
TCONS_00001447	XLOC_000749	0.884311	0	0	5.93856e-07	0	5.47338e-05	0	0	2.76957e-10	0	0.00039462	0
TCONS_00001448	XLOC_000749	0.032152	0	0	0	0	0	0	0	0	0	0	0
TCONS_00001449	XLOC_000749	1.79975	0.971693	2.95604	12.5484	1.52212	0.0801031	1.43156	4.12091	0.000742074	5.80588	6.64774	6.55724
TCONS_00001450	XLOC_000749	0	0.00342256	0	0	0	1.10114	0	0	0	6.44188e-06	3.79229e-09	0
TCONS_00001451	XLOC_000749	0	0.0902793	0	0	0	0	0	0	0	1.78554e-05	6.25394e-08	0
TCONS_00001452	XLOC_000749	0	1.70011e-09	0	0	0	0	0	0	0	0	0	0
TCONS_00001453	XLOC_000749	0	1.31976e-09	0	0	0	0	0	0	0	0	0	0
TCONS_00001454	XLOC_000749	0	0	0	0	0	0	0	0	0	0	0	0
TCONS_00001455	XLOC_000749	0	1.70011e-09	0	0	0	0	0	0	0	0	0	0
TCONS_00001456	XLOC_000749	0	0.256058	0	0	0	0	0	0	0	2.24621e-06	3.11532e-05	0
TCONS_00001457	XLOC_000749	0	4.43363e-09	0	0	0	0	0	0	0	0	0	0
TCONS_00001458	XLOC_000749	0	5.50442e-09	0	0	0	0	0	0	0	0	0	0
TCONS_00001459	XLOC_000749	0	0	0	0	0	0	0	0	0	0	0	0
TCONS_00001460	XLOC_000749	0	0.256058	0	0	0	0	0	0	0	2.24621e-06	3.11532e-05	0
TCONS_00001461	XLOC_000749	0	0	0	0	0	0	0	0	0	0	0	0
TCONS_00001462	XLOC_000750	7.72773e-08	1.43866	4.44567	5.10474	5.96104	6.81157	1.28771	6.08797	1.95068e-05	1.21622	3.00455	4.59786
TCONS_00001463	XLOC_000750	5.7556	0.0939704	0.143997	0	3.78632	2.58025	10.4784	1.07766e-07	8.87731e-06	0.0437312	8.34615e-07	0.185534
TCONS_00001464	XLOC_000750	1.51138	0.00250738	9.61047	4.4181	2.60398e-05	2.92399	0.997359	9.17538e-06	4.20034	3.82289e-05	3.27193	1.09796e-07
TCONS_00001465	XLOC_000750	15.1636	22.5868	21.0448	23.4632	26.7907	28.2055	9.50278	7.61183	6.6067	6.42344	4.34687	5.01824
TCONS_00001466	XLOC_000750	1.80275	2.37326	0	0	0	0	0	0	0	0.390217	0.312434	0.742745
TCONS_00001467	XLOC_000750	8.00636	8.1352	7.32999	7.775	5.88563	2.82634	3.49176	4.06124	4.14753	6.40127	5.51189	5.16832
TCONS_00001468	XLOC_000751	0	0.153502	0	0.195926	0	0	0	0	0	0	0.135785	0
TCONS_00001469	XLOC_000751	0	0	0.0967618	0	0.0893883	0.358908	0.165504	0.119817	0.104281	0	0	0.0510761
TCONS_00001470	XLOC_000751	0	0	0	0	0.0783654	0	0	0	0	0	0	0
TCONS_00001471	XLOC_000752	1.40546	3.09541	39.0127	43.3018	81.257	100.615	76.9904	55.3224	11.731	15.2224	9.05482	6.58287
TCONS_00001472	XLOC_000752	0	0	0	0	0	0	0	0	0.488946	0	0	0
TCONS_00001473	XLOC_000752	12.4691	17.0776	25.5027	29.2207	14.9322	13.2007	9.05666	19.2714	2.4635	4.10031	0.452768	3.85055
TCONS_00001474	XLOC_000752	0	0	0	0	0	0	0	0	4.22798e-06	0	0	0
TCONS_00001475	XLOC_000752	0	0	0	0	0	0	0	0	0.0644336	0	0	0
TCONS_00001476	XLOC_000752	0	1.1718e-05	0	0	0	0	0	1.02163	1.57221	1.99363	0	1.67804
TCONS_00001477	XLOC_000752	9.59902e-08	3.73905e-05	3.24241	0.0577475	0.00529459	0.428709	3.50046	0	1.37713e-06	1.0152	5.37142	1.2742
TCONS_00001478	XLOC_000752	17.309	12.4404	6.91632	5.51132	2.82354	2.51509	3.01546	3.25906	3.37876	3.00301	6.55615	6.19127
TCONS_00001479	XLOC_000752	0	0	0	0	0	0	0	0	0	0	0	0
TCONS_00001480	XLOC_000753	0.818093	1.13481	0	0.156579	0.146885	0	0	0.138848	0	0.204169	0.225867	0.192237
TCONS_00001481	XLOC_000753	0.0509962	4.07741e-05	0.343381	0.1761	0.0871768	0.0796041	0	0	0.616772	0	0	0
TCONS_00001482	XLOC_000754	0	0.210448	0	0	0.00275072	0.00234542	0	0.00619626	0.565607	0	0	0.279453
TCONS_00001483	XLOC_000754	0	0.210448	0	0	0.00275072	0.00234542	0	0.00619626	0.565607	0	0	0.279453
TCONS_00001484	XLOC_000754	0	0.210448	0	0	0.00275072	0.00234542	0	0.00619626	0.565607	0	0	0.279453
TCONS_00001485	XLOC_000754	1.68031	1.11634	0.803103	0.881816	0.301365	0.34518	0.583801	0.678853	1.58645	1.49155	2.42656	2.5191
TCONS_00001486	XLOC_000754	1.68031	1.11634	0.803103	0.881816	0.301365	0.34518	0.583801	0.678853	1.58645	1.49155	2.42656	2.5191
TCONS_00001487	XLOC_000754	1.68031	1.11634	0.803103	0.881816	0.301365	0.34518	0.583801	0.678853	1.58645	1.49155	2.42656	2.5191
TCONS_00001488	XLOC_000755	4.21791	5.30708	1.84578	3.78481	3.42736	4.20271	3.00208	2.63479	2.25058	2.94751	3.79928	3.914
TCONS_00001489	XLOC_000756	0.518088	0.725093	0	0	0.0310068	0	0.0291769	0	0	0	0	0
TCONS_00001490	XLOC_000757	2.47165	2.74254	0.599825	1.1007	0.360153	2.51246	2.24901	0.638909	1.75479	1.9324	7.16698	3.05179
TCONS_00001491	XLOC_000758	64.5727	69.8376	17.1281	26.8483	33.9242	27.6207	74.3739	76.5874	34.5969	33.3112	205.171	157.553
TCONS_00001492	XLOC_000759	0	0	0.547017	0	0	0	0	0	0	0	0.270602	0
TCONS_00001493	XLOC_000759	0	0	0	0	0	0	0	0	0	0	0	0
TCONS_00001494	XLOC_000759	0	0	0	0	0	0	0	0	0	0	0	0
TCONS_00001495	XLOC_000759	174.219	232.037	14.1209	13.0867	16.1046	11.9865	19.3312	16.9924	33.6634	29.8932	22.6941	27.56
TCONS_00001496	XLOC_000760	2.88599	0	2.66871	1.5514	1.32684	1.90677	1.99474	4.01467	1.9063	0.976166	3.09032	2.18785
TCONS_00001497	XLOC_000761	4.10348	4.43485	1.93182	0.781806	1.33819	0.791239	1.23832	1.22335	1.08707	1.79433	0.97524	1.5803
TCONS_00001498	XLOC_000762	0.285123	0.575585	0	0.0205993	0	0.00761744	0.476743	2.5707e-07	0	0	0.831106	0.555849
TCONS_00001499	XLOC_000762	0.916567	1.25293	2.19178	1.75265	1.10667	1.0476	1.10136	1.60831	1.57473	1.68501	1.57991	1.24171
TCONS_00001500	XLOC_000762	0	0	0	0	0	0	0	0	0	0	0	0
TCONS_00001501	XLOC_000762	0	0	0	0	0	0	0	0	0	0	0	0
TCONS_00001502	XLOC_000763	15.3237	14.9638	15.8376	18.0103	12.4814	13.8355	14.4906	16.7715	22.9903	18.9236	19.2572	20.2785
TCONS_00001503	XLOC_000764	2.76386	3.08268	1.33479	4.0109	1.27146	3.10742	2.74277	2.95239	3.71485	1.03498	2.39849	2.51452
TCONS_00001504	XLOC_000764	4.4573	4.27023	6.97103	5.15418	6.00217	5.10333	4.39284	4.99749	6.19468	7.08132	6.40507	6.54169
TCONS_00001505	XLOC_000765	17.9467	16.8127	22.2982	20.1991	19.6578	15.818	21.7395	21.3527	30.7595	26.147	22.7573	23.2428
TCONS_00001506	XLOC_000766	0	0	0	0	0	0	0	0	0	0	0	5.2886
TCONS_00001507	XLOC_000767	2.88509	3.06478	2.24713	1.88845	1.52431	1.44458	2.23184	2.33415	1.49778	2.74575	2.30983	2.79713
TCONS_00001508	XLOC_000768	1.11004	0.979135	1.41894	1.52629	1.40684	1.76063	0.827384	1.33109	0.880446	1.2445	0.822814	1.18196
TCONS_00001509	XLOC_000768	0	0	0	0	0	0	0	0	0	0	0	0
TCONS_00001510	XLOC_000769	3.53155	2.5066	0.0348833	0.0337961	0.507259	0.161736	0.0298327	0.0863899	0.0751876	0.178032	0.327908	0.263138
TCONS_00001511	XLOC_000770	13.7852	14.074	4.78025	5.23941	3.99346	4.56704	5.24437	5.34127	4.61397	5.73229	9.33716	8.84097
TCONS_00001512	XLOC_000771	0	0	0	0	0	0	0	0	0	0	0	0
TCONS_00001513	XLOC_000772	3.28989	2.39588	0	0.28605	0	0.547799	0.505605	0.243251	1.69292	0	2.37168	1.01372
TCONS_00001514	XLOC_000773	3.55684	2.14052	0.967598	0.788106	1.92222	0.754319	0.556545	0.671523	1.35646	0.94794	0.873903	0.557839
TCONS_00001515	XLOC_000774	364.35	363.299	84.9039	93.6831	192.587	178.028	149.642	135.977	118.946	115.628	159.22	168.065
TCONS_00001516	XLOC_000775	1.28862	1.8152	0	0	0.0525831	0	0	0.0477615	0	0	0.0388473	0
TCONS_00001517	XLOC_000776	3.37567	2.64496	3.064	2.27004	2.86663	3.09194	2.54331	1.93423	2.65462	3.28175	1.93628	2.53377
TCONS_00001518	XLOC_000777	7.02909	6.22768	10.0301	11.0886	16.409	14.8928	12.771	10.4643	11.3621	9.90765	10.2221	10.5073
TCONS_00001519	XLOC_000778	0.641989	0	0	0	1.27916	0	0.613654	0	0	0.76372	0.580237	0
TCONS_00001520	XLOC_000779	17.7759	16.2153	16.4609	11.9077	15.2597	15.2642	15.0161	15.4911	17.3458	20.9406	21.2208	20.6952
TCONS_00001521	XLOC_000780	10.0581	9.76558	8.36258	9.14065	8.99698	8.88133	9.50516	9.88311	11.4516	10.1251	9.28629	10.4892
TCONS_00001522	XLOC_000781	0.535077	0.178303	1.40941	1.02411	2.08153	1.79705	2.26003	1.30892	1.39235	2.30964	0.709751	0.362445
TCONS_00001523	XLOC_000782	0	0.179272	0.177134	0	0.160988	0	0	0	0	0	0.118935	0
TCONS_00001524	XLOC_000783	13.632	16.3532	11.3936	14.8518	4.89513	4.99448	3.3661	4.61729	4.91157	6.78947	11.2665	10.6545
TCONS_00001525	XLOC_000784	0.753363	0.244945	9.35903	7.16383	4.47975	8.13937	3.22792	5.39445	2.6903	2.82036	1.66592	1.21174
TCONS_00001526	XLOC_000785	0	0	0	0	0.23953	0	0	0	0	0.191951	0	0
TCONS_00001527	XLOC_000786	0	0	0	0	0	0	0	0	0	0	0	0
TCONS_00001528	XLOC_000787	10.8125	12.0538	30.1063	28.116	37.7141	48.1633	41.9839	28.8729	8.5451	9.07341	7.09702	9.29457
TCONS_00001529	XLOC_000788	0	0	0	0	0	0	0	0	0	0	0	0
TCONS_00001530	XLOC_000789	0	7.95892	0	0	0	0	0	6.49185	0	0	0	0
TCONS_00001531	XLOC_000790	0	0	0	0	0	0	0	0	0	0	0	0
TCONS_00001532	XLOC_000791	1.66433	1.96837	1.5045	1.16016	1.15335	1.38387	1.84296	2.01054	1.76951	1.92015	1.85602	1.23073
TCONS_00001533	XLOC_000792	3.97222	2.58858	1.97794	1.65272	3.63147	3.22961	3.9471	2.66083	2.57323	3.09251	2.57302	2.30481
TCONS_00001534	XLOC_000793	5.75823	6.90769	7.80775	6.61259	12.5004	9.87723	15.7425	11.4395	11.5164	12.277	20.6226	17.2329
TCONS_00001535	XLOC_000794	1.06895	2.09475	1.33061	0.399125	2.14238	1.95983	0.543434	1.06089	0.82058	1.66808	1.69916	1.40592
TCONS_00001536	XLOC_000795	0	0	0	0	0	0	0	0	0	0	0	0
TCONS_00001537	XLOC_000796	0	0	0	0	0	0	0	0	0	0	0	0.882193
TCONS_00001538	XLOC_000797	0.824911	0.412325	0.598534	0.579879	0	0.755576	0.348421	0.336321	0	0	0.27355	0.279385
TCONS_00001539	XLOC_000798	1.89556	2.73706	0.801457	1.00044	2.73206	2.60116	1.2644	0.661615	2.00728	2.58029	1.61505	1.64883
TCONS_00001540	XLOC_000799	13.0492	9.95892	14.1241	12.1643	8.86075	9.02182	11.7186	8.52364	9.09766	6.72722	6.87317	10.4648
TCONS_00001541	XLOC_000800	0	0.426543	0	0	0	0	0	0	0	0	0	0
TCONS_00001542	XLOC_000801	0.83097	0.46868	0.628737	0.34047	0.658434	0.527548	1.1253	0.556388	1.44355	1.10339	1.06607	1.03235
TCONS_00001543	XLOC_000802	1.88252	1.516	6.97306	6.70569	2.76971	5.22078	3.48973	4.56245	4.49038	3.79958	2.01152	2.62117
TCONS_00001544	XLOC_000803	0.285066	0.35622	0.140789	0.136401	0.767737	0.456936	0.180607	0.232446	0.252881	0.5127	0.378125	0.289643
TCONS_00001545	XLOC_000804	0	0	0	0	0.171368	0.172801	0.457779	0.308457	0.269194	0.51981	0.138803	0.122358
TCONS_00001546	XLOC_000805	1.22209	2.4434	2.41427	0.584755	2.19421	0	0.516179	0.498253	0	0.439592	0.405259	0.413903
TCONS_00001547	XLOC_000806	0.279433	0.279345	0	0.0668528	0	0.0639867	0.118025	0.0569633	0.0495768	0.0502569	0.138995	0.14196
TCONS_00001548	XLOC_000807	0.568305	0.634114	0.791529	0	1.37481	0	1.79142	1.29385	1.4301	1.21489	0.803768	1.25861
TCONS_00001549	XLOC_000808	4.9598	6.40437	0.816516	1.38437	1.66971	1.70359	0.698296	2.69618	1.61326	1.48672	3.56357	3.91955
TCONS_00001550	XLOC_000809	1.08779	0.543725	1.07448	3.64348	0	0.498182	1.83782	0.4435	0.771981	0.782571	2.16435	0.368419
TCONS_00001551	XLOC_000810	3.82721	4.40903	8.11305	1.27942	4.75612	1.58921	2.98473	1.91728	0.845623	1.46697	4.93101	3.10974
TCONS_00001552	XLOC_000811	3.80728	3.42547	0.752137	0.364348	0.34179	0.697455	0.321619	0	0.540387	0.2739	0.505015	0
TCONS_00001553	XLOC_000812	1.27286	1.17457	0.290142	0.0936997	0.0878986	0	0.165422	0	0.208458	0.211317	0.324688	0.132645
TCONS_00001554	XLOC_000813	4.9537	4.02614	6.36199	7.16448	7.46921	5.0715	5.6769	5.4366	5.34739	6.00002	5.34927	2.79242
TCONS_00001555	XLOC_000814	15.8605	18.5211	18.8191	18.1387	13.6449	15.6716	14.3756	17.607	13.1156	14.367	15.4281	15.9916
TCONS_00001556	XLOC_000815	0	0	0	0	0	0	0	0	0	0	0	0
TCONS_00001557	XLOC_000816	664.471	659.551	1066.39	1068.58	721.676	796.359	640.251	639.119	425.344	474.634	443.482	423.3
TCONS_00001558	XLOC_000816	4.63734	1.23794	5.4967	5.03434	4.71576	2.54264	3.65194	2.51934	3.93544	3.32983	5.0629	3.73712
TCONS_00001559	XLOC_000817	2.03715	1.4807	1.58784	1.27395	4.05839	3.2735	4.80247	4.15733	1.96152	2.82217	1.74183	1.81988
TCONS_00001560	XLOC_000817	2.03715	1.4807	1.58784	1.27395	4.05839	3.2735	4.80247	4.15733	1.96152	2.82217	1.74183	1.81988
TCONS_00001561	XLOC_000817	1.54872	2.96787	4.74227	6.81701	16.6405	14.8488	16.8331	11.8389	6.25052	8.62645	5.53484	8.0901
TCONS_00001562	XLOC_000817	1.35354	0.899617	3.21197	2.60741	8.39697	5.60773	6.50809	6.18162	4.64966	4.00302	3.73323	3.36313
TCONS_00001563	XLOC_000817	1.54872	2.96787	4.74227	6.81701	16.6405	14.8488	16.8331	11.8389	6.25052	8.62645	5.53484	8.0901
TCONS_00001564	XLOC_000817	1.35354	0.899617	3.21197	2.60741	8.39697	5.60773	6.50809	6.18162	4.64966	4.00302	3.73323	3.36313
TCONS_00001565	XLOC_000818	0	0	0	0	0	0	0	0	0.462173	0.155381	0.516463	0.602782
TCONS_00001566	XLOC_000818	0.253534	0	0	0	0	0	0	0	0	0	0	0
TCONS_00001567	XLOC_000818	2.56712	2.67814	2.26852	2.15296	1.64581	1.51631	1.62332	2.11722	1.43379	1.63701	0.625039	1.19713
TCONS_00001568	XLOC_000819	43.8738	44.3408	72.2167	72.7451	87.6785	88.1902	103.106	82.8373	89.7873	95.9337	76.8334	70.6246
TCONS_00001569	XLOC_000820	0	0	0	0	0	0	0.550138	0	0.462173	0	0	0
TCONS_00001570	XLOC_000820	23.5612	25.2961	30.7967	30.5984	35.1174	29.4741	27.4411	25.7652	14.9072	18.2737	19.4794	16.0471
TCONS_00001571	XLOC_000820	0	0	0	0.777731	0	2.24226e-07	2.1066	0	0	0	0	0
TCONS_00001572	XLOC_000821	0	0	0	0	0	0	0	0	0	0	0	0
TCONS_00001573	XLOC_000821	10.2614	10.308	0.455727	1.5812	1.11802	2.15441	1.24338	1.17517	0.700478	2.15054	1.92699	2.05606
TCONS_00001574	XLOC_000821	17.3649	18.3467	33.0496	34.3321	43.8378	39.1928	27.3888	28.6346	18.4056	18.6114	19.8351	16.959
TCONS_00001575	XLOC_000822	14.8266	17.2901	80.8134	72.0472	119.938	114.975	130.4	121.172	112.646	121.157	104.566	92.4217
TCONS_00001576	XLOC_000823	105.088	102.488	59.5417	56.8259	36.4222	41.8066	39.7498	44.4938	59.0431	57.8209	63.9063	65.0955
TCONS_00001577	XLOC_000824	11.6385	11.7222	10.1228	11.6307	7.10156	7.55242	8.5761	9.28114	15.176	12.7165	18.0838	17.5435
TCONS_00001578	XLOC_000825	4.0202	2.41615	0.496374	4.59513	1.65794	1.38086	2.49615	4.91717	1.78315	3.49503	5.89176	3.31205
TCONS_00001579	XLOC_000825	43.0748	35.8843	29.4561	27.7453	14.5011	13.6573	18.7768	22.5152	36.1539	31.9817	41.2041	36.0979
TCONS_00001580	XLOC_000825	7.13102	2.02961	5.011	0	0	2.44937	0	0.765847	3.16295	7.86902	2.72629	2.60797
TCONS_00001581	XLOC_000826	1.20401	0.411204	1.39699	0.761693	0	2.57492e-05	1.11471	0	1.29171	0.559265	0.225573	0.745074
TCONS_00001582	XLOC_000826	2.94988	2.53524	2.41146	2.72805	1.26497	2.02025	1.23038	2.05842	2.06687	2.30489	3.41549	2.9673
TCONS_00001583	XLOC_000826	0.774282	1.07718	0.335429	1.11872	0.951692	0.962499	0.265636	1.19928	0.980349	0.928004	1.27417	1.1213
TCONS_00001585	XLOC_000826	0	0	0	0.886388	0	1.12421	0.985718	0	0	0	0	0
TCONS_00001584	XLOC_000827	0	0	0	0	0	0	0	0	0	0	0	0
TCONS_00001586	XLOC_000828	14.0959	25.0591	0	1.88162	1.81358	0.907196	1.6248	0.812334	1.33716	1.40655	1.33984	2.73683
TCONS_00001587	XLOC_000828	1568.5	1502.27	38.9074	70.4196	41.6935	46.6323	33.9197	59.1657	29.7942	21.8401	44.9357	58.1224
TCONS_00001588	XLOC_000829	0.0859451	0.0933082	0.0782947	0.126672	0.227194	0.148626	0.231364	0.168338	0.0210177	2.1641	0.1269	0.111318
TCONS_00001589	XLOC_000829	0.994545	0.881113	0.873995	1.18333	2.2441	1.6953	2.72102	1.66275	1.54935	0.00141346	1.1374	1.36204
TCONS_00001590	XLOC_000830	0	1.68938	1.21752	1.97775e-05	2.97564	2.82535e-10	0.000159602	0.69791	1.01929	0.685222	0	2.23175e-09
TCONS_00001591	XLOC_000830	7.24427	4.71228	5.93628	6.81966	4.5138	6.72183	6.19916	6.18514	5.11937	4.7476	5.75922	6.34559
TCONS_00001592	XLOC_000831	66.3592	61.4624	27.1417	28.4651	40.8868	38.3189	58.9002	49.853	56.3075	49.914	49.8882	48.8118
TCONS_00001593	XLOC_000832	10.7678	13.5407	0	0	5.01043e-09	0.219616	0	0.119702	0	0	5.13381	4.54796
TCONS_00001594	XLOC_000832	0	0	0	0	0.193724	0	0	0	0	0	0	0
TCONS_00001595	XLOC_000832	0	0	0	0	0	0	0.0789725	0	0	0	0	0
TCONS_00001596	XLOC_000832	0	0	0	0	0	0	0	0	0	0	0	0
TCONS_00001597	XLOC_000832	12.3135	8.89283	6.23255	7.18454	4.9897	5.59373	6.74667	7.78603	10.4505	8.91058	12.8908	13.1458
TCONS_00001598	XLOC_000833	2.08712	0.743592	1.47256	1.14133	0	0.653864	0	1.4229	1.05799	0.6435	0.197747	0
TCONS_00001599	XLOC_000833	1.47908	1.47165	0.342096	1.54752	0.582089	0	1.00418	0	0.629248	0.755902	2.0241	2.41564
TCONS_00001600	XLOC_000834	11.8148	7.92265	0	0	0	0	0	0	0	0	0	0
TCONS_00001601	XLOC_000834	1.22126	8.25737	0	0	0.206824	0	0	0	0	0	0	0
TCONS_00001602	XLOC_000834	4.89025	1.53917e-09	0.161216	0.234288	0	0	0.344686	0.266173	0.289573	0.293545	1.24484	1.16084
TCONS_00001603	XLOC_000835	212.827	225.775	106.386	103.997	96.8827	79.7297	75.2588	81.1557	83.9949	97.8418	96.123	104.879
TCONS_00001604	XLOC_000836	3.48699	3.14958	0	0.198559	1.70505	0	0	0.726052	0	0.752008	1.40087	2.32256
TCONS_00001605	XLOC_000836	8.54631	8.35307	6.78972	6.77803	6.96861	8.35201	8.32917	6.79417	8.72932	8.59996	8.85179	7.49432
TCONS_00001606	XLOC_000837	5.18307	9.94032	12.2993	6.27311	5.21495	9.79329	8.11213	9.06918	7.16565	8.5127	6.60189	5.39199
TCONS_00001607	XLOC_000837	5.11768	0.295406	13.4298	15.3319	5.74048	11.2923	9.22671	4.81623	8.67453	4.92247	6.79364	7.09611
TCONS_00001608	XLOC_000838	2.27395	1.75981	6.95535	6.34825	4.86283	4.41553	5.05167	5.55464	3.92673	4.37882	2.65977	2.79532
TCONS_00001609	XLOC_000838	0.622633	1.10565	2.5995	2.5524	1.84227	2.03551	1.73549	1.92832	2.17104	1.33388	1.52807	1.34099
TCONS_00001612	XLOC_000838	0.743211	0.706433	4.47413	3.94419	3.4099	3.72347	1.51921	2.14772	1.4631	2.62951	1.80134	0.772179
TCONS_00001610	XLOC_000839	0	0	0	0	0	0	0	0	0	0	0	0
TCONS_00001611	XLOC_000839	0.353533	0	0	0	0	0	0	0	0	0	0	0
TCONS_00001613	XLOC_000840	16.9653	16.9226	9.59692	9.44085	6.84355	6.4348	11.2694	10.4819	9.17577	9.70489	10.5083	11.0109
TCONS_00001614	XLOC_000841	44.3307	50.0794	94.1666	79.9508	138.075	133.961	94.3477	86.1071	58.6731	70.535	62.1716	61.3234
TCONS_00001615	XLOC_000841	25.6126	20.0684	39.6581	49.0213	72.7082	62.7709	50.8743	23.7071	30.9494	27.888	31.6782	33.7606
TCONS_00001616	XLOC_000842	1.0583	1.85145	0.970685	1.5915	0.746484	0.796254	0.606643	1.01705	1.93128	2.09373	3.00811	2.2786
TCONS_00001617	XLOC_000842	1.0583	1.85145	0.970685	1.5915	0.746484	0.796254	0.606643	1.01705	1.93128	2.09373	3.00811	2.2786
TCONS_00001618	XLOC_000842	1.0583	1.85145	0.970685	1.5915	0.746484	0.796254	0.606643	1.01705	1.93128	2.09373	3.00811	2.2786
TCONS_00001619	XLOC_000842	4.52666	1.06066	1.66283	1.36015	1.79869	1.43856	1.37737	1.17383	2.2833	3.53663	3.90395	3.49617
TCONS_00001620	XLOC_000843	1.4572	2.40861	0.957835	0.977412	2.5986	1.57836	3.92418	2.29138	4.06141	3.24468	11.1092	11.3318
TCONS_00001621	XLOC_000843	0	0.0718212	0	0	0	0	0.243094	0	0.513823	0.46847	0.188274	0.146221
TCONS_00001622	XLOC_000843	0	0	0	0	0	0	0	0	0	0	0	0
TCONS_00001623	XLOC_000844	5.95806	4.66493	5.24428	3.75025	6.23053	5.74332	4.67379	5.0299	4.05105	5.84169	4.08315	4.88657
TCONS_00001624	XLOC_000845	3.00199	0.000276146	1.15553e-05	4.09951e-06	0	0	2.00266	1.76546e-08	2.70223	3.31951e-10	1.94532	1.78173e-06
TCONS_00001625	XLOC_000845	11.7721	7.39837	4.56904	14.0552	10.4885	11.6648	8.1568	9.05237	10.4284	9.31772	8.48527	9.39985
TCONS_00001626	XLOC_000845	1.37415	9.51189	9.7031	0.00160332	1.9332e-08	2.98045e-06	2.44579	5.34769	3.42407	5.80962	3.1863	5.48003
TCONS_00001627	XLOC_000846	37.4292	40.7573	19.735	25.4882	11.1736	13.2822	14.9267	21.802	16.7645	17.4642	39.6223	33.6257
TCONS_00001628	XLOC_000846	18.7277	14.5189	11.7031	5.48631	5.14665	4.90103	5.48863	4.98638	16.2742	12.923	19.5181	17.6045
TCONS_00001629	XLOC_000847	1.28527	5.34333	2.94248	1.65356	1.03356e-07	1.27591	0	2.61772	1.62064	1.28527	2.60601	1.3382e-08
TCONS_00001630	XLOC_000847	3.85581	1.19337e-08	1.33201e-08	1.65356	2.85819	2.55183	3.99792	2.61772	4.86191	5.14106	4.56052	6.05034
TCONS_00001631	XLOC_000848	3.72803	3.26616	3.15129	2.9066	2.6908	7.92477e-06	0.0552739	2.22499	1.91528	3.73261	4.19785	5.10181
TCONS_00001632	XLOC_000848	1.88004e-07	6.64662e-07	2.03428e-07	6.3697e-07	4.02163e-07	1.71282	2.36412	3.32542e-07	2.04576	0	1.22202e-06	1.75468e-07
TCONS_00001633	XLOC_000849	0	0	0	0	0	0	0	0.176804	0	0	0.152123	0
TCONS_00001634	XLOC_000850	0	0	0	0	0	0	0	0	0	0	0	0
TCONS_00001635	XLOC_000850	9.86978	7.33345	0	0	0.0851292	0.077395	0	0.0657054	0	0.0788754	0.563338	0.700974
TCONS_00001636	XLOC_000851	1.33213	2.46765	2.67482	2.25686	0.588513	0.0787985	2.0852	3.72197	4.21573	3.23722	2.40356	1.65553
TCONS_00001637	XLOC_000851	0.634547	0.634345	1.25356	1.21449	0	1.16217	0.536032	1.55225	1.80129	0.913	1.68338	1.71929
TCONS_00001638	XLOC_000852	0.754923	0.754684	0.932105	1.26428	0.423573	0.777905	0.558004	1.07725	0.535751	0.407325	0.751023	1.34232
TCONS_00001639	XLOC_000853	3.24339	3.82116	4.62299	3.56756	5.10003	4.94935	6.83835	2.85727	5.60484	4.30486	5.09449	5.0453
TCONS_00001640	XLOC_000854	33.7432	37.1576	55.1452	48.8371	134.744	139.646	161.055	74.2707	42.6989	51.9124	79.8771	58.737
TCONS_00001641	XLOC_000855	10.0145	4.23555	5.70688	6.26621	6.9156	5.64477	4.8806	4.08296	7.65373	5.54194	9.45183	9.91435
TCONS_00001642	XLOC_000856	7.49708	6.58963	4.27406	4.56158	7.56126	8.09621	4.84511	4.9976	7.50453	6.47551	8.03957	7.99361
TCONS_00001643	XLOC_000856	0	0.419313	0	0	0	0	0.354326	0.342021	0	0	0.278186	0
TCONS_00001644	XLOC_000857	8.57877	7.73178	7.0688	7.6567	11.5721	12.4176	10.6263	10.7647	16.8765	16.3405	20.2233	19.2696
TCONS_00001645	XLOC_000858	0	0	0	0	0	0	0.151369	0	0.0376134	0	0	0
TCONS_00001646	XLOC_000858	7.68338	7.47051	0.415855	0.30217	0.249323	0.439022	0.29444	0.171647	0.24736	0.323568	0.388119	0.322703
TCONS_00001647	XLOC_000859	2.6088	2.70456	2.05195	2.31162	0.824034	1.19476	1.1427	1.1818	1.95425	1.80729	1.89042	1.79984
TCONS_00001648	XLOC_000860	13.8794	12.8279	9.31217	14.2847	8.46338	9.11488	9.29121	10.0362	16.1687	10.3618	11.9841	11.1754
TCONS_00001649	XLOC_000861	1.14044	0.664264	0.864772	1.48371	1.51858	1.02953	0.761223	0.899389	0.496582	0.49794	1.23454	1.49793
TCONS_00001650	XLOC_000861	15.4748	10.3777	8.49693	3.73969	1.5616	3.28358	12.1969	14.1754	0.174731	10.6397	9.65233	14.758
TCONS_00001651	XLOC_000861	1.75346e-06	9.89592	1.21787e-06	9.44561	7.21568	8.01217	7.6012	4.51758e-06	17.2216	6.62372	5.33208	0
TCONS_00001652	XLOC_000862	22.2154	21.7867	21.1511	15.6692	17.6991	24.4929	17.8457	23.0037	21.4632	25.6492	26.9721	25.2144
TCONS_00001653	XLOC_000862	16.9706	16.6315	10.2749	17.2857	21.6874	14.3494	19.6349	14.4064	16.0417	8.57532	14.3278	16.5931
TCONS_00001654	XLOC_000863	0.371442	0.92831	0.244597	0.296217	0.38903	0.62374	0.36607	0.656236	0.659009	1.11341	1.56021	1.84509
TCONS_00001655	XLOC_000864	0	0	0	0	0	0	0	0	0	0	0	0
TCONS_00001656	XLOC_000865	3.96253	2.83635	1.57152	1.55729	0.780412	0.822804	0.832805	1.27461	1.04524	1.1146	1.67215	1.15481
TCONS_00001657	XLOC_000865	4.3566	7.31129	1.52066	0.651769	0.706193	0.654669	0.807158	1.13365	0.717331	1.20533	1.81233	1.38855
TCONS_00001658	XLOC_000865	7.61027	3.91139	2.17275	4.77931	1.56093	3.26295	1.86708	2.3745	1.43532	1.56688	2.49604	2.5226
TCONS_00001659	XLOC_000865	8.34513	13.9788	2.07736	1.4284	1.314	2.17535	1.70217	1.96678	0.858063	1.73911	2.76038	3.0618
TCONS_00001660	XLOC_000866	7.82888	9.1683	9.45729	8.90801	11.9288	12.2675	11.2078	9.60626	13.398	11.7973	10.3139	9.68983
TCONS_00001661	XLOC_000867	46.0182	43.589	40.4532	40.3283	34.7284	36.2472	31.6746	32.5441	33.2029	30.7947	45.8511	39.1319
TCONS_00001662	XLOC_000868	5.95529	5.82257	4.20667	3.8837	4.78117	5.57419	4.69947	4.09494	4.52455	3.77647	5.27767	4.13773
TCONS_00001663	XLOC_000868	0.549674	0.65858	0.265674	0	0.228045	0	0.797849	0	0.178823	0	0.705455	0.707965
TCONS_00001664	XLOC_000868	2.89809	3.1666	0.555229	0.677868	6.25942	4.91053	2.69362	1.77358	1.29813	0.957525	1.63641	1.58941
TCONS_00001665	XLOC_000868	0	0	0	0	0	0	0	0	0	0	0	0
TCONS_00001666	XLOC_000868	0	0	0	0	0.996175	0	0	0	0	0	0	0
TCONS_00001667	XLOC_000868	0	0	0	0	0	0	0	0	0	0.369825	0	0
TCONS_00001668	XLOC_000868	0	0	0	0	0	0	0	0	0	0.148765	0	0
TCONS_00001669	XLOC_000868	0	0.288622	1.22078	2.17125	0.569274	0.589217	0.84743	0.403385	0.660696	0.825313	0.21056	0.223055
TCONS_00001670	XLOC_000868	2.59669	2.04342	9.04458	6.59268	8.39194	10.1617	4.89514	5.20016	3.04043	2.60724	2.67688	3.53033
TCONS_00001671	XLOC_000868	6.57062	8.6517	0.00618528	0.00406529	0.00109228	3.14001	0.00138419	0.213823	1.02122	0.609816	2.13676	1.37452
TCONS_00001672	XLOC_000868	2.03311	1.99499	0.267866	1.273	0.00765517	1.79152	0	1.11971e-06	1.80616	0.0210383	0	0.623397
TCONS_00001673	XLOC_000868	7.19111e-05	0.0318111	1.10146e-05	0.516825	2.73791	6.73013e-05	0	0.825682	0.455174	1.59202	0.000765109	0.635217
TCONS_00001674	XLOC_000868	1.45397	1.22294	1.4074	1.21246	6.29815	2.30112	1.6966	1.04844	1.7055	1.0846	2.30607	1.2733
TCONS_00001675	XLOC_000869	1.96018	1.53966	3.18089	3.61771	2.38818	1.92367	1.18276	2.05503	1.29173	1.108	0.464299	0.853565
TCONS_00001676	XLOC_000870	0.325976	0.327747	0.0793801	0	0	0.148295	0	0	0.0585493	0.0587894	0.164165	0
TCONS_00001677	XLOC_000871	0	0	0	0	3.72862	3.17025	0.584762	0	0.982522	0.996	0.459104	0.468897
TCONS_00001678	XLOC_000872	8.72518	7.16484	7.15635	8.7474	5.57158	7.73018	7.48026	8.36391	9.38022	8.46273	9.71345	8.75972
TCONS_00001679	XLOC_000873	0.00045892	0	0	0.847785	6.53831e-05	0	0	0	0.0315817	0	0.886689	0
TCONS_00001680	XLOC_000873	6.1995	6.44814	6.45497	4.65837	4.97584	5.35637	5.06366	6.05813	6.32889	6.18729	5.29273	6.66157
TCONS_00001681	XLOC_000874	3.87638	2.52292	4.41512	3.63501	3.56273	3.96843	4.12134	3.27337	4.44087	2.75323	2.57999	2.46254
TCONS_00001682	XLOC_000875	17.9374	19.4552	23.8016	21.8445	29.7833	28.9339	29.7152	30.5989	25.9327	27.2934	25.8986	26.365
TCONS_00001683	XLOC_000876	3.15655	2.56651	2.5359	3.38323	5.47853	4.43323	5.11965	5.18209	3.97249	3.96642	4.35446	3.19297
TCONS_00001684	XLOC_000877	0.222444	0	0	0	0	0	0	0	0	0	0	0
TCONS_00001685	XLOC_000878	2.26372	1.5841	0.574976	0.526108	0.667725	0.473932	0.327818	0.50102	0.436052	0.558359	0.729228	0.854309
TCONS_00001686	XLOC_000879	1.89244	1.67355	0.79085	0.835856	1.13394	2.5334	1.04526	1.18701	2.65267	2.87998	3.33087	2.59866
TCONS_00001687	XLOC_000879	0	0	0	0	0.238245	0	0	0	0.188339	0	0	0.35953
TCONS_00001688	XLOC_000880	1.83642	3.88548	2.96265	2.49884	4.72569	0.000239915	0	1.55304	3.87016	3.75374	3.19682	2.53907
TCONS_00001689	XLOC_000880	2.76421	2.64209	1.18663	1.83943	3.4511	3.61376	4.17622	3.33057	2.38715	1.90135	2.07155	2.27848
TCONS_00001690	XLOC_000880	2.67834	0.000320414	0.000121236	0.000215595	0.000322795	2.78716	1.79799	0.000106083	0.000276582	0.00014139	0.000328005	7.07526e-05
TCONS_00001691	XLOC_000881	18.165	9.11479	23.7526	24.1236	10.1681	11.3968	16.3773	17.2725	15.6917	13.1103	12.3575	16.0359
TCONS_00001696	XLOC_000881	0.581027	10.5278	14.5402	9.20049	14.1084	13.2556	6.92985	9.59238	5.75721	10.9299	6.79287	4.72062
TCONS_00001692	XLOC_000882	9.07971	5.40411	17.1026	18.0415	6.3827	5.95751	10.2098	13.2617	11.8056	4.93673	6.3682	8.63205
TCONS_00001693	XLOC_000882	1.76609	1.8696	11.8939	4.42734	5.2847	8.55439	1.98216	10.0218	0	9.85985	5.99689	4.12944
TCONS_00001694	XLOC_000882	15.7757	18.7038	24.7007	29.0223	12.5649	19.9539	15.7778	15.5223	20.1708	20.9618	18.2222	17.6358
TCONS_00001695	XLOC_000883	0.0895831	0	0	0	0	0	0	0.0730471	0.12715	0	0	0
TCONS_00001697	XLOC_000884	0	0	0	0	0	0	0	0	0	0	0	0
TCONS_00001698	XLOC_000885	136.303	143.004	44.7041	45.9998	163.987	140.27	306.191	180.402	149.177	153.302	515.309	494.12
TCONS_00001699	XLOC_000886	1.66266	2.08915	1.72929	1.69306	1.45784	1.18352	1.22086	1.97516	1.3627	2.42206	1.83361	1.61613
TCONS_00001700	XLOC_000887	0	0	0	0	0	0.0781045	0	0	0.205481	0	0	0
TCONS_00001701	XLOC_000888	0	0.169921	3.14264	1.97417	1.15658	1.47923	1.23897	1.81097	2.18696	1.00553	0.269825	0.154027
TCONS_00001702	XLOC_000889	2.35648	3.15374	2.70794	2.8619	3.54375	3.91096	3.80284	2.16563	3.65246	5.51851	4.94248	3.69719
TCONS_00001703	XLOC_000890	23.3215	21.5177	0.308691	0.224302	0.385762	0.286248	0.263997	0.191122	0.526739	0.646378	1.63223	1.24367
TCONS_00001704	XLOC_000891	0	0.512072	0.632457	0.122549	0.344886	0.117295	0.108177	0	0.0908801	0.184254	0.169863	0.173486
TCONS_00001705	XLOC_000892	2.87084	3.63137	6.37929	7.80066	5.31664	9.66863	27.7142	42.2772	77.3179	124.233	56.8617	93.8596
TCONS_00001706	XLOC_000892	47.413	63.7567	53.4241	98.391	22.5666	41.1718	557.376	708.922	595.411	560.417	236.659	310.356
TCONS_00001707	XLOC_000893	0	0.369246	0.433338	1.41389	0	0.36007	1.06925	0.903549	0.833442	0.655977	0.253944	0.750585
TCONS_00001708	XLOC_000894	0.575519	1.15067	0.568476	0.550758	0	0.527146	2.43084	0	0	0.414035	0.763394	1.16952
TCONS_00001709	XLOC_000895	0	0.169014	0	0	0.151777	0.0774288	0	0.06893	0	0	0	0.0572607
TCONS_00001710	XLOC_000896	6.55293	6.77592	5.65089	8.53747	8.9023	9.17431	5.39895	5.1042	9.53337	6.77995	8.24513	9.09857
TCONS_00001711	XLOC_000897	6.19507	5.66603	4.1663	2.9012	4.25987	4.82925	3.00634	4.40665	4.58358	4.36197	5.94452	4.28563
TCONS_00001712	XLOC_000898	1.55792	2.0969	0.681455	0.569301	1.6733	1.64575	1.14963	1.45269	1.54573	0.863665	1.03533	1.19164
TCONS_00001713	XLOC_000899	0	0	0	0	0	0	0	0	0	0	0	0
TCONS_00001714	XLOC_000900	0.575519	1.15067	0	0	1.03332	0	0	0.469285	0.408432	0.414035	0	0.389839
TCONS_00001715	XLOC_000901	7.43833	6.84448	7.3561	7.74554	7.65823	7.36724	8.01563	6.49808	5.14768	4.83368	3.78784	4.61578
TCONS_00001716	XLOC_000902	0	0	0.143791	0.278619	0	0	0.122972	0	0.413237	0.523632	0.096547	0.197213
TCONS_00001717	XLOC_000903	3.95957	4.83794	3.47654	4.0699	3.68627	3.89541	4.21202	2.39162	2.91409	3.69258	5.44668	4.27148
TCONS_00001718	XLOC_000904	0.11236	0	0	0.107526	0	0	0	0	0	0.0808331	0	0
TCONS_00001719	XLOC_000905	0.751117	0.671839	1.32765	1.32411	1.10017	1.41218	1.23561	1.45059	0.729436	0.995403	0.943878	0.883676
TCONS_00001720	XLOC_000906	0	0	0	0	0	0	0	0	0	0	0.820619	0
TCONS_00001721	XLOC_000907	7.32913	6.54631	2.70762	3.44384	3.41849	3.03401	1.30469	4.36732	4.61283	3.76363	5.28417	4.62465
TCONS_00001722	XLOC_000908	0	0	0	0	0	0	0	0	0	0	0	0
TCONS_00001723	XLOC_000909	0	0	0	0	0	0	0	0	0	0	0	0
TCONS_00001724	XLOC_000910	0	0	0	0	0	0	0	0	0	0	0	0
TCONS_00001725	XLOC_000911	0	0	0	0	0	0	0	0	0	0	0	0
TCONS_00001726	XLOC_000912	0	0	0	0	0	0	0	0	0	0	0	0
TCONS_00001727	XLOC_000913	0	0	0	0	0	0	0	0	0	0	0	0
TCONS_00001728	XLOC_000914	5.19753	5.66823	0.93344	0.452174	0.21209	0.432788	0.399145	0.577926	0.670647	0.339924	1.09681	1.12021
TCONS_00001729	XLOC_000915	0	0	0	0	0	0	0	0	0	0	0	0
TCONS_00001730	XLOC_000916	0	0	0	0	0	0	0	0	0	0	0	0
TCONS_00001731	XLOC_000917	8.08076	9.92499	1.43125	1.93327	1.30981	1.51514	1.23251	1.63835	1.10154	1.45335	2.37398	1.74331
TCONS_00001732	XLOC_000918	5.06195	4.49809	6.66667	3.22944	6.56393	2.57583	11.878	11.0069	3.59235	5.66475	7.83347	7.2386
TCONS_00001733	XLOC_000919	1.60216	1.23817	2.90927	2.93016	3.40498	3.30808	3.91988	4.03147	3.71338	2.94269	3.06306	2.99553
TCONS_00001734	XLOC_000920	0.987424	1.23389	0	0	0.44322	0.226107	0.625593	0.402579	0.525563	0.532773	0.491162	0.334425
TCONS_00001735	XLOC_000921	2.16702	2.16633	2.1405	0	1.9454	0	0	0	0	0	1.43722	0
TCONS_00001736	XLOC_000922	1.08185	0.540753	1.06861	1.55296	0.485604	1.98184	0	2.20538	0.383881	0.778295	0.717507	0.366406
TCONS_00001737	XLOC_000923	0.19719	0.197127	0.389553	0.188706	0.531069	0.903079	0.333151	0.160791	0.279882	0.141861	0.392342	0.400711
TCONS_00001738	XLOC_000924	2.5685	2.50483	2.6981	2.44162	2.60063	2.6921	1.48436	2.34624	2.0626	3.19925	2.92475	2.98979
TCONS_00001739	XLOC_000925	0.3381	0.563552	0.221001	0.211967	0	0.204719	0.647748	0.271108	0.206055	0.628731	0.289648	0.0733747
TCONS_00001740	XLOC_000926	0.17719	0.267317	0.369373	0.451733	0.231438	0.333431	0.0399776	0.315254	0.26486	0.240262	0.323928	0.41547
TCONS_00001741	XLOC_000927	0.174243	0.3591	1.2291	1.85815	0.230874	2.17058	1.90576	1.30923	0	0.23455	2.45794	0.417271
TCONS_00001742	XLOC_000928	2.09235	3.19005	3.18664	3.88962	4.76623	4.17715	4.31142	6.59329	2.74375	3.38255	5.56878	3.67628
TCONS_00001743	XLOC_000929	0.42424	0.424105	0.139683	0.135329	1.90426	0.647636	0.836209	1.55672	1.00358	1.01734	0.468942	0.574734
TCONS_00001744	XLOC_000929	0	0	0	0	0	0	0	1.5551	0	0	0	0
TCONS_00001745	XLOC_000930	0.771102	0.43531	1.21324	0.89832	0	2.04835	0	0	1.57503	1.31275	0.763004	0.895066
TCONS_00001746	XLOC_000931	0.860776	2.86834	0.850242	1.3729	1.03032	1.57685	1.93904	1.63774	0.610872	0.825669	1.71266	2.1379
TCONS_00001747	XLOC_000932	12.9579	14.9433	20.9936	19.9254	15.3279	20.0905	29.7981	23.9843	18.7545	16.0163	14.8301	13.2757
TCONS_00001748	XLOC_000933	0	0.142497	1.49766	0	0.622054	1.73717	0.765399	0.483335	0	0	0	0
TCONS_00001749	XLOC_000934	0.697108	0	0	0	0	0	0	0	0	0	0.462338	0
TCONS_00001750	XLOC_000935	0	2.53724	1.25349	1.21442	2.27848	1.16236	2.14401	1.03478	0.900595	6.39064	3.36658	2.57879
TCONS_00001751	XLOC_000936	0	0	0	0	0	0	0	0	0	0	0	0
TCONS_00001752	XLOC_000937	0.118978	0	0.117521	0.113859	0.10681	0.0544886	0	0	0.126653	0.0855937	0.0789086	0.201479
TCONS_00001753	XLOC_000938	0.134496	0.20168	0.664251	0.643549	0.845188	0.862342	0.681692	0.658019	0.715866	0.677307	0.535206	0.819933
TCONS_00001754	XLOC_000939	0.624538	1.56085	0	0.298834	7.28865	3.43227	5.27577	5.60181	10.4157	6.73949	6.42022	7.82629
TCONS_00001755	XLOC_000940	0.668847	0	0	0	1.80133	0.612629	1.97752	1.90885	1.66132	1.20294	1.55258	2.94486
TCONS_00001756	XLOC_000941	0.661398	0.330594	0.108884	0	0	0	0	0	0.0782297	0.237909	0.877309	0.373342
TCONS_00001757	XLOC_000942	0	0	0	0	0	0	0	0	0	0	0	0
TCONS_00001758	XLOC_000943	31.021	25.7161	14.846	14.8168	6.69525	6.65476	6.84302	9.32547	21.4431	18.7986	43.682	40.0067
TCONS_00001759	XLOC_000943	6.17795	4.18769	0.705117	0.437987	0	0	0.595573	2.5494	3.34704	1.44711	6.04639	9.65878
TCONS_00001760	XLOC_000944	140.123	129.062	89.1513	94.3922	122.319	111.622	116.162	109.247	92.5407	98.5872	125.162	122.197
TCONS_00001761	XLOC_000945	16.426	15.5058	21.6308	21.3892	28.6272	22.7665	29.4199	25.0989	20.1692	20.8964	16.3251	18.4679
TCONS_00001762	XLOC_000946	4.16615	5.04245	4.86256	4.2644	3.84296	4.39767	3.40818	4.33313	5.46108	4.53525	5.64428	4.40634
TCONS_00001763	XLOC_000946	0.824911	1.0733	0.243775	0	0.730795	0.693265	0	0.213389	1.14205	0.197162	0.174346	0.91639
TCONS_00001764	XLOC_000947	0	0.176553	0.174447	0	0	0.0808823	0.0748729	0.288018	0.251366	0.254109	0.175697	0.0598147
TCONS_00001765	XLOC_000948	0	0	0.0803867	0	0	0	0	0	0	0	0.0480614	0
TCONS_00001766	XLOC_000948	0	0	0	0	0	0	0	0	0	0	0	0
TCONS_00001767	XLOC_000948	0	0	0	0	0	0	0	0	0	0	0	0
TCONS_00001768	XLOC_000948	0.300879	0	0.00281993	0.0804163	0	0	0	0	0	0.241813	0	0
TCONS_00001769	XLOC_000948	0	0.556837	0	0	0	0	0	0	0.0564713	0	0	0
TCONS_00001770	XLOC_000949	0	0	0	0.179414	0	0	0.158373	0	0.13305	0	0.124341	0.380979
TCONS_00001771	XLOC_000950	0	0	0	0	0	0	0	0	0	0	0	0
TCONS_00001772	XLOC_000950	4.22839	4.29932	3.16109	2.90816	4.46821	4.03414	5.41537	4.88356	9.62829	10.4432	12.5957	10.9205
TCONS_00001773	XLOC_000950	4.22839	4.29932	3.16109	2.90816	4.46821	4.03414	5.41537	4.88356	9.62829	10.4432	12.5957	10.9205
TCONS_00001774	XLOC_000951	1.70128	1.70074	0	0.0602994	0	0	0.212911	0.0513794	0	0	0.0417899	0.170725
TCONS_00001775	XLOC_000952	7.41418	6.78225	0.0848275	0.383524	0.282684	0.235981	0.217637	0.163395	0.284414	0.267722	0.303768	0.310248
TCONS_00001776	XLOC_000953	0	0	0	0	0	0	0	0	0	0	0	0
TCONS_00001777	XLOC_000954	85.7632	84.1085	1.33535	1.47868	0	0	1.98154	0	0.535602	0	0.763458	3.54805
TCONS_00001778	XLOC_000954	221.182	195.531	1.69393	1.95062	1.97479	2.01487	0	5.82956	2.10411	2.76943	2.38765	1.05608
TCONS_00001779	XLOC_000955	123.556	132.185	1.42741	0.691462	0.648653	0.661818	0.610372	1.76753	0.512776	1.03962	1.43763	1.95773
TCONS_00001780	XLOC_000956	246.483	158.332	0	0	0	0	0	1.45349	0	0	3.04667	0
TCONS_00001781	XLOC_000956	1.31885	90.2189	1.56348	1.63127	1.31167	1.00372	0.925693	0	0.172817	0.875941	0.0277364	1.89693
TCONS_00001782	XLOC_000957	0.532436	2.78167	1.8349	0.162179	0.747888	2.48315	1.11479	1.84597	0.713323	1.40833	2.89688	1.19536
TCONS_00001783	XLOC_000957	0	0.302652	0.481323	0.322517	0	0.232775	0	0.559785	0.237811	0	0	0
TCONS_00001784	XLOC_000957	2.88963	0.705562	0.739951	1.04659	0.755615	0	0	0.232516	0.8949	0.943837	0.346394	0.54898
TCONS_00001785	XLOC_000957	0	0	0	0	0	0	0	0	0	0	0	0
TCONS_00001786	XLOC_000958	0.42336	0.423226	0.836358	0.699796	0	0.564038	0	0.407979	1.03791	0.443011	0.510513	0.703893
TCONS_00001787	XLOC_000958	0	0	0	4.93624e-07	0.650329	0	0.46796	0	0	0	0	0
TCONS_00001788	XLOC_000959	53.9011	54.9666	1.61714	0.691632	1.17954	0.958071	0.98118	1.36703	0.932455	0.561491	8.74187	7.57377
TCONS_00001790	XLOC_000959	4.6237	5.67275	0.415192	0.402252	0.188674	0.57751	0.177539	0	0.149151	0.151197	0.557554	0.427085
TCONS_00001789	XLOC_000960	0	0	0	0	0	0	0.205457	0.198322	0.35185	0.174973	0.483921	0.329495
TCONS_00001791	XLOC_000961	0.400766	0	0.409196	1.97559	2.911	1.26886	3.25586	5.10087	32.1728	20.6268	6.56155	13.6216
TCONS_00001792	XLOC_000962	2.10853	2.05537	9.15948	8.79206	7.94986	7.76515	8.73398	9.04375	7.4969	5.31293	4.26545	3.53795
TCONS_00001793	XLOC_000963	10.3839	9.88336	10.871	11.2463	9.04285	9.682	10.6627	9.93752	10.6788	10.4226	10.4334	10.4032
TCONS_00001794	XLOC_000964	15.9105	15.8895	16.0801	15.7223	31.3204	22.2682	40.2822	31.0512	24.2351	23.099	17.2748	22.6248
TCONS_00001795	XLOC_000964	4.51569	5.28416	4.70493	3.68032	7.17786	5.16317	9.40345	7.40092	6.44807	8.66487	5.36987	6.02128
TCONS_00001796	XLOC_000965	2.89848	3.80119	3.52508	3.67826	4.75442	3.86686	5.71157	4.93187	2.97431	3.23695	3.85957	4.39617
TCONS_00001797	XLOC_000965	0	1.0824	1.3925	7.8161e-07	0.993285	0	0.597897	0.00171	0.881294	1.66602	0.0817969	0
TCONS_00001798	XLOC_000965	0	0.452165	0	0	0	0	0	0	0	0	0.600203	0
TCONS_00001799	XLOC_000965	0	0.452165	0	0	0	0	0	0	0	0	0.600203	0
TCONS_00001800	XLOC_000965	0	0.452165	0	0	0	0	0	0	0	0	0.600203	0
TCONS_00001801	XLOC_000965	8.21316	0.0204521	0.00359331	0.0129882	0	0.0026078	0.000657345	0.00467782	0	0	0.0113118	0.00612989
TCONS_00001802	XLOC_000965	0.346491	4.55778	1.19807	2.82018	0	0.915881	0.24851	1.1617	1.08422	0	2.22325	2.54914
TCONS_00001803	XLOC_000966	6.24776	6.99881	7.65941	7.33588	8.31374	9.17243	7.63593	6.97331	7.07534	7.26803	7.55262	7.0534
TCONS_00001804	XLOC_000967	5.44734	5.21139	6.0171	6.16588	4.73248	4.98948	4.50267	4.15525	5.2376	5.35158	5.0113	4.64208
TCONS_00001805	XLOC_000967	0	0	0	0	0	0	0	0	0	0	0	0
TCONS_00001806	XLOC_000968	0.56099	0.38505	0	0.368601	0.34578	0.352798	0.0393715	0.799268	0.71852	1.38549	0.766365	1.15284
TCONS_00001807	XLOC_000968	0.667997	0.610954	0.345582	0.502117	0.354634	0.160587	0.286002	0.66771	0.424534	0.126114	0.522832	0.472421
TCONS_00001808	XLOC_000969	1.54189	2.46624	3.35064	2.06577	1.3842	0.564917	0.521003	0.96781	0.656545	0.887402	1.43166	0.417771
TCONS_00001810	XLOC_000969	7.40851	3.35726	10.9714	12.1685	0.708015	2.01328	1.58828	5.03629e-08	0.524514	1.42249	2.6305	4.67176
TCONS_00001809	XLOC_000970	0	0	0.333713	0	0	0	0	0	0	0	0	0
TCONS_00001811	XLOC_000971	19.5459	17.792	0	0	0	0.252112	0.336443	0	0.000110131	0.045025	0	0.00214953
TCONS_00001812	XLOC_000971	0	0	0	0	0	0	0	0	0	0	7.35691e-09	0
TCONS_00001813	XLOC_000971	0	0	0	0.660048	0	0	0	0	0	0	0	0.119897
TCONS_00001814	XLOC_000971	0	2.51771	1.10207	0	0	0	0	0	0	0	0	0.125805
TCONS_00001815	XLOC_000971	6.24811e-10	1.40265e-06	0	0	0	0	0	6.67144e-10	2.07204e-06	0	0	0
TCONS_00001816	XLOC_000971	0	0	0.355604	0	0	0.0660315	0	0	0.126867	0	0.0798806	0
TCONS_00001817	XLOC_000971	8.827e-05	0.215451	0	0.0266855	0	0	0	0	0.145897	0.452043	0.864706	0.404944
TCONS_00001818	XLOC_000971	9.25422	11.0216	0	0.000717315	0.121366	0	0	0.0302174	4.34467e-06	0	0	0
TCONS_00001819	XLOC_000971	22.1868	27.5762	0	0	0	0.161587	0	0.4013	2.07204e-06	0	0	0
TCONS_00001820	XLOC_000971	4.57447	1.16659	0	0	0	0	0	0	0	0	1.17582e-07	0
TCONS_00001821	XLOC_000971	0	0	0	0	0	0	0	0	0	0	0.272487	0
TCONS_00001822	XLOC_000971	0	0	0	0	0	0	0.137126	0	0	0.177591	0	0
TCONS_00001823	XLOC_000971	0	0	0	0	0	0	0	0	0.00622177	0	0	0
TCONS_00001824	XLOC_000971	0	0	0	0	0	0	0	0	0	0	0	0
TCONS_00001825	XLOC_000971	0	0	0	0	0	0	0	0	0	0	0	0
TCONS_00001826	XLOC_000971	0.033546	2.78512	0	0	0	0	0.0126511	0.561522	0	0	0	0
TCONS_00001827	XLOC_000971	17.9957	18.6819	0	2.66255e-08	0.105662	0	0	0	0	0	0	0.319691
TCONS_00001828	XLOC_000971	6.25166	3.11747	0	0.642425	0	0.353921	0	0.0679024	0	0	0	0.00381192
TCONS_00001829	XLOC_000971	2.88859	3.88275	0.244124	0.0712503	0	0	0	0	0	0	0	0
TCONS_00001830	XLOC_000971	0	0	0	0.0812059	0	0	0	0	0	0	0	0
TCONS_00001831	XLOC_000971	0.629438	3.50489e-07	0	3.90228e-05	0	0	0	0	0	0	0	0.463284
TCONS_00001832	XLOC_000971	6.2638	0.00216081	0	0.000426336	0.354599	0.0602471	0	0	0	0	0.494506	0
TCONS_00001833	XLOC_000971	0	0	0	0	0	0	0.653663	0	0	0	0	0
TCONS_00001834	XLOC_000971	0	0	0	0	0	0	0	0	0	0	0.304719	0
TCONS_00001835	XLOC_000971	6.4809	6.43001	0	3.05965e-09	0	0	0	0.198196	0	0.143405	0.83885	0.329155
TCONS_00001836	XLOC_000971	0.787368	0	0	0	0.0139389	0	0.195427	0.402522	0.383208	0	0	0
TCONS_00001837	XLOC_000971	2.52299	1.4883	0	0	0	0	0	0	0.268938	0	0	0
TCONS_00001838	XLOC_000972	2.77081	3.96745	0.829694	0.663176	0.837488	0.684809	0.792597	0.8355	0.748814	0.674659	1.2155	1.24818
TCONS_00001839	XLOC_000973	78.9606	84.1114	0.840006	0.729895	1.03398	0.69052	0.487217	0.387713	0.487338	0.627139	1.73092	1.11696
TCONS_00001840	XLOC_000973	17.2712	17.9081	0.0757261	0.176771	0	0	0.116682	0.322778	0	0	0.692187	0.198188
TCONS_00001841	XLOC_000973	3.8416	9.39125	0	0	0	0	0.0303825	0.0497353	0.102375	0.106522	0.117159	0.306948
TCONS_00001842	XLOC_000974	100.416	108.824	126.201	121.926	181.414	181.61	160.763	126.869	104.764	110.649	134.182	130.359
TCONS_00001843	XLOC_000974	0.912412	2.29905e-05	0.167285	0.0810354	0	0.0775612	0.214691	0.0690479	0.120189	0	0.505447	0
TCONS_00001846	XLOC_000974	2.47473	4.43684	0	0	0	0	0	0	0	0.114034	0	0.590533
TCONS_00001844	XLOC_000975	0.498059	0	0	0	0.111781	0	0	0	0	0	0.165162	0.0843425
TCONS_00001845	XLOC_000975	0	0	0	0	0	0	0	0	0	0	0	0
TCONS_00001847	XLOC_000976	18.5936	21.7407	8.51852	5.74123	13.4524	19.2328	16.154	8.10708	11.2524	10.8371	11.4394	16.0011
TCONS_00001848	XLOC_000976	45.1581	43.4737	14.0195	20.7324	25.9763	21.4268	13.664	16.7405	15.7676	13.132	22.2684	21.5633
TCONS_00001849	XLOC_000977	7.7623	7.59984	0.446546	0.765807	1.26147	0.644336	0	0.391513	0	0	1.2581	0.596261
TCONS_00001850	XLOC_000977	0	0	0.287641	0	1.04864	0.494287	0.220248	0	0.43174	0.375139	0.305214	0
TCONS_00001851	XLOC_000978	3.73974	3.95131	1.37981	1.34469	1.30863	0.887552	1.45181	1.55285	1.48934	1.53001	2.41473	1.70112
TCONS_00001852	XLOC_000979	17.9942	18.6999	18.678	19.5472	23.0672	20.6893	31.1312	25.4193	19.6748	20.7243	16.5051	15.2914
TCONS_00001853	XLOC_000980	0.343755	0.00140942	0.213705	0	0	0	0.399888	1.94909	0.385971	1.19412	0.805998	1.65763
TCONS_00001854	XLOC_000980	0	1.05653	1.48415	0.182806	1.20799	0.486552	1.63285	1.38569	1.06297	0.465167	1.28834	1.16126
TCONS_00001855	XLOC_000980	0	0	0	0.637578	0	0	0	0.385742	0.512996	0	0	0.741451
TCONS_00001856	XLOC_000980	1.3252	0.836584	4.18387	3.44472	3.21258	3.39457	6.07926	2.42281	6.4543	6.28692	4.4482	2.83998
TCONS_00001857	XLOC_000980	0	0	0	0	0.515237	0	0	0	0.279946	0.679282	0.535739	0.454795
TCONS_00001858	XLOC_000980	0.00496563	0.00498483	0.0170186	0.0210374	0.0172754	0.0131443	0.0219532	0.0130285	0.0355729	0.0244441	0.0298555	0.00937004
TCONS_00001859	XLOC_000980	0	0.404572	0.320539	0.454604	0.233221	0.0925885	0.476994	0.801935	0.330475	0.534255	0.101731	0
TCONS_00001860	XLOC_000981	79.6544	60.579	1.22205	2.84618	3.42518	2.79077	2.10964	3.9181	0.553842	1.677	1.05662	2.64434
TCONS_00001861	XLOC_000982	15.0636	18.2856	13.5507	12.0987	6.03706	6.65235	9.54369	11.1863	11.0721	13.3526	12.4881	14.3944
TCONS_00001862	XLOC_000982	3.60963	0.858966	3.95076	7.2941	6.10694	5.73812	5.15495	3.43444	5.07874	2.75258	5.03312	1.99139
TCONS_00001863	XLOC_000983	0.493754	0	0.096917	0.661342	0	0	0	0	5.86711e-06	0.60806	1.63419	1.72715
TCONS_00001864	XLOC_000984	60.4174	66.4701	49.241	49.0962	41.1801	45.0339	47.9201	43.4321	55.0935	52.418	46.284	44.434
TCONS_00001865	XLOC_000985	54.2758	53.72	21.1076	18.1298	73.712	70.7671	47.0628	55.0926	69.6768	72.1506	78.3357	76.3879
TCONS_00001866	XLOC_000986	12.5266	11.6038	10.0409	11.7455	9.80906	9.40518	11.4614	13.9206	22.4705	15.6093	16.6788	19.8436
TCONS_00001867	XLOC_000986	0.0525375	1.43578	0.0280603	0	3.08462	3.00903	2.15252	1.00502	7.78772e-06	3.49371	2.43621	2.37265
TCONS_00001868	XLOC_000986	0	0.532018	0	0	0	0	0	0	0	0	0	0
TCONS_00001869	XLOC_000986	4.28046e-06	9.17644e-07	0.000141747	9.53728e-05	2.2155e-07	1.16578e-05	0.0341446	0.000151347	9.44336e-05	5.49823e-07	3.97255e-05	6.02405e-07
TCONS_00001870	XLOC_000986	0	4.06907e-07	0	0	0	0	0	0	0	0	0	0
TCONS_00001871	XLOC_000986	4.54246	4.40819	4.6872	4.55639	3.45202	3.62367	3.56199	4.10031	7.46135	5.74761	6.4443	6.05205
TCONS_00001872	XLOC_000986	4.54246	4.40819	4.6872	4.55639	3.45202	3.62367	3.56199	4.10031	7.46135	5.74761	6.4443	6.05205
TCONS_00001873	XLOC_000986	4.54246	4.40819	4.6872	4.55639	3.45202	3.62367	3.56199	4.10031	7.46135	5.74761	6.4443	6.05205
TCONS_00001874	XLOC_000986	9.04947e-07	5.50027e-07	2.66981e-05	5.82838e-08	1.79171e-07	9.59862e-06	0.0237857	7.58705e-05	1.0507e-06	4.03463e-07	2.50947e-05	3.61342e-07
TCONS_00001875	XLOC_000986	9.04947e-07	5.50027e-07	2.66981e-05	5.82838e-08	1.79171e-07	9.59862e-06	0.0237857	7.58705e-05	1.0507e-06	4.03463e-07	2.50947e-05	3.61342e-07
TCONS_00001876	XLOC_000986	0	0.0608154	0.00190862	0.239891	0.514749	0.13567	1.37989	0.0972832	0.336954	1.71032	0.051537	1.19002
TCONS_00001877	XLOC_000986	0	0.0380914	0.00115449	0.150593	0.319403	0.0816966	0.825649	0.0603645	0.209552	1.03029	0.0326328	0.706192
TCONS_00001878	XLOC_000986	0	0.0380914	0.00115449	0.150593	0.319403	0.0816966	0.825649	0.0603645	0.209552	1.03029	0.0326328	0.706192
TCONS_00001879	XLOC_000986	0	0.349846	0.484281	0.0945519	0.198226	1.4825	0.494117	0.037463	0.503851	0.62076	0.0810189	0.419157
TCONS_00001880	XLOC_000986	0	2.5611e-09	0	0	0	0	0	1.39213e-05	0	3.31312e-07	0	0
TCONS_00001881	XLOC_000986	0	2.5611e-09	0	0	0	0	0	1.39213e-05	0	3.31312e-07	0	0
TCONS_00001882	XLOC_000986	0	0	0	0	0	0	0	0	0	0	0	0
TCONS_00001883	XLOC_000986	0	6.95957e-08	0	0	0	0	0	0	0	0	0	0
TCONS_00001884	XLOC_000986	0	6.95957e-08	0	0	0	0	0	0	0	0	0	0
TCONS_00001885	XLOC_000986	0	6.95957e-08	0	0	0	0	0	0	0	0	0	0
TCONS_00001886	XLOC_000986	0	0	0	0	0	0	0	0	0	0	0	0
TCONS_00001887	XLOC_000986	0	6.95957e-08	0	0	0	0	0	0	0	0	0	0
TCONS_00001888	XLOC_000986	0	6.95957e-08	0	0	0	0	0	0	0	0	0	0
TCONS_00001889	XLOC_000986	0	6.95957e-08	0	0	0	0	0	0	0	0	0	0
TCONS_00001890	XLOC_000986	0	6.95957e-08	0	0	0	0	0	0	0	0	0	0
TCONS_00001891	XLOC_000986	0	6.95957e-08	0	0	0	0	0	0	0	0	0	0
TCONS_00001892	XLOC_000986	0	6.95957e-08	0	0	0	0	0	0	0	0	0	0
TCONS_00001893	XLOC_000986	0	0	0	0	0	0	0	0	0	0	0	0
TCONS_00001894	XLOC_000986	0	0	0	0	0	0	0	0	0	0	0	0
TCONS_00001895	XLOC_000986	0	6.95957e-08	0	0	0	0	0	0	0	0	0	0
TCONS_00001896	XLOC_000986	0	0	0	0	0	0	0	0	0	0	0	0
TCONS_00001897	XLOC_000986	0	0	0	0	0	0	0	0	0	0	0	0
TCONS_00001898	XLOC_000986	0	0	0	0	0	0	0	0	0	0	0	0
TCONS_00001899	XLOC_000986	0	6.95957e-08	0	0	0	0	0	0	0	0	0	0
TCONS_00001900	XLOC_000986	0	0	0	0	0	0	0	0.161138	0	0	0	0
TCONS_00001901	XLOC_000986	0	0	0	0	0	0	0	0.161138	0	0	0	0
TCONS_00001902	XLOC_000986	0	0	0	0	0	0	0	0.161138	0	0	0	0
TCONS_00001903	XLOC_000986	0	0	0	0	0	0	0	0	0	0	0.271153	0.542087
TCONS_00001904	XLOC_000986	0	3.43625	6.84815	2.29274	1.98831	1.32536	0	0.481291	4.91105	0.8265	2.40524	7.76449
TCONS_00001905	XLOC_000986	0	0	0	0	0.0321185	0	0	0	1.39647e-06	0	0	0
TCONS_00001906	XLOC_000986	0	0	0	0	2.51752e-06	0	0	0	8.60375e-10	0	0	0
TCONS_00001907	XLOC_000986	0	0	0	0	1.22012e-06	0	0	0	4.18408e-10	0	0	0
TCONS_00001908	XLOC_000986	0	0	0	0	2.86945e-07	0	0	0	7.44859e-10	0	0	0
TCONS_00001909	XLOC_000986	0.915691	3.82358	0.617754	1.28196	2.45576	1.63401	1.52331	1.71322	1.91773	1.11983	2.35792	1.59958
TCONS_00001910	XLOC_000986	0	0	0	0	0	0	0	0	0	0	0	0
TCONS_00001911	XLOC_000986	0	0	0	0	0	0	0	0	0	0	0	0
TCONS_00001912	XLOC_000986	0	0	0	0	0	0	0	0	0	0	0	0
TCONS_00001913	XLOC_000987	1.57543	1.57493	3.11229	2.01019	3.30005	2.64552	6.43238	4.06797	5.77655	4.15572	3.30872	3.55715
TCONS_00001914	XLOC_000988	0	0	0	0	0	0	1.79899	0	4.62303	1.10927e-09	0.846199	0.940331
TCONS_00001915	XLOC_000988	5.91682	6.1966	9.46237	10.7852	9.52733	9.3766	12.7077	13.8613	9.00975	13.3104	9.30118	8.3415
TCONS_00001916	XLOC_000989	0	0.264141	0	0	0.0745191	0	0	0	0	0	0	0
TCONS_00001917	XLOC_000989	0	0.0410092	0	0	0.0111457	0	0	0	0	0	0	0
TCONS_00001918	XLOC_000989	0	0.0410092	0	0	0.0111457	0	0	0	0	0	0	0
TCONS_00001919	XLOC_000989	0.417382	0	0	0	0	0.201805	0	0	0	0	0.0999268	0
TCONS_00001920	XLOC_000990	0	0	0	0	0	0	0	0	0	0	0	0
TCONS_00001921	XLOC_000991	0.217389	0	0.431547	0	0	0	0	0	0	0	0	0
TCONS_00001922	XLOC_000992	774.038	748.973	530.931	519.873	359.776	395.674	324.372	339.914	329.814	305.43	353.323	371.124
TCONS_00001923	XLOC_000992	34.7331	46.8748	42.885	38.2245	46.7713	20.6789	11.7363	16.9931	24.6492	14.9924	19.5804	23.5271
TCONS_00001924	XLOC_000993	1.69939	1.48649	0.839294	0.406568	1.14419	1.16741	1.54629	1.55891	3.01503	1.22256	2.18998	2.55275
TCONS_00001925	XLOC_000993	0.589632	1.53578	0.995106	1.61864	0.910727	0.612739	3.05388e-07	0.166713	0.233889	1.23203	0	0
TCONS_00001926	XLOC_000994	0	0	0	0	0	0	0	0	0.467247	0	0	0
TCONS_00001927	XLOC_000994	0	0	0	0	0.363696	0	0	0	0	0	0	0
TCONS_00001928	XLOC_000995	0	0	0	0	0	0	0	0	0	0.420345	0	0
TCONS_00001929	XLOC_000995	0.0897455	0.448585	0.797824	1.1165	4.91459	2.21946	20.0902	15.7336	118.719	65.192	29.5225	48.0856
TCONS_00001930	XLOC_000996	0	0.0416139	0	0	0	0	0.0351644	0	0	0	0.027608	0
TCONS_00001931	XLOC_000997	0.940531	1.15076	0.31655	1.67165	0.695261	1.57611	0.46396	0.49348	0.765942	1.22985	0.876302	1.21573
TCONS_00001932	XLOC_000998	0.894097	1.0215	0.50466	0.122233	0.343996	0.818947	0.107898	0.104151	0.362582	0.551334	0.423561	0.173038
TCONS_00001933	XLOC_000999	3.27911	3.42816	14.0529	9.58661	14.0552	17.459	5.78968	6.96529	2.56433	5.53035	3.64268	3.03121
TCONS_00001934	XLOC_001000	1.60958	2.13202	7.55194	9.58856	6.03274	7.70319	3.84112	4.4624	4.19788	3.6186	1.78808	2.3441
TCONS_00001935	XLOC_001001	2.48367	2.52559	3.60734	3.54525	3.03993	4.3171	3.8886	2.23344	1.9206	2.32742	3.14731	3.67698
TCONS_00001936	XLOC_001002	6.64627	7.40361	0.525687	1.58006	0.557593	0.951993	1.91125	2.22429	2.82304	0.765742	5.00697	4.59094
TCONS_00001937	XLOC_001002	0	0	0.88093	0	0	0	0	0	3.01922e-09	1.97028	0	0
TCONS_00001938	XLOC_001003	13.3169	10.5404	0	0.166779	0.782267	0.877958	1.76664	1.49213	4.39064	3.10471	11.1539	12.2182
TCONS_00001939	XLOC_001003	0.669495	0	0.107095	0	0	0	0	0	0	1.36297	0	0
TCONS_00001940	XLOC_001003	0	0	0	0	0	0	0	0	0	0	0	0
TCONS_00001941	XLOC_001004	3.76054	3.42103	6.21493	7.57906	5.00588	7.00307	4.05484	4.25299	4.58748	3.68159	2.99707	4.44554
TCONS_00001942	XLOC_001005	5.91709e-05	0.81377	0	1.20462	8.12647e-10	0	1.76347e-05	0	0.0204971	0	7.21203e-09	1.14965
TCONS_00001943	XLOC_001005	8.28883	7.08846	8.78757	6.86174	4.753	4.53147	6.70872	6.08651	8.04875	6.71241	7.2243	6.14963
TCONS_00001944	XLOC_001006	9.11908	8.10659	7.55363	9.19405	7.34285	7.65623	8.06862	7.81644	7.46813	7.85813	6.4717	8.52469
TCONS_00001945	XLOC_001006	1.20746	1.66893	2.25067	0.913619	1.52547	1.78439	0.671725	1.1811	0.724676	1.4891	1.73642	0.846835
TCONS_00001946	XLOC_001006	0.102217	0.613415	0.284197	1.06651	0.482513	0.72481	0.814048	0.801676	0.379635	0.442304	0.643217	0.660141
TCONS_00001947	XLOC_001006	0	2.08719e-08	1.67865e-07	0	0	1.55822e-07	0	0	0	0	0	0
TCONS_00001948	XLOC_001007	6.71812	5.64758	6.22447	6.11378	4.67912	5.77013	0.526199	6.29318	6.23936	6.25366	7.65361	6.80292
TCONS_00001949	XLOC_001007	1.2682	1.22439	1.20415	1.33523	0.983829	1.09997	6.5893	1.3232	1.32156	1.19361	1.71929	1.23635
TCONS_00001950	XLOC_001007	2.72763e-05	1.32488e-05	0.000607856	5.5556e-05	3.08048e-06	0.000510275	7.91169e-06	0.000229261	0.000663314	9.81734e-08	5.54834e-06	5.73793e-06
TCONS_00001951	XLOC_001008	0.925292	1.97761	4.28266	1.44043	0	0.104069	0	1.0252	0.2831	0.309192	1.10591	0
TCONS_00001952	XLOC_001008	7.16849	2.63903	5.20818	13.3886	1.83298	1.72964	2.22806	1.1438	0.500378	2.34189	1.59128	1.43282
TCONS_00001953	XLOC_001009	0	0	0.14572	0	0	0	0	0	0	0	0	0
TCONS_00001954	XLOC_001009	0	0.31217	0	0.149417	0	0	0	0	0	0	0	0
TCONS_00001955	XLOC_001009	0	0.172701	0	0	0	0	0	0	0	0	0	0
TCONS_00001956	XLOC_001010	0	0	0	0	0	0	0	0	0	0	0	0
TCONS_00001957	XLOC_001010	0	0	0	0	0	0	0	0	0	0	0	0
TCONS_00001958	XLOC_001010	0.0461488	0.0922684	0	0	0	0.04227	0.0389841	0.0752606	0	0	0	0.0625196
TCONS_00001959	XLOC_001010	3.48893e-09	2.72182e-08	0	0	0	3.51903e-09	2.64439e-09	1.64271e-08	0	0	0	3.25341e-09
TCONS_00001960	XLOC_001010	0	0	0	0	0	0	0	0	0	0	0	0
TCONS_00001961	XLOC_001011	0.0530638	0	0	0	0	0	0	0	0	0	0	0.0335213
TCONS_00001962	XLOC_001011	0.0530638	0	0	0	0	0	0	0	0	0	0	0.0335213
TCONS_00001966	XLOC_001011	0	0.151329	0	0.0864328	0.377122	0.165455	0.166519	0.110717	0.192291	0.389858	0.119803	0.179732
TCONS_00001967	XLOC_001011	0.112647	0	0.31658	0.0283017	0	0.696832	0	0.222927	0.493239	0.0137885	0.265626	0
TCONS_00001963	XLOC_001012	2.0587	2.48681	1.81098	2.40899	5.82122	4.16418	3.34445	3.0776	2.83206	4.44238	3.71209	3.13763
TCONS_00001964	XLOC_001013	0.115845	0	0.0981705	0.0951108	0.267667	0.455166	0.0839568	0.243124	0.328849	0.286	0.0659156	0.134643
TCONS_00001965	XLOC_001013	0	0.163432	0.103683	0.061339	0.539534	0.0689327	0.01962	0.0901424	0	0.125642	0.178043	0.252942
TCONS_00001968	XLOC_001014	138.526	142.439	2.4538	1.73263	2.68373	2.46824	2.56091	3.36464	2.53989	2.45357	2.68081	2.25314
TCONS_00001969	XLOC_001015	50.3006	49.0771	18.0021	23.1795	41.5665	39.1109	78.5671	68.1106	69.0906	83.9124	64.1353	61.1291
TCONS_00001970	XLOC_001015	41.4456	35.3862	41.9925	37.8929	47.6019	50.5296	63.7142	60.8782	68.9733	52.764	20.9241	35.6027
TCONS_00001971	XLOC_001015	0	0	0	0	0	0	0	0	0.280071	0	0	0
TCONS_00001972	XLOC_001015	0	0	0	0	0	0	0	0	0.244185	0	0	0
TCONS_00001973	XLOC_001016	1.76242	3.96419	1.88592	0.421648	1.18663	0.403572	0.868467	0.718549	1.04229	1.37356	3.11701	2.28813
TCONS_00001974	XLOC_001017	0	0.0313894	1.25191	1.2512	1.7986	0	1.26862	0	0	1.41329	0	2.01753
TCONS_00001975	XLOC_001017	7.02736	5.89125	4.37013e-05	9.3174e-05	0.000105649	1.72813	3.54704e-05	1.89741	1.16042	4.53515e-05	1.83093	4.76685e-05
TCONS_00001976	XLOC_001017	4.598	6.89072	0	0.102876	0.0971812	0	0.165018	0	0	0	0.0633531	0
TCONS_00001977	XLOC_001018	3.31699	3.83608	2.50548	2.11618	4.08711	3.78484	3.35143	3.5676	3.23096	5.05329	6.3207	6.9167
TCONS_00001978	XLOC_001019	8.78953	8.46787	6.25101	7.47035	14.0453	13.19	14.311	13.5431	16.2181	11.6222	13.549	15.7505
TCONS_00001979	XLOC_001020	2.55857	2.50473	2.63975	2.57423	1.78013	1.85082	2.53274	3.1559	4.06105	2.73643	4.81266	4.69816
TCONS_00001980	XLOC_001020	0	0	0	0.3364	0	0	0	0	0	0.359042	0.827038	0.210634
TCONS_00001981	XLOC_001021	0.721942	0.454524	0.434116	0.3667	0.381982	0.151362	0.0960878	0.0893516	0.156273	0.435647	0.563036	0.423207
TCONS_00001982	XLOC_001021	0	0.108803	0.122493	0	0	0.364781	0.221259	0.216975	0.243634	0.104877	0.184424	0.46743
TCONS_00001983	XLOC_001021	0	1.40365	0	0	0	0	1.4741	0	0	0	0.669738	0.835862
TCONS_00001984	XLOC_001022	0	1.4952	2.08707	1.3834	1.60724	1.93154	2.35066	3.4425	1.04465	1.5401	1.43693	1.45261
TCONS_00001985	XLOC_001023	2.75683	3.52505	2.72309	3.12905	2.1871	3.11235	2.00387	2.77073	3.09393	2.90575	3.61426	2.86623
TCONS_00001986	XLOC_001024	2.14676	1.87582	1.88487	1.59786	0.856535	1.0924	1.00748	0.972494	1.5235	0.858	1.89837	2.10043
TCONS_00001987	XLOC_001025	22.3198	20.9325	6.04577	5.24078	2.4375	3.03495	3.92641	6.04158	3.82115	3.77424	4.60876	5.01879
[truncated: 71,869 more rows]
