# Supplementary material for: Pattern regulation in a regenerating jellyfish
Source: eLife. 2020 Sep 7;9:e54868. doi: 10.7554/eLife.54868 (PMC7524552; doi:10.7554/eLife.54868)
Supplement: Figure 10—source data 2. [file elife-54868-fig10-data2.xlsx]

## Sheet: Figure 10E-rep1
	PKF/Control qPCR experiments - Biological replicate 1						PKF/Control qPCR experiments - Biological replicate 1
		SampleName	CP	Average CP	Relative quantity		related to eF1alpha	EF1alpha	Wnt6	Wnt3	Axin	ßcat	FoxA	Bra1
	Bra1	PKF 48hpd	29.5116	29.5548	12.6801		Control 48hpd	1	0.00338542	0.000521808	0.010537	0.0322908	0.0126928	0.00184505
			29.5914				PKF 48hpd	1	0.00195482	0.000162822	0.00494581	0.0289502	0.00352956	0.000284823
			29.5875				PKF/Control (fold change)		-1.73183	-3.20477	-2.13048	-1.11539	-3.59614	-6.47788
			29.5287
		control 48hpd	26.2056	26.2501	125.294
			26.1324
			26.0671
			26.5953
	FoxA	PKF 48hpd	25.8948	25.9234	157.134
			26.0618
			25.8947
			25.8424
		control 48hpd	23.3702	23.4678	861.942
			23.5734
			23.5043
			23.4234
	ßcat	PKF 48hpd	22.9217	22.8874	1288.84
			23.0265
			22.8389
			22.7626
		control 48hpd	22.1932	22.1207	2192.8
			22.1807
			22.0148
			22.0942
	Axin	PKF 48hpd	25.4775	25.4367	220.184
			25.4654
			25.4086
			25.3953
		control 48hpd	23.6713	23.7364	715.544
			23.6861
			23.791
			23.7971
	Wnt3	PKF 48hpd	30.0034	30.3616	7.24874
			30.5349
			30.441
			30.4669
		control 48hpd	28.2301	28.0722	35.4349
			28.1049
			28.0875
			27.8662
	Wnt6	PKF 48hpd	26.8246	26.7759	87.0272
			26.743
			26.8791
			26.6568
		control 48hpd	25.4395	25.3744	229.897
			25.2803
			25.3401
			25.4378
	eF1alpha	PKF 48hpd	17.7752	17.7771	44519.3
			17.8118
			17.7863
			17.7353
		control 48hpd	17.3012	17.168	67908
			17.2561
			17.0199
			17.0947

## Sheet: Figure 10E-rep2
	PKF/Control qPCR experiments - Biological replicate 2						PKF/Control qPCR experiments - Biological replicate 2
		SampleName	CrossingPoint	Average CP	Relative quantity		related to eF1alpha	EF1alpha	Wnt6	Wnt3	Axin	ßcat	FoxA	Bra1
	eF1alpha	control 48hpd	18.049	18.0674	36405.7		Control 48hpd	1	0.00238257	0.00113091	0.0152047	0.0394973	0.0141815	0.00205882
			18.098				PKF 48hpd	1	0.00269521	0.000333211	0.00719579	0.0190985	0.00541533	0.000343474
			18.0879				PKF/Control (fold change)		1.13122	-3.39397	-2.11301	-2.06809	-2.61877	-5.99412
			18.0347
		PKF 48hpd	18.9249	18.8799	20729.5
			18.7205
			19.1969
			18.6772
	Wnt6	control 48hpd	26.9255	26.7807	86.7389
			26.6588
			26.8087
			26.7297
		PKF 48hpd	27.3335	27.4153	55.8704
			27.2318
			27.3536
			27.7422
	Wnt3	control 48hpd	27.8967	27.8557	41.1714
			27.7619
			27.8408
			27.9234
		PKF 48hpd	30.4371	30.4312	6.90729
			30.4495
			30.4145
			30.4236
	Axin	control 48hpd	24.1066	24.1067	553.539
			24.1564
			24.0781
			24.0857
		PKF 48hpd	26.0892	25.9985	149.165
			26.0391
			25.833
			26.0329
	ßcat	control 48hpd	22.4875	22.7295	1437.93
			22.9065
			22.6058
			22.9181
		PKF 48hpd	23.3883	24.5903	395.901
			26.5003
			24.9498
			23.5228
	FoxA	control 48hpd	23.9233	24.2073	516.286
			23.9644
			23.8419
			25.0995
		PKF 48hpd	26.4822	26.4086	112.257
			26.4481
			26.4414
			26.2628
	Bra1	control 48hpd	27.0754	26.9914	74.9528
			26.7344
			27.1224
			27.0333
		PKF 48hpd	29.5565	30.3874	7.12003
			31.8264
			30.7864
			29.3802

## Sheet: Figure 11C,11S1-rep1&2
	Blebbistatin (Bleb.)/Control qPCR experiments - Biological replicate 1
		CP	CP	CP	CP	Average CP	CP	CP	CP	CP	Average CP	Relative quantity
		eF1alpha	eF1alpha	eF1alpha	eF1alpha	eF1alpha	Wnt6	Wnt6	Wnt6	Wnt6	Wnt6	eF1alpha	Wnt6	Wnt6 relative to control ND 8h f & to eF1alpha	Wnt6 ratio: f/F
	control n.d. f	25.5417	25.2788	25.187	25.1588	25.2916	40.308	41.2881	39.0272	40.1733	40.1992	243.487	0.00792224	1	1.08209
	control n.d. F	17.7291	17.6408	17.6734	17.7338	17.6943	32.6248	32.7418	32.5602	32.9358	32.7157	47151.5	1.41777	0.924139
	Bleb. n.d. 8h f	19.5614	19.1946	19.4277	19.5038	19.4219	27.4591	27.3001	27.402	27.5416	27.4257	14237.3	55.4675	119.74	1.26091
	Bleb. n.d. 8h F	18.5613	18.3117	18.5191	18.4818	18.4685	26.6234	26.8397	26.8279	26.9359	26.8067	27570.2	85.1857	94.9631
	Control S 8h f	20.1808	20.2195	20.2845	20.2406	20.2314	27.4259	27.3732	27.3433	27.6285	27.4427	8123.71	54.8166	207.389	165.62
	Control S 8h F	18.533	18.5528	18.7813	18.687	18.6385	33.4869	32.7876	33.0503	33.5617	33.2216	24504.5	0.998371	1.2522
	Bleb. S 8h f	19.8481	19.5516	19.1401	19.4227	19.4907	27.504	27.2026	27.25	27.7203	27.4192	13574.7	55.7168	126.149	4.96434
	Bleb. S 8h F	19.497	19.4454	19.297	19.498	19.4344	29.5975	29.6094	29.6484	29.8429	29.6745	14114.8	11.67	25.4111
	Blebbistatin (Bleb.)/Control qPCR experiments - Biological replicate 2
		CP	CP	CP	CP	Average CP	CP	CP	CP	CP	Average CP	Relative quantity
		eF1alpha	eF1alpha	eF1alpha	eF1alpha	eF1alpha	Wnt6	Wnt6	Wnt6	Wnt6	Wnt6	eF1alpha	Wnt6	Wnt6 relative to control ND 8h f & to eF1alpha	Wnt6 ratio: f/F
	control n.d. f	19.9182	19.9179	19.649	19.8001	19.8213	34.5306	34.6783	34.6634	34.8689	34.6853	10794.5	0.361971	1	0.988063
	control n.d. F	18.5322	18.2178	18.3641	18.5315	18.4114	32.9729	33.4951	33.1402	33.4244	33.2582	28682.2	0.973415	1.01208
	Bleb. n.d. 8h f	19.5512	19.591	19.5162	19.4863	19.5362	26.8783	26.6833	26.9157	27.2739	26.9378	13152.8	77.7881	176.369	0.989954
	Bleb. n.d. 8h F	18.4898	18.3392	18.4245	18.4791	18.4332	25.8909	25.7022	25.5817	26.1061	25.8202	28253.1	168.789	178.159
	Control S 8h f	19.6637	19.5228	19.752	19.6403	19.6447	26.4192	26.2473	26.1896	26.7284	26.3961	12200	113.233	276.784	117.006
	Control S 8h F	19.1298	19.067	18.8634	19.1961	19.0641	32.834	32.435	32.6843	32.7904	32.6859	18245.2	1.44728	2.36556
	Bleb. S 8h f	20.0947	19.9326	19.8172	20.0161	19.9651	27.5639	27.3767	27.4309	27.9894	27.5902	9770.16	49.4901	151.059	1.99657
	Bleb. S 8h F	19.0876	19.1677	19.071	19.0544	19.0952	27.6995	27.55	27.8335	27.7883	27.7178	17855.7	45.301	75.6591

## Sheet: qPCR Primers
	Primers used for the qPCR experiments
	eF1alpha	Forward	TGCTGTTGTCCCAATCTCTG
		Reverse	AAGACGGAGTGGTTTGGATG
	ß-cat	Forward	ACAAAGCATGCAAGACGGTG
		Reverse	AGCGGCTACTCGAACAACAT
	Wnt6	Forward	AGCCAATCAGAAATCCCCGG
		Reverse	ACCGTGACAGCTGCATACTC
	Wnt3	Forward	ATCATGGCAGGTGGAAACTC
		Reverse	CCCCATTTCCAACCTTCTTC
	Axin	Forward	CTCGAGGTCACAATCGCGAT
		Reverse	GGCCATCTCTAGTTCGGTCG
	FoxA	Forward	AGCCCGGTAAAGGAAGCTTC
		Reverse	TCGGGTTTCCTTTGCGATCA
	Bra1	Forward	GCAACACCCACAACAACAAC
		Reverse	TACGGGAAACATACGCCTTC
