# Supplementary material for: Pattern regulation in a regenerating jellyfish
Source: eLife journal article supplement (doi:10.7554/elife.54868), 2020-09-07
Supplement: supp [file elife_poa_e54868_Figure_1_source_data_1.xlsx]

## Sheet: Figure1S2-Soruce-data
	Figure 1S2C - Gonad regeneration	fed (6dpd)	unfed (6dpd)
	complete radial canal	3	7
	cells in the radial canal	12	46
	thickening of the radial canal	29	3
	thin gonad	13	0
	3D gonad with visible oocytes	3	0
	nb total jellyfish	60	56
	Figure 1S2D - Tentacle bulb regeneration	fed (6dpd)	unfed (6dpd)
	complete circular canal	15	13
	cell cluster	11	43
	bulb-shape cell cluster	7	0
	small bulb with tentacle	18	4
	bulb with tentacle	9	0
	nb total jellyfish	60	60
	Figure 1S2E - Manubrum generation	24 hpd	48 hpd	72 hpd	96 hpd
	hole closed, no blastema	1	0	0	0
	flat blastema	23	3	0	0
	3D blastema	0	21	1	0
	elongated tube	0	0	23	1
	Complete manubrium	0	0	0	23
	nb total jellyfish	24	24	24	24
	Figure1S2F,G	non-dissected manubrium
		size of the base (mm)	length (mm)	jellyfish diameter (mm)
	Jellyfish 1	0.4	0.45	4.9
	Jellyfish 2	0.3	0.65	5.2
	Jellyfish 3	0.3	0.4	6.1
	Jellyfish 4	0.35	0.65	4.9
	Jellyfish 5	0.25	0.65	4.4
	Jellyfish 6	0.3	0.65	5.5
	Jellyfish 7	0.25	0.7	5.2
	Jellyfish 8	0.35	0.5	5.7
	Jellyfish 9	0.35	0.7	5.2
	Jellyfish 10	0.3	0.65	5.3
	Jellyfish 11	0.25	0.65	4.7
	Jellyfish 12	0.3	0.55	5.4
	Jellyfish 13	0.25	0.5	4.4
	Jellyfish 14	0.25	0.55	4
	Jellyfish 15	0.25	0.6	4.5
	Jellyfish 16	0.25	0.6	4.6
	Jellyfish 17	0.3	0.7	5.8
	Jellyfish 18	0.25	0.6	4.9
	Jellyfish 19	0.25	0.7	4.8
	Jellyfish 20	0.25	0.5	4.8
	Average	0.2875	0.5975	5.015
	St. dev.	0.0455233	0.089553	0.527432
		regenerated manubrium (4 dpd)
		size of the base (mm)	length (mm)	jellyfish diameter (mm)
	Jellyfish 21	0.25	0.2	4.5
	Jellyfish 22	0.4	0.1	4.3
	Jellyfish 23	0.35	0.15	4.3
	Jellyfish 24	0.25	0.25	3.9
	Jellyfish 25	0.3	0.2	5
	Jellyfish 26	0.25	0.3	4.8
	Jellyfish 27	0.2	0.15	4
	Jellyfish 28	0.25	0.2	4.8
	Jellyfish 29	0.25	0.25	4.3
	Jellyfish 30	0.25	0.3	5.5
	Jellyfish 31	0.25	0.3	3.6
	Jellyfish 32	0.3	0.25	3.7
	Jellyfish 33	0.25	0.2	4.3
	Jellyfish 34	0.2	0.3	4.3
	Jellyfish 35	0.25	0.25	3.3
	Jellyfish 36	0.2	0.35	4
	Jellyfish 37	0.25	0.3	4.3
	Jellyfish 38	0.2	0.25	4.3
	Jellyfish 39	0.25	0.15	3.6
	Jellyfish 40	0.25	0.3	3.6
	Average	0.2575	0.2375	4.22
	St. dev.	0.0494043	0.0666392	0.538614
