# Supplementary material for: Pattern regulation in a regenerating jellyfish
Source: eLife journal article supplement (doi:10.7554/elife.54868), 2020-09-07
Supplement: supp [file elife_poa_e54868_Figure_8_source_data_1.xlsx]

## Sheet: Figure8-S1B
	Figure8-S1B	Condition	Treatment	Nb contractions / 5 minutes
	Jellyfish 1	Non-dissected	Control	208
	Jellyfish 2	Non-dissected	Control	119
	Jellyfish 3	Non-dissected	Control	133
	Jellyfish 4	Non-dissected	Control	53
	Jellyfish 5	Non-dissected	Control	190
	Jellyfish 6	Non-dissected	Control	270
	Jellyfish 7	Non-dissected	Control	235
	Jellyfish 8	Non-dissected	Control	220
	Jellyfish 9	Non-dissected	Control	112
	Jellyfish 10	Non-dissected	Control	222
	Jellyfish 11	Bissected 0-5min	Control	512
	Jellyfish 12	Bissected 0-5min	Control	506
	Jellyfish 13	Bissected 0-5min	Control	324
	Jellyfish 14	Bissected 0-5min	Control	481
	Jellyfish 15	Bissected 0-5min	Control	341
	Jellyfish 16	Bissected 0-5min	Control	503
	Jellyfish 17	Bissected 0-5min	Control	304
	Jellyfish 18	Bissected 0-5min	Control	330
	Jellyfish 19	Bissected 0-5min	Control	463
	Jellyfish 20	Bissected 0-5min	Control	322
	Jellyfish 21	Non-dissected	Menthol	0
	Jellyfish 22	Non-dissected	Menthol	0
	Jellyfish 23	Non-dissected	Menthol	0
	Jellyfish 24	Non-dissected	Menthol	0
	Jellyfish 25	Non-dissected	Menthol	0
	Jellyfish 26	Non-dissected	Menthol	0
	Jellyfish 27	Non-dissected	Menthol	0
	Jellyfish 28	Non-dissected	Menthol	0
	Jellyfish 29	Non-dissected	Menthol	0
	Jellyfish 30	Non-dissected	Menthol	0
	Jellyfish 31	Bissected 0-5min	Menthol	0
	Jellyfish 32	Bissected 0-5min	Menthol	0
	Jellyfish 33	Bissected 0-5min	Menthol	0
	Jellyfish 34	Bissected 0-5min	Menthol	0
	Jellyfish 35	Bissected 0-5min	Menthol	0
	Jellyfish 36	Bissected 0-5min	Menthol	0
	Jellyfish 37	Bissected 0-5min	Menthol	0
	Jellyfish 38	Bissected 0-5min	Menthol	0
	Jellyfish 39	Bissected 0-5min	Menthol	0
	Jellyfish 40	Bissected 0-5min	Menthol	0
