# Supplementary figures and images for: Pattern regulation in a regenerating jellyfish
Source: eLife journal article supplement (doi:10.7554/elife.54868), 2020-09-07

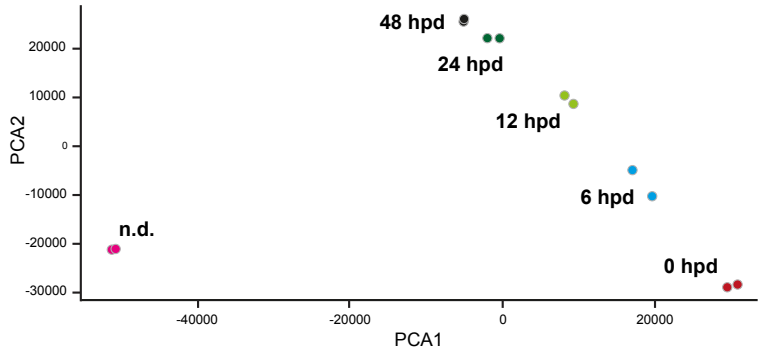

Supplement: supp [file elife_poa_e54868_Figure_10_figure_supplement_1.pdf › elife_poa_e54868_Figure_10_figure_supplement_1.pdf]

24 hpf control

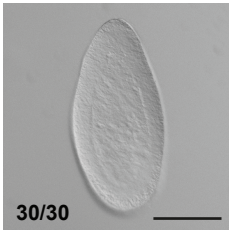

24 hpf PKF (3-24 hpf)

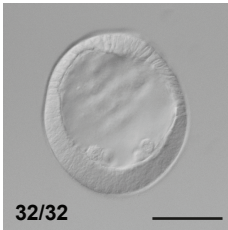

48 hpf PKF (3-24 hpf)

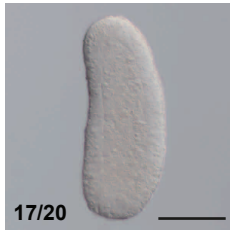

Supplement: supp [file elife_poa_e54868_Figure_10_figure_supplement_2.pdf › elife_poa_e54868_Figure_10_figure_supplement_2.pdf]

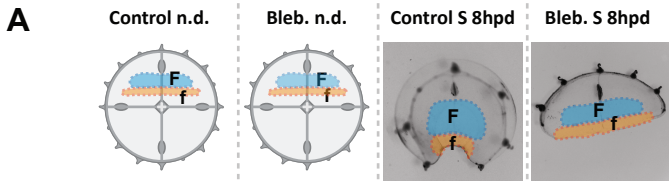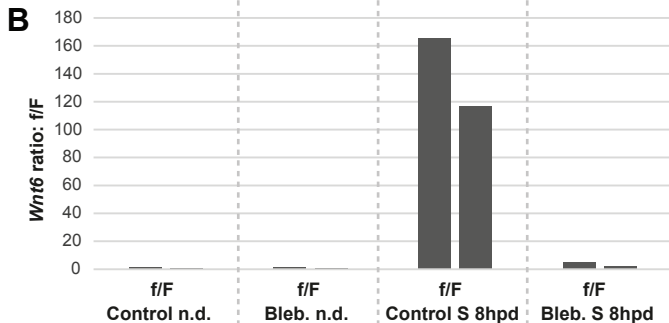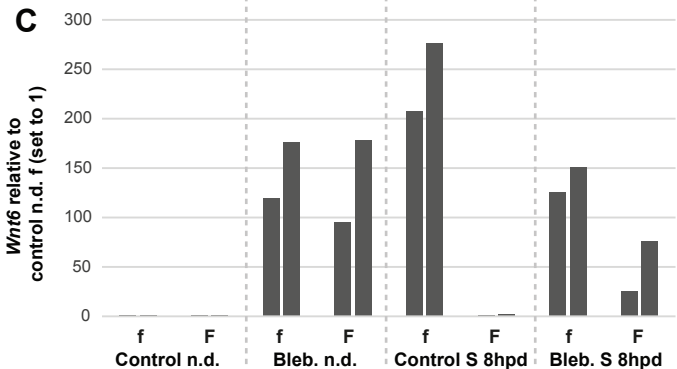

Supplement: supp [file elife_poa_e54868_Figure_11_figure_supplement_1.pdf › elife_poa_e54868_Figure_11_figure_supplement_1.pdf]

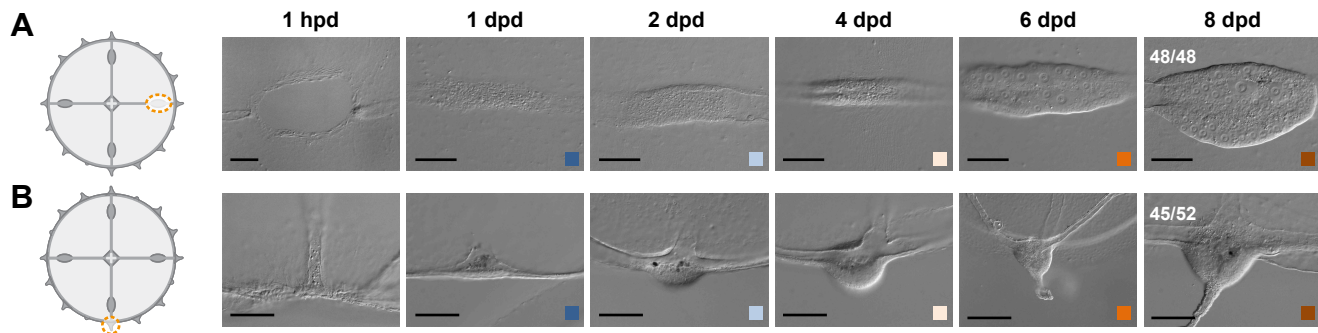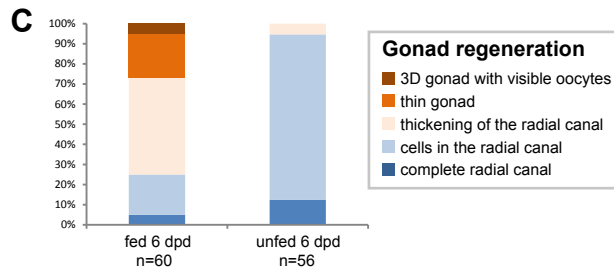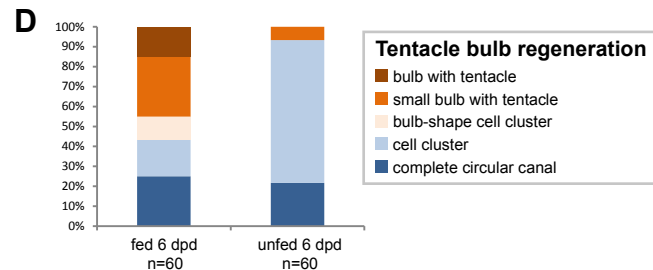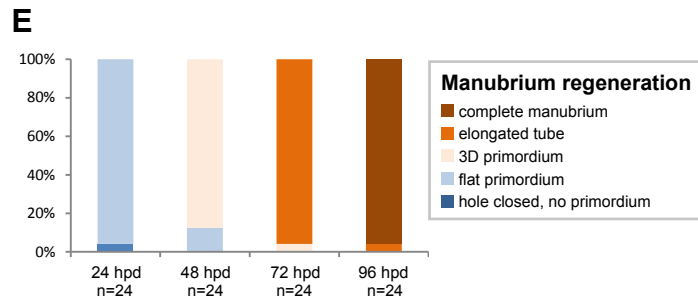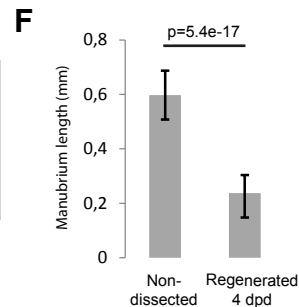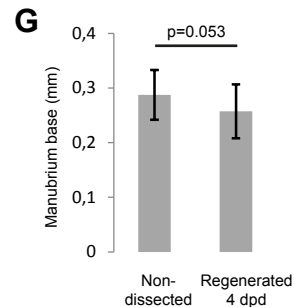

Supplement: supp [file elife_poa_e54868_Figure_1_figure_supplement_1.pdf › elife_poa_e54868_Figure_1_figure_supplement_1.pdf]

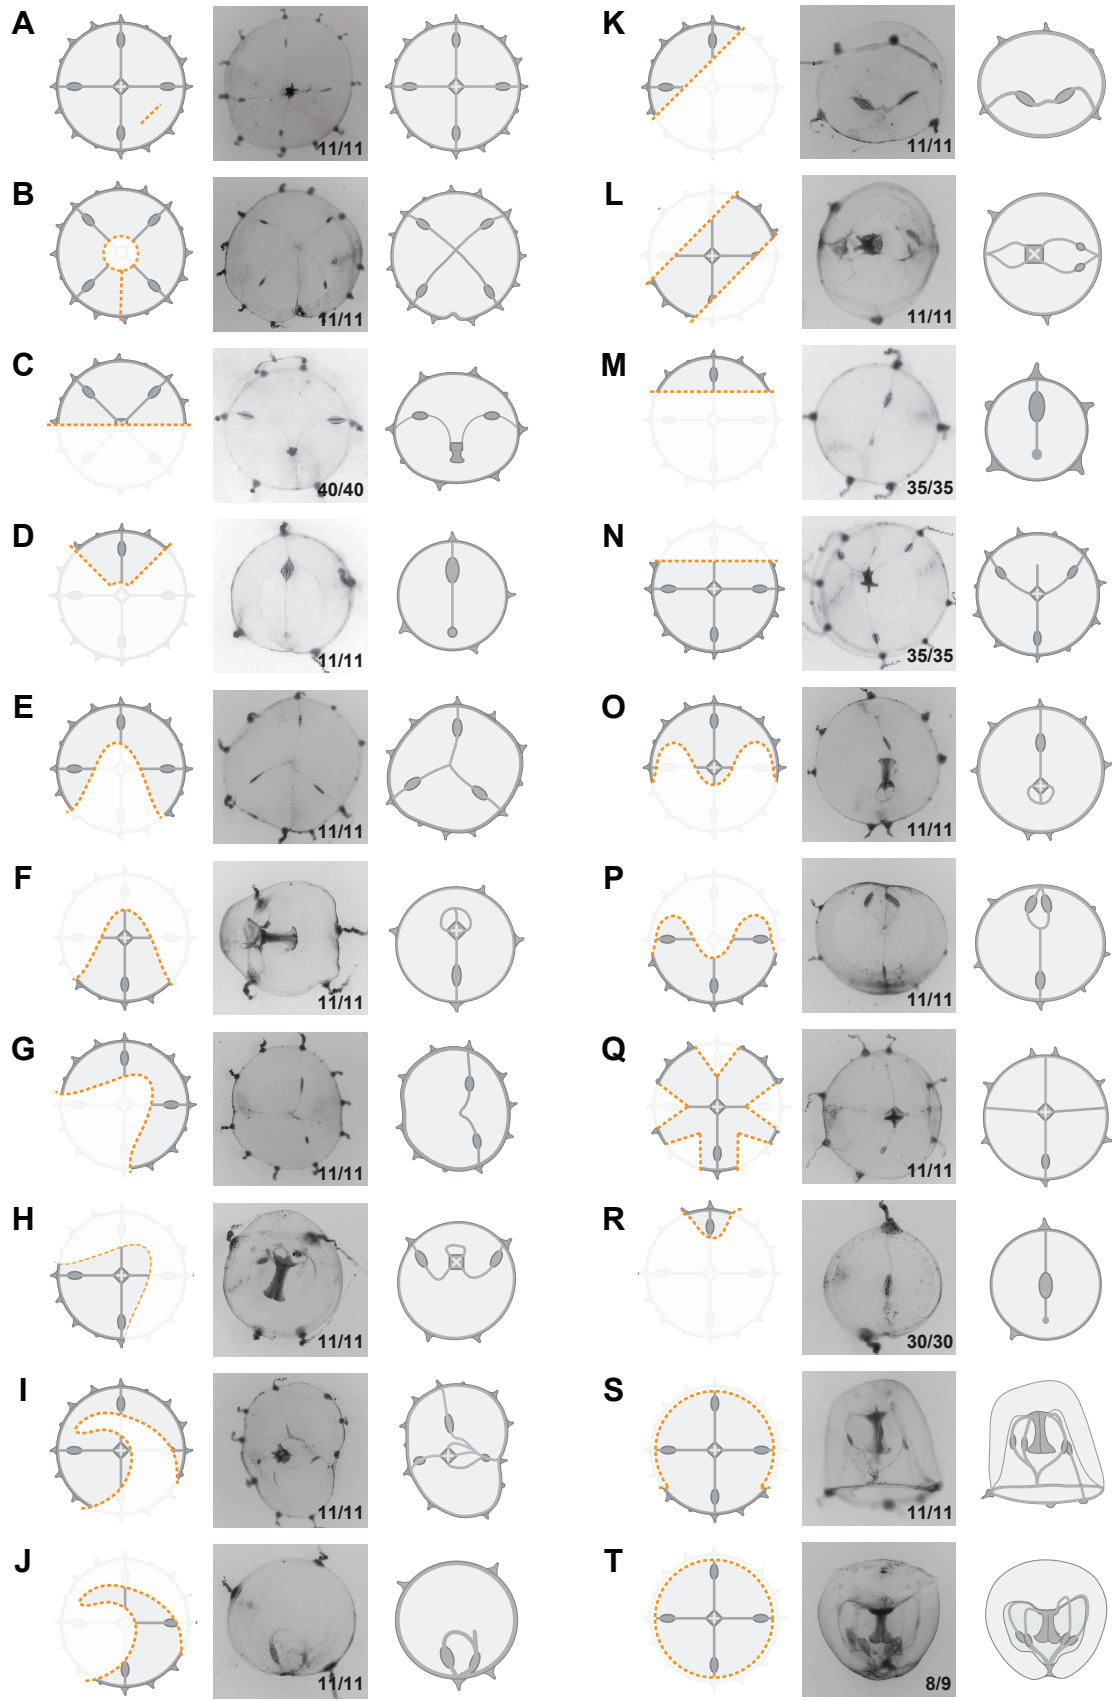

Supplement: supp [file elife_poa_e54868_Figure_1_figure_supplement_2.pdf › elife_poa_e54868_Figure_1_figure_supplement_2.pdf]

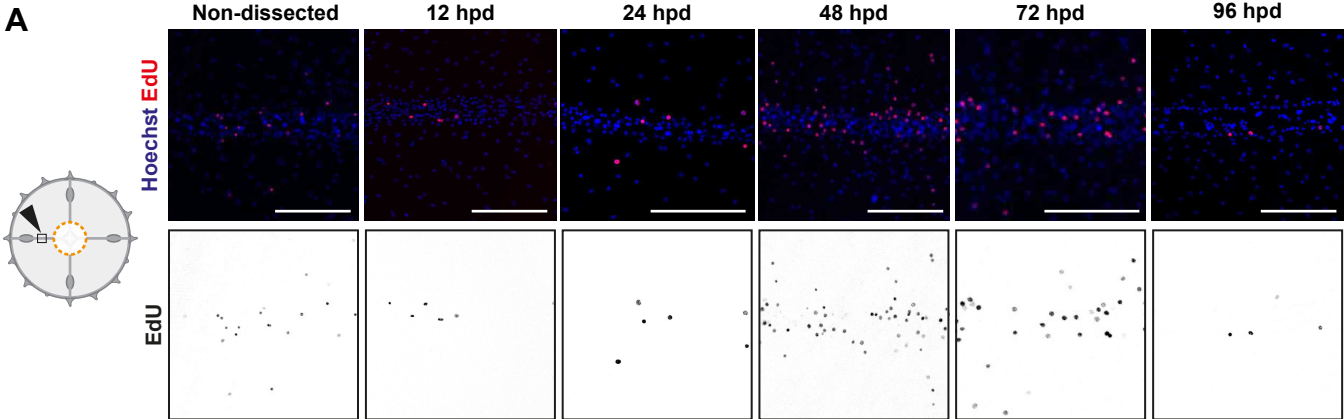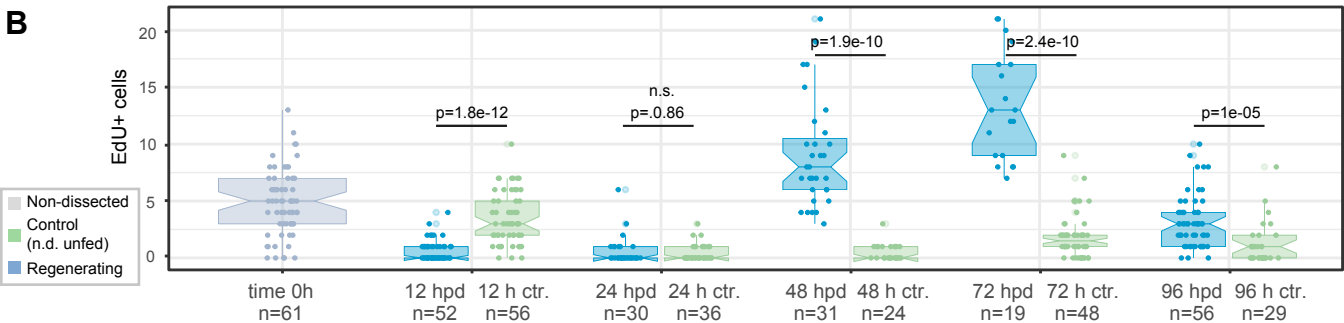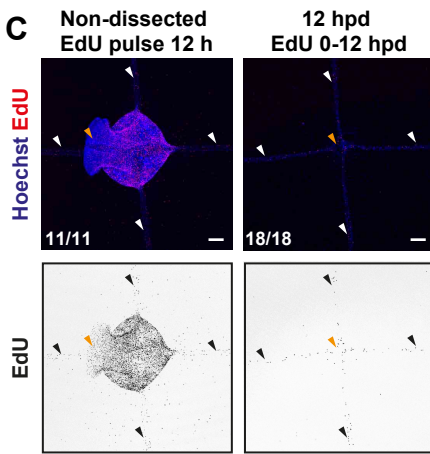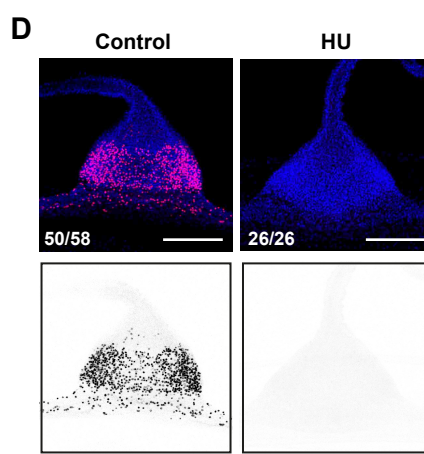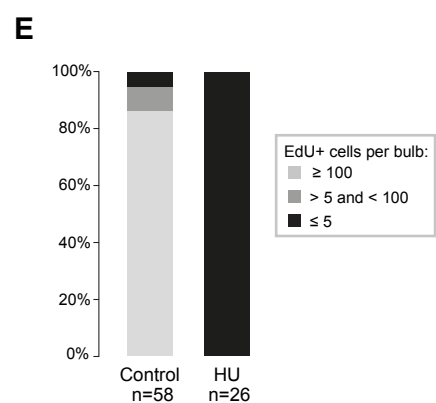

Supplement: supp [file elife_poa_e54868_Figure_2_figure_supplement_1.pdf › elife_poa_e54868_Figure_2_figure_supplement_1.pdf]

Non-dissected medusa - **Nanos1** / **Hoechst**

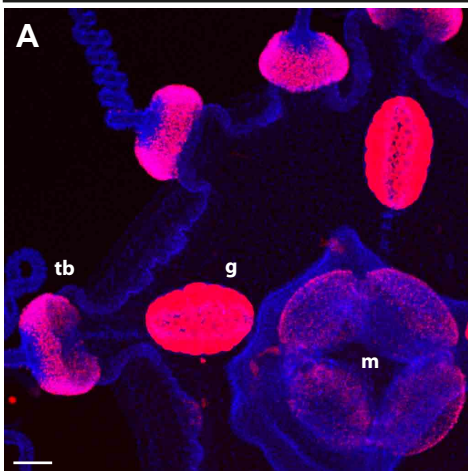

Donor medusa - **EdU** / **Nanos1**

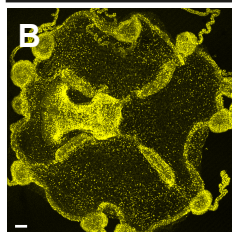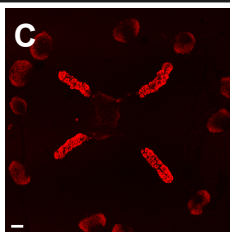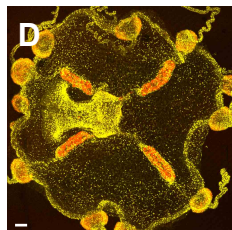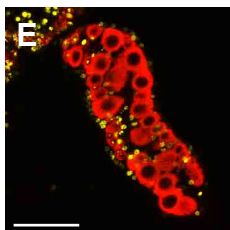

3 dpf / 48 hpd - **EdU** / **Nanos1** / **Hoechst**

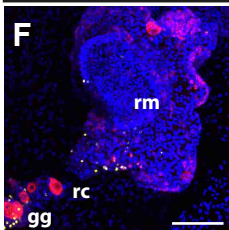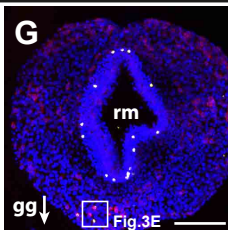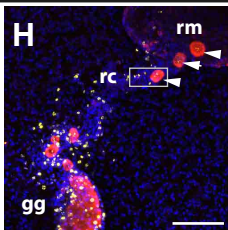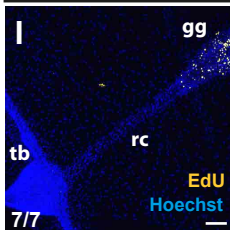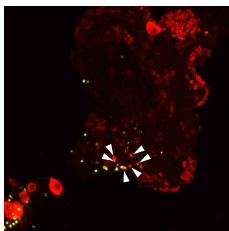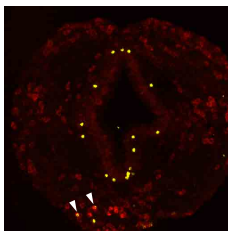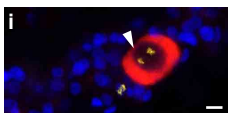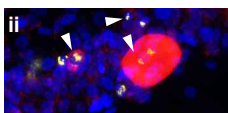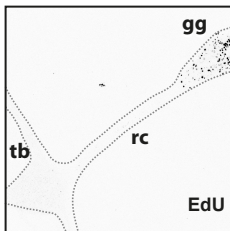

Supplement: supp [file elife_poa_e54868_Figure_3_figure_supplement_1.pdf › elife_poa_e54868_Figure_3_figure_supplement_1.pdf]

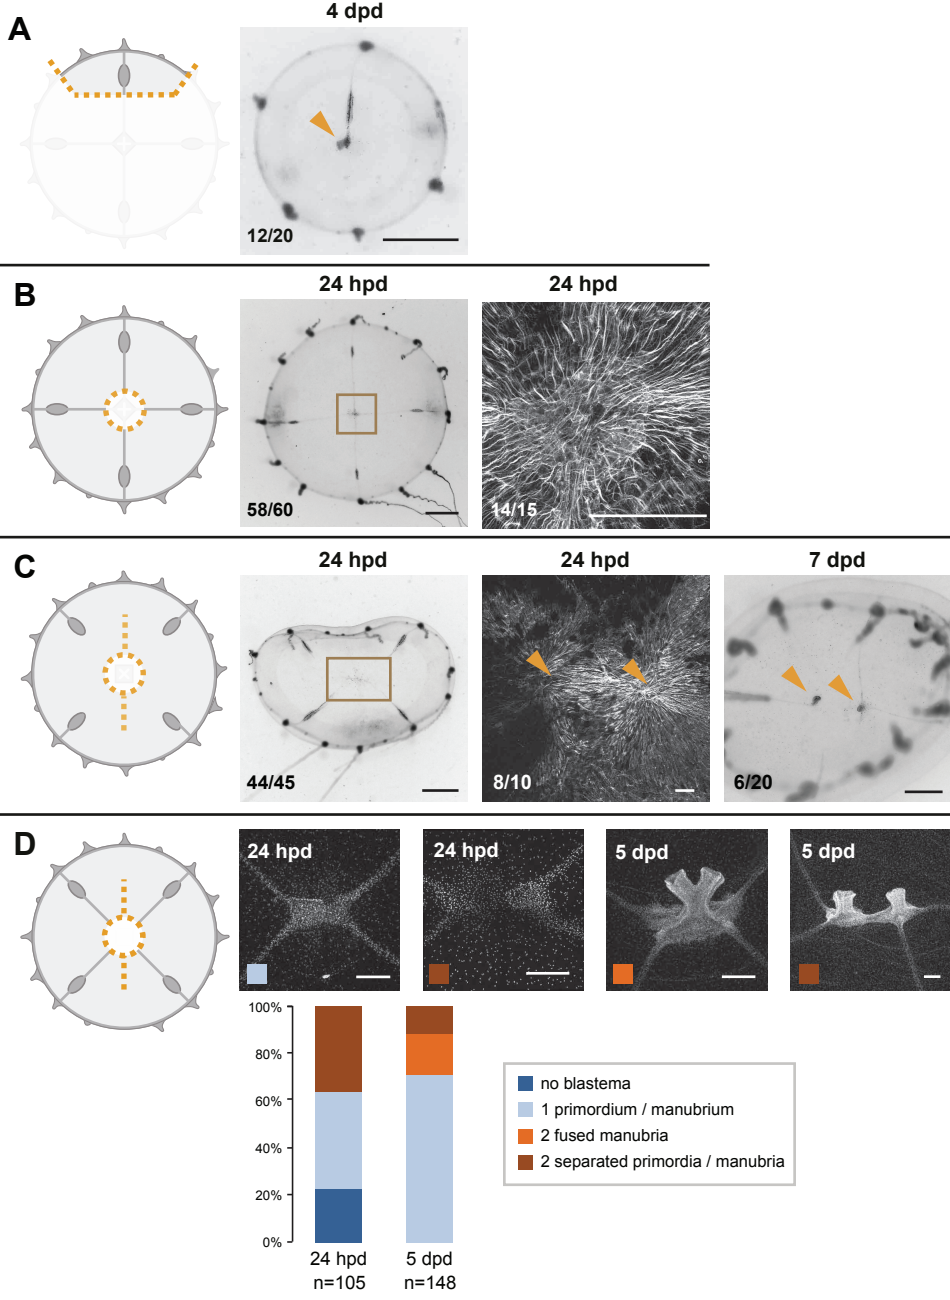

Supplement: supp [file elife_poa_e54868_Figure_6_figure_supplement_1.pdf › elife_poa_e54868_Figure_6_figure_supplement_1.pdf]

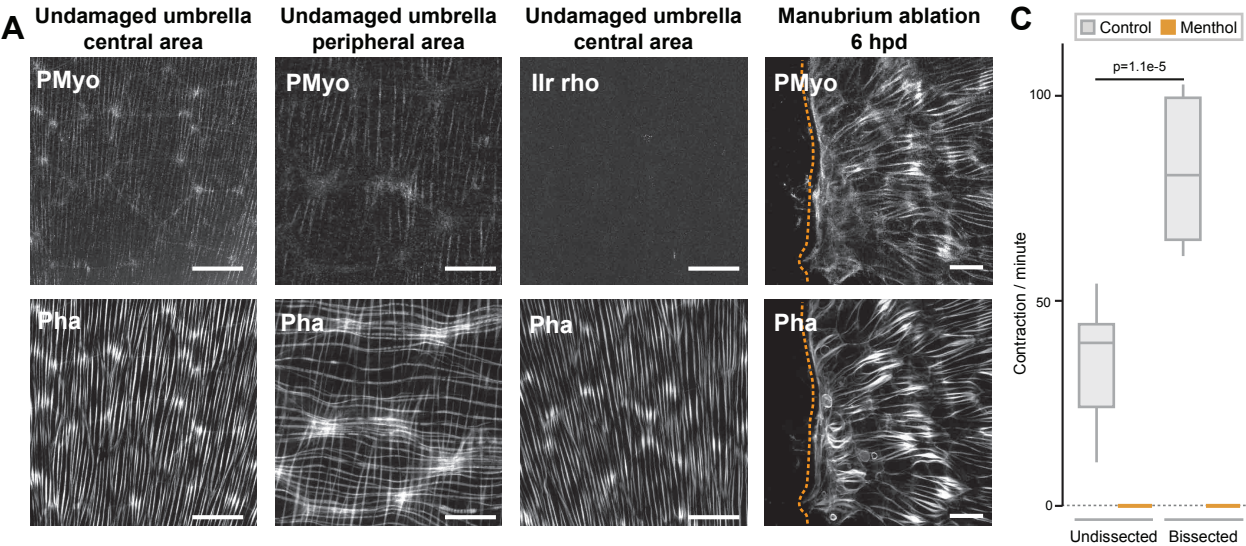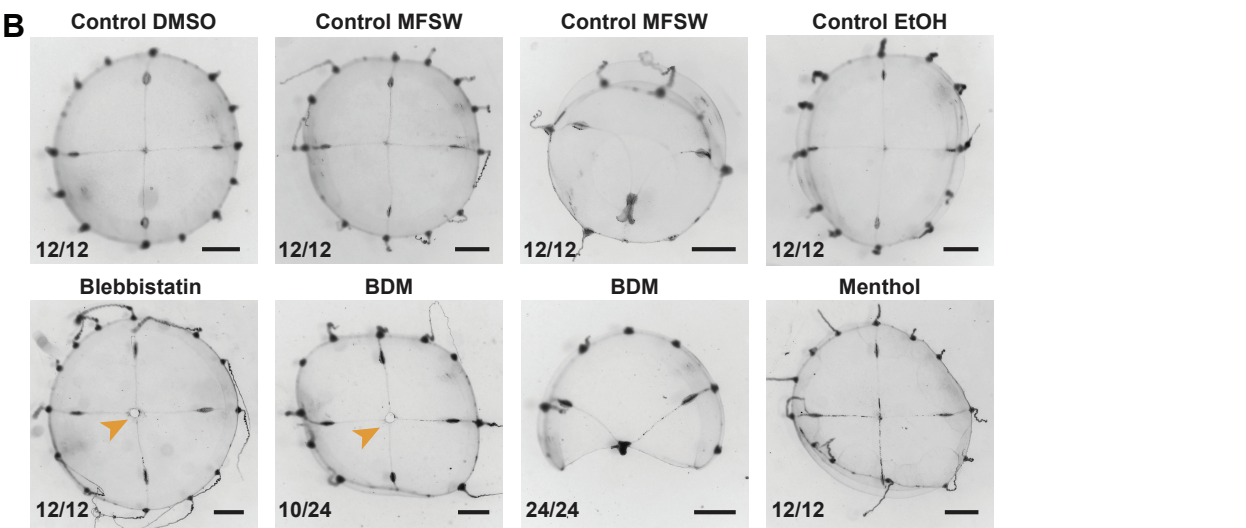

Supplement: supp [file elife_poa_e54868_Figure_8_figure_supplement_1.pdf › elife_poa_e54868_Figure_8_figure_supplement_1.pdf]

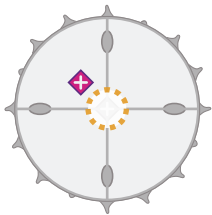

Organized hub

Disorganized hub

2 dpg / 12 hpd

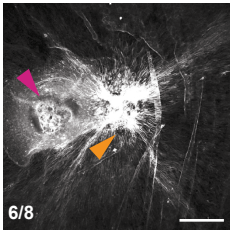

2dpg / 24 hpd

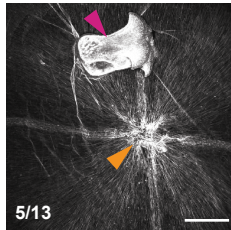

3 dpg / 48 hpd

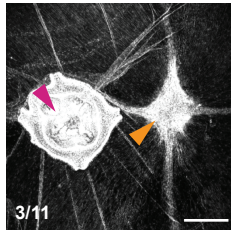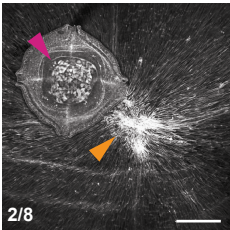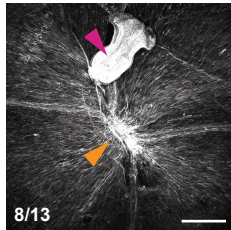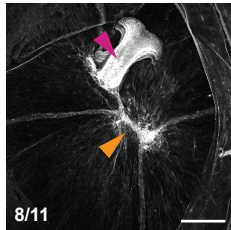

Supplement: supp [file elife_poa_e54868_Figure_9_figure_supplement_1.pdf › elife_poa_e54868_Figure_9_figure_supplement_1.pdf]
